# Supplementary material for: Comparison of sagittal plane gait characteristics between the overground and treadmill approach for gait analysis in typically developing children
Source: PeerJ. 2022 Jul 22;10:e13752. doi: 10.7717/peerj.13752 (PMC9310770; doi:10.7717/peerj.13752)
Supplement: Supplemental Information 2 — 1 Overground approach 2 Treadmill approach [file peerj-10-13752-s002.xlsx]

## Sheet: Blad1
Speed_1	Speed_2	Stridetime_1	Stridetime_2	Stancetime_1	Stancetime_2	Swingtime_1	Swingtime_2	Steplength_1	Steplength_2	Stepwidth_1	Stepwidth_2
1.014	0.85	0.848	0.91	0.52	0.53	0.328	0.38	0.453	0.4	0.09	0.14
1.063	1.03	0.833	0.83	0.525	0.47	0.308	0.36	0.444	0.43	0.12	0.13
1.321	1.2	0.714	0.7	0.423	0.39	0.291	0.31	0.466	0.42	0.114	0.13
1.173	1.17	0.79	0.76	0.483	0.42	0.307	0.34	0.479	0.45	0.098	0.15
1.069	1.06	0.846	0.82	0.507	0.47	0.338	0.35	0.448	0.44	0.209	0.21
1.29	1.36	0.732	0.72	0.449	0.41	0.283	0.32	0.466	0.5	0.136	0.12
0.818	0.87	0.933	0.93	0.579	0.54	0.355	0.39	0.394	0.41	0.184	0.17
1.216	1.19	0.804	0.83	0.512	0.48	0.292	0.35	0.496	0.5	0.132	0.2
1.391	1.38	0.811	0.75	0.481	0.42	0.33	0.33	0.566	0.52	0.06	0.09
1.353	1.36	0.842	0.79	0.502	0.44	0.339	0.35	0.545	0.52	0.198	0.13
1.127	1.11	0.908	0.89	0.664	0.49	0.245	0.39	0.51	0.49	0.085	0.07
1.301	1.27	0.838	0.89	0.521	0.5	0.317	0.39	0.526	0.56	0.107	0.13
1.33	1.3	0.899	0.9	0.547	0.51	0.351	0.39	0.577	0.58	0.097	0.14
1.417	1.37	0.885	0.85	0.543	0.49	0.342	0.36	0.647	0.58	0.125	0.14
1.4	1.38	0.851	0.76	0.514	0.43	0.336	0.33	0.578	0.52	0.08	0.08
1.454	1.37	0.794	0.83	0.484	0.46	0.31	0.36	0.579	0.57	0.085	0.21
1.356	1.36	0.836	0.77	0.496	0.44	0.34	0.33	0.593	0.54	0.085	0.13
1.276	1.24	0.871	0.9	0.525	0.51	0.346	0.39	0.553	0.55	0.098	0.13
1.262	1.22	1.003	1	0.616	0.64	0.387	0.36	0.631	0.62	0.103	0.13
1.427	1.29	0.811	0.82	0.493	0.46	0.319	0.36	0.584	0.53	0.134	0.24
1.273	1.22	0.865	0.85	0.531	0.48	0.334	0.37	0.559	0.53	0.12	0.11
1.313	1.37	0.921	0.86	0.555	0.47	0.366	0.38	0.607	0.6	0.107	0.13
1.292	1.23	0.954	0.92	0.601	0.53	0.353	0.4	0.619	0.56	0.099	0.2
1.547	1.45	0.832	0.84	0.501	0.47	0.331	0.37	0.63	0.61	0.105	0.1
1.399	1.37	0.883	0.85	0.535	0.49	0.348	0.36	0.612	0.58	0.08	0.1
1.222	1.21	1.031	0.99	0.64	0.57	0.391	0.42	0.642	0.61	0.095	0.16
1.372	1.27	0.845	0.78	0.519	0.46	0.326	0.32	0.581	0.49	0.106	0.18
1.596	1.56	0.911	0.87	0.548	0.5	0.362	0.37	0.703	0.66	0.106	0.13
1.37	1.32	0.858	0.87	0.511	0.48	0.347	0.39	0.599	0.58	0.108	0.11
1.383	1.33	0.894	0.9	0.551	0.52	0.343	0.38	0.616	0.59	0.125	0.14
1.198	1.19	1.05	1.03	0.664	0.6	0.385	0.43	0.628	0.6	0.106	0.12
1.216	1.18	0.944	0.95	0.591	0.55	0.353	0.39	0.56	0.56	0.101	0.13
1.092	1.08	1.019	0.94	0.636	0.56	0.383	0.38	0.556	0.5	0.101	0.12
1.304	1.29	0.957	0.97	0.62	0.57	0.337	0.4	0.621	0.65	0.184	0.21
1.278	1.32	0.97	0.95	0.587	0.55	0.383	0.41	0.627	0.62	0.105	0.16
1.277	1.34	1.032	0.96	0.627	0.56	0.406	0.4	0.688	0.65	0.104	0.16
1.417	1.32	0.938	0.95	0.566	0.54	0.371	0.41	0.652	0.63	0.08	0.05
1.364	1.32	0.949	0.94	0.569	0.53	0.38	0.41	0.652	0.63	0.129	0.13
1.217	1.22	1.007	0.91	0.628	0.55	0.379	0.37	0.62	0.56	0.074	0.18
1.278	1.3	0.999	0.98	0.61	0.58	0.389	0.4	0.641	0.64	0.128	0.21
1.375	1.38	0.944	0.92	0.583	0.55	0.361	0.37	0.658	0.64	0.154	0.19
1.187	1.18	0.969	0.93	0.591	0.53	0.378	0.4	0.558	0.55	0.119	0.17
1.337	1.4	1.022	1	0.616	0.57	0.405	0.43	0.694	0.69	0.1	0.11
1.163	1.18	1.073	1.04	0.69	0.63	0.383	0.41	0.636	0.62	0.189	0.24
1.312	1.3	0.93	0.89	0.589	0.52	0.341	0.37	0.604	0.58	0.103	0.15
1.188	1.13	1.069	1.08	0.663	0.61	0.406	0.47	0.642	0.62	0.185	0.25
1.465	1.52	0.967	0.97	0.585	0.57	0.381	0.4	0.729	0.75	0.109	0.14
1.414	1.38	1.058	1.01	0.644	0.58	0.415	0.42	0.74	0.7	0.108	0.13
1.207	1.2	1.096	1.02	0.917	0.6	0.179	0.42	0.647	0.61	0.098	0.15
1.215	1.21	1.094	1.03	0.683	0.61	0.411	0.43	0.662	0.63	0.122	0.18
1.353	1.34	1.047	1.05	0.665	0.61	0.382	0.44	0.719	0.7	0.084	0.11
1.427	1.43	0.98	1	0.592	0.58	0.388	0.42	0.699	0.71	0.089	0.18
1.251	1.25	1.112	1.12	0.705	0.67	0.407	0.44	0.691	0.71	0.081	0.11
1.389	1.39	1.029	1.05	0.652	0.63	0.377	0.41	0.711	0.72	0.12	0.14
1.392	1.4	0.948	0.96	0.583	0.57	0.365	0.39	0.684	0.68	0.118	0.14
1.355	1.23	1.041	1	0.644	0.6	0.397	0.4	0.709	0.61	0.111	0.16
1.167	1.13	1.136	1.12	0.726	0.68	0.41	0.44	0.68	0.65	0.129	0.15
