# Supplementary material for: Comparison of sagittal plane gait characteristics between the overground and treadmill approach for gait analysis in typically developing children
Source: PeerJ. 2022 Jul 22;10:e13752. doi: 10.7717/peerj.13752 (PMC9310770; doi:10.7717/peerj.13752)
Supplement: Supplemental Information 3 — Each column represents a percentage of the gait cycle (0–100%). Every raw represents data of one child. Sheet 1: Data of the overground approach Sheet 2: Data of the treadmill approach. [file peerj-10-13752-s003.xlsx]

## Sheet: 1
0.645733	0.872493	0.943256	0.815106	0.537823	0.282372	0.0843912	-0.0769794	-0.133228	-0.118635	-0.122755	-0.102974	-0.0691604	-0.0375664	-0.0260946	-0.0312815	-0.0532183	-0.0863611	-0.124062	-0.161045	-0.193136	-0.218199	-0.23316	-0.240967	-0.247318	-0.255019	-0.265116	-0.276376	-0.293426	-0.284186	-0.263073	-0.276579	-0.344174	-0.374067	-0.395415	-0.422458	-0.456471	-0.498985	-0.546016	-0.596111	-0.649081	-0.703772	-0.757286	-0.806423	-0.846557	-0.875369	-0.889007	-0.887319	-0.872108	-0.836952
0.679832	1.12585	0.978273	0.421158	0.272509	0.212647	0.0980992	-0.0505831	-0.000639682	0.0412127	0.0807298	0.107353	0.12157	0.0953902	0.0331416	-0.0154244	-0.0709892	-0.0919077	-0.0817496	-0.0799278	-0.0823472	-0.0945673	-0.106357	-0.107869	-0.0974452	-0.0784011	-0.0576024	-0.0400408	-0.0260288	-0.0141237	-0.00619519	-0.00673564	-0.0315872	-0.0819564	-0.152895	-0.235375	-0.316733	-0.38746	-0.446481	-0.496103	-0.545501	-0.598809	-0.65321	-0.709966	-0.767968	-0.820866	-0.866863	-0.909451	-0.941859	-0.925443
0.190907	0.427163	0.528139	0.54887	0.416182	0.319283	0.25597	0.054403	-0.0257094	-0.0368521	-0.0383502	-0.0236986	-0.00995245	0.00329835	0.0146845	0.0230884	0.0252834	0.0144693	0.000496978	-0.00766183	-0.00826813	-0.00134541	0.0118015	0.0279879	0.048206	0.0631846	0.0699023	0.0718667	0.0670462	0.0534251	0.0330341	0.00684756	-0.0307366	-0.0699132	-0.113505	-0.157518	-0.199169	-0.239205	-0.277589	-0.315986	-0.355107	-0.394078	-0.431011	-0.467144	-0.499791	-0.531234	-0.552139	-0.570722	-0.582203	-0.589115
0.53866	0.831693	0.585985	0.149819	0.168568	0.242374	0.266977	0.226152	0.24087	0.226172	0.199045	0.170073	0.145949	0.130766	0.122151	0.115754	0.114407	0.118951	0.124071	0.121271	0.1146	0.105836	0.0964933	0.0862256	0.0745611	0.0603663	0.0425668	0.0249656	0.00968437	-0.000743186	-0.00715068	-0.0154812	-0.0317855	-0.0595752	-0.0906122	-0.124785	-0.165351	-0.213481	-0.265614	-0.316067	-0.365344	-0.411613	-0.455606	-0.495094	-0.531876	-0.567888	-0.599487	-0.620816	-0.648594	-0.748842
0.0481203	0.173265	0.278447	0.59239	1.10561	1.17432	0.974788	0.736812	0.641792	0.505021	0.309849	0.0651544	-0.0158468	-0.00643331	0.094968	0.231753	0.350682	0.416942	0.422987	0.33856	0.111754	-0.0606206	-0.111528	-0.0462682	0.0359651	0.0553008	0.0372514	0.00760744	-0.020565	-0.0308048	-0.0680975	-0.0787966	-0.0252709	0.0276735	0.0212266	-0.0294689	-0.090484	-0.103356	-0.114322	-0.110738	-0.115894	-0.138654	-0.247389	-0.350527	-0.4535	-0.56783	-0.634598	-0.652975	-0.694609	-0.764939
0.75314	0.966699	0.832726	0.475839	0.207694	0.0568565	-0.0479202	-0.13056	-0.142765	-0.07975	0.00338175	0.0672092	0.114002	0.135261	0.130913	0.10106	0.0494344	-0.012563	-0.0730012	-0.120663	-0.150871	-0.164138	-0.162006	-0.150341	-0.136629	-0.126837	-0.124743	-0.131177	-0.146093	-0.169675	-0.200003	-0.23714	-0.278246	-0.322472	-0.370974	-0.421019	-0.46965	-0.514671	-0.558589	-0.600555	-0.642788	-0.687354	-0.733046	-0.777049	-0.817784	-0.852178	-0.879385	-0.902241	-0.89941	-0.837976
0.319122	0.468257	0.717472	0.9678	0.885547	0.814074	0.655398	0.432233	0.249122	0.0752156	-0.0508337	-0.138999	-0.184066	-0.204085	-0.205606	-0.182991	-0.1463	-0.113657	-0.099254	-0.108833	-0.139647	-0.178939	-0.219037	-0.251579	-0.271928	-0.280291	-0.281094	-0.278066	-0.274803	-0.275228	-0.276436	-0.283245	-0.294524	-0.310808	-0.33385	-0.365799	-0.403267	-0.441898	-0.47543	-0.509102	-0.549439	-0.604031	-0.617292	-0.650804	-0.696906	-0.739389	-0.781452	-0.834146	-0.864222	-0.867721
0.113676	0.207799	0.234042	0.141371	0.132631	0.152263	0.143264	0.101092	0.032765	-0.0451882	-0.0841757	-0.0881952	-0.0540385	-0.0271138	-0.032129	-0.0223375	-0.010028	-0.0165164	-0.0314539	-0.060627	-0.0891588	-0.109342	-0.1262	-0.132101	-0.1396	-0.14214	-0.138572	-0.138171	-0.150138	-0.168859	-0.18144	-0.184622	-0.190736	-0.209615	-0.231624	-0.243574	-0.254384	-0.283485	-0.311464	-0.329492	-0.349716	-0.373433	-0.384457	-0.385098	-0.390475	-0.415637	-0.436676	-0.438357	-0.46624	-0.51576
0.572715	0.742523	0.901112	0.77793	0.52113	0.282789	0.14117	0.0282463	-0.0803303	-0.159797	-0.186959	-0.220461	-0.240625	-0.256283	-0.267905	-0.277598	-0.281362	-0.280475	-0.274228	-0.262818	-0.256347	-0.267922	-0.245577	-0.206324	-0.144614	-0.109039	-0.0940586	-0.0882184	-0.0975189	-0.112363	-0.138249	-0.173147	-0.215187	-0.265161	-0.322655	-0.390763	-0.462862	-0.536569	-0.605872	-0.670953	-0.731425	-0.78966	-0.845254	-0.895731	-0.936827	-0.96632	-0.98328	-0.989266	-0.981258	-0.958435
0.322798	0.467104	0.0776845	0.568872	1.03148	0.631787	0.240089	0.370947	-0.00700854	-0.391762	-0.211708	-0.177221	-0.249966	-0.144855	-0.0539417	-0.0876754	-0.126104	-0.142133	-0.099299	-0.187694	-0.319011	-0.175228	-0.112007	-0.235033	-0.161868	-0.197336	-0.217494	-0.407203	-0.287657	-0.307675	-0.397008	-0.203285	-0.446362	-0.366799	-0.37441	-0.464393	-0.622822	-0.58033	-0.574373	-0.753658	-0.797543	-0.722898	-0.859841	-0.900718	-0.870378	-1.06328	-0.913093	-1.14925	-0.959866	-1.07832
0.424892	0.569916	0.512112	0.295815	0.212312	0.0876044	0.0374574	0.0673988	0.0585646	0.0547309	0.0407468	0.0380182	0.05307	0.0739366	0.090026	0.0989744	0.0981718	0.0867098	0.0734551	0.0674579	0.065873	0.0641912	0.0612959	0.0592101	0.0522132	0.0394732	0.0196835	-0.00284743	-0.0264562	-0.0527682	-0.0798937	-0.110112	-0.145661	-0.184005	-0.223341	-0.260563	-0.299158	-0.335888	-0.369016	-0.399288	-0.429667	-0.461573	-0.493746	-0.524111	-0.550358	-0.568522	-0.582132	-0.590132	-0.588377	-0.576628
0.678294	0.705363	0.866918	0.775509	0.616267	0.362095	0.180427	0.125798	0.0463154	0.0157064	-0.00269971	-0.00184349	0.00452965	0.00910679	0.0150108	0.0148929	0.00649888	-0.00436232	-0.00929674	-0.0116461	-0.00379142	0.00896175	0.018329	0.0251936	0.0292183	0.0308101	0.0288315	0.0236547	0.0144784	0.000975725	-0.015196	-0.0384298	-0.0687018	-0.105117	-0.146525	-0.194486	-0.248569	-0.311018	-0.377271	-0.443682	-0.512341	-0.58033	-0.649097	-0.718195	-0.785786	-0.844579	-0.895448	-0.929288	-0.940488	-0.92639
1.32734	1.71157	1.59124	0.750409	0.0848899	-0.125406	-0.141672	-0.0352237	0.105388	0.249489	0.42085	0.581858	0.703085	0.746965	0.698476	0.585106	0.444428	0.306463	0.189097	0.10303	0.0454097	0.00943094	-0.0138328	-0.0238151	-0.0225847	-0.01255	0.00394493	0.0231342	0.0423182	0.0608171	0.0746235	0.0792485	0.0724229	0.0529088	0.0192694	-0.026917	-0.0852049	-0.154185	-0.225254	-0.296541	-0.350206	-0.389268	-0.424961	-0.467982	-0.521307	-0.584244	-0.655956	-0.723883	-0.757772	-0.754113
0.75801	0.992628	0.872695	0.555449	0.384191	0.37485	0.398771	0.359127	0.373657	0.427405	0.446277	0.421502	0.408799	0.403571	0.396979	0.387617	0.371869	0.342761	0.295001	0.230726	0.157206	0.0851077	0.0235601	-0.0236751	-0.0523994	-0.0658442	-0.0635404	-0.0473837	-0.0234675	-0.000278134	0.0134098	0.0112004	-0.00537221	-0.0362747	-0.0791074	-0.133185	-0.195957	-0.264518	-0.335348	-0.402604	-0.464612	-0.519236	-0.563689	-0.614934	-0.663395	-0.696542	-0.738324	-0.768814	-0.81137	-0.858997
0.280292	0.582714	0.614207	0.39871	0.725142	0.690134	0.508687	0.43655	0.310455	0.170235	0.0913546	0.0586918	0.0736215	0.11602	0.166841	0.194678	0.152295	0.0459419	-0.0771206	-0.170237	-0.216042	-0.218251	-0.18529	-0.135802	-0.087138	-0.0518803	-0.0398311	-0.0568086	-0.102178	-0.161345	-0.227446	-0.298898	-0.369373	-0.440285	-0.513807	-0.583048	-0.643821	-0.695847	-0.737464	-0.77258	-0.808675	-0.852946	-0.909884	-0.981721	-1.06632	-1.14787	-1.20762	-1.23022	-1.20127	-1.11422
0.445182	0.509858	0.749693	0.90914	0.761484	0.704897	0.563549	0.390411	0.27227	0.220863	0.186164	0.156997	0.160508	0.165314	0.159223	0.138779	0.114609	0.0991997	0.0917749	0.0859096	0.0736534	0.0521203	0.0315649	0.0135962	-0.00337261	-0.020319	-0.036528	-0.0521086	-0.0692967	-0.0889673	-0.111202	-0.137326	-0.167456	-0.202919	-0.241278	-0.285996	-0.331154	-0.379198	-0.433588	-0.496041	-0.561608	-0.630183	-0.70246	-0.771644	-0.838879	-0.90069	-0.952548	-0.991589	-1.01355	-1.01061
0.459091	0.654103	0.7981	0.812937	0.440533	0.290903	0.22671	0.164973	0.170294	0.237242	0.251192	0.243977	0.215102	0.190171	0.167054	0.152645	0.132763	0.103943	0.0762892	0.052987	0.0326194	0.0147723	0.00208034	-0.00490685	-0.0119966	-0.0200542	-0.0313704	-0.0429857	-0.0564152	-0.0740135	-0.0917785	-0.113167	-0.138961	-0.170595	-0.206744	-0.245901	-0.288974	-0.3339	-0.383033	-0.433546	-0.485945	-0.543234	-0.611878	-0.688008	-0.76668	-0.840089	-0.90136	-0.946039	-0.962952	-0.952869
0.762677	0.754792	0.662107	0.635496	0.302984	0.193896	0.149463	0.153873	0.203937	0.264418	0.330941	0.36725	0.375505	0.36922	0.352629	0.33427	0.320493	0.311349	0.298007	0.281681	0.26411	0.249044	0.235776	0.219975	0.196302	0.168272	0.135232	0.0984076	0.0590105	0.0210487	-0.0112756	-0.0396766	-0.0708386	-0.103553	-0.13734	-0.171936	-0.206815	-0.249547	-0.301515	-0.357788	-0.417632	-0.479717	-0.544065	-0.609032	-0.668827	-0.713952	-0.743857	-0.75375	-0.737518	-0.686698
0.829128	1.2388	0.86656	0.485556	0.423003	0.433231	0.379702	0.305345	0.301636	0.306651	0.298345	0.296841	0.301481	0.311113	0.308544	0.300888	0.283953	0.259138	0.226989	0.192824	0.161907	0.137095	0.114243	0.0904718	0.0614892	0.0277251	-0.00524998	-0.0359463	-0.0634048	-0.0865995	-0.111705	-0.1396	-0.166548	-0.191156	-0.218466	-0.248533	-0.280613	-0.31385	-0.349932	-0.389624	-0.435919	-0.491145	-0.556021	-0.626868	-0.701942	-0.773998	-0.832301	-0.86926	-0.880136	-0.853739
0.801292	0.83611	0.538794	0.42348	0.352498	0.311697	0.205896	0.17655	0.210124	0.228417	0.209037	0.162521	0.12273	0.110093	0.111067	0.115233	0.108206	0.0904183	0.0644906	0.0361368	0.0104504	-0.0148416	-0.036337	-0.0580915	-0.0786357	-0.0980069	-0.113926	-0.127523	-0.134528	-0.137278	-0.144081	-0.161221	-0.190079	-0.229299	-0.281284	-0.343135	-0.407681	-0.471362	-0.532778	-0.596614	-0.665029	-0.734176	-0.801017	-0.859332	-0.901975	-0.91959	-0.908442	-0.867704	-0.795589	-0.702807
0.51125	0.671839	0.605135	0.381285	0.323795	0.275961	0.136096	0.0620403	0.0500289	0.0425955	0.0511898	0.0639908	0.0701584	0.0857072	0.0810395	0.0639632	0.038915	0.012008	-0.0138277	-0.0368884	-0.056267	-0.0701337	-0.0813243	-0.0866407	-0.0915433	-0.101774	-0.118475	-0.141294	-0.171693	-0.202438	-0.232546	-0.261717	-0.288232	-0.310593	-0.330846	-0.347163	-0.362804	-0.377688	-0.392301	-0.413381	-0.446387	-0.490115	-0.544437	-0.610803	-0.682273	-0.746314	-0.793546	-0.81432	-0.80307	-0.730915
0.463785	1.04481	1.33783	0.771597	0.300954	0.251785	0.0735824	-0.149624	-0.240102	-0.300977	-0.349721	-0.330415	-0.287625	-0.250158	-0.231332	-0.217067	-0.20918	-0.210617	-0.218889	-0.232327	-0.250584	-0.272641	-0.299068	-0.324134	-0.350243	-0.369508	-0.370608	-0.356094	-0.34197	-0.332519	-0.322908	-0.312518	-0.31439	-0.306752	-0.295952	-0.288125	-0.282042	-0.285378	-0.322081	-0.331808	-0.34209	-0.353352	-0.360786	-0.36337	-0.362199	-0.360791	-0.359359	-0.355709	-0.345547	-0.32356
0.270169	0.469691	1.04509	1.03298	1.20595	1.43725	1.25266	0.486601	-0.207917	-0.431926	-0.185819	0.232735	0.52136	0.671906	0.686159	0.595399	0.442097	0.231112	0.00602364	-0.0956027	-0.088512	-0.0103988	0.0813903	0.156789	0.150762	0.0928145	0.039592	-0.0168775	-0.0666678	-0.0709575	-0.0430623	-0.0241712	-0.0501969	-0.114904	-0.135954	-0.17563	-0.133875	-0.186084	-0.371353	-0.431744	-0.478074	-0.512125	-0.469007	-0.498264	-0.557309	-0.63126	-0.685292	-0.698297	-0.759549	-0.854776
0.481131	0.88972	1.07739	0.808764	0.593195	0.503789	0.292868	0.134157	0.0938923	0.0882266	0.104477	0.150285	0.206147	0.24191	0.228642	0.162219	0.0800198	0.0120324	-0.036814	-0.0718805	-0.0964249	-0.112016	-0.120887	-0.126882	-0.131437	-0.135982	-0.142148	-0.151897	-0.168708	-0.189642	-0.213667	-0.240887	-0.270446	-0.301889	-0.334683	-0.371443	-0.411182	-0.45162	-0.491634	-0.530637	-0.571999	-0.617587	-0.672055	-0.732456	-0.799434	-0.867614	-0.927547	-0.978631	-1.01474	-1.02853
0.396669	0.769451	1.07359	0.86668	0.85083	0.633763	0.52152	0.51059	0.501044	0.529021	0.585953	0.649713	0.679384	0.692384	0.682644	0.650927	0.60131	0.540766	0.477969	0.418654	0.363474	0.313164	0.268776	0.228294	0.191343	0.162077	0.142092	0.129422	0.120615	0.111665	0.098821	0.0822305	0.0628228	0.0387266	0.00891986	-0.0244304	-0.0614779	-0.106761	-0.154487	-0.201337	-0.247646	-0.295091	-0.341322	-0.386651	-0.433347	-0.480693	-0.529896	-0.579811	-0.627048	-0.667586
0.291837	0.616094	0.932577	0.906103	0.663708	0.496266	0.422108	0.293122	0.185094	0.144822	0.146468	0.162894	0.184775	0.204315	0.215658	0.227415	0.233446	0.230434	0.215282	0.193105	0.166351	0.133804	0.100536	0.0714956	0.0463295	0.0272873	0.012465	-0.00106239	-0.016905	-0.0396006	-0.0715554	-0.112482	-0.156237	-0.200563	-0.245236	-0.291481	-0.338102	-0.384658	-0.432471	-0.482899	-0.53787	-0.596498	-0.65918	-0.723688	-0.787455	-0.843823	-0.887817	-0.917949	-0.928788	-0.904825
0.475631	0.795559	0.729664	0.346614	0.15319	0.113454	0.00258178	-0.297795	-0.641072	-0.870767	-1.02971	-1.08642	-1.05367	-0.969777	-0.868198	-0.764347	-0.654673	-0.54534	-0.458698	-0.403025	-0.372202	-0.367816	-0.380564	-0.398563	-0.419552	-0.435135	-0.438049	-0.431552	-0.421221	-0.39914	-0.368343	-0.328133	-0.282309	-0.24501	-0.238863	-0.263524	-0.313922	-0.38515	-0.475154	-0.579253	-0.684416	-0.781383	-0.860915	-0.91448	-0.949307	-0.963135	-0.952555	-0.91442	-0.843823	-0.732627
0.543975	0.756878	0.818684	0.623222	0.383691	0.327153	0.269316	0.197531	0.141674	0.121379	0.131581	0.165961	0.200929	0.21994	0.205238	0.178078	0.150453	0.123906	0.100162	0.080029	0.0614174	0.0410197	0.0180254	-0.00285962	-0.0209815	-0.0375922	-0.0536054	-0.0700803	-0.088407	-0.107964	-0.13028	-0.156948	-0.187162	-0.220469	-0.256636	-0.297957	-0.34233	-0.392209	-0.443098	-0.498086	-0.561806	-0.629048	-0.699815	-0.769239	-0.83441	-0.889771	-0.929744	-0.947664	-0.936659	-0.878707
0.408157	1.12657	1.66515	1.26766	0.648623	0.510991	0.655621	0.484623	0.312321	0.307023	0.294706	0.273308	0.25876	0.239	0.218725	0.194789	0.17517	0.152967	0.122144	0.0848199	0.050491	0.0202302	-0.00699966	-0.0261508	-0.0368233	-0.0436277	-0.0499174	-0.0585963	-0.0705005	-0.086734	-0.103954	-0.121336	-0.139865	-0.160748	-0.183536	-0.210179	-0.242336	-0.282436	-0.332468	-0.389298	-0.446966	-0.50977	-0.573803	-0.64145	-0.713016	-0.790052	-0.867176	-0.93705	-0.988641	-1.00615
0.277409	0.545553	1.01035	0.561259	0.190189	0.197246	0.0895408	-0.07926	-0.103828	-0.0997269	-0.10108	-0.0615084	0.000189131	0.044767	0.0488839	0.0278031	-0.0113536	-0.0448442	-0.0701936	-0.0890947	-0.103603	-0.116362	-0.129546	-0.148891	-0.170319	-0.191276	-0.211745	-0.233372	-0.256755	-0.279429	-0.3004	-0.321411	-0.343894	-0.366165	-0.387257	-0.404441	-0.42025	-0.440387	-0.469025	-0.508311	-0.556157	-0.616433	-0.690455	-0.769391	-0.853245	-0.937292	-1.01565	-1.07942	-1.12323	-1.14108
0.267295	0.384563	0.48288	0.357119	0.170438	0.106912	0.0637086	0.0258876	0.00109873	0.0263617	0.0449219	0.0635474	0.066739	0.0638194	0.0563115	0.045986	0.0322372	0.0133798	-0.00513223	-0.019089	-0.0315499	-0.0411365	-0.0480444	-0.052443	-0.055922	-0.0596786	-0.0640537	-0.0719246	-0.0845924	-0.104087	-0.127683	-0.154122	-0.180411	-0.206517	-0.234189	-0.262308	-0.289981	-0.315826	-0.340027	-0.364735	-0.389191	-0.416764	-0.449656	-0.486998	-0.530211	-0.57942	-0.630887	-0.680505	-0.725104	-0.760443
0.506552	0.547012	0.942528	1.29442	1.2258	0.821828	0.626461	0.512163	0.331297	0.232919	0.199174	0.188741	0.180163	0.175806	0.158757	0.138025	0.122381	0.10507	0.0862113	0.0687062	0.0561061	0.0450342	0.0352356	0.0284913	0.0225499	0.013658	0.00110314	-0.0162301	-0.0372433	-0.0607837	-0.0851652	-0.112441	-0.140244	-0.168863	-0.200261	-0.233739	-0.268209	-0.310751	-0.360762	-0.422278	-0.485646	-0.549148	-0.614895	-0.6824	-0.755732	-0.82604	-0.884412	-0.919595	-0.929914	-0.90761
0.538356	1.13247	1.3348	1.04313	0.712241	0.515194	0.399876	0.304978	0.15157	0.138728	0.185765	0.24364	0.275627	0.278485	0.285283	0.285353	0.272734	0.269987	0.261108	0.23887	0.209896	0.173803	0.135137	0.0971846	0.0615599	0.0299319	0.000869785	-0.0262449	-0.0506105	-0.0727079	-0.0897062	-0.100135	-0.100437	-0.0966616	-0.100535	-0.120729	-0.153558	-0.197851	-0.258321	-0.333853	-0.423918	-0.526729	-0.640964	-0.761564	-0.884852	-0.996395	-1.08332	-1.13508	-1.14331	-1.10613
0.452447	0.690854	0.755738	0.396756	0.270112	0.313008	0.335266	0.325314	0.258881	0.230905	0.239768	0.259422	0.26633	0.241805	0.202584	0.182595	0.158502	0.130265	0.099406	0.0671253	0.0349667	0.00387922	-0.0232682	-0.0407007	-0.0504961	-0.0612176	-0.0732197	-0.0817384	-0.0913766	-0.103589	-0.117089	-0.134839	-0.161996	-0.191362	-0.220757	-0.249995	-0.28474	-0.34357	-0.412369	-0.405716	-0.458936	-0.526547	-0.583026	-0.64484	-0.708439	-0.771557	-0.833713	-0.887767	-0.92039	-0.908203
0.577206	1.27237	1.11895	0.684529	0.691862	0.649497	0.54711	0.533455	0.565979	0.598623	0.596559	0.585959	0.561372	0.5169	0.468397	0.411355	0.352455	0.295836	0.238384	0.186449	0.14817	0.126425	0.116838	0.113537	0.110204	0.103993	0.0936848	0.0784849	0.0593492	0.0357596	0.00607242	-0.0266201	-0.058721	-0.0869345	-0.113655	-0.13675	-0.160368	-0.191712	-0.230096	-0.273343	-0.323067	-0.380857	-0.449132	-0.529207	-0.620185	-0.718008	-0.816215	-0.904282	-0.966635	-0.982879
0.36782	0.858182	0.81858	0.613089	0.310622	0.263153	0.227563	0.12021	0.0900064	0.0625778	0.0926999	0.121712	0.1464	0.147426	0.131527	0.106277	0.0813377	0.0593854	0.037886	0.0125987	-0.0124808	-0.034427	-0.0523359	-0.0655975	-0.0782674	-0.0920863	-0.10712	-0.122972	-0.139623	-0.158801	-0.181891	-0.206577	-0.230513	-0.256383	-0.285348	-0.314432	-0.341176	-0.371522	-0.41096	-0.461458	-0.521903	-0.592148	-0.669631	-0.752205	-0.838888	-0.923488	-0.999102	-1.05523	-1.08427	-1.07915
0.462437	1.16337	0.736362	0.567401	0.539608	0.411558	0.33257	0.338084	0.324728	0.326757	0.353182	0.375648	0.380333	0.364963	0.334001	0.295966	0.26167	0.225395	0.191899	0.162858	0.13742	0.114413	0.0917786	0.0707422	0.0492136	0.0277584	0.00723366	-0.0123464	-0.0312491	-0.0510324	-0.0727824	-0.0969295	-0.125022	-0.155819	-0.190094	-0.228043	-0.268164	-0.309729	-0.351583	-0.396343	-0.446706	-0.506211	-0.575198	-0.652125	-0.733073	-0.819827	-0.902849	-0.972333	-1.018	-1.03662
0.525386	0.77117	1.14187	1.1205	0.815122	0.673521	0.772229	0.702337	0.634168	0.630443	0.671683	0.667351	0.607701	0.520237	0.442283	0.383036	0.3284	0.292763	0.280474	0.28139	0.284948	0.280209	0.259443	0.224014	0.190375	0.179868	0.185916	0.17441	0.108401	-0.00353281	-0.0726096	-0.0458489	-0.0379447	-0.0904071	-0.162627	-0.216707	-0.250953	-0.297214	-0.363398	-0.434792	-0.506966	-0.57855	-0.642411	-0.703007	-0.77511	-0.859063	-0.945111	-1.02392	-1.08524	-1.12181
0.460802	0.654913	0.92916	0.626921	0.227747	0.107081	-0.0321663	-0.0901071	-0.0559787	0.0105177	0.0895007	0.128157	0.130313	0.124828	0.118408	0.113454	0.0925522	0.0639621	0.0449441	0.0349542	0.028628	0.0189111	0.010421	0.00426461	-0.00107081	-0.00663435	-0.0188479	-0.0292506	-0.0453003	-0.06569	-0.0894971	-0.122428	-0.154904	-0.185839	-0.219432	-0.253063	-0.282716	-0.314118	-0.347482	-0.379522	-0.410799	-0.441981	-0.475467	-0.51424	-0.564101	-0.630558	-0.709245	-0.787286	-0.851955	-0.893598
0.255169	0.308133	1.0288	1.18216	0.598542	0.29731	0.510116	0.604825	0.519213	0.460883	0.435396	0.429505	0.411747	0.393276	0.375684	0.336863	0.270059	0.193986	0.124811	0.0767569	0.0416997	0.0110737	-0.0145465	-0.0341809	-0.0515183	-0.0729994	-0.0898815	-0.100069	-0.111692	-0.124083	-0.136781	-0.150981	-0.167102	-0.173279	-0.162959	-0.210259	-0.269572	-0.303914	-0.342583	-0.386665	-0.435531	-0.488008	-0.547718	-0.616731	-0.69687	-0.787037	-0.882368	-0.970603	-1.04069	-1.08195
0.472224	0.513445	0.753373	0.835027	0.558398	0.455121	0.407715	0.290002	0.236897	0.229884	0.265593	0.275367	0.283459	0.314719	0.343529	0.353528	0.356148	0.356852	0.35148	0.339678	0.327171	0.313576	0.296682	0.281502	0.268844	0.257336	0.246414	0.236668	0.22726	0.216662	0.204047	0.18823	0.16969	0.147805	0.126452	0.105577	0.0800299	0.0512452	0.0236735	-0.00224077	-0.0293672	-0.0586495	-0.0912002	-0.129043	-0.173716	-0.222048	-0.270361	-0.313144	-0.340405	-0.342682
0.387225	0.678768	1.04924	0.796687	0.431882	0.401241	0.506762	0.489654	0.439846	0.460314	0.463986	0.466162	0.47178	0.452955	0.42157	0.386101	0.348289	0.314607	0.289745	0.271147	0.253179	0.231664	0.202501	0.165109	0.128795	0.10175	0.080064	0.0587638	0.0372195	0.0149797	-0.00594746	-0.0262395	-0.0488057	-0.0740093	-0.101539	-0.132022	-0.165975	-0.202147	-0.241042	-0.284331	-0.330928	-0.382884	-0.436867	-0.49413	-0.55156	-0.614556	-0.681614	-0.750345	-0.815685	-0.873423
0.223291	0.258117	0.44521	0.64269	0.564323	0.413621	0.445095	0.424985	0.270853	0.106714	-0.00087816	0.00316064	0.0364752	0.123304	0.164048	0.106833	0.088241	0.0795427	0.0432081	0.017695	-0.0181506	-0.0438596	-0.0533024	-0.0440343	-0.0397861	-0.0691374	-0.111654	-0.146562	-0.158	-0.143042	-0.141046	-0.171165	-0.180559	-0.180369	-0.200626	-0.216148	-0.238249	-0.273384	-0.311581	-0.352808	-0.376759	-0.401406	-0.469842	-0.53304	-0.616496	-0.705273	-0.728339	-0.767695	-0.830066	-0.865416
0.355503	0.644681	0.965395	0.743483	0.460365	0.34348	0.22092	0.0897986	0.0384712	-0.00684522	-0.0115905	-0.00089782	0.0047463	0.0129898	0.0183586	0.0139124	-0.00268523	-0.0325919	-0.0686447	-0.104441	-0.135451	-0.158213	-0.170571	-0.176292	-0.181302	-0.189659	-0.19943	-0.210891	-0.226538	-0.242248	-0.256075	-0.266899	-0.276223	-0.285791	-0.299392	-0.317961	-0.342131	-0.370166	-0.402781	-0.440058	-0.479609	-0.519883	-0.559352	-0.601542	-0.651555	-0.711137	-0.775353	-0.840813	-0.900986	-0.948762
0.602046	0.83647	1.02817	0.984238	0.711074	0.508722	0.505751	0.487689	0.40074	0.383043	0.396729	0.404976	0.402	0.393002	0.385844	0.365559	0.331113	0.28803	0.245951	0.21155	0.184551	0.163359	0.145812	0.129964	0.11263	0.0935404	0.0711308	0.0488883	0.0280901	0.00463712	-0.0188021	-0.0399673	-0.0589283	-0.0750545	-0.0896244	-0.10522	-0.12255	-0.143039	-0.171099	-0.206244	-0.24726	-0.296345	-0.350826	-0.411102	-0.473773	-0.532114	-0.582316	-0.616342	-0.629138	-0.635176
0.352604	0.827672	1.26718	0.882667	0.388402	0.27217	0.30989	0.278384	0.240178	0.188127	0.190548	0.232272	0.237865	0.205882	0.142495	0.0762812	0.0332127	0.00884671	-0.0156319	-0.0490722	-0.0862144	-0.118784	-0.141351	-0.152077	-0.153134	-0.151154	-0.152335	-0.162309	-0.181886	-0.203711	-0.223441	-0.239821	-0.253451	-0.268141	-0.286586	-0.30923	-0.335245	-0.363921	-0.395495	-0.432783	-0.477024	-0.527155	-0.587089	-0.658472	-0.734987	-0.810552	-0.88961	-0.97691	-1.0693	-1.15121
0.639736	0.839014	1.13292	1.06012	0.757246	0.497176	0.303598	0.216435	0.135385	0.106561	0.141302	0.194232	0.24301	0.269573	0.284659	0.275491	0.238499	0.185629	0.127432	0.0728433	0.0276144	-0.00523759	-0.0281568	-0.0430795	-0.0541192	-0.0597616	-0.0601356	-0.063697	-0.0813033	-0.111688	-0.150775	-0.197173	-0.244407	-0.284483	-0.318443	-0.346845	-0.3723	-0.39407	-0.408456	-0.422622	-0.447109	-0.486452	-0.538892	-0.607624	-0.689287	-0.77354	-0.85651	-0.933027	-0.992549	-1.03136
0.145624	0.209962	0.284633	0.333566	0.103986	-0.100932	0.0550133	0.0451861	-0.0363583	-0.0240751	-0.0311576	-0.0266988	-0.0302284	-0.0365268	-0.0351729	-0.0456737	-0.0592875	-0.0791699	-0.112945	-0.156819	-0.204538	-0.243219	-0.271392	-0.290853	-0.306247	-0.32044	-0.333454	-0.34552	-0.356082	-0.368159	-0.38486	-0.408932	-0.436912	-0.460261	-0.480187	-0.497131	-0.508978	-0.518274	-0.530498	-0.549517	-0.575663	-0.611253	-0.653553	-0.701956	-0.761366	-0.832881	-0.911996	-0.995167	-1.0704	-1.12684
0.496538	0.553221	0.749104	0.606318	0.15907	0.0654899	0.139663	0.0774087	0.00723461	0.0566775	0.141087	0.145438	0.11259	0.0477553	-0.0353923	-0.0995099	-0.143494	-0.163692	-0.167591	-0.169829	-0.181203	-0.208992	-0.252687	-0.30127	-0.339837	-0.362321	-0.370064	-0.366408	-0.35736	-0.348319	-0.347	-0.357233	-0.380733	-0.415285	-0.458361	-0.505712	-0.555305	-0.607778	-0.663273	-0.722727	-0.784833	-0.850515	-0.919348	-0.993994	-1.0726	-1.14731	-1.21399	-1.26879	-1.30703	-1.32178
0.203759	0.0945957	0.0540908	0.304649	0.540281	0.610424	0.60573	0.5497	0.284359	-0.0126855	-0.025777	0.0815225	0.168752	0.187098	0.166322	0.19066	0.161651	0.113872	0.0544189	-0.0197425	-0.0517381	-0.0640574	-0.0179406	0.000293908	-0.0238134	-0.0539193	-0.0860515	-0.115352	-0.0675203	-0.0763827	-0.12485	-0.173767	-0.172816	-0.177978	-0.217306	-0.241627	-0.252728	-0.306739	-0.364367	-0.394112	-0.431986	-0.494897	-0.560699	-0.629069	-0.68107	-0.721765	-0.782583	-0.823619	-0.853815	-0.870183
0.185532	0.368928	0.331307	0.129806	0.0447872	0.597114	0.783659	0.635716	0.389232	0.204347	0.18306	0.24454	0.320958	0.394461	0.363793	0.253421	0.138008	0.0661805	0.0904859	0.15313	0.180601	0.157929	0.109503	0.0355314	-0.0255326	-0.0518976	-0.0642233	-0.0530068	-0.038047	-0.056277	-0.110157	-0.151508	-0.152452	-0.16983	-0.193357	-0.167523	-0.168163	-0.205025	-0.284037	-0.394232	-0.485135	-0.528765	-0.530626	-0.537903	-0.587798	-0.675678	-0.75646	-0.821376	-0.873148	-0.944465
0.309362	0.381673	0.723539	1.06544	1.0183	0.848374	0.76298	0.673455	0.460686	0.371963	0.338563	0.352805	0.384961	0.405505	0.411265	0.393914	0.34398	0.268685	0.183788	0.119293	0.0795089	0.0598215	0.0536683	0.0521748	0.0451125	0.0320296	0.0191931	0.00810309	-0.00454476	-0.0241188	-0.0492144	-0.0772826	-0.107049	-0.135473	-0.158559	-0.178764	-0.20141	-0.225132	-0.248248	-0.268978	-0.285252	-0.294157	-0.305573	-0.329055	-0.368675	-0.42769	-0.50703	-0.59913	-0.692071	-0.77549
0.408169	0.670405	0.896508	0.586134	0.249291	0.282986	0.320828	0.186576	0.130047	0.13642	0.115211	0.138729	0.180831	0.185794	0.169548	0.145448	0.116114	0.0759795	0.0292746	-0.0134323	-0.0572838	-0.103639	-0.141958	-0.171563	-0.197015	-0.220618	-0.243656	-0.266679	-0.289902	-0.315914	-0.345439	-0.373455	-0.393492	-0.404446	-0.411134	-0.420128	-0.431889	-0.449652	-0.480472	-0.525781	-0.587752	-0.664915	-0.754963	-0.858236	-0.96704	-1.06963	-1.1548	-1.21075	-1.23441	-1.21981
0.339112	0.443587	0.926817	1.1916	0.874753	0.681524	0.631128	0.568044	0.416419	0.306168	0.267747	0.257908	0.273706	0.2745	0.256656	0.212024	0.157413	0.09868	0.0475167	0.00969998	-0.0191048	-0.040418	-0.0519916	-0.0591463	-0.0670275	-0.081012	-0.102176	-0.121657	-0.140464	-0.160522	-0.183323	-0.21036	-0.240473	-0.269391	-0.298507	-0.326052	-0.356968	-0.388749	-0.422902	-0.460595	-0.502726	-0.550004	-0.603665	-0.66296	-0.729306	-0.805503	-0.885361	-0.959631	-1.01861	-1.0549
0.596935	0.91192	1.43612	0.957354	0.39456	0.44884	0.453353	0.350347	0.320709	0.321346	0.359479	0.392503	0.377368	0.330589	0.273922	0.219263	0.16959	0.122422	0.0732834	0.0163622	-0.0367852	-0.0711762	-0.0862218	-0.0941382	-0.104873	-0.119869	-0.136041	-0.150987	-0.165596	-0.183314	-0.202009	-0.224842	-0.255312	-0.287831	-0.320261	-0.353596	-0.392566	-0.435791	-0.478224	-0.523169	-0.572182	-0.628966	-0.694105	-0.773532	-0.87141	-0.982257	-1.096	-1.19868	-1.27877	-1.32591
0.30026	0.511549	0.971755	0.822327	0.5494	0.590365	0.492848	0.351465	0.263143	0.246099	0.284591	0.34337	0.397104	0.433201	0.440313	0.421691	0.386998	0.352622	0.31754	0.279647	0.241919	0.205995	0.172457	0.141545	0.109618	0.0822387	0.0633232	0.0483365	0.0351141	0.0212813	0.00425235	-0.0176755	-0.0419471	-0.069688	-0.100355	-0.132922	-0.166755	-0.199929	-0.227478	-0.251947	-0.278576	-0.310507	-0.349565	-0.397874	-0.449784	-0.507586	-0.568542	-0.630669	-0.690854	-0.743904
[truncated: 11 more columns]

## Sheet: 2
0.2639	0.321266	0.390374	0.459182	0.518002	0.553823	0.558527	0.541095	0.507538	0.466309	0.421904	0.374944	0.326676	0.27898	0.233045	0.189676	0.148692	0.110552	0.0716727	0.0359384	0.0052596	-0.0186909	-0.0387111	-0.0557081	-0.0740121	-0.0968657	-0.117253	-0.128418	-0.128093	-0.121042	-0.117209	-0.120648	-0.132669	-0.151667	-0.178178	-0.207985	-0.243373	-0.284343	-0.33111	-0.374791	-0.414426	-0.448539	-0.47713	-0.503889	-0.533011	-0.561464	-0.585655	-0.601943	-0.611821	-0.617017
0.3774	0.440855	0.492259	0.525102	0.535877	0.52576	0.509663	0.490837	0.466688	0.433433	0.389001	0.336942	0.28365	0.232087	0.183358	0.138995	0.101198	0.0710057	0.0458582	0.0221051	-0.00378788	-0.0331745	-0.0625511	-0.0894638	-0.112388	-0.127032	-0.132329	-0.134338	-0.137737	-0.143837	-0.152452	-0.166174	-0.188624	-0.220853	-0.2647	-0.31767	-0.376811	-0.440006	-0.505382	-0.569748	-0.632124	-0.692815	-0.749787	-0.798381	-0.836004	-0.859927	-0.867362	-0.85987	-0.840114	-0.810894
0.0774286	0.16411	0.252035	0.325079	0.372565	0.3916	0.388915	0.373863	0.351813	0.327644	0.304028	0.282585	0.262545	0.241099	0.216937	0.190657	0.166293	0.146345	0.131041	0.11942	0.109413	0.100395	0.0934875	0.0909363	0.0927137	0.0966013	0.0993849	0.0962412	0.0885929	0.0788027	0.0716339	0.0682334	0.0643855	0.0575646	0.0464263	0.031383	0.0128237	-0.00948712	-0.0378293	-0.0732696	-0.114546	-0.159078	-0.204417	-0.248219	-0.283608	-0.309922	-0.327144	-0.337303	-0.344954	-0.351904
0.203574	0.299276	0.375504	0.425976	0.4447	0.429537	0.395792	0.354557	0.310222	0.271	0.240688	0.219652	0.20748	0.199938	0.189547	0.173345	0.146698	0.111177	0.0714888	0.0339518	0.0059841	-0.00962394	-0.0136248	-0.00910714	-0.000148535	0.00865027	0.0119348	0.00548286	-0.0102649	-0.032459	-0.0598828	-0.0896735	-0.117521	-0.143005	-0.164895	-0.186464	-0.210463	-0.238272	-0.272074	-0.31067	-0.355392	-0.406447	-0.466728	-0.532526	-0.595723	-0.646736	-0.679319	-0.692846	-0.687549	-0.667435
0.498091	0.651683	0.790152	0.889529	0.944123	0.963358	0.956643	0.924377	0.869535	0.804446	0.743866	0.695707	0.654923	0.614202	0.572051	0.526413	0.476399	0.425652	0.37255	0.322628	0.283932	0.260252	0.250348	0.245469	0.236532	0.222795	0.20953	0.199099	0.185873	0.164791	0.140948	0.12304	0.113829	0.107242	0.0960909	0.0791405	0.0557025	0.0231382	-0.0178407	-0.0651061	-0.118899	-0.174384	-0.225902	-0.272079	-0.318429	-0.369562	-0.425228	-0.473577	-0.49864	-0.495126
0.173953	0.242431	0.309787	0.364963	0.401957	0.420858	0.42576	0.42022	0.40675	0.383723	0.351513	0.312488	0.271581	0.231064	0.19149	0.155127	0.12392	0.0984928	0.0778901	0.0597144	0.0433056	0.0256427	0.00476744	-0.0171882	-0.0360655	-0.0491966	-0.0565466	-0.0609958	-0.0669824	-0.0759448	-0.0880698	-0.104164	-0.127397	-0.158209	-0.198978	-0.246991	-0.298347	-0.349953	-0.399529	-0.445004	-0.48611	-0.522683	-0.555228	-0.5843	-0.611382	-0.638412	-0.663987	-0.684921	-0.699524	-0.703537
0.0945	0.138348	0.191197	0.246333	0.29899	0.346247	0.387545	0.41898	0.435172	0.440636	0.44303	0.439222	0.427394	0.413955	0.399106	0.385576	0.376763	0.364333	0.344318	0.323859	0.304899	0.282727	0.259556	0.238899	0.222576	0.211419	0.213167	0.220773	0.228056	0.232859	0.23103	0.22304	0.209545	0.189333	0.165359	0.14447	0.128364	0.126975	0.105232	0.086197	0.0708687	0.0423485	0.00921212	-0.017803	-0.0788889	-0.124864	-0.143495	-0.205576	-0.26053	-0.306505
0.0800192	0.125209	0.177019	0.221027	0.247828	0.257137	0.249636	0.231868	0.212034	0.196579	0.187153	0.18313	0.181726	0.176093	0.159102	0.130231	0.093771	0.0562665	0.0261783	0.00835703	0.00215773	0.00560956	0.0125406	0.0155408	0.0110909	-0.000683178	-0.0166257	-0.0330717	-0.0478413	-0.0595394	-0.067799	-0.0729924	-0.077818	-0.0858718	-0.0997453	-0.119999	-0.145049	-0.173486	-0.201566	-0.225695	-0.245289	-0.26045	-0.274241	-0.289357	-0.30725	-0.327813	-0.34828	-0.368362	-0.387691	-0.399716
0.256672	0.313485	0.359139	0.392187	0.404443	0.40165	0.392263	0.378789	0.360813	0.33767	0.308013	0.274755	0.241082	0.207564	0.1732	0.133874	0.0918349	0.050145	0.0142714	-0.0129276	-0.0310921	-0.0433044	-0.0538541	-0.0673291	-0.0861918	-0.108695	-0.131428	-0.149837	-0.16164	-0.171398	-0.183743	-0.200343	-0.220763	-0.244358	-0.271043	-0.301148	-0.33736	-0.380569	-0.429178	-0.480315	-0.530061	-0.576221	-0.615663	-0.647866	-0.67229	-0.691322	-0.705584	-0.716379	-0.720916	-0.715309
0.297857	0.391022	0.467195	0.520468	0.559078	0.577602	0.566775	0.526261	0.469351	0.415987	0.375013	0.340016	0.319009	0.295784	0.265527	0.224069	0.187172	0.156948	0.126455	0.0886349	0.0455166	0.0075671	-0.020619	-0.0498961	-0.0814286	-0.102743	-0.115447	-0.107558	-0.103665	-0.128681	-0.172468	-0.202631	-0.225983	-0.244095	-0.266304	-0.2997	-0.337714	-0.374405	-0.406654	-0.442706	-0.489742	-0.541276	-0.587887	-0.624831	-0.64981	-0.669727	-0.693928	-0.718385	-0.724026	-0.697983
0.175333	0.316195	0.469416	0.608662	0.710569	0.756124	0.739013	0.682766	0.618132	0.564896	0.52847	0.50594	0.48815	0.471858	0.457589	0.442758	0.419213	0.383117	0.335761	0.285276	0.241617	0.208278	0.185692	0.174573	0.173918	0.180886	0.190119	0.196119	0.192976	0.178326	0.155861	0.132089	0.11062	0.0914583	0.0736526	0.0553742	0.0358428	0.0153548	-0.00894003	-0.0392683	-0.0769432	-0.120846	-0.168528	-0.21575	-0.258701	-0.295634	-0.327926	-0.358371	-0.387003	-0.414653
0.379969	0.514015	0.654676	0.782194	0.865227	0.87624	0.852027	0.807742	0.762898	0.729707	0.703201	0.675226	0.636569	0.592201	0.547042	0.502018	0.453173	0.398181	0.338452	0.279383	0.230345	0.195262	0.172007	0.154759	0.134871	0.108785	0.0768763	0.0464773	0.0248835	0.0127563	0.00583807	-0.00137405	-0.0132541	-0.0300937	-0.05347	-0.0839381	-0.12294	-0.169131	-0.224208	-0.285668	-0.349003	-0.414321	-0.476489	-0.532736	-0.581851	-0.62069	-0.646041	-0.659111	-0.668706	-0.675968
0.18475	0.175386	0.195452	0.228106	0.298859	0.404652	0.502811	0.542154	0.520374	0.488227	0.476348	0.471222	0.443227	0.388949	0.329227	0.271144	0.211924	0.154652	0.116386	0.0745909	0.0480808	0.0286439	0.00369444	-0.0195227	-0.0303333	-0.032346	-0.0385328	-0.0528636	-0.0625783	-0.0627753	-0.0601364	-0.0632626	-0.0707955	-0.0785833	-0.0906793	-0.112131	-0.139409	-0.170881	-0.213106	-0.259712	-0.299871	-0.334601	-0.377856	-0.43502	-0.491306	-0.553864	-0.615949	-0.674879	-0.724841	-0.757449
0.392794	0.513099	0.6173	0.68948	0.724547	0.729778	0.721666	0.711198	0.692184	0.655666	0.604241	0.547402	0.48966	0.427501	0.35393	0.270114	0.19153	0.128382	0.0841578	0.0569973	0.0412632	0.0309947	0.0228529	0.0165948	0.00800089	-0.00651367	-0.0257392	-0.0444866	-0.0584652	-0.067872	-0.0754991	-0.0805654	-0.0835808	-0.0903137	-0.108845	-0.142277	-0.189866	-0.247613	-0.306959	-0.361698	-0.409902	-0.45218	-0.488547	-0.519491	-0.548379	-0.579123	-0.611425	-0.640914	-0.657727	-0.651864
0.431122	0.499751	0.554736	0.58733	0.594472	0.579835	0.55299	0.523318	0.491886	0.455169	0.412351	0.367864	0.326322	0.288389	0.252096	0.216036	0.181572	0.149877	0.122341	0.0997859	0.079472	0.0564109	0.0280108	-0.0033523	-0.0309483	-0.0557226	-0.0788268	-0.0994457	-0.115168	-0.124843	-0.128042	-0.129255	-0.136768	-0.150195	-0.169529	-0.19601	-0.231395	-0.272481	-0.317114	-0.363959	-0.411879	-0.457947	-0.497904	-0.533531	-0.566745	-0.596967	-0.620808	-0.637239	-0.651825	-0.66579
0.217339	0.271901	0.342098	0.405218	0.444629	0.453925	0.440308	0.417717	0.392316	0.361874	0.325335	0.286386	0.250276	0.21902	0.18824	0.153972	0.1148	0.0742264	0.0386492	0.0126609	-0.00404398	-0.0170775	-0.0305844	-0.0453416	-0.0579563	-0.0656504	-0.0708293	-0.079315	-0.0932623	-0.109971	-0.126427	-0.143408	-0.164698	-0.193349	-0.229774	-0.270949	-0.313185	-0.354749	-0.395937	-0.437931	-0.481235	-0.524496	-0.565745	-0.602144	-0.631459	-0.654606	-0.673469	-0.689797	-0.701208	-0.701482
0.408476	0.46854	0.514287	0.543413	0.555394	0.555268	0.550997	0.54116	0.515206	0.47329	0.427116	0.38773	0.357612	0.330149	0.2966	0.256336	0.212572	0.171842	0.137658	0.10782	0.0821116	0.0579495	0.0365661	0.0213906	0.0113723	0.00492689	-0.00482876	-0.0196104	-0.0351823	-0.0474319	-0.0585455	-0.0682136	-0.0802073	-0.0955238	-0.110776	-0.133937	-0.167091	-0.208842	-0.253952	-0.29882	-0.342169	-0.382594	-0.421338	-0.46262	-0.506444	-0.548104	-0.581178	-0.602989	-0.613338	-0.608573
0.379323	0.464991	0.565254	0.659096	0.727199	0.752889	0.742381	0.713123	0.673723	0.623633	0.559844	0.489556	0.421233	0.363784	0.321196	0.289015	0.261521	0.23392	0.205613	0.180558	0.161524	0.147451	0.133857	0.115964	0.0925249	0.068871	0.0539443	0.0498856	0.0533848	0.0575865	0.05548	0.0443151	0.027741	0.00746237	-0.0204239	-0.0565663	-0.101161	-0.151591	-0.202759	-0.2513	-0.298754	-0.347159	-0.398212	-0.449874	-0.498659	-0.540581	-0.572209	-0.596379	-0.617217	-0.636702
0.3504	0.462477	0.553972	0.612605	0.636124	0.629024	0.602462	0.565649	0.522247	0.477822	0.437145	0.40429	0.37726	0.348828	0.314687	0.27449	0.232301	0.193871	0.163709	0.142733	0.12542	0.105295	0.0835007	0.0622626	0.0435826	0.0268537	0.00981562	-0.00839758	-0.0261609	-0.0399763	-0.0484295	-0.0568939	-0.072534	-0.0969644	-0.129283	-0.167083	-0.207856	-0.25003	-0.29375	-0.338202	-0.383202	-0.426507	-0.467227	-0.504822	-0.540178	-0.572305	-0.600572	-0.625845	-0.64616	-0.655289
0.397412	0.510329	0.632212	0.72493	0.769663	0.770578	0.745148	0.705581	0.650675	0.577596	0.492433	0.409203	0.342355	0.292807	0.251014	0.209878	0.169385	0.136147	0.113035	0.0978889	0.0853229	0.0715704	0.0593922	0.0523767	0.0478868	0.041301	0.027527	0.00907219	-0.00685502	-0.0163102	-0.0216827	-0.0285707	-0.0425918	-0.0648137	-0.0935027	-0.128473	-0.170358	-0.2204	-0.280012	-0.343802	-0.406827	-0.46695	-0.525332	-0.579387	-0.624209	-0.654845	-0.665889	-0.657056	-0.635865	-0.613504
0.469969	0.635685	0.799406	0.939221	1.03808	1.07954	1.08171	1.06511	1.03494	0.992151	0.936125	0.870674	0.803109	0.740433	0.687443	0.639182	0.590227	0.536247	0.479807	0.427627	0.384	0.349308	0.321132	0.296051	0.271728	0.248224	0.226252	0.206585	0.189332	0.17205	0.15429	0.137604	0.124065	0.112156	0.0993551	0.083738	0.0628636	0.0374981	0.0105069	-0.0172263	-0.0479807	-0.0848097	-0.12841	-0.178569	-0.233715	-0.28683	-0.333774	-0.374013	-0.406567	-0.429271
0.304111	0.40151	0.533974	0.65124	0.715612	0.723306	0.69492	0.654703	0.616269	0.582387	0.553748	0.531436	0.511475	0.486942	0.450176	0.396413	0.331561	0.268322	0.216455	0.179093	0.156926	0.148286	0.148654	0.153346	0.153926	0.140112	0.111089	0.0752727	0.0403823	0.0114396	-0.00958249	-0.0238679	-0.0341837	-0.0429506	-0.0521897	-0.0667067	-0.0941852	-0.135892	-0.189211	-0.244219	-0.294292	-0.338529	-0.379522	-0.420406	-0.459346	-0.493283	-0.524551	-0.55259	-0.577347	-0.591505
0.37065	0.443563	0.525387	0.575189	0.585111	0.573087	0.557774	0.538708	0.507818	0.467336	0.417041	0.356206	0.291371	0.227676	0.169467	0.126012	0.0995525	0.0827727	0.0717273	0.0611035	0.0492889	0.0355576	0.0157444	-0.00897172	-0.0309515	-0.0492434	-0.0668424	-0.0859091	-0.103671	-0.115831	-0.126165	-0.139068	-0.155609	-0.179167	-0.207541	-0.242898	-0.288541	-0.34729	-0.416775	-0.491311	-0.565282	-0.633148	-0.692021	-0.742733	-0.784378	-0.813386	-0.829875	-0.837956	-0.847945	-0.858087
0.299613	0.420727	0.53666	0.615394	0.63995	0.625199	0.59742	0.569019	0.536802	0.496713	0.451933	0.40668	0.358072	0.29984	0.232528	0.163933	0.104849	0.0645612	0.043	0.0329122	0.0253572	0.0144784	0.00193481	-0.0145572	-0.0400238	-0.0717174	-0.102601	-0.124829	-0.139649	-0.150787	-0.160051	-0.170723	-0.187438	-0.214089	-0.251756	-0.298428	-0.350259	-0.401848	-0.449403	-0.495546	-0.542702	-0.588259	-0.628926	-0.662686	-0.688766	-0.706872	-0.71473	-0.709933	-0.690021	-0.651712
0.338308	0.420868	0.519841	0.610069	0.671813	0.701268	0.70469	0.687987	0.654666	0.608802	0.56172	0.523393	0.493214	0.464197	0.430116	0.38733	0.338893	0.290113	0.243932	0.202606	0.164022	0.127835	0.0914103	0.0543494	0.0205237	-0.00658249	-0.0251109	-0.0376923	-0.0498407	-0.0636268	-0.0771018	-0.0878311	-0.0998353	-0.119607	-0.147596	-0.182444	-0.22376	-0.269733	-0.318506	-0.369811	-0.422146	-0.475578	-0.528405	-0.580285	-0.626006	-0.655814	-0.670615	-0.680262	-0.692345	-0.706527
0.382037	0.457245	0.521365	0.571366	0.603792	0.615255	0.610348	0.597752	0.58187	0.563131	0.540671	0.51362	0.48337	0.450146	0.411024	0.366216	0.318309	0.272607	0.23222	0.197776	0.170046	0.148272	0.131295	0.118381	0.106926	0.0942655	0.0794275	0.0622043	0.0438749	0.0245516	0.00536513	-0.0147126	-0.037732	-0.0642716	-0.0955233	-0.131972	-0.172474	-0.217247	-0.265618	-0.318496	-0.372372	-0.424014	-0.471123	-0.512779	-0.548254	-0.576916	-0.598841	-0.613585	-0.620422	-0.617723
0.457269	0.515645	0.622042	0.749804	0.857625	0.918458	0.932216	0.916328	0.88655	0.846661	0.796644	0.740451	0.681432	0.620043	0.555235	0.48556	0.411755	0.338425	0.273802	0.223711	0.185054	0.152796	0.122134	0.0947431	0.0757001	0.0618117	0.0450618	0.0228182	-0.00109091	-0.0223846	-0.0397187	-0.0544738	-0.0692812	-0.0847313	-0.100741	-0.119666	-0.144399	-0.18033	-0.231601	-0.299956	-0.380658	-0.46773	-0.556948	-0.646248	-0.733235	-0.814575	-0.88341	-0.932326	-0.956651	-0.956271
0.381484	0.472169	0.559849	0.61396	0.624003	0.602633	0.573313	0.549461	0.526937	0.497413	0.460621	0.422143	0.385215	0.347783	0.308311	0.265968	0.224315	0.187894	0.159686	0.135243	0.107338	0.0748729	0.046319	0.0256295	0.0116149	-0.000736396	-0.0167592	-0.0367889	-0.0558661	-0.0756676	-0.0996784	-0.129354	-0.163756	-0.201946	-0.24077	-0.281316	-0.327956	-0.385324	-0.45253	-0.525537	-0.597156	-0.661832	-0.723019	-0.778033	-0.818466	-0.838132	-0.834486	-0.817073	-0.788193	-0.743774
0.443226	0.46051	0.515419	0.587376	0.645791	0.67385	0.674794	0.658115	0.624707	0.568531	0.492487	0.41133	0.339892	0.28283	0.237135	0.203948	0.184218	0.171771	0.159581	0.142587	0.114015	0.0716833	0.034681	0.00511535	-0.0272278	-0.058321	-0.0843617	-0.10139	-0.107808	-0.112866	-0.126804	-0.154282	-0.191632	-0.229538	-0.26639	-0.305846	-0.34949	-0.399888	-0.460416	-0.527556	-0.593814	-0.662091	-0.731428	-0.797433	-0.858903	-0.91354	-0.959944	-0.994682	-1.0134	-1.014
0.228	0.265712	0.305074	0.327549	0.321444	0.29423	0.265563	0.246179	0.232765	0.218909	0.204469	0.190671	0.176289	0.159381	0.136692	0.109509	0.0835282	0.0654848	0.0531818	0.0399179	0.0263081	0.0160038	0.0108796	0.00375547	-0.0129785	-0.0329714	-0.0466385	-0.0522576	-0.0584066	-0.0729297	-0.0967601	-0.123095	-0.149276	-0.177528	-0.209581	-0.246681	-0.285587	-0.320298	-0.351343	-0.383509	-0.420331	-0.457989	-0.494535	-0.529585	-0.559435	-0.582795	-0.602782	-0.625122	-0.650842	-0.663176
0.200533	0.257346	0.32268	0.367101	0.370583	0.340788	0.302602	0.274923	0.256284	0.2374	0.217175	0.201422	0.192147	0.182341	0.163809	0.136337	0.104445	0.0784788	0.0634909	0.0523273	0.0443098	0.0343596	0.024437	0.0113481	-0.0104505	-0.0373253	-0.0612168	-0.0761515	-0.0820505	-0.0836222	-0.089097	-0.0991084	-0.114069	-0.1356	-0.163176	-0.194867	-0.232533	-0.271366	-0.307259	-0.341574	-0.374946	-0.406101	-0.440194	-0.477557	-0.516852	-0.558594	-0.595323	-0.620587	-0.631511	-0.630748
0.3244	0.472209	0.614204	0.715033	0.757774	0.745645	0.699664	0.644949	0.586614	0.523005	0.456001	0.399711	0.368589	0.35731	0.348072	0.320979	0.26674	0.212444	0.175014	0.141019	0.0979495	0.0649136	0.0383389	0.0165692	0.0179833	0.0254045	0.0231505	0.0115545	-0.00855	-0.0318747	-0.0540697	-0.0705035	-0.0820328	-0.0940833	-0.105193	-0.113161	-0.133409	-0.179031	-0.238984	-0.308859	-0.38396	-0.455224	-0.520465	-0.578148	-0.629244	-0.673718	-0.714486	-0.749913	-0.776779	-0.792382
0.257	0.351323	0.468263	0.572711	0.639834	0.659754	0.641242	0.615066	0.599402	0.585463	0.561153	0.524939	0.482609	0.438426	0.390215	0.341628	0.272767	0.19079	0.118281	0.0839421	0.0667934	0.0487218	0.0280505	0.00908632	-0.00662534	-0.0177833	-0.0275601	-0.038	-0.0494454	-0.0647282	-0.0801763	-0.0933893	-0.107578	-0.125212	-0.150076	-0.184924	-0.227537	-0.273899	-0.326543	-0.383452	-0.438462	-0.495797	-0.554408	-0.603801	-0.64996	-0.697157	-0.743242	-0.784868	-0.817328	-0.838821
0.29793	0.405999	0.523691	0.616769	0.659737	0.654523	0.621192	0.575599	0.526446	0.483136	0.456499	0.444932	0.437329	0.418348	0.380767	0.330745	0.280723	0.23778	0.203568	0.177024	0.157877	0.144671	0.134087	0.122981	0.108782	0.0949123	0.0847538	0.0792558	0.0764537	0.0769105	0.0808851	0.085603	0.0824874	0.0675853	0.0405527	0.00586129	-0.0304598	-0.0683394	-0.1096	-0.155106	-0.203441	-0.253949	-0.306774	-0.362988	-0.416961	-0.463659	-0.50126	-0.531235	-0.555465	-0.57282
0.4544	0.590835	0.721565	0.811325	0.840365	0.825489	0.802348	0.786345	0.76505	0.72566	0.670101	0.608013	0.542636	0.472725	0.399962	0.331151	0.2748	0.236165	0.209908	0.185739	0.157683	0.126845	0.0980032	0.0713665	0.0454355	0.0225488	0.0101931	0.00884805	0.00785671	-0.00042785	-0.0166381	-0.0374739	-0.0591322	-0.0825048	-0.111531	-0.147044	-0.186704	-0.227841	-0.27187	-0.323613	-0.385678	-0.454613	-0.525517	-0.597303	-0.666251	-0.728212	-0.778438	-0.819767	-0.858228	-0.890267
0.268386	0.347083	0.452302	0.550468	0.607045	0.610799	0.577904	0.536088	0.501273	0.47543	0.453228	0.427356	0.395132	0.355854	0.307417	0.251894	0.195544	0.146585	0.110412	0.0853152	0.0715527	0.0675026	0.0680873	0.0671289	0.0552147	0.0307055	0.00476263	-0.0156104	-0.0318198	-0.0434343	-0.052129	-0.0592906	-0.0665198	-0.0796952	-0.10433	-0.140149	-0.183642	-0.232803	-0.286846	-0.346549	-0.41167	-0.480296	-0.551162	-0.623154	-0.695021	-0.761968	-0.814583	-0.850286	-0.867906	-0.864627
0.438244	0.602034	0.756515	0.86595	0.908775	0.897704	0.866504	0.833215	0.794516	0.744251	0.689563	0.643588	0.608758	0.576229	0.536552	0.49163	0.44904	0.411808	0.375018	0.330925	0.28313	0.242713	0.212138	0.188415	0.166893	0.146362	0.130613	0.119531	0.106413	0.0870467	0.0640404	0.0423235	0.0231217	0.000585185	-0.0303895	-0.0696175	-0.113362	-0.158356	-0.206692	-0.260259	-0.31935	-0.381603	-0.446754	-0.514041	-0.583464	-0.647226	-0.69811	-0.735114	-0.766846	-0.795051
0.396735	0.476389	0.562094	0.625658	0.652232	0.647978	0.626866	0.596056	0.553021	0.497644	0.443933	0.409174	0.393986	0.383591	0.365366	0.333742	0.292544	0.247319	0.203384	0.164143	0.128488	0.0967711	0.0726319	0.0560974	0.0397671	0.0154833	-0.0151334	-0.0439003	-0.0691659	-0.0933049	-0.120355	-0.150766	-0.179352	-0.20539	-0.233492	-0.268357	-0.312853	-0.366086	-0.424226	-0.483307	-0.541462	-0.600767	-0.661967	-0.723292	-0.782518	-0.837245	-0.887265	-0.931065	-0.963942	-0.982318
0.188351	0.241258	0.353471	0.463303	0.530245	0.561729	0.581518	0.595696	0.591272	0.562993	0.521361	0.478664	0.436597	0.394472	0.358048	0.335097	0.319366	0.294341	0.257926	0.22363	0.200102	0.181932	0.163566	0.146785	0.133824	0.122188	0.106069	0.0862076	0.0677095	0.0520511	0.0337547	0.0095303	-0.0162632	-0.0392973	-0.0621678	-0.0899872	-0.125848	-0.165793	-0.208008	-0.256483	-0.303613	-0.34148	-0.372999	-0.407273	-0.440913	-0.464515	-0.47806	-0.489862	-0.509072	-0.532977
0.534857	0.59082	0.680769	0.769506	0.817756	0.83023	0.826493	0.805746	0.76267	0.703755	0.64219	0.58551	0.531304	0.480157	0.435278	0.398709	0.369876	0.33925	0.30117	0.256504	0.209199	0.16739	0.131325	0.0961852	0.0677157	0.0506755	0.0373696	0.0189524	-0.00552766	-0.0334246	-0.060824	-0.0862649	-0.110644	-0.135418	-0.162328	-0.195365	-0.237954	-0.291676	-0.354732	-0.425038	-0.501571	-0.582565	-0.665587	-0.746471	-0.820757	-0.882278	-0.925573	-0.941983	-0.924208	-0.878215
0.335051	0.402842	0.478916	0.53529	0.559792	0.56102	0.551138	0.534735	0.511058	0.481426	0.452416	0.428613	0.408306	0.384724	0.353369	0.314471	0.275786	0.244649	0.221238	0.201209	0.18324	0.169406	0.161142	0.15503	0.14592	0.133362	0.120565	0.110825	0.103047	0.0935575	0.081603	0.0672842	0.0499641	0.0291941	0.00256975	-0.0314838	-0.0705501	-0.111	-0.15087	-0.190792	-0.22969	-0.267137	-0.301002	-0.332247	-0.362643	-0.390419	-0.411154	-0.420591	-0.415487	-0.397803
0.261432	0.327822	0.436592	0.552888	0.630783	0.657259	0.628227	0.554204	0.455635	0.358722	0.286386	0.242012	0.212364	0.184694	0.150768	0.112283	0.0786358	0.0515845	0.0245676	-0.00810756	-0.042309	-0.0685135	-0.0874655	-0.111099	-0.138115	-0.16227	-0.180785	-0.195941	-0.211682	-0.230354	-0.251794	-0.276124	-0.304454	-0.337757	-0.378194	-0.423689	-0.477818	-0.542263	-0.612692	-0.68339	-0.751937	-0.815551	-0.877189	-0.930239	-0.973303	-1.00552	-1.02492	-1.0394	-1.06049	-1.07823
0.245943	0.347544	0.44268	0.504255	0.521175	0.503906	0.471464	0.433947	0.390184	0.337543	0.280555	0.228153	0.182565	0.141996	0.109467	0.0884424	0.0748392	0.0631176	0.0481861	0.030039	0.00936566	-0.0123227	-0.0327397	-0.0506425	-0.0671532	-0.0828648	-0.0961458	-0.105109	-0.112514	-0.123986	-0.142309	-0.164786	-0.189099	-0.21574	-0.243896	-0.269251	-0.289978	-0.308624	-0.3283	-0.352708	-0.383299	-0.421794	-0.468298	-0.521978	-0.578005	-0.634157	-0.689759	-0.741118	-0.783392	-0.811438
0.181534	0.222539	0.277629	0.341666	0.40395	0.451267	0.473684	0.462919	0.42062	0.358823	0.286787	0.21113	0.139048	0.0783457	0.035081	0.0124467	0.00819732	0.0172894	0.0325016	0.0422802	0.0412045	0.031918	0.0173027	-0.000273424	-0.0176003	-0.0343156	-0.053977	-0.0786364	-0.106002	-0.13465	-0.16028	-0.179767	-0.194995	-0.20654	-0.216656	-0.227603	-0.241871	-0.261451	-0.284395	-0.310208	-0.335656	-0.362714	-0.394949	-0.429062	-0.465134	-0.504627	-0.544373	-0.58269	-0.618961	-0.651197
0.333096	0.369811	0.417125	0.47949	0.533756	0.558397	0.556854	0.542877	0.517977	0.477193	0.424844	0.37209	0.327657	0.292333	0.26065	0.22718	0.190532	0.15595	0.12861	0.105888	0.0847871	0.0659649	0.0496099	0.0323009	0.00867086	-0.0217487	-0.0521126	-0.0798008	-0.107593	-0.134848	-0.158952	-0.179214	-0.196942	-0.214816	-0.234718	-0.258535	-0.28834	-0.32373	-0.364588	-0.414129	-0.471833	-0.532475	-0.590229	-0.640872	-0.682712	-0.715923	-0.741057	-0.760072	-0.773102	-0.779039
0.36025	0.439987	0.576284	0.720496	0.819013	0.845855	0.812826	0.751529	0.68716	0.627366	0.570135	0.514587	0.463948	0.420281	0.380619	0.339066	0.295009	0.252721	0.216465	0.184903	0.150824	0.106835	0.0556353	0.00930687	-0.0272049	-0.0581065	-0.0860329	-0.109069	-0.12182	-0.12499	-0.126819	-0.13625	-0.153808	-0.175279	-0.197681	-0.222007	-0.252607	-0.293797	-0.344968	-0.3991	-0.450611	-0.499353	-0.549025	-0.603985	-0.663767	-0.724563	-0.783636	-0.841979	-0.902219	-0.965492
0.460985	0.468134	0.537137	0.65553	0.783316	0.887154	0.953618	0.978645	0.95466	0.881624	0.775476	0.663901	0.568872	0.496878	0.449506	0.421991	0.406263	0.398048	0.394222	0.38497	0.359748	0.317395	0.265332	0.21571	0.165535	0.111222	0.0624963	0.023489	-0.00661754	-0.0344747	-0.0632539	-0.0901879	-0.1172	-0.144581	-0.17253	-0.204872	-0.238727	-0.272831	-0.310166	-0.354579	-0.407866	-0.466743	-0.526416	-0.587079	-0.648564	-0.704693	-0.747872	-0.778296	-0.805357	-0.840262
0.324882	0.352731	0.448465	0.57258	0.670452	0.717089	0.717982	0.681921	0.61851	0.55364	0.50819	0.480576	0.458627	0.433062	0.401117	0.365528	0.332532	0.304104	0.277693	0.254615	0.238784	0.225094	0.204602	0.175913	0.145366	0.120954	0.100451	0.0779462	0.0562666	0.0370125	0.0141519	-0.0139213	-0.0447131	-0.0733377	-0.093493	-0.104583	-0.11319	-0.124745	-0.141744	-0.168152	-0.208814	-0.263141	-0.322116	-0.374891	-0.417254	-0.451453	-0.480013	-0.504435	-0.528581	-0.558246
0.418915	0.332321	0.289721	0.329014	0.411453	0.500605	0.592169	0.677186	0.728044	0.726009	0.670837	0.585317	0.502828	0.442103	0.399871	0.359706	0.315886	0.270094	0.216907	0.158587	0.105547	0.0653582	0.0372479	0.0107657	-0.0183103	-0.0481414	-0.0725659	-0.0919666	-0.110152	-0.126498	-0.144175	-0.164969	-0.19135	-0.224151	-0.259476	-0.296576	-0.333263	-0.369497	-0.408256	-0.451492	-0.498792	-0.547037	-0.591752	-0.636901	-0.686213	-0.736089	-0.781826	-0.81705	-0.837562	-0.84571
0.278801	0.340609	0.395001	0.435407	0.453521	0.450191	0.436506	0.423947	0.415566	0.408343	0.395707	0.373373	0.343285	0.308417	0.269624	0.228124	0.187737	0.151691	0.122539	0.09681	0.071671	0.0486392	0.025699	0.00157748	-0.0221846	-0.0421302	-0.0597219	-0.076401	-0.0900247	-0.102383	-0.117364	-0.137469	-0.163097	-0.19252	-0.225698	-0.263276	-0.304446	-0.350461	-0.402418	-0.457755	-0.513705	-0.568538	-0.617181	-0.660171	-0.696024	-0.7217	-0.737608	-0.746735	-0.751944	-0.751978
0.36156	0.434457	0.496658	0.519295	0.493555	0.449765	0.418782	0.405787	0.396376	0.379009	0.350632	0.309787	0.258295	0.204237	0.15781	0.129717	0.119266	0.11117	0.09478	0.0661804	0.0295255	-0.00700606	-0.0394533	-0.0618889	-0.0699624	-0.0731887	-0.0771246	-0.0874273	-0.110515	-0.141449	-0.17624	-0.21015	-0.229538	-0.237013	-0.246828	-0.269329	-0.303756	-0.347754	-0.400727	-0.460982	-0.523039	-0.585013	-0.644142	-0.699934	-0.755847	-0.813593	-0.87127	-0.921805	-0.956907	-0.973661
0.302063	0.447907	0.639863	0.779028	0.821304	0.79013	0.726222	0.652613	0.58414	0.534835	0.507583	0.493257	0.479648	0.463808	0.442598	0.410013	0.363366	0.304703	0.234057	0.168552	0.122828	0.0949261	0.0690347	0.037976	0.0143049	-0.00642866	-0.0323491	-0.0627727	-0.0859444	-0.101912	-0.122127	-0.147992	-0.174989	-0.200688	-0.224954	-0.254503	-0.29467	-0.342302	-0.390213	-0.436544	-0.486957	-0.542277	-0.596307	-0.643565	-0.68541	-0.724097	-0.752391	-0.765051	-0.773652	-0.804814
0.421628	0.537882	0.675542	0.787675	0.831076	0.805908	0.764552	0.740032	0.720769	0.682044	0.619532	0.548032	0.483817	0.426923	0.367587	0.305596	0.253593	0.219826	0.196498	0.169619	0.138242	0.114462	0.102314	0.08675	0.0599718	0.0301173	0.00766506	-0.00923652	-0.0315098	-0.0610119	-0.0916095	-0.115794	-0.135384	-0.156914	-0.185379	-0.218512	-0.246714	-0.270745	-0.301274	-0.345142	-0.402033	-0.46945	-0.546398	-0.629689	-0.707177	-0.767948	-0.809366	-0.835194	-0.856844	-0.873555
0.511686	0.609623	0.698008	0.750362	0.748095	0.705605	0.653939	0.607367	0.558973	0.503234	0.446776	0.399529	0.3599	0.319221	0.275486	0.231695	0.193302	0.163281	0.141086	0.118729	0.0918557	0.066955	0.0466333	0.023955	-0.00572857	-0.0370199	-0.0621466	-0.0775247	-0.0910729	-0.112189	-0.137381	-0.159524	-0.181513	-0.207605	-0.240599	-0.281562	-0.325343	-0.367817	-0.411539	-0.459388	-0.510891	-0.563899	-0.619613	-0.681315	-0.749921	-0.8133	-0.862783	-0.896376	-0.916968	-0.926185
0.413161	0.4614	0.592836	0.723941	0.768413	0.717174	0.624938	0.531807	0.446195	0.36417	0.283404	0.2069	0.141546	0.0875497	0.0438957	0.0153646	0.00499804	-0.00529488	-0.0276657	-0.0619127	-0.0920326	-0.122868	-0.163957	-0.203169	-0.233922	-0.243851	-0.243412	-0.244103	-0.244454	-0.248883	-0.260866	-0.279923	-0.310057	-0.347634	-0.385835	-0.426576	-0.475015	-0.5316	-0.594207	-0.663193	-0.740207	-0.817043	-0.883283	-0.937117	-0.983437	-1.01458	-1.02836	-1.03271	-1.04305	-1.05643
0.305486	0.350538	0.426825	0.504784	0.554919	0.58246	0.601831	0.601408	0.563894	0.504546	0.449731	0.410996	0.386048	0.363116	0.336874	0.311497	0.289421	0.268224	0.247488	0.227891	0.202255	0.170486	0.142182	0.123024	0.106722	0.0832078	0.0537967	0.0240692	-0.009761	-0.0469651	-0.0821326	-0.108781	-0.124699	-0.134125	-0.14391	-0.161545	-0.192385	-0.239885	-0.296491	-0.349071	-0.391072	-0.42774	-0.462419	-0.496565	-0.534955	-0.579152	-0.621916	-0.654078	-0.675153	-0.687436
[truncated: 11 more columns]
