# Supplementary material for: Comparison of sagittal plane gait characteristics between the overground and treadmill approach for gait analysis in typically developing children
Source: PeerJ. 2022 Jul 22;10:e13752. doi: 10.7717/peerj.13752 (PMC9310770; doi:10.7717/peerj.13752)
Supplement: Supplemental Information 4 — Each colum represents a percentage of the gait cycle (0–100%). Every raw represents data of one child.Sheet 1 data of the overground approachSheet 2 data of the treadmill approach [file peerj-10-13752-s004.xlsx]

## Sheet: 1
0.0240291	0.0366509	0.0600361	0.114836	0.139855	0.179517	0.220633	0.241071	0.237431	0.229995	0.213937	0.189061	0.163642	0.139464	0.118743	0.0995502	0.0853367	0.0719473	0.0606949	0.0510831	0.0436123	0.0359352	0.0289222	0.0211802	0.0152977	0.00877533	0.00286528	-0.00198357	-0.00625319	-0.0118868	-0.0178232	-0.024081	-0.0299933	-0.0359305	-0.0423146	-0.0491486	-0.0563345	-0.0649576	-0.0752418	-0.0866456	-0.0995963	-0.113507	-0.128573	-0.143666	-0.158679	-0.172604	-0.1841	-0.191972	-0.194836	-0.190954
0.000410427	-0.0126308	-0.0270597	0.0400058	0.0572428	0.0799802	0.10777	0.148965	0.17919	0.214302	0.212492	0.21781	0.211765	0.197761	0.18644	0.165442	0.145185	0.127441	0.110904	0.0977681	0.0869817	0.0786861	0.070951	0.0640683	0.0583792	0.0521506	0.0472339	0.0411604	0.0360201	0.0308817	0.0273988	0.025162	0.022574	0.0197104	0.0167796	0.012977	0.00862519	0.00309532	-0.00444409	-0.0134309	-0.0241697	-0.0361842	-0.0487662	-0.0615005	-0.0716066	-0.0858334	-0.0950845	-0.105233	-0.113301	-0.118174
0.00317973	0.0827363	0.166728	0.152302	0.117862	0.14545	0.181334	0.204631	0.21094	0.20104	0.189	0.1762	0.162477	0.153975	0.143471	0.129383	0.112168	0.0932112	0.0752268	0.060132	0.0480516	0.0380893	0.0291426	0.0206433	0.0126786	0.00534171	-0.00114918	-0.00773635	-0.0154496	-0.0238535	-0.0324768	-0.0387268	-0.0420783	-0.0432861	-0.0437041	-0.0455216	-0.0493625	-0.0562793	-0.0672203	-0.0802038	-0.0958187	-0.112885	-0.130768	-0.149032	-0.165676	-0.180829	-0.193875	-0.205337	-0.216829	-0.225147
0.127692	0.111147	0.120442	0.228157	0.173563	0.259517	0.284994	0.300948	0.302111	0.24815	0.248097	0.191246	0.179816	0.142748	0.104431	0.0904017	0.0503074	0.0514231	0.0190695	0.0133796	-0.00104592	-0.0154436	-0.0159505	-0.0371186	-0.0329658	-0.0426798	-0.0416206	-0.0433989	-0.0477086	-0.0444465	-0.0515906	-0.0488763	-0.0547711	-0.0587283	-0.0618732	-0.0700353	-0.0753485	-0.0860115	-0.0941368	-0.103582	-0.11518	-0.125172	-0.13812	-0.144334	-0.151587	-0.157279	-0.164613	-0.170998	-0.174344	-0.177728
-0.0539173	0.0549887	0.156439	0.134146	0.106435	0.130527	0.14068	0.155246	0.166496	0.166944	0.163197	0.14757	0.130922	0.110992	0.0900664	0.0705162	0.0514814	0.0338944	0.0181055	0.00355577	-0.00983645	-0.020915	-0.0298171	-0.0366447	-0.042571	-0.0472618	-0.0520402	-0.0562287	-0.0601237	-0.0635126	-0.0638987	-0.0612137	-0.0568401	-0.0539087	-0.0538112	-0.0550915	-0.0576013	-0.0625165	-0.0693171	-0.0777426	-0.0881703	-0.100285	-0.114346	-0.128658	-0.143779	-0.158323	-0.172671	-0.176545	-0.17967	-0.176672
-0.00200995	0.0141068	0.0383466	0.0307556	0.0396867	0.0920816	0.093961	0.11266	0.122195	0.140017	0.15951	0.175305	0.173046	0.166213	0.159489	0.148007	0.136552	0.122918	0.107382	0.0942916	0.0827026	0.0731597	0.0644383	0.0550313	0.0468404	0.039412	0.0320694	0.0263298	0.0204408	0.0140799	0.00634436	-0.000944597	-0.00870639	-0.0168025	-0.0253358	-0.0333452	-0.04121	-0.0492755	-0.0580158	-0.0670272	-0.0767331	-0.0868757	-0.0978536	-0.109533	-0.122376	-0.136804	-0.15148	-0.166036	-0.180061	-0.193023
0.0235749	0.0509167	0.0961767	0.107714	0.122069	0.135954	0.159359	0.167172	0.15609	0.145316	0.132066	0.116618	0.100108	0.0840296	0.0694169	0.0566247	0.0467486	0.0385929	0.0320661	0.026839	0.0234113	0.0209792	0.0187648	0.0173426	0.0165822	0.0160569	0.0158008	0.0157012	0.0150097	0.0133872	0.0109838	0.00738943	0.00270331	-0.00306141	-0.010008	-0.0181101	-0.0272548	-0.0372412	-0.048	-0.0589709	-0.0700707	-0.0809569	-0.091857	-0.102302	-0.11193	-0.120262	-0.124691	-0.119789	-0.127523	-0.131332
0.0162346	0.0463801	0.0875531	0.0998592	0.118962	0.125838	0.132629	0.126565	0.12779	0.117653	0.112367	0.10301	0.0983694	0.0942433	0.0856051	0.0806039	0.072227	0.0648158	0.0589505	0.0511299	0.0445531	0.0388479	0.0338854	0.0287471	0.0240357	0.0196478	0.0155251	0.0121319	0.0086666	0.00530581	0.00234369	-0.000684042	-0.00379294	-0.00686753	-0.010179	-0.0137006	-0.0179618	-0.0229366	-0.029031	-0.0367367	-0.0438502	-0.0501928	-0.0570147	-0.0624276	-0.0667516	-0.0699987	-0.0741506	-0.0804605	-0.0852035	-0.0923743
0.0493431	0.0583539	0.107293	0.164015	0.194585	0.194713	0.225408	0.248633	0.243191	0.243096	0.2309	0.210097	0.183283	0.157948	0.130006	0.101155	0.0777411	0.0582923	0.0399126	0.028453	0.0252567	0.0159434	-0.00142666	-0.0120378	-0.0220608	-0.0306713	-0.0347155	-0.0384843	-0.0432083	-0.0445421	-0.0454067	-0.0469317	-0.0493072	-0.0496233	-0.0515726	-0.0563066	-0.0626892	-0.071565	-0.0844628	-0.100461	-0.116736	-0.133965	-0.151638	-0.167704	-0.181353	-0.191788	-0.200023	-0.199649	-0.204297	-0.196108
0.00954195	0.051968	0.0964572	0.115885	0.140631	0.158018	0.195617	0.217383	0.220766	0.212881	0.201826	0.185604	0.165345	0.145283	0.126597	0.110956	0.0971773	0.0856457	0.0757874	0.0673178	0.0589522	0.0507909	0.0440478	0.0385242	0.0341727	0.0310173	0.0276234	0.0247648	0.0213268	0.0187158	0.0149106	0.0104335	0.00567533	0.000598161	-0.00515463	-0.0117434	-0.0200144	-0.0288944	-0.0381625	-0.0482157	-0.059016	-0.0704571	-0.0828534	-0.0956805	-0.108349	-0.12074	-0.132867	-0.144713	-0.1552	-0.143874
0.0232158	0.128841	0.231159	0.22826	0.331263	0.288507	0.261887	0.263002	0.254172	0.242677	0.204057	0.209512	0.148647	0.123781	0.097055	0.0608311	0.0390535	0.0245058	0.0119961	-0.00610849	-0.00624541	-0.0158381	-0.0291084	-0.0259573	-0.037752	-0.0381223	-0.0406715	-0.039648	-0.0438568	-0.042776	-0.0429483	-0.046587	-0.0442124	-0.0473411	-0.0501775	-0.0526572	-0.0559874	-0.0615287	-0.0703728	-0.0776482	-0.0890053	-0.0988212	-0.10883	-0.118856	-0.133151	-0.143254	-0.153167	-0.161645	-0.166973	-0.166128
0.113604	0.111602	0.133004	0.199006	0.207198	0.2078	0.202939	0.206114	0.202864	0.1895	0.174349	0.157749	0.13112	0.106953	0.0828083	0.0596358	0.0413927	0.0257266	0.0122474	0.000521198	-0.0105363	-0.0188507	-0.0230428	-0.0270534	-0.0294202	-0.030057	-0.0321701	-0.0338809	-0.0336983	-0.0348123	-0.0352944	-0.034582	-0.0354679	-0.038874	-0.0427608	-0.0488444	-0.0553124	-0.0633283	-0.074299	-0.086853	-0.0996445	-0.114755	-0.12938	-0.142916	-0.156651	-0.16882	-0.179283	-0.188772	-0.196526	-0.203394
0.0636805	0.0620247	0.111918	0.166813	0.199792	0.254563	0.295187	0.315111	0.315928	0.310161	0.29598	0.279962	0.259844	0.238754	0.218728	0.195732	0.172231	0.15013	0.126953	0.106922	0.0894266	0.0735957	0.0619698	0.0532862	0.0464588	0.0411729	0.0358904	0.0304079	0.0246899	0.0194637	0.0139248	0.00867701	0.00226017	-0.00485957	-0.0126438	-0.0218088	-0.0316847	-0.0434805	-0.0572268	-0.0727201	-0.0907504	-0.110498	-0.13219	-0.15473	-0.178111	-0.200491	-0.221659	-0.239252	-0.253681	-0.264129
0.0388172	0.0561156	0.122645	0.157941	0.181132	0.190594	0.208142	0.227944	0.23822	0.234756	0.222608	0.203743	0.183823	0.159407	0.131641	0.105951	0.0846002	0.0639256	0.0486178	0.0365185	0.0260376	0.0177928	0.0134354	0.00843256	0.0046837	0.0016876	-0.00169565	-0.00667961	-0.0101132	-0.0126876	-0.0165679	-0.0202203	-0.0234006	-0.0276052	-0.0334132	-0.0391236	-0.0462229	-0.055636	-0.0652626	-0.0783508	-0.0935135	-0.109775	-0.126949	-0.144027	-0.160007	-0.17732	-0.19108	-0.207073	-0.218359	-0.235106
-0.0271609	0.0567888	0.106358	0.129984	0.131119	0.167606	0.200469	0.228835	0.232379	0.228069	0.216929	0.202255	0.185147	0.165756	0.146263	0.126718	0.107904	0.0891032	0.0733348	0.0599474	0.0466754	0.0347954	0.0250597	0.0161798	0.00811461	0.001769	-0.00328858	-0.00813562	-0.0128327	-0.0169867	-0.020742	-0.024696	-0.0301706	-0.0362353	-0.0434394	-0.0513824	-0.0602634	-0.0703361	-0.0823149	-0.095207	-0.110615	-0.12753	-0.145378	-0.164247	-0.183271	-0.201494	-0.218296	-0.232365	-0.243501	-0.251586
0.0428306	0.0865922	0.130734	0.147607	0.147785	0.170134	0.188644	0.193376	0.186013	0.176582	0.165736	0.154128	0.140401	0.126501	0.110325	0.0925213	0.0769783	0.062914	0.0501665	0.0393579	0.0301995	0.0231873	0.016895	0.0110113	0.00587193	0.00111346	-0.00343649	-0.00768505	-0.0119962	-0.0161931	-0.0208459	-0.0250351	-0.0306419	-0.0371373	-0.044796	-0.0538345	-0.0638561	-0.0753792	-0.0875365	-0.10071	-0.114609	-0.130231	-0.14605	-0.162353	-0.179369	-0.195693	-0.210601	-0.224811	-0.228257	-0.222291
-0.0236033	0.00167029	0.0665428	0.112013	0.11686	0.141106	0.167833	0.173444	0.179152	0.181096	0.177956	0.170779	0.161109	0.146537	0.130887	0.115992	0.102075	0.0898203	0.0784934	0.0684239	0.0592487	0.0515678	0.0441504	0.0375967	0.0320856	0.0269671	0.0230583	0.0191444	0.0149345	0.00984745	0.00411216	-0.00168889	-0.0077595	-0.0135603	-0.0208906	-0.0287906	-0.0380861	-0.0493246	-0.0626239	-0.0776483	-0.0942149	-0.111215	-0.128646	-0.145572	-0.162127	-0.177891	-0.193652	-0.207831	-0.212021	-0.226223
0.00135561	0.0207343	0.0510682	0.08146	0.14305	0.158509	0.186274	0.201496	0.191437	0.191912	0.182074	0.160318	0.140382	0.115968	0.0889064	0.0648349	0.0479529	0.0261911	0.00790884	-0.00421249	-0.0170608	-0.0238617	-0.0319418	-0.0405976	-0.0466595	-0.054297	-0.0582536	-0.0640731	-0.0707488	-0.0749432	-0.0815887	-0.0868568	-0.093212	-0.102055	-0.110417	-0.120539	-0.130225	-0.141323	-0.154777	-0.168444	-0.183499	-0.198954	-0.214828	-0.232543	-0.24977	-0.266792	-0.281411	-0.293395	-0.302231	-0.306605
0.109371	0.183896	0.242243	0.195195	0.194244	0.25066	0.296326	0.295436	0.288728	0.276892	0.247421	0.219486	0.19283	0.165319	0.141671	0.122613	0.107156	0.0926819	0.0790218	0.0665958	0.0549256	0.0444773	0.0357449	0.0296521	0.0271826	0.0279669	0.0293381	0.030084	0.0279638	0.0234725	0.0176931	0.0116108	0.00481567	-0.00330497	-0.0118973	-0.0225899	-0.0352588	-0.0498646	-0.0655483	-0.0820907	-0.100213	-0.118696	-0.13843	-0.158615	-0.178408	-0.197995	-0.216717	-0.232795	-0.245422	-0.251054
0.0571088	0.13877	0.199363	0.172625	0.175497	0.215306	0.26922	0.279157	0.273778	0.250409	0.226437	0.203739	0.179317	0.158082	0.137514	0.119352	0.105831	0.0927266	0.0847158	0.0757387	0.0704728	0.0642701	0.0579584	0.0510818	0.0426999	0.0348164	0.0250626	0.0164418	0.00728454	-0.00201313	-0.0106418	-0.0192654	-0.0278516	-0.0369915	-0.0483037	-0.0597186	-0.0723617	-0.0849481	-0.098681	-0.112562	-0.126471	-0.14131	-0.155346	-0.169666	-0.181114	-0.190531	-0.197707	-0.203579	-0.20859	-0.210285
0.0875532	0.116165	0.163287	0.169348	0.205412	0.227018	0.248854	0.253961	0.243091	0.229578	0.204596	0.180314	0.156473	0.133476	0.111979	0.0921927	0.0744891	0.0594258	0.0460401	0.0348503	0.0252069	0.0175887	0.0110034	0.00579047	0.00123803	-0.00305872	-0.00595748	-0.00745965	-0.0105811	-0.015049	-0.0202311	-0.0255133	-0.0315489	-0.0387093	-0.0453637	-0.0533834	-0.0626179	-0.0741185	-0.0876928	-0.102611	-0.119578	-0.138	-0.157737	-0.179019	-0.198633	-0.21655	-0.231947	-0.242577	-0.249951	-0.252184
0.0063281	0.040785	0.0942979	0.114583	0.108944	0.11572	0.147887	0.175254	0.177693	0.171636	0.167293	0.157547	0.149165	0.137807	0.125174	0.115571	0.105033	0.0939158	0.0826525	0.0735788	0.0637322	0.0556137	0.0485515	0.0416479	0.0350316	0.0276448	0.0216462	0.0147483	0.0086399	0.0026184	-0.00287873	-0.00903396	-0.0154734	-0.0213146	-0.0279696	-0.0349991	-0.0426713	-0.0508851	-0.060954	-0.0723421	-0.0843932	-0.0983059	-0.113306	-0.130552	-0.148205	-0.165663	-0.183066	-0.198419	-0.21061	-0.219691
-0.0553421	-0.0221987	0.0324635	0.06133	0.0647912	0.0940557	0.128512	0.151782	0.163953	0.167707	0.163869	0.157288	0.148677	0.139931	0.129424	0.117714	0.105818	0.0944283	0.0851272	0.0766188	0.0684139	0.0602806	0.0519427	0.0436419	0.0361515	0.0299526	0.0246376	0.0201478	0.0160858	0.0122898	0.0085128	0.0043462	3.76205e-05	-0.00483127	-0.0101608	-0.0158637	-0.0224194	-0.0301235	-0.0395531	-0.0508478	-0.063434	-0.0772415	-0.0901215	-0.101477	-0.111777	-0.122307	-0.133425	-0.145058	-0.157198	-0.169692
0.0611172	0.0841994	0.114843	0.0999599	0.106433	0.138752	0.154378	0.168205	0.183847	0.183862	0.174079	0.159655	0.142678	0.130522	0.122687	0.114751	0.104513	0.0943878	0.0851769	0.077517	0.0711871	0.0653607	0.0601563	0.0548493	0.0494994	0.0438054	0.0383745	0.0332805	0.027684	0.0220727	0.0163582	0.0100908	0.00334883	-0.0042463	-0.0120134	-0.0208327	-0.0305479	-0.041782	-0.0541776	-0.0674686	-0.080633	-0.0940676	-0.107957	-0.121843	-0.136637	-0.152581	-0.16818	-0.184105	-0.199233	-0.208174
-0.0221493	-0.00612189	0.0430539	0.0557924	0.075203	0.116456	0.139319	0.152688	0.161389	0.166161	0.161338	0.1545	0.144321	0.133217	0.122776	0.111865	0.101251	0.0900119	0.0778018	0.065917	0.0548936	0.0443336	0.035846	0.02875	0.0229282	0.0182504	0.0145204	0.0113991	0.00913132	0.00758278	0.00550019	0.00349148	0.000466807	-0.00358032	-0.00911702	-0.0159572	-0.0231561	-0.0317391	-0.0424183	-0.0539169	-0.0669095	-0.0821277	-0.0980657	-0.115442	-0.132953	-0.150581	-0.166862	-0.181689	-0.19521	-0.205628
0.03871	0.0403944	0.0992512	0.136773	0.150404	0.170911	0.20237	0.214987	0.217562	0.207611	0.192714	0.171859	0.152116	0.129891	0.107724	0.0872193	0.0700464	0.055766	0.0427961	0.0331871	0.0261366	0.0216289	0.0182684	0.0172069	0.0159577	0.0156409	0.0153568	0.0147988	0.0143893	0.0138608	0.0129988	0.0109033	0.00787444	0.00357027	-0.00134329	-0.00786281	-0.0161109	-0.025497	-0.0359763	-0.0476922	-0.0604298	-0.0739057	-0.0882635	-0.103403	-0.119162	-0.135201	-0.151414	-0.167379	-0.185966	-0.199387
0.0971148	0.168268	0.183807	0.175996	0.144222	0.173283	0.231218	0.242699	0.264186	0.25099	0.239063	0.218534	0.187963	0.161512	0.135202	0.108847	0.085989	0.0661012	0.0504619	0.0406027	0.030487	0.0260962	0.0221655	0.0191815	0.0187171	0.0139386	0.011997	0.00762617	0.00115202	-0.0059386	-0.0150647	-0.0255402	-0.0361947	-0.0453529	-0.0553568	-0.0653959	-0.0780798	-0.0903259	-0.105976	-0.122994	-0.141752	-0.163964	-0.184845	-0.206703	-0.226527	-0.24635	-0.265581	-0.283607	-0.300352	-0.311854
0.0162382	0.0636492	0.123055	0.1303	0.125282	0.134897	0.143588	0.160903	0.16241	0.160439	0.150696	0.134731	0.120437	0.106249	0.0922986	0.0774401	0.0645056	0.0521477	0.04178	0.0337062	0.0284777	0.0246341	0.021377	0.0190363	0.0167001	0.0147417	0.0130227	0.011138	0.00923419	0.0076352	0.0055557	0.00301628	-0.000455139	-0.00390824	-0.010442	-0.0170623	-0.0257432	-0.0362059	-0.0480283	-0.0598434	-0.0744837	-0.0892447	-0.104105	-0.119608	-0.132828	-0.145369	-0.158827	-0.172	-0.185602	-0.194216
-0.06291	-0.0414488	0.0643265	0.133133	0.107333	0.135507	0.190744	0.198462	0.202391	0.202661	0.196552	0.18611	0.17132	0.15562	0.137306	0.117478	0.0987418	0.0826497	0.0697812	0.0597388	0.0518939	0.0458989	0.0390289	0.032695	0.0261208	0.0204102	0.0160538	0.0124206	0.00980709	0.0074384	0.00485181	0.00202643	-0.001704	-0.00641875	-0.0116915	-0.0179119	-0.0241662	-0.0312257	-0.0399652	-0.0504094	-0.06245	-0.0764894	-0.0916773	-0.107469	-0.123125	-0.139043	-0.155552	-0.173036	-0.190887	-0.199289
0.012218	0.0764347	0.200812	0.226055	0.185971	0.202188	0.210624	0.218803	0.230531	0.222955	0.210347	0.197068	0.18465	0.165839	0.155672	0.141393	0.129146	0.114991	0.103292	0.089568	0.0785821	0.0678549	0.0586072	0.0509158	0.0429022	0.0360066	0.0298504	0.0248429	0.0195658	0.0149312	0.00964707	0.00485232	-0.000472114	-0.00581603	-0.0123459	-0.0191975	-0.0262868	-0.0332969	-0.0406466	-0.0491688	-0.0576901	-0.0670374	-0.0784252	-0.0905374	-0.104115	-0.119403	-0.13528	-0.152819	-0.169639	-0.185925
0.0605893	0.0981375	0.132974	0.144741	0.151819	0.162052	0.183043	0.184266	0.180985	0.175555	0.169951	0.164447	0.154838	0.144878	0.135968	0.126205	0.117813	0.109929	0.101367	0.0935469	0.0858762	0.0780112	0.0709276	0.0647678	0.0581385	0.0517571	0.0461401	0.0410454	0.0362331	0.0309288	0.0256448	0.0191371	0.0127221	0.00591355	-0.00117937	-0.00920722	-0.0183837	-0.0282607	-0.0388573	-0.0503673	-0.0614927	-0.0738048	-0.0866158	-0.0991571	-0.112293	-0.125526	-0.13935	-0.153565	-0.167187	-0.182128
0.0522921	0.0114441	0.0323494	0.101706	0.150383	0.174636	0.20478	0.226974	0.232023	0.225988	0.216428	0.199078	0.181025	0.163433	0.145843	0.128065	0.11192	0.0964272	0.081013	0.067627	0.0560537	0.0448433	0.034043	0.0247534	0.0171784	0.0114221	0.00730082	0.00389974	0.000300652	-0.00331124	-0.00698841	-0.0113551	-0.0164242	-0.0224599	-0.0304943	-0.0397596	-0.0499053	-0.0621874	-0.0746391	-0.0906211	-0.108219	-0.127111	-0.148281	-0.168048	-0.187488	-0.206167	-0.224624	-0.24068	-0.253854	-0.260784
0.0557472	0.0839399	0.120328	0.111188	0.127139	0.17926	0.246413	0.251778	0.256079	0.242124	0.224519	0.205905	0.183544	0.158384	0.14012	0.122491	0.101694	0.0848269	0.0695117	0.0545452	0.0429996	0.0333313	0.0254161	0.0180512	0.0122199	0.00765828	0.00358765	-0.000373845	-0.00375675	-0.00811514	-0.0147613	-0.0237808	-0.034085	-0.0434965	-0.0532157	-0.0641928	-0.0762438	-0.0893219	-0.103685	-0.120502	-0.138766	-0.158419	-0.179243	-0.200666	-0.221705	-0.24266	-0.261558	-0.279792	-0.292582	-0.298575
0.0442776	0.0914649	0.130104	0.134074	0.142149	0.160912	0.179129	0.181767	0.174925	0.168343	0.155797	0.142836	0.136318	0.122962	0.108128	0.096194	0.0837464	0.0733049	0.0650202	0.0578861	0.0508454	0.0444403	0.038219	0.0320213	0.0257635	0.0197205	0.0130721	0.00672173	0.000947302	-0.005267	-0.011558	-0.0173261	-0.0239933	-0.0306051	-0.0372983	-0.0435012	-0.0504242	-0.0581746	-0.0678512	-0.079437	-0.092328	-0.106025	-0.120589	-0.135578	-0.151389	-0.167668	-0.18394	-0.198876	-0.212136	-0.221426
-0.00412498	0.0728166	0.0954033	0.0840609	0.131265	0.175767	0.201142	0.214588	0.216562	0.214966	0.206801	0.194624	0.181989	0.165988	0.151894	0.136794	0.122293	0.108922	0.0961153	0.0820276	0.0686961	0.0559749	0.0443283	0.0347766	0.026532	0.0197735	0.01398	0.00876701	0.00396636	-0.000189176	-0.00513675	-0.0111182	-0.0178446	-0.0248204	-0.0329621	-0.0421063	-0.0519742	-0.0645816	-0.0786264	-0.0947119	-0.111558	-0.128904	-0.146425	-0.163568	-0.18068	-0.197198	-0.213839	-0.229297	-0.243865	-0.2543
0.0181391	0.0717528	0.137712	0.156082	0.140317	0.153304	0.175829	0.205	0.214857	0.213085	0.199463	0.181922	0.164454	0.145705	0.127	0.109224	0.0928246	0.0791753	0.0689771	0.0601937	0.0519842	0.0446035	0.0369984	0.0297803	0.0238659	0.0186778	0.0135131	0.00905463	0.0050348	0.00116243	-0.0029788	-0.00748924	-0.0120284	-0.0162426	-0.0214385	-0.0279834	-0.0350602	-0.0431116	-0.0522549	-0.0631811	-0.0751923	-0.0891033	-0.103834	-0.118852	-0.134466	-0.150185	-0.165974	-0.182255	-0.197844	-0.212122
0.0692291	0.14837	0.132566	0.117781	0.133601	0.154248	0.182269	0.197136	0.191526	0.185321	0.174436	0.161892	0.149359	0.138634	0.127344	0.116714	0.10669	0.097535	0.0885552	0.0805687	0.0721633	0.0651199	0.0581038	0.0519403	0.0459366	0.0397025	0.0336842	0.0264979	0.0202227	0.0128556	0.00681687	-0.000880883	-0.00788982	-0.0161881	-0.0240486	-0.0337925	-0.0437089	-0.0557336	-0.0682629	-0.0819224	-0.0958617	-0.110298	-0.126671	-0.140866	-0.156406	-0.169446	-0.181465	-0.190907	-0.197311	-0.199007
-0.014406	0.0210075	0.0912873	0.099	0.0705026	0.0936123	0.12447	0.139308	0.146647	0.148853	0.149397	0.141963	0.128379	0.11158	0.0993954	0.0888488	0.0779327	0.065678	0.0538551	0.043469	0.0349314	0.0282812	0.0222002	0.0174422	0.0136657	0.0106165	0.0076642	0.00428257	0.00128143	-0.00185289	-0.00498881	-0.00836886	-0.0116623	-0.015197	-0.0200529	-0.0250129	-0.0307678	-0.038252	-0.0468629	-0.0565491	-0.0680777	-0.0803396	-0.0916389	-0.102341	-0.113163	-0.124668	-0.136687	-0.149637	-0.162964	-0.17399
0.0380959	0.0988869	0.165959	0.185836	0.200508	0.223586	0.230242	0.226098	0.209476	0.191461	0.174813	0.156698	0.137849	0.118999	0.104473	0.0944273	0.0853761	0.0778841	0.0708433	0.0646059	0.0589728	0.053091	0.0477129	0.0421903	0.0382218	0.033768	0.0297601	0.0257887	0.0212844	0.0176306	0.0132078	0.00760585	0.0015516	-0.00501888	-0.0128328	-0.0214945	-0.0306216	-0.0414705	-0.0545774	-0.0697909	-0.0864274	-0.104645	-0.123325	-0.141866	-0.159357	-0.175905	-0.190698	-0.203795	-0.214831	-0.224243
0.0084341	0.0216994	0.103685	0.155463	0.117898	0.0983941	0.118222	0.141825	0.151082	0.145749	0.145149	0.139592	0.13097	0.124349	0.120765	0.119218	0.118194	0.115633	0.110835	0.104528	0.0969557	0.0889053	0.0797397	0.0716037	0.0630651	0.0538055	0.0454939	0.0370074	0.0287834	0.0209905	0.0136114	0.00635278	-0.000798027	-0.00763781	-0.0148595	-0.0229402	-0.0321574	-0.0421058	-0.0531067	-0.0656445	-0.0794344	-0.0944427	-0.110067	-0.12589	-0.141971	-0.158643	-0.175806	-0.192733	-0.208674	-0.222446
0.0488196	0.0362093	0.108279	0.104332	0.11291	0.140071	0.158028	0.161974	0.157743	0.147189	0.13814	0.120395	0.106331	0.0930074	0.0841159	0.0761117	0.0696486	0.0648209	0.0585365	0.0529703	0.0467487	0.0416841	0.0346824	0.0293202	0.0238822	0.0187841	0.0134275	0.0076399	0.0024674	-0.00312435	-0.00845687	-0.0148688	-0.0215306	-0.0292122	-0.0364353	-0.0437542	-0.0520765	-0.0614395	-0.072574	-0.0838618	-0.0971098	-0.110718	-0.125193	-0.139849	-0.154953	-0.170196	-0.185826	-0.202427	-0.218445	-0.231659
0.018046	0.0700029	0.125422	0.132953	0.116677	0.131805	0.153345	0.162938	0.169917	0.166895	0.158184	0.149383	0.138579	0.125305	0.112526	0.0993056	0.0851878	0.0708793	0.0568601	0.0445616	0.0350783	0.029379	0.025264	0.0211346	0.017059	0.0137151	0.0108905	0.00891714	0.00726051	0.0056009	0.00439412	0.00362653	0.00260951	0.00110082	-0.00165174	-0.00589107	-0.011947	-0.019368	-0.0288781	-0.0392728	-0.0520136	-0.0655414	-0.0809924	-0.0967464	-0.113107	-0.129513	-0.145934	-0.161971	-0.176744	-0.18678
0.0239354	0.0249974	0.0592647	0.0846796	0.0906915	0.104643	0.129079	0.151257	0.159968	0.162079	0.154739	0.14548	0.134661	0.121688	0.1107	0.101271	0.0938959	0.0884694	0.0834854	0.0777269	0.0717172	0.065087	0.0580224	0.0521688	0.0469235	0.0427848	0.0379377	0.0323037	0.0261303	0.0199789	0.0140207	0.00729241	-0.000384043	-0.00768714	-0.015561	-0.0236572	-0.0332829	-0.0441898	-0.0561547	-0.0693498	-0.0828038	-0.0971014	-0.112052	-0.12808	-0.145239	-0.162334	-0.179148	-0.194886	-0.208293	-0.219055
-0.0174888	0.0255207	0.0764444	0.101298	0.134196	0.159974	0.171174	0.185839	0.190458	0.185661	0.175516	0.160955	0.143882	0.12649	0.110149	0.0962538	0.0840809	0.0734862	0.0639364	0.0551509	0.046565	0.0384315	0.0310187	0.0248939	0.01934	0.01426	0.0102677	0.00664175	0.00295729	-0.000968371	-0.00457665	-0.00808847	-0.0111407	-0.0139701	-0.0165811	-0.0194281	-0.0224857	-0.0263182	-0.0310573	-0.0375442	-0.0455892	-0.0553876	-0.0660701	-0.0772605	-0.0893249	-0.102327	-0.115937	-0.13049	-0.145249	-0.158959
-0.015461	0.0348622	0.0949564	0.116745	0.115408	0.114316	0.132031	0.143321	0.147054	0.144566	0.142819	0.135697	0.122572	0.108804	0.0936008	0.0799888	0.0671524	0.0558033	0.0465288	0.0389567	0.03307	0.0284939	0.024837	0.0214651	0.0184424	0.0153192	0.0117954	0.00935202	0.00770934	0.006174	0.00457111	0.00215791	-0.00124225	-0.00570502	-0.0113603	-0.0185117	-0.026486	-0.0355358	-0.0464383	-0.0584507	-0.0722673	-0.0868117	-0.101984	-0.118207	-0.133935	-0.150342	-0.166594	-0.180513	-0.191945	-0.202072
0.0101986	0.0900619	0.133481	0.123921	0.106988	0.122162	0.165813	0.202405	0.21364	0.210128	0.202264	0.186834	0.171069	0.154528	0.13488	0.115493	0.096621	0.082719	0.0700253	0.0594031	0.0499118	0.0417394	0.0344648	0.027072	0.0204565	0.0152071	0.0117572	0.00942447	0.00735498	0.00520857	0.00232085	-0.000800899	-0.004083	-0.00794074	-0.0124204	-0.0174924	-0.0237259	-0.0312028	-0.0399063	-0.0512855	-0.0637657	-0.0785927	-0.0942787	-0.112616	-0.131369	-0.149259	-0.166596	-0.183498	-0.201727	-0.220182
0.0318867	0.073133	0.116614	0.146645	0.170815	0.18865	0.220724	0.229131	0.224317	0.212592	0.198568	0.187023	0.17062	0.154404	0.138966	0.124608	0.111724	0.099632	0.0888088	0.0786851	0.0689931	0.0595463	0.051273	0.0442603	0.0373528	0.0306216	0.0243984	0.0183064	0.0119172	0.00556841	-0.00124677	-0.00855496	-0.0161759	-0.0243697	-0.032745	-0.0415324	-0.0514123	-0.0630561	-0.0759921	-0.0899111	-0.104625	-0.119518	-0.134047	-0.149032	-0.16458	-0.180273	-0.195985	-0.211304	-0.225479	-0.236019
0.0415939	0.0819802	0.132373	0.177099	0.15422	0.141521	0.150222	0.149845	0.159883	0.166199	0.169993	0.169785	0.16327	0.156778	0.147223	0.136635	0.127952	0.119969	0.113432	0.105714	0.0975296	0.0887802	0.0805813	0.0728803	0.0658285	0.059397	0.0527247	0.0461877	0.0402318	0.0348461	0.0300858	0.0245593	0.0179416	0.0108384	0.00235365	-0.00713367	-0.017079	-0.0267695	-0.0363575	-0.046535	-0.0575337	-0.0696898	-0.082478	-0.0951464	-0.10798	-0.121366	-0.134594	-0.148503	-0.161623	-0.174065
0.00232151	0.0321613	0.0960345	0.112643	0.0867866	0.104394	0.132621	0.147067	0.144538	0.149755	0.150209	0.148651	0.147433	0.142295	0.136237	0.128722	0.120573	0.112356	0.103968	0.0951752	0.0870311	0.0787667	0.0706425	0.0621992	0.054452	0.0472191	0.0406073	0.0343121	0.0283845	0.0228565	0.0174188	0.0120262	0.00604784	-0.0009608	-0.00890932	-0.0177043	-0.0270564	-0.0371747	-0.0477526	-0.0596507	-0.072568	-0.0863303	-0.100491	-0.115519	-0.131007	-0.146763	-0.162348	-0.177376	-0.191263	-0.202518
0.0289837	0.0249427	0.026445	0.0684991	0.0917275	0.0889032	0.110094	0.148201	0.163824	0.165584	0.168868	0.165544	0.1583	0.147819	0.138152	0.128268	0.117442	0.107055	0.0966646	0.0867719	0.0775277	0.0689727	0.0608161	0.0532591	0.0465104	0.0401847	0.0341037	0.0282268	0.0223202	0.0161233	0.0098596	0.00364101	-0.00306341	-0.0104418	-0.0179198	-0.0262555	-0.0355274	-0.045605	-0.0559415	-0.0663656	-0.076632	-0.0871542	-0.0968768	-0.106437	-0.115826	-0.1257	-0.135613	-0.145445	-0.155541	-0.165892
-0.000307629	0.0218646	0.0611707	0.0529078	0.0570732	0.0870513	0.109363	0.129498	0.134756	0.143241	0.153676	0.149359	0.142512	0.130876	0.118713	0.108426	0.0999236	0.0929774	0.085604	0.0777764	0.0703537	0.0633002	0.0575559	0.0521945	0.0476541	0.0437506	0.0394016	0.0345596	0.0300287	0.0244437	0.019185	0.013784	0.00809706	0.00198527	-0.00375565	-0.00909309	-0.0159528	-0.0251442	-0.0358256	-0.047464	-0.0598221	-0.0719072	-0.0835334	-0.0948336	-0.106224	-0.11817	-0.130443	-0.142317	-0.153989	-0.164827
0.0252878	0.0393841	0.0671329	0.121288	0.141028	0.167289	0.201612	0.22195	0.233199	0.236134	0.23267	0.219338	0.202503	0.183273	0.163078	0.145338	0.130977	0.1172	0.102453	0.087688	0.0734954	0.0596976	0.0487041	0.0403409	0.0334901	0.0281465	0.0236281	0.0204649	0.0181836	0.0159984	0.0136024	0.0106565	0.00596971	-0.000258548	-0.00725584	-0.0153492	-0.0247222	-0.0363663	-0.0497267	-0.0651206	-0.0821037	-0.0982546	-0.114415	-0.129825	-0.144409	-0.158486	-0.172802	-0.187759	-0.202346	-0.215247
0.0509991	0.114302	0.179336	0.141427	0.120314	0.134904	0.146709	0.156103	0.168953	0.164989	0.155231	0.144747	0.134791	0.120664	0.107077	0.0962158	0.0860532	0.0779607	0.07121	0.0663815	0.0614656	0.0573416	0.0522068	0.0483424	0.0444259	0.0402886	0.0358005	0.0313085	0.0262017	0.020654	0.0129628	0.00307981	-0.00768538	-0.0196237	-0.031934	-0.0445883	-0.0573437	-0.0697192	-0.0819644	-0.0945694	-0.107836	-0.120821	-0.133199	-0.145252	-0.157727	-0.170834	-0.182798	-0.193221	-0.202407	-0.207636
-0.0130761	0.000665173	0.0544588	0.0765949	0.0724803	0.0760566	0.11439	0.142247	0.160126	0.163912	0.157304	0.146295	0.133634	0.122289	0.110428	0.0999716	0.0896263	0.0788809	0.0691426	0.0590064	0.0488683	0.0391036	0.0309617	0.0258514	0.0230169	0.0210315	0.0193335	0.0173758	0.0149606	0.0118237	0.00783538	0.00294725	-0.00325834	-0.0103848	-0.0183004	-0.0276715	-0.038731	-0.0511992	-0.0642959	-0.0778607	-0.091777	-0.10578	-0.120242	-0.134454	-0.148484	-0.16342	-0.178342	-0.194549	-0.209227	-0.220906
-0.0129342	0.0779917	0.148959	0.129651	0.128876	0.161504	0.182515	0.19358	0.189981	0.17719	0.165179	0.151385	0.136246	0.119946	0.103365	0.0881447	0.0753508	0.0668296	0.0606227	0.0535532	0.0446092	0.0352342	0.027344	0.0214821	0.0172535	0.0140728	0.0115662	0.00982648	0.00806549	0.00605181	0.00432527	0.00189186	-0.00189394	-0.00699819	-0.0130144	-0.0201386	-0.0294019	-0.0403234	-0.0534418	-0.0681912	-0.0840888	-0.099994	-0.11513	-0.129484	-0.143224	-0.157377	-0.171822	-0.186326	-0.200417	-0.212175
0.0269807	0.053111	0.0998776	0.0803817	0.0738767	0.0896468	0.111172	0.125033	0.129583	0.129763	0.126796	0.120718	0.114009	0.107919	0.103027	0.0970453	0.0904423	0.084083	0.0779499	0.0718494	0.0661573	0.0604396	0.0553691	0.0501726	0.0440912	0.0377715	0.0316387	0.0256941	0.0203354	0.0158002	0.0118048	0.0082659	0.00478841	0.000886945	-0.00337485	-0.00828139	-0.0143252	-0.0214303	-0.0291714	-0.037268	-0.0462563	-0.0561529	-0.0677954	-0.0808223	-0.0950416	-0.110135	-0.125753	-0.141405	-0.156492	-0.170379
[truncated: 50 more columns]

## Sheet: 2
0.0593462	0.0834981	0.116028	0.146829	0.174768	0.200143	0.220119	0.233491	0.239733	0.238553	0.231046	0.219262	0.204359	0.187079	0.168417	0.148722	0.12921	0.110848	0.0941549	0.0793348	0.0661601	0.0535689	0.0412809	0.029713	0.0191448	0.0100697	0.00255898	-0.00389358	-0.00973723	-0.0146733	-0.0190488	-0.0238124	-0.0291911	-0.0356764	-0.0440351	-0.0535275	-0.0637659	-0.0745776	-0.0864788	-0.0995867	-0.113524	-0.127922	-0.142504	-0.156841	-0.170964	-0.184325	-0.196365	-0.206036	-0.211379	-0.210683
0.0672242	0.0876324	0.109427	0.134578	0.155696	0.171253	0.181287	0.185458	0.184039	0.177902	0.168096	0.15571	0.141329	0.125888	0.110032	0.0948554	0.0809457	0.068295	0.0570176	0.047136	0.0387868	0.0322781	0.0238273	0.0174046	0.0110341	0.00477439	-0.00105452	-0.0064737	-0.0115653	-0.0163103	-0.0208637	-0.0254099	-0.0302339	-0.0355334	-0.041244	-0.0474205	-0.0539725	-0.0608624	-0.0680154	-0.0755267	-0.0834282	-0.0916567	-0.100084	-0.108455	-0.116576	-0.124243	-0.130983	-0.136176	-0.139694	-0.141196
0.062442	0.0858478	0.110486	0.136146	0.16111	0.182859	0.198742	0.208814	0.213226	0.21224	0.206568	0.196412	0.182616	0.166159	0.148457	0.13102	0.1143	0.0982487	0.0826455	0.0669626	0.0516375	0.0373055	0.0239244	0.0122254	0.00247705	-0.00582665	-0.0120451	-0.0166921	-0.0200639	-0.0226029	-0.0250123	-0.0278711	-0.0316674	-0.0363965	-0.0423895	-0.0502177	-0.0598901	-0.071127	-0.0835338	-0.0970445	-0.111751	-0.127569	-0.144522	-0.161462	-0.178834	-0.195529	-0.208357	-0.216978	-0.218406	-0.213118
0.125002	0.154068	0.182774	0.210049	0.234638	0.255203	0.269837	0.277845	0.279324	0.274412	0.265238	0.251014	0.232516	0.211474	0.188615	0.165692	0.142879	0.121021	0.0998682	0.080259	0.0625707	0.0461845	0.031999	0.0199244	0.00962439	0.00103222	-0.00586065	-0.0118157	-0.0168056	-0.0212079	-0.0254104	-0.0297154	-0.0343697	-0.0395653	-0.0456038	-0.0526975	-0.0616763	-0.0716501	-0.0828668	-0.0949294	-0.107743	-0.120796	-0.133987	-0.146846	-0.158719	-0.169179	-0.177506	-0.183252	-0.185618	-0.184388
0.0918492	0.115422	0.138253	0.159262	0.177388	0.191269	0.200282	0.2044	0.20354	0.198118	0.189101	0.177385	0.163826	0.148522	0.131896	0.114328	0.0960664	0.0774708	0.0596189	0.0427312	0.0273183	0.0139666	0.00277541	-0.00612105	-0.0127206	-0.0172607	-0.0202872	-0.0224999	-0.0244359	-0.026491	-0.0289202	-0.0317569	-0.0350618	-0.0389574	-0.0433086	-0.0483286	-0.0540975	-0.0606872	-0.068231	-0.0772573	-0.0876201	-0.0994902	-0.112221	-0.125619	-0.139936	-0.153491	-0.165769	-0.176092	-0.18359	-0.187376
0.0714759	0.0995872	0.12747	0.154592	0.176311	0.192647	0.202295	0.204451	0.200588	0.192871	0.182806	0.17101	0.158232	0.145474	0.133073	0.120373	0.107464	0.0929926	0.0773627	0.0618119	0.0480362	0.0359458	0.0256758	0.0163316	0.0076685	-0.000448886	-0.00836568	-0.0167645	-0.0260668	-0.0357006	-0.0444295	-0.0518412	-0.058347	-0.0644344	-0.070624	-0.0771131	-0.084638	-0.0939586	-0.105443	-0.118897	-0.133661	-0.148796	-0.16403	-0.179466	-0.195182	-0.210921	-0.225265	-0.236431	-0.242307	-0.241474
0.0635657	0.0895911	0.116802	0.143845	0.169313	0.191325	0.205552	0.213044	0.213611	0.207957	0.197233	0.182661	0.16513	0.145105	0.125491	0.106634	0.0892212	0.0736393	0.0600528	0.0480894	0.0376863	0.0284817	0.0205552	0.0139722	0.00878311	0.00491603	0.00234937	0.000905313	0.000192584	-0.000344594	-0.0013503	-0.00333239	-0.00612458	-0.0100327	-0.0153268	-0.0220857	-0.0300188	-0.0393688	-0.0501113	-0.0612317	-0.0731149	-0.0857939	-0.0994774	-0.112892	-0.126495	-0.139543	-0.151256	-0.160936	-0.167585	-0.170534
0.0710619	0.0928161	0.113109	0.131352	0.1445	0.153394	0.15739	0.157453	0.154515	0.149595	0.143327	0.135815	0.127017	0.116945	0.105797	0.0935341	0.080334	0.066959	0.0544745	0.0438225	0.0348827	0.0272286	0.020924	0.0151235	0.00950161	0.00374034	-0.00211408	-0.00771759	-0.0126029	-0.0164843	-0.0194326	-0.0219137	-0.0246384	-0.0279894	-0.0321532	-0.0373904	-0.0435781	-0.0505271	-0.0579199	-0.0652438	-0.0727837	-0.0808054	-0.0891424	-0.0979647	-0.107151	-0.116449	-0.125384	-0.133244	-0.138851	-0.141944
0.0977826	0.117322	0.136851	0.156053	0.173512	0.187143	0.196921	0.201607	0.200218	0.19533	0.187517	0.176714	0.163374	0.148177	0.131701	0.115086	0.0991356	0.0844296	0.0716959	0.0606263	0.0511246	0.0427071	0.0351353	0.0280929	0.0216884	0.0159622	0.0104499	0.00520303	0.000170408	-0.00451885	-0.00883143	-0.01295	-0.0172326	-0.0221422	-0.0280109	-0.0348927	-0.0428019	-0.0516806	-0.0616242	-0.0728385	-0.08498	-0.097855	-0.110734	-0.122659	-0.133315	-0.141908	-0.148115	-0.150861	-0.150448	-0.146133
0.0240799	0.0403553	0.0608501	0.0843629	0.107891	0.128239	0.143584	0.153533	0.158579	0.159154	0.155506	0.148199	0.137631	0.126899	0.116165	0.105503	0.0956956	0.0861365	0.0779541	0.0709578	0.0649251	0.0596916	0.0543666	0.0487723	0.0433431	0.0384897	0.0339549	0.0291505	0.0236589	0.0176486	0.0113233	0.00474066	-0.00188694	-0.00918046	-0.0172271	-0.0257654	-0.0345621	-0.0436097	-0.0530819	-0.0633558	-0.0742967	-0.0858817	-0.0966082	-0.108134	-0.120416	-0.134099	-0.146014	-0.15658	-0.164009	-0.167504
0.167115	0.216088	0.261778	0.298804	0.325754	0.341386	0.34432	0.336518	0.319845	0.296199	0.267514	0.235868	0.203627	0.171543	0.141055	0.111056	0.081941	0.0562517	0.0331318	0.0125179	-0.00496447	-0.0192073	-0.0294938	-0.0358412	-0.038874	-0.039772	-0.0397728	-0.0397422	-0.039962	-0.0405184	-0.0413681	-0.0424446	-0.0437752	-0.0455243	-0.0479472	-0.0513757	-0.0563138	-0.0631351	-0.0720877	-0.083201	-0.0962413	-0.110806	-0.126268	-0.142032	-0.157469	-0.171949	-0.185294	-0.196143	-0.20392	-0.207392
0.0820939	0.0999488	0.11673	0.132863	0.148832	0.163821	0.175715	0.183302	0.184211	0.17866	0.169559	0.157162	0.142282	0.126296	0.10852	0.0895561	0.0713054	0.054591	0.0400342	0.0281666	0.0185773	0.0101065	0.00239803	-0.00405412	-0.00983998	-0.014489	-0.0178522	-0.0204014	-0.0224804	-0.0243017	-0.0258603	-0.0273814	-0.0293124	-0.0322653	-0.0370252	-0.043692	-0.0522343	-0.062376	-0.0738327	-0.0862233	-0.0993779	-0.114074	-0.128869	-0.143262	-0.157409	-0.170761	-0.183007	-0.192386	-0.197708	-0.197636
0.0685147	0.105869	0.141394	0.18152	0.222	0.255181	0.280542	0.295149	0.303149	0.303813	0.296907	0.284489	0.268552	0.250755	0.233597	0.214744	0.195289	0.17381	0.151456	0.128962	0.107036	0.0869014	0.0702673	0.0563791	0.045441	0.0355591	0.0263273	0.018067	0.0102757	0.00233776	-0.00554968	-0.0129862	-0.0196045	-0.0266215	-0.0335992	-0.0432023	-0.0552116	-0.0682902	-0.0839625	-0.103669	-0.122909	-0.143194	-0.16506	-0.185583	-0.207614	-0.229529	-0.250266	-0.268748	-0.283783	-0.292843
0.0549881	0.0806185	0.112272	0.146105	0.180286	0.212791	0.240243	0.261855	0.274395	0.278351	0.275155	0.265423	0.249499	0.227873	0.202266	0.17442	0.14426	0.115631	0.0886688	0.0645583	0.0442267	0.0282169	0.0156343	0.00573268	-0.00225776	-0.00914323	-0.0147865	-0.0194831	-0.0237676	-0.027949	-0.0318707	-0.0354496	-0.0389899	-0.0430427	-0.0481277	-0.0543855	-0.0619459	-0.0705395	-0.0800155	-0.0905293	-0.101912	-0.114122	-0.127266	-0.141738	-0.157724	-0.175124	-0.193177	-0.210586	-0.225548	-0.23644
0.0343242	0.0564745	0.0808545	0.107003	0.133232	0.157427	0.177589	0.192224	0.200757	0.20392	0.202224	0.195747	0.184721	0.169982	0.152602	0.134505	0.116499	0.0997073	0.0845025	0.0712339	0.0601159	0.0510632	0.0436462	0.037016	0.0305303	0.0243087	0.0185444	0.0133471	0.00852398	0.00360333	-0.00156601	-0.00698892	-0.0130497	-0.0201198	-0.0285307	-0.0385506	-0.0500276	-0.0630694	-0.0769356	-0.0916975	-0.107277	-0.123155	-0.139336	-0.155764	-0.171734	-0.186911	-0.201984	-0.215985	-0.227242	-0.233413
0.0646921	0.0869842	0.109298	0.130916	0.151543	0.170135	0.184292	0.19263	0.195741	0.194658	0.190347	0.183192	0.173119	0.160327	0.145279	0.129665	0.113961	0.0988658	0.0848381	0.0715824	0.0593704	0.0486392	0.0396653	0.0323671	0.0260473	0.0200778	0.014463	0.00931182	0.00454434	-0.000210179	-0.005322	-0.0110124	-0.0172117	-0.0237385	-0.0306123	-0.0380167	-0.0462121	-0.0551601	-0.064755	-0.0749346	-0.0857239	-0.0972862	-0.109761	-0.123152	-0.137261	-0.151476	-0.165108	-0.176985	-0.185274	-0.188598
0.0354748	0.0538839	0.0756712	0.099082	0.123019	0.146011	0.165884	0.180327	0.188638	0.19165	0.190704	0.186106	0.177819	0.166188	0.152425	0.138002	0.123362	0.109158	0.0956167	0.0829634	0.071384	0.0610735	0.0520694	0.0441174	0.0368653	0.030026	0.0239845	0.0189182	0.0144902	0.00981439	0.00435443	-0.0017644	-0.00828162	-0.015246	-0.0231055	-0.0318214	-0.0425758	-0.0540493	-0.0661828	-0.0793482	-0.0933735	-0.10833	-0.124123	-0.14038	-0.156955	-0.173769	-0.190614	-0.206792	-0.220809	-0.230431
0.0710052	0.0975289	0.124519	0.151461	0.177583	0.199678	0.215299	0.222908	0.222661	0.215635	0.203511	0.188851	0.172496	0.154565	0.135875	0.116971	0.0990354	0.0827181	0.0680699	0.0546779	0.0421292	0.0299274	0.0183028	0.00792709	-0.000686604	-0.00773071	-0.0135348	-0.0186885	-0.0234638	-0.0279468	-0.0325874	-0.0380634	-0.0449481	-0.0534925	-0.0632707	-0.0734528	-0.0836765	-0.0940544	-0.105177	-0.117345	-0.130298	-0.143876	-0.157673	-0.171381	-0.185053	-0.198216	-0.209599	-0.217357	-0.219645	-0.215313
0.0875632	0.113696	0.141415	0.169026	0.194361	0.215692	0.230942	0.238585	0.239962	0.235935	0.22725	0.214303	0.19757	0.178366	0.157923	0.137496	0.117582	0.0977875	0.0791659	0.0615645	0.0455226	0.0314901	0.0196672	0.0100214	0.00220531	-0.004158	-0.00909851	-0.0129484	-0.01641	-0.0201523	-0.0247557	-0.0301597	-0.0365534	-0.0439428	-0.0525611	-0.062527	-0.0738653	-0.0861797	-0.0993426	-0.113349	-0.128853	-0.145073	-0.162473	-0.180759	-0.199403	-0.217477	-0.234209	-0.248144	-0.257105	-0.259814
0.0669229	0.0959736	0.127153	0.15838	0.186952	0.210062	0.225537	0.232014	0.229528	0.220766	0.207741	0.191393	0.173007	0.153733	0.134972	0.11782	0.102886	0.0892179	0.076127	0.0644408	0.0538877	0.0438547	0.0358921	0.0284639	0.0212917	0.0142974	0.00759772	0.00101883	-0.00605098	-0.0139535	-0.0221434	-0.0311745	-0.0408543	-0.0513126	-0.0628505	-0.0754026	-0.0889945	-0.103568	-0.119372	-0.135506	-0.152533	-0.170136	-0.187605	-0.204616	-0.21996	-0.233425	-0.244361	-0.250186	-0.248158	-0.235818
0.0677884	0.0920531	0.115762	0.138359	0.159353	0.17642	0.188049	0.192823	0.191254	0.184091	0.172954	0.159619	0.144844	0.129085	0.112864	0.0966714	0.081073	0.0663899	0.0528342	0.0402773	0.0286832	0.0181381	0.00891962	0.00132827	-0.00456273	-0.00906972	-0.0129139	-0.0165811	-0.0204093	-0.0245222	-0.0289248	-0.0342137	-0.0406136	-0.0480536	-0.0566075	-0.0655989	-0.0752211	-0.0851755	-0.0954584	-0.10661	-0.118706	-0.131686	-0.145557	-0.159916	-0.174669	-0.188316	-0.20054	-0.209646	-0.213239	-0.209993
0.0388476	0.0619855	0.0854961	0.108559	0.130794	0.15093	0.167081	0.177845	0.183247	0.184349	0.181419	0.174895	0.165191	0.152621	0.137872	0.122924	0.106856	0.0910859	0.0759989	0.0623258	0.0509147	0.0418719	0.0345106	0.0278099	0.02127	0.0147643	0.00841575	0.00220834	-0.00432884	-0.0109787	-0.0175334	-0.0238712	-0.0303235	-0.037189	-0.0448546	-0.053625	-0.0633947	-0.0738149	-0.0856221	-0.0982879	-0.111265	-0.124463	-0.137751	-0.151315	-0.16533	-0.179717	-0.193388	-0.20537	-0.214235	-0.218283
0.0114823	0.0319257	0.0558842	0.0825138	0.107725	0.130557	0.147998	0.159774	0.166354	0.168076	0.165355	0.158835	0.149231	0.136904	0.123135	0.109045	0.0954021	0.083355	0.0733799	0.0646481	0.0563425	0.0483131	0.0411083	0.0342896	0.0277764	0.0218009	0.0165981	0.0120344	0.00763549	0.00294974	-0.00209149	-0.00760273	-0.0135304	-0.0196433	-0.025912	-0.032471	-0.0396996	-0.047944	-0.0573648	-0.0678597	-0.0788368	-0.0900418	-0.101446	-0.112837	-0.124294	-0.136028	-0.148516	-0.161546	-0.173461	-0.182387
0.0296201	0.0475005	0.0681354	0.0893971	0.110453	0.130401	0.147717	0.160661	0.168537	0.171846	0.171268	0.167217	0.159684	0.149151	0.136477	0.122661	0.108467	0.0947454	0.0819601	0.0706857	0.0614486	0.0539949	0.0475492	0.0413854	0.0352378	0.0291914	0.0234877	0.0181697	0.0130416	0.00820341	0.00345915	-0.00141537	-0.0069131	-0.0137001	-0.0217328	-0.0309507	-0.0411154	-0.05199	-0.0633576	-0.0750427	-0.0869509	-0.0992526	-0.112249	-0.126202	-0.14091	-0.156214	-0.171825	-0.187216	-0.201431	-0.212722
0.015481	0.0371088	0.0643493	0.0931734	0.122068	0.148358	0.169867	0.18513	0.194132	0.197423	0.195494	0.189138	0.179254	0.166753	0.1526	0.136942	0.120808	0.10509	0.090449	0.0774899	0.0661195	0.0561913	0.0471324	0.0390037	0.0322838	0.0264701	0.0215406	0.0171569	0.0131433	0.00924264	0.00522939	0.000847428	-0.00404845	-0.00964101	-0.0162057	-0.0237528	-0.0323417	-0.0420993	-0.053322	-0.0662973	-0.0810605	-0.0970678	-0.114052	-0.131396	-0.148846	-0.166405	-0.183774	-0.200311	-0.214865	-0.225546
0.0493527	0.0655747	0.0832616	0.10168	0.119997	0.13676	0.149678	0.158584	0.162725	0.162378	0.15787	0.149626	0.138424	0.124916	0.109941	0.093938	0.0785304	0.0643696	0.051924	0.0407719	0.0319429	0.0251142	0.0198183	0.0157439	0.012356	0.00943773	0.00687994	0.00455	0.00250483	0.00041608	-0.00180217	-0.00433051	-0.00724154	-0.0107164	-0.0154262	-0.0213238	-0.028667	-0.0372148	-0.047097	-0.0581577	-0.0700611	-0.082722	-0.0960179	-0.109742	-0.123746	-0.137755	-0.151287	-0.16381	-0.17417	-0.181026
0.0737681	0.0975222	0.120296	0.143302	0.16644	0.188043	0.20571	0.217826	0.224078	0.224778	0.219892	0.209204	0.193382	0.174124	0.152979	0.132038	0.111702	0.0925697	0.0746468	0.0584933	0.0454975	0.035012	0.0274159	0.0215474	0.0167419	0.0128145	0.00932854	0.0056238	0.00106127	-0.00451877	-0.0109738	-0.0182701	-0.0266485	-0.0361827	-0.0468197	-0.0583088	-0.0706982	-0.0842449	-0.0984164	-0.113573	-0.12972	-0.146106	-0.162123	-0.178058	-0.194098	-0.210097	-0.22582	-0.239209	-0.248377	-0.250449
0.0349781	0.0559904	0.0771672	0.097148	0.11583	0.132597	0.145667	0.153397	0.155385	0.152908	0.147616	0.140294	0.131092	0.12032	0.108727	0.0969653	0.0855901	0.074583	0.0636519	0.0527843	0.0427088	0.0342056	0.0276747	0.0227752	0.0188014	0.0152513	0.01209	0.00923243	0.00622317	0.00251016	-0.00200768	-0.00693682	-0.012143	-0.0174464	-0.0231166	-0.0295025	-0.036935	-0.0457235	-0.0558695	-0.0674384	-0.0803724	-0.094294	-0.10852	-0.123	-0.137701	-0.151865	-0.166182	-0.179807	-0.190534	-0.195998
-0.00290971	0.0172665	0.0434106	0.0725388	0.103412	0.133689	0.160419	0.180857	0.193993	0.200471	0.200802	0.194852	0.18382	0.169046	0.152472	0.135012	0.117722	0.101593	0.0867112	0.0733484	0.0614605	0.0512186	0.0422943	0.0344815	0.0277183	0.022466	0.0192647	0.0168237	0.0143877	0.0114218	0.00804872	0.00435973	-2.89034e-05	-0.00534733	-0.0114836	-0.0184055	-0.0260029	-0.0343078	-0.0435511	-0.0540357	-0.0658311	-0.0788803	-0.0929626	-0.107773	-0.123194	-0.1389	-0.154715	-0.17076	-0.186559	-0.200884
0.0703952	0.0981219	0.127734	0.154223	0.178216	0.197753	0.210988	0.217638	0.218361	0.214206	0.205818	0.193774	0.178972	0.162683	0.145732	0.12881	0.112104	0.0956886	0.0804359	0.0676597	0.0570901	0.0476089	0.0385438	0.0301336	0.0229527	0.0169711	0.0116496	0.00653996	0.00176955	-0.00257636	-0.00703352	-0.0122054	-0.0183205	-0.0251729	-0.0327263	-0.0410763	-0.0500745	-0.0602076	-0.0708646	-0.0819053	-0.0938252	-0.106884	-0.121447	-0.136876	-0.15265	-0.167956	-0.182368	-0.194747	-0.20323	-0.207318
0.0365302	0.0593002	0.0836126	0.10775	0.130336	0.149999	0.164649	0.173687	0.177875	0.178093	0.17504	0.168934	0.160069	0.149106	0.136428	0.122527	0.108109	0.0941735	0.0818791	0.0708546	0.0628714	0.0566818	0.0510846	0.0452303	0.0392553	0.0337528	0.0285505	0.0237228	0.0193098	0.0160385	0.0134656	0.0110228	0.00787711	0.00336717	-0.00275524	-0.00986262	-0.0183967	-0.0275931	-0.0368009	-0.0458685	-0.0548599	-0.0642915	-0.0746904	-0.086189	-0.0992459	-0.113305	-0.12839	-0.143033	-0.156847	-0.16778
0.0774496	0.102073	0.127946	0.153918	0.178718	0.200552	0.216703	0.22542	0.227514	0.224388	0.218397	0.210142	0.199068	0.185535	0.170528	0.155111	0.137683	0.120583	0.102991	0.0853517	0.0684987	0.0531488	0.0397041	0.0280344	0.0174188	0.00780662	-0.000689772	-0.00806187	-0.0146387	-0.0213208	-0.0277122	-0.0343001	-0.0403145	-0.0458655	-0.0517498	-0.0585267	-0.0666002	-0.0762286	-0.087691	-0.101058	-0.116559	-0.134027	-0.151904	-0.171091	-0.190661	-0.210102	-0.228601	-0.244483	-0.255689	-0.260465
0.0567443	0.0802284	0.106284	0.134392	0.163673	0.192205	0.217165	0.235037	0.244516	0.24565	0.241125	0.23141	0.216724	0.197907	0.176569	0.155761	0.133425	0.111824	0.0932537	0.0761397	0.0609176	0.0480372	0.0375209	0.0288465	0.0216396	0.0153827	0.0101482	0.00598635	0.00256544	-0.000967579	-0.00517051	-0.0100815	-0.0159157	-0.0224054	-0.0296204	-0.0381435	-0.0482341	-0.0596003	-0.0717014	-0.0852274	-0.0994034	-0.115374	-0.133047	-0.150864	-0.169521	-0.188495	-0.20731	-0.22535	-0.239973	-0.248681
0.0457906	0.0674765	0.0906172	0.114159	0.136357	0.155548	0.169497	0.177693	0.180618	0.178924	0.172682	0.162092	0.148476	0.132259	0.114293	0.0955252	0.0771407	0.0605341	0.0467491	0.0360172	0.027684	0.020867	0.0146143	0.00879285	0.00321541	-0.00228168	-0.00773655	-0.0125415	-0.0163733	-0.019336	-0.021985	-0.0249915	-0.0288231	-0.0334749	-0.0388852	-0.0451153	-0.0520713	-0.0595842	-0.0675411	-0.0765415	-0.086849	-0.0986817	-0.111665	-0.125683	-0.140161	-0.154949	-0.169616	-0.183422	-0.195111	-0.202598
0.0205486	0.039286	0.0618661	0.088549	0.118705	0.149335	0.175553	0.195885	0.209855	0.217555	0.218688	0.212861	0.201081	0.185423	0.168046	0.15009	0.132077	0.114973	0.0985254	0.0839362	0.070754	0.0580604	0.0456494	0.0341651	0.0247548	0.016936	0.010659	0.005287	0.000592791	-0.00379809	-0.00850564	-0.0141102	-0.0210951	-0.0293117	-0.0385224	-0.0482586	-0.0588502	-0.0704459	-0.0837022	-0.0983355	-0.113977	-0.130996	-0.149375	-0.168597	-0.187522	-0.205874	-0.222579	-0.23723	-0.248167	-0.253442
0.0352631	0.058237	0.0829539	0.107221	0.130694	0.152681	0.171697	0.18693	0.197563	0.203567	0.204609	0.200236	0.191147	0.17762	0.160658	0.141453	0.121244	0.101038	0.0821257	0.0656376	0.0521868	0.0412707	0.0319164	0.0234527	0.0156246	0.00854337	0.00207393	-0.00351139	-0.00796578	-0.0112955	-0.0140117	-0.0167787	-0.0200985	-0.0242914	-0.0295458	-0.0361419	-0.04396	-0.0531145	-0.0632822	-0.0742364	-0.0859812	-0.0989551	-0.113424	-0.129407	-0.146537	-0.164729	-0.182977	-0.200889	-0.216601	-0.227371
0.037165	0.0585097	0.08085	0.104463	0.127753	0.149485	0.165352	0.17492	0.179356	0.180067	0.177413	0.171377	0.162644	0.152446	0.141959	0.131798	0.121117	0.10978	0.0982996	0.0873181	0.0771062	0.0669788	0.0562673	0.0460992	0.0366448	0.0279212	0.0194776	0.0112625	0.0036113	-0.00312793	-0.00927363	-0.0155083	-0.0219972	-0.0287745	-0.0360006	-0.0437986	-0.0527819	-0.0628368	-0.0740223	-0.0858163	-0.0986245	-0.112321	-0.127644	-0.142953	-0.158367	-0.173713	-0.18829	-0.20158	-0.211454	-0.215716
0.0490983	0.0694622	0.0898725	0.109544	0.128092	0.143846	0.155217	0.161981	0.164971	0.165025	0.162515	0.157088	0.148768	0.138515	0.12688	0.11362	0.0993769	0.0847452	0.0705576	0.0579008	0.047759	0.0401968	0.0341151	0.0289607	0.0243799	0.0202932	0.0166484	0.012916	0.00874659	0.00483113	0.00168308	-0.000894165	-0.00350928	-0.0068493	-0.0114328	-0.0172767	-0.0246513	-0.033548	-0.0439997	-0.0552685	-0.0665351	-0.0774615	-0.0883142	-0.0993186	-0.110959	-0.123041	-0.135529	-0.148188	-0.159734	-0.168644
0.0498677	0.0785035	0.108496	0.137541	0.164513	0.186364	0.200019	0.205818	0.205604	0.200491	0.190664	0.176699	0.161712	0.146814	0.132618	0.118257	0.103894	0.0906816	0.0786691	0.0676462	0.0574775	0.048617	0.0411255	0.03428	0.0274342	0.0208249	0.0150208	0.00954202	0.00385914	-0.00183865	-0.00719103	-0.0123786	-0.0182269	-0.0253137	-0.0337234	-0.0427747	-0.0527532	-0.0640142	-0.076802	-0.0907312	-0.105894	-0.122637	-0.139857	-0.15776	-0.174876	-0.190822	-0.205054	-0.216549	-0.223209	-0.222709
0.0133252	0.0322248	0.054493	0.078112	0.101161	0.12117	0.13679	0.146791	0.152034	0.152934	0.14958	0.142729	0.133684	0.123897	0.114412	0.10561	0.0975596	0.0903196	0.0836411	0.0772719	0.0712997	0.0652217	0.0593746	0.0538575	0.0484501	0.042733	0.036809	0.0306435	0.0242938	0.0171773	0.00965836	0.00165425	-0.00646317	-0.0146639	-0.0231141	-0.0319527	-0.0412604	-0.0513856	-0.0618208	-0.073101	-0.0852419	-0.0981056	-0.111471	-0.12519	-0.139289	-0.153788	-0.168799	-0.183666	-0.196954	-0.205843
0.059839	0.0839345	0.107789	0.129887	0.148817	0.162651	0.170367	0.17239	0.169838	0.163884	0.156034	0.146318	0.135505	0.124319	0.113171	0.10231	0.0918723	0.0815897	0.0722254	0.0638221	0.0565838	0.0499232	0.0434541	0.0369861	0.0305744	0.0241059	0.0174149	0.0105344	0.00365931	-0.00302667	-0.00957953	-0.0162477	-0.0234167	-0.0311172	-0.0395803	-0.0488621	-0.058911	-0.069795	-0.081158	-0.0931368	-0.105198	-0.117941	-0.131089	-0.145168	-0.159756	-0.174587	-0.189184	-0.202056	-0.21087	-0.213098
0.0248583	0.0461671	0.0697728	0.0925693	0.114115	0.13534	0.1529	0.16599	0.174228	0.177959	0.177194	0.171684	0.161853	0.148825	0.133985	0.117454	0.100954	0.0844975	0.0691875	0.0560576	0.0451567	0.0361004	0.0283602	0.021795	0.0168842	0.0131532	0.0102111	0.00820588	0.00688686	0.00574035	0.00450874	0.00304528	0.00120482	-0.00133846	-0.00497409	-0.0100413	-0.0171888	-0.0258315	-0.0362068	-0.0482853	-0.0619067	-0.0768989	-0.093419	-0.1104	-0.127887	-0.14573	-0.164004	-0.182181	-0.198364	-0.209905
0.0665957	0.0868934	0.10871	0.131872	0.154631	0.175453	0.192359	0.204293	0.210997	0.212419	0.208209	0.198527	0.184525	0.168431	0.152734	0.138048	0.124248	0.11203	0.100847	0.090497	0.0805902	0.0711222	0.0621527	0.0539461	0.0469249	0.0409994	0.036188	0.032045	0.0282169	0.0241877	0.0192277	0.0126807	0.00486216	-0.00411009	-0.0133123	-0.0226422	-0.0323238	-0.0427949	-0.0538287	-0.0657926	-0.0785384	-0.091407	-0.104592	-0.118349	-0.131697	-0.144863	-0.157257	-0.168439	-0.17823	-0.186025
0.0125548	0.0282361	0.0500657	0.0763642	0.105476	0.132891	0.155787	0.173652	0.185306	0.189652	0.188035	0.181317	0.170631	0.156454	0.140757	0.124151	0.107945	0.091953	0.0779755	0.0658469	0.0555515	0.0465168	0.0379801	0.0300354	0.0222649	0.0150825	0.00808975	0.00172776	-0.00346058	-0.00791579	-0.0118538	-0.0157131	-0.0195626	-0.0236539	-0.028026	-0.0326456	-0.0375382	-0.0424521	-0.0478672	-0.0541513	-0.0616764	-0.0705884	-0.0806394	-0.0918417	-0.104047	-0.116914	-0.130365	-0.143878	-0.157719	-0.170893
0.0239677	0.0446083	0.0679745	0.0920039	0.114936	0.136595	0.155808	0.170288	0.180449	0.186041	0.187074	0.18326	0.174661	0.161944	0.146315	0.129055	0.111096	0.0936851	0.0775372	0.0636603	0.0522956	0.0427021	0.0339348	0.0256772	0.0183485	0.0121231	0.00689595	0.00270443	-0.000451324	-0.00293665	-0.00528259	-0.00788573	-0.0108927	-0.014197	-0.0177084	-0.0214019	-0.0254648	-0.0297745	-0.0349882	-0.0414089	-0.0496171	-0.0600865	-0.0725987	-0.086698	-0.101612	-0.117166	-0.132857	-0.148234	-0.162979	-0.176281
0.0372981	0.0607185	0.0846278	0.107704	0.130459	0.153442	0.174236	0.190464	0.200995	0.206504	0.20788	0.204997	0.197091	0.184146	0.167697	0.149294	0.130339	0.111953	0.0947422	0.0794213	0.0664913	0.0562133	0.0478554	0.0402169	0.0326096	0.0253869	0.0193372	0.0145123	0.0105108	0.00683575	0.00384734	0.00154622	-0.000691507	-0.00365689	-0.00813736	-0.0141565	-0.0214959	-0.0298216	-0.0392284	-0.04966	-0.0613058	-0.0736651	-0.0866856	-0.100687	-0.115817	-0.132363	-0.149845	-0.167469	-0.184576	-0.199386
0.0313518	0.0590154	0.0912901	0.124455	0.158081	0.189503	0.215962	0.23449	0.245303	0.247993	0.243711	0.233362	0.218189	0.199002	0.178457	0.157605	0.137537	0.119407	0.102401	0.0870101	0.0734301	0.061833	0.0518773	0.0435435	0.0368797	0.0316705	0.0273057	0.0230846	0.0185192	0.013681	0.00857387	0.00282705	-0.00363834	-0.010735	-0.0184507	-0.0268758	-0.0361748	-0.0466473	-0.0586933	-0.0719475	-0.0864717	-0.10215	-0.118284	-0.13491	-0.15122	-0.167285	-0.183235	-0.198611	-0.212614	-0.223182
0.0339804	0.0545739	0.0731429	0.0879762	0.10002	0.109377	0.116072	0.120747	0.124173	0.126171	0.126065	0.123622	0.119224	0.112406	0.103573	0.0933391	0.0825352	0.0727419	0.0649927	0.0590029	0.0538376	0.0484948	0.0429339	0.03724	0.0313635	0.0255494	0.0205369	0.0166061	0.0132048	0.00957367	0.00539551	0.000284256	-0.00598049	-0.0134774	-0.0219382	-0.0306892	-0.0393289	-0.0480327	-0.0577207	-0.0690977	-0.081911	-0.095515	-0.109314	-0.122886	-0.135701	-0.147707	-0.15943	-0.171364	-0.183464	-0.194347
0.00158237	0.0161606	0.0317877	0.047179	0.0622009	0.0768871	0.0902655	0.101343	0.109932	0.116296	0.120085	0.121149	0.119579	0.11586	0.110681	0.10448	0.0976943	0.0906198	0.0839941	0.0784669	0.0737628	0.0690399	0.0640464	0.0587657	0.0534854	0.0482366	0.0432427	0.0385057	0.0340931	0.0296529	0.0248306	0.0195707	0.0139136	0.00768388	0.000946003	-0.00625566	-0.0138131	-0.0216339	-0.0296741	-0.0382809	-0.0479066	-0.0586352	-0.0703347	-0.0829099	-0.0963105	-0.11004	-0.124206	-0.138509	-0.152793	-0.165569
0.0192642	0.0342853	0.0519805	0.0703965	0.0888968	0.106173	0.121526	0.133911	0.142618	0.147378	0.148176	0.145111	0.138153	0.127549	0.114643	0.100708	0.0870828	0.0748078	0.0643534	0.0558506	0.0486238	0.0419592	0.0357012	0.0301621	0.0252046	0.0212158	0.018013	0.0152621	0.0124935	0.00917528	0.00513345	6.27122e-05	-0.00594125	-0.0127555	-0.0199176	-0.0274596	-0.0353832	-0.0439795	-0.0533851	-0.0637723	-0.0747742	-0.0858484	-0.0962838	-0.10638	-0.115963	-0.125235	-0.134559	-0.143869	-0.152255	-0.158151
0.00966824	0.0248952	0.0428592	0.0617388	0.0822856	0.104415	0.126291	0.14609	0.162395	0.174334	0.180631	0.180187	0.172662	0.159082	0.142226	0.124354	0.10836	0.0957668	0.0864398	0.0785755	0.070229	0.0608965	0.051348	0.0425436	0.0352033	0.0300326	0.0267253	0.024256	0.0212683	0.0168064	0.0106803	0.00361055	-0.00373169	-0.0101308	-0.0154637	-0.0204542	-0.026592	-0.0350679	-0.045534	-0.0576108	-0.0702071	-0.0824603	-0.0937459	-0.104355	-0.114757	-0.125746	-0.137565	-0.150097	-0.162769	-0.174376
0.0287654	0.0477867	0.0724686	0.100418	0.129506	0.157463	0.181384	0.199971	0.213135	0.220795	0.222561	0.218501	0.209452	0.196749	0.181048	0.162873	0.144624	0.126897	0.1107	0.0965836	0.0839811	0.0724394	0.0617628	0.0519674	0.0429484	0.0347868	0.0280495	0.023046	0.0195444	0.0166446	0.013491	0.00947008	0.00435984	-0.00188329	-0.00903479	-0.0166404	-0.024446	-0.0330402	-0.0431722	-0.0554691	-0.069795	-0.085376	-0.101817	-0.118311	-0.134213	-0.149082	-0.163034	-0.176483	-0.189146	-0.199838
0.042616	0.0708536	0.0980932	0.121608	0.14257	0.162045	0.177754	0.188677	0.194735	0.197233	0.19629	0.191066	0.181601	0.169174	0.154855	0.139598	0.123288	0.106561	0.0915449	0.0793441	0.0700406	0.0618677	0.0537152	0.0457841	0.0386265	0.0319496	0.0253357	0.0186557	0.0123096	0.00619908	-0.000192097	-0.00754995	-0.0159278	-0.0255188	-0.0365307	-0.0491768	-0.0632574	-0.0779972	-0.0927924	-0.107606	-0.122917	-0.138921	-0.154844	-0.169983	-0.184284	-0.197999	-0.211545	-0.223615	-0.232319	-0.234668
0.0319476	0.0492645	0.068049	0.0869182	0.107887	0.127825	0.144872	0.15762	0.166354	0.171465	0.172678	0.169397	0.161755	0.150882	0.137896	0.12334	0.108256	0.0936226	0.0803523	0.069096	0.0596777	0.0509963	0.0427079	0.0350186	0.0286402	0.0235191	0.0190607	0.015061	0.0118223	0.00919999	0.0063618	0.00233258	-0.00349538	-0.0108807	-0.0196861	-0.0296067	-0.0404218	-0.0519179	-0.0637988	-0.0761149	-0.0892353	-0.103554	-0.119085	-0.135081	-0.151075	-0.167284	-0.183831	-0.199582	-0.213096	-0.221314
0.0250372	0.0520759	0.0773489	0.102071	0.12685	0.148961	0.164054	0.173846	0.178582	0.178922	0.174392	0.165135	0.15229	0.137144	0.122347	0.106483	0.0907951	0.0759723	0.0635669	0.0528996	0.0425749	0.0325615	0.0236217	0.015853	0.00894998	0.002878	-0.00199315	-0.00581488	-0.00890814	-0.0117326	-0.0141627	-0.0163481	-0.0186506	-0.0216133	-0.025448	-0.0299766	-0.0351983	-0.0422281	-0.0512618	-0.0633171	-0.0764388	-0.0910163	-0.106595	-0.122126	-0.138232	-0.153725	-0.16922	-0.184059	-0.196758	-0.205506
0.0189795	0.0336359	0.0477688	0.0606263	0.0728222	0.0839355	0.0938261	0.103287	0.112588	0.120366	0.124854	0.125466	0.121965	0.115045	0.105909	0.0964905	0.0884455	0.0824023	0.0768639	0.0704456	0.0625012	0.0537182	0.044979	0.0371671	0.031103	0.0274204	0.0248983	0.0221719	0.0183206	0.0132316	0.00742474	0.001806	-0.00259461	-0.00544257	-0.0073648	-0.00989782	-0.0144314	-0.0210981	-0.0292689	-0.0383141	-0.0477845	-0.0572709	-0.0671075	-0.0782074	-0.0913917	-0.106293	-0.123009	-0.140252	-0.156414	-0.170024
[truncated: 50 more columns]
