# Supplementary material for: Comparison of sagittal plane gait characteristics between the overground and treadmill approach for gait analysis in typically developing children
Source: PeerJ. 2022 Jul 22;10:e13752. doi: 10.7717/peerj.13752 (PMC9310770; doi:10.7717/peerj.13752)
Supplement: Supplemental Information 5 — Each colum represents a percentage of the gait cycle (0–100%). Every raw represents data of one child.Sheet 1 data of the overground approachSheet 2 data of the treadmill approach [file peerj-10-13752-s005.xlsx]

## Sheet: 1
5.72107	7.10806	8.76757	10.6016	12.5061	14.3756	16.1139	17.6442	18.9108	19.8803	20.5826	21.021	21.23	21.2506	21.1242	20.8874	20.5704	20.1983	19.7907	19.3622	18.9235	18.4854	18.047	17.6058	17.1659	16.728	16.2942	15.868	15.45	15.0513	14.6773	14.3311	14.0157	13.7323	13.4814	13.2633	13.0787	12.9303	12.8223	12.7607	12.7221	12.7739	12.8946	13.0909	13.3688	13.7347	14.195	14.7586	15.4363	16.242
13.1046	15.0046	17.3277	19.9256	22.6278	25.2616	27.6884	29.8269	31.6457	33.1431	34.3256	35.1902	35.7175	35.8826	35.6715	35.0962	34.1957	33.0273	31.6555	30.1444	28.5561	26.9462	25.362	23.8408	22.4074	21.0773	19.8589	18.7559	17.7678	16.8889	16.1105	15.4191	14.7998	14.237	13.7158	13.2196	12.7414	12.2746	11.8203	11.3822	10.9797	10.6246	10.3435	10.1564	10.0859	10.1546	10.3846	10.7975	11.4131	12.2478
7.99041	8.68412	9.69229	10.9348	12.3368	13.8186	15.294	16.7043	18.0234	19.219	20.2524	21.0973	21.7377	22.1676	22.3913	22.4068	22.2417	21.9334	21.5137	21.0205	20.4941	19.9679	19.4621	18.9906	18.5577	18.1531	17.7709	17.4055	17.0513	16.6977	16.3386	15.9669	15.5788	15.1709	14.745	14.3059	13.8619	13.4262	13.0158	12.6547	12.3653	12.1701	12.0996	12.1715	12.4023	12.8062	13.4018	14.2005	15.2117	16.4328
3.52363	4.45242	5.52711	6.71566	7.99551	9.34423	10.7321	12.1179	13.4501	14.6721	15.7307	16.5823	17.1982	17.5656	17.6869	17.5756	17.2509	16.7353	16.0527	15.2259	14.2838	13.2562	12.1765	11.0806	10.005	8.98237	8.03964	7.19584	6.46147	5.83969	5.32635	4.91193	4.58425	4.33016	4.13785	3.99829	3.90614	3.86035	3.86275	3.91869	4.03596	4.22481	4.49696	4.86641	5.34849	5.96157	6.72222	7.64771	8.75337	10.0527
14.7819	16.2923	18.1826	20.3372	22.63	24.9217	27.0414	28.9073	30.4901	31.7733	32.7407	33.3904	33.738	33.7914	33.5609	33.0655	32.3371	31.4303	30.3825	29.2416	28.04	26.8185	25.6026	24.4188	23.2858	22.2207	21.2385	20.3487	19.5512	18.8462	18.2395	17.7205	17.2811	16.9112	16.6035	16.3615	16.1691	16.0195	15.9129	15.8528	15.8364	15.8721	15.9709	16.14	16.3903	16.7371	17.1961	17.792	18.5324	19.4411
7.69519	8.14885	9.16693	10.7172	12.7764	15.2725	18.0951	21.0193	23.7967	26.2058	28.1272	29.4836	30.2695	30.5533	30.3958	29.8532	29.004	27.943	26.7672	25.56	24.3906	23.3131	22.3359	21.4449	20.6231	19.85	19.1142	18.4193	17.7674	17.1817	16.672	16.2705	15.969	15.7839	15.7026	15.7056	15.7589	15.8331	15.8989	15.9329	15.9218	15.8668	15.7789	15.6786	15.6046	15.5848	15.6551	15.8496	16.1977	16.7411
1.04404	2.56382	4.46241	6.62577	8.92788	11.2558	13.4945	15.5598	17.4203	19.0386	20.3754	21.3958	22.074	22.411	22.4395	22.1836	21.6758	20.9466	20.0555	19.039	17.9303	16.7522	15.5247	14.264	12.9888	11.7184	10.4749	9.27674	8.143	7.0888	6.12344	5.25178	4.477	3.806	3.23543	2.76426	2.38708	2.1067	1.9223	1.83397	1.84308	1.95606	2.18405	2.54023	3.0446	3.71096	4.56214	5.62001	6.90034	8.44255
5.41836	6.36015	7.58167	8.98952	10.4978	12.0318	13.5301	14.9425	16.222	17.3366	18.2608	18.9773	19.4817	19.7829	19.8729	19.7754	19.515	19.1218	18.6229	18.0439	17.4079	16.7388	16.0519	15.3564	14.6581	13.9601	13.2646	12.5745	11.8939	11.2272	10.5804	9.9595	9.36886	8.8132	8.2956	7.82014	7.39101	7.01686	6.70594	6.468	6.31566	6.26134	6.32125	6.51053	6.84398	7.34022	8.0143	8.88129	9.96048	11.2689
0.668294	1.9885	3.53637	5.33591	7.31171	9.26758	11.0767	12.6188	13.8485	14.7837	15.4912	15.9512	16.1787	16.1539	15.9218	15.529	15.027	14.489	13.8666	13.1824	12.4367	11.627	10.7898	9.921	9.01094	8.10013	7.18923	6.27678	5.36956	4.45889	3.56295	2.68939	1.85379	1.05492	0.322771	-0.345384	-0.923386	-1.39708	-1.73832	-1.95355	-1.99956	-1.86396	-1.5845	-1.13041	-0.500013	0.270136	1.19191	2.26575	3.47088	4.83154
14.7851	15.977	17.3406	19.6279	22.2669	24.2386	25.148	25.3636	25.7785	26.7338	28.0341	29.1052	29.502	29.6181	29.6101	29.2032	28.6449	27.892	27.1008	26.4603	25.8284	25.1655	24.4093	23.5818	22.6834	21.6933	20.7214	19.755	18.8374	17.9691	17.1413	16.3299	15.4993	14.682	13.8764	13.0764	12.2781	11.471	10.6769	9.94997	9.33703	8.84541	8.57691	8.52514	8.75287	9.26179	9.99957	10.8671	11.8981	13.0694
-3.58417	-2.97065	-2.14022	-1.09052	0.207057	1.66801	3.2717	4.99473	6.87343	8.5925	9.96362	11.0097	11.7848	12.3316	12.6527	12.7116	12.6918	12.9988	13.0393	12.9566	12.8698	12.6937	12.4131	12.0339	11.6841	11.3559	11.0643	10.8494	10.6049	10.3878	10.2781	10.0984	9.84143	9.55585	9.29838	8.99026	8.69929	8.37757	8.05536	7.84542	7.66048	7.46516	7.36642	7.40122	7.54765	7.80398	8.24341	8.84133	9.60155	10.6403
15.9676	16.5801	17.4457	18.5586	19.8669	21.261	22.6529	23.9682	25.1547	26.1134	26.8409	27.3034	27.4729	27.3823	27.0236	26.4257	25.6167	24.6223	23.4796	22.2226	20.882	19.4938	18.0898	16.6961	15.3469	14.0531	12.8384	11.7183	10.6959	9.78775	8.98836	8.3048	7.73176	7.26438	6.90259	6.638	6.47233	6.40185	6.42422	6.55131	6.78512	7.13385	7.61382	8.24767	9.0353	10.0041	11.182	12.5665	14.187	16.0396
5.98631	7.46125	9.48999	11.9537	14.6801	17.5027	20.2211	22.6736	24.7199	26.2739	27.3131	27.8048	27.8256	27.4535	26.7389	25.7284	24.5364	23.226	21.8329	20.3942	18.9456	17.4917	16.1197	14.8389	13.6464	12.5498	11.5489	10.644	9.84988	9.13294	8.48798	7.90989	7.37038	6.85288	6.34739	5.85635	5.3611	4.84787	4.33923	3.845	3.38908	2.99189	2.68086	2.48863	2.437	2.5732	2.90864	3.45667	4.2485	5.28865
1.59052	2.82845	4.38729	6.18685	8.13143	10.0745	11.9612	13.7624	15.3694	16.6966	17.7036	18.3678	18.6699	18.6375	18.3286	17.7934	17.0876	16.2568	15.3497	14.4123	13.5026	12.6565	11.9102	11.2853	10.7715	10.3596	10.0387	9.78512	9.57632	9.39208	9.18302	8.94218	8.66764	8.36166	8.01737	7.63545	7.22991	6.81006	6.39417	5.99289	5.64586	5.3665	5.1699	5.0942	5.18073	5.44768	5.91788	6.61548	7.60281	8.85095
6.04287	7.13981	8.60023	10.3372	12.2826	14.3621	16.475	18.5	20.3116	21.8281	23.0191	23.883	24.4306	24.6716	24.6126	24.2639	23.649	22.8041	21.7799	20.6359	19.4289	18.2084	17.0129	15.8697	14.7969	13.8045	12.8923	12.0594	11.3042	10.6226	10.0097	9.46286	8.97763	8.54682	8.15767	7.79895	7.46009	7.13474	6.82571	6.54482	6.3115	6.1508	6.09278	6.16818	6.40508	6.83135	7.46835	8.33542	9.45435	10.8432
-1.34518	-0.570051	0.491191	1.77723	3.22153	4.75545	6.31181	7.8283	9.25055	10.5342	11.6459	12.5637	13.2754	13.7777	14.0754	14.1805	14.1075	13.8749	13.502	13.007	12.4102	11.7294	10.9816	10.1819	9.34395	8.48	7.60061	6.71458	5.82963	4.95233	4.08831	3.24273	2.4207	1.62741	0.8686	0.150955	-0.517315	-1.12641	-1.66589	-2.12366	-2.48556	-2.73519	-2.8583	-2.83863	-2.65989	-2.30493	-1.75907	-1.00664	-0.036254	1.16074
3.07721	4.22482	5.62887	7.21797	8.89244	10.5666	12.1657	13.6543	14.9901	16.1486	17.1193	17.8976	18.475	18.8651	19.0751	19.1214	19.02	18.7965	18.4734	18.0703	17.6125	17.114	16.5928	16.0601	15.5217	14.9849	14.4507	13.9209	13.3954	12.8744	12.3586	11.8499	11.3507	10.8652	10.3994	9.96007	9.55533	9.19439	8.88662	8.6397	8.46591	8.37243	8.3662	8.45384	8.64301	8.93183	9.33383	9.85175	10.4927	11.2658
9.29477	10.339	11.6126	13.0062	14.4308	15.8057	17.0646	18.155	19.0403	19.6978	20.1198	20.3076	20.2681	20.0166	19.5763	18.9827	18.2804	17.5193	16.7444	15.9925	15.2923	14.6525	14.0711	13.5379	13.0386	12.5569	12.0765	11.5824	11.0729	10.5583	10.0554	9.58047	9.14662	8.76313	8.43425	8.15972	7.93289	7.74502	7.59102	7.47043	7.38307	7.32462	7.27628	7.25774	7.28423	7.36613	7.51381	7.75264	8.11099	8.62167
10.4882	11.4813	12.845	14.504	16.3566	18.2965	20.2145	22.0086	23.5919	24.9001	25.8972	26.5718	26.9321	27.0002	26.8051	26.384	25.7798	25.043	24.2244	23.3719	22.5233	21.7042	20.9261	20.1889	19.4795	18.7797	18.0719	17.3441	16.5914	15.8175	15.0322	14.2507	13.4906	12.7689	12.1014	11.502	10.9831	10.5567	10.2334	10.0225	9.93385	9.97644	10.1552	10.4735	10.9328	11.5355	12.281	13.1717	14.2129	15.4132
0.843372	1.54298	2.56439	3.85674	5.3359	6.89904	8.44773	9.91918	11.2903	12.5344	13.5676	14.394	14.9912	15.3276	15.4166	15.3021	15.0345	14.6674	14.2409	13.7714	13.2709	12.744	12.1878	11.6151	11.049	10.4925	9.94789	9.42931	8.88004	8.28727	7.69685	7.11841	6.5177	5.89585	5.27799	4.68646	4.11669	3.5755	3.09324	2.69014	2.3765	2.16592	2.07459	2.11621	2.3107	2.6869	3.23011	3.91455	4.76254	5.81002
2.5057	4.51721	6.91787	9.60766	12.3849	15.0769	17.5616	19.7534	21.5694	22.9476	23.8805	24.401	24.5517	24.4041	24.0328	23.4944	22.8283	22.0633	21.2181	20.3068	19.3543	18.4059	17.5031	16.6569	15.8619	15.099	14.3551	13.6279	12.8785	12.1034	11.331	10.565	9.82288	9.11388	8.43547	7.78654	7.16453	6.56677	5.99044	5.44564	4.92984	4.44878	4.02996	3.69592	3.46974	3.38707	3.48807	3.79566	4.33214	5.12848
4.92537	6.43109	8.25797	10.3292	12.48	14.598	16.6046	18.3742	19.8593	21.0199	21.8398	22.3284	22.5151	22.4128	22.0783	21.606	21.0007	20.3048	19.5561	18.7891	18.0317	17.305	16.624	15.9985	15.4324	14.925	14.4733	14.0727	13.716	13.3964	13.1079	12.8718	12.6369	12.4046	12.1818	11.9646	11.75	11.5376	11.3294	11.131	10.9504	10.7992	10.6919	10.6462	10.6811	10.8176	11.0753	11.475	12.0366	12.7777
-20.4717	-19.1056	-17.3769	-15.1506	-12.4672	-9.83479	-7.61829	-5.96646	-4.86192	-4.23984	-3.92458	-3.73282	-3.63594	-3.67166	-3.86718	-4.2047	-4.65259	-5.17727	-5.74615	-6.36009	-7.01783	-7.61324	-8.24858	-8.88021	-9.49694	-10.0951	-10.6853	-11.2663	-11.8312	-12.356	-12.8316	-13.2827	-13.6882	-14.1218	-14.5252	-14.8977	-15.2517	-15.5688	-15.8185	-15.9609	-16.0003	-15.9597	-15.739	-15.3779	-14.873	-14.2054	-13.3893	-12.4238	-11.328	-10.0991
1.03665	1.83856	2.8554	4.03478	5.33211	6.70462	8.11318	9.54534	10.9644	12.3117	13.516	14.5197	15.3344	16.3929	16.8911	17.0699	17.0818	16.9364	16.6462	16.2189	15.672	15.0257	14.3007	13.5161	12.6854	11.8251	10.9508	10.0744	9.21029	8.37207	7.57217	6.77063	6.03345	5.47481	4.93244	4.47244	4.09852	3.82307	3.69555	3.74901	3.8527	3.98837	4.25117	4.74894	5.39891	6.20764	7.17888	8.53042	9.81242	11.1643
9.32144	10.3604	11.7165	13.332	15.1427	17.0812	19.0627	20.9958	22.7954	24.3971	25.7467	26.792	27.5071	27.8812	27.9215	27.6556	27.1115	26.3313	25.3555	24.2325	23.0092	21.7339	20.4454	19.176	17.9539	16.8011	15.7316	14.7544	13.8694	13.0742	12.3631	11.7275	11.1565	10.6424	10.1738	9.745	9.35214	8.99584	8.67964	8.41122	8.20158	8.06786	8.02681	8.09539	8.2954	8.64753	9.17605	9.90042	10.8261	11.9796
-0.440363	0.39843	1.54444	2.92777	4.47206	6.09832	7.72922	9.29349	10.73	11.9908	13.0427	13.8681	14.4637	14.838	15.0091	15.0011	14.8412	14.5574	14.1762	13.7211	13.2123	12.6668	12.0979	11.5157	10.9279	10.3405	9.758	9.18455	8.624	8.08043	7.55831	7.06255	6.59853	6.17175	5.78801	5.45331	5.17377	4.95577	4.80585	4.73106	4.73892	4.83816	5.03709	5.34556	5.77429	6.3356	7.04129	7.90429	8.9366	10.1492
6.80508	8.32917	10.1705	12.2449	14.4374	16.6164	18.6584	20.4578	21.9791	23.2279	24.2257	24.9841	25.5027	25.7861	25.8531	25.7146	25.387	24.8926	24.2594	23.5158	22.6843	21.7783	20.8117	19.8006	18.7624	17.7142	16.6695	15.6378	14.6248	13.6343	12.669	11.7358	10.8382	9.98001	9.16386	8.39882	7.68855	7.0405	6.46635	5.98067	5.60168	5.35179	5.24969	5.31468	5.5628	6.00273	6.64375	7.49063	8.53891	9.80128
-1.01315	-0.272528	1.21811	3.36582	5.91917	8.79267	11.7461	14.4795	16.6827	18.1472	19.0906	19.7505	20.3547	20.9701	21.5256	21.8974	21.9339	21.5366	20.7948	19.7788	18.5633	17.2596	16.0032	14.8317	13.7292	12.6532	11.5566	10.4386	9.31389	8.19519	7.10722	6.07288	5.09735	4.1722	3.29837	2.50174	1.78089	1.11825	0.497662	-0.0803296	-0.632539	-1.16483	-1.67042	-2.10061	-2.40051	-2.4988	-2.35529	-1.96162	-1.3322	-0.503045
9.68648	10.872	12.2785	13.8242	15.4299	17.0229	18.5411	19.9351	21.1679	22.2161	23.0635	23.7047	24.1423	24.3838	24.4411	24.3321	24.0767	23.6976	23.2179	22.6598	22.044	21.3875	20.7035	20.0016	19.2876	18.564	17.8312	17.0914	16.338	15.5725	14.7975	14.0176	13.2405	12.4776	11.7427	11.0519	10.423	9.87329	9.41802	9.07096	8.84369	8.74639	8.78473	8.9644	9.29043	9.7695	10.4078	11.2153	12.2019	13.3778
6.14816	6.90022	8.00033	9.43816	11.1719	13.0175	14.838	16.4956	17.9574	19.2001	20.1947	20.9198	21.3849	21.5983	21.6367	21.4967	21.2216	20.8318	20.3075	19.6675	18.9284	18.1365	17.3307	16.512	15.6746	14.8171	13.9887	13.1715	12.3625	11.557	10.7729	10.0141	9.27605	8.56009	7.8686	7.22011	6.62409	6.07556	5.57845	5.16508	4.86717	4.71456	4.72968	4.94416	5.37441	6.00262	6.84697	7.90059	9.12735	10.5216
3.81519	4.66963	5.81383	7.18518	8.67784	10.1521	11.4878	12.632	13.6034	14.4581	15.2203	15.8566	16.3182	16.5765	16.637	16.533	16.3058	15.9873	15.5895	15.1033	14.5245	13.8658	13.1526	12.418	11.6872	10.9737	10.2805	9.60864	8.95521	8.31956	7.70333	7.10936	6.53829	5.9887	5.45444	4.93024	4.41709	3.9229	3.46582	3.07291	2.76748	2.56719	2.48004	2.51326	2.67329	2.96445	3.38698	3.93975	4.62767	5.45639
3.67426	4.76448	6.06292	7.47765	8.92807	10.3458	11.6737	12.8648	13.8818	14.6983	15.299	15.6803	15.8472	15.8114	15.5915	15.2094	14.6897	14.0604	13.3503	12.5869	11.7964	11.0008	10.2167	9.45658	8.7281	8.03626	7.38437	6.77519	6.21103	5.69368	5.2233	4.79841	4.41601	4.0718	3.76181	3.48314	3.23474	3.01798	2.83594	2.69401	2.59939	2.56144	2.59118	2.70179	2.90835	3.22852	3.67922	4.27837	5.04172	5.98236
8.27062	9.32101	10.7613	12.4809	14.3582	16.2727	18.1188	19.8125	21.2935	22.5225	23.4783	24.1541	24.5542	24.6917	24.5863	24.2667	23.7641	23.1129	22.3445	21.4843	20.5559	19.5777	18.5663	17.5375	16.5079	15.4942	14.5116	13.572	12.6832	11.8492	11.0707	10.3475	9.68006	9.06907	8.51626	8.02257	7.58736	7.20936	6.88538	6.61335	6.39288	6.2259	6.11717	6.07574	6.11528	6.25516	6.51744	6.92917	7.51535	8.30212
9.56318	10.8296	12.4185	14.2481	16.1916	18.1224	19.9405	21.5713	22.9613	24.0752	24.8968	25.431	25.7032	25.7486	25.5995	25.2823	24.8191	24.229	23.5258	22.7212	21.8297	20.8689	19.8561	18.8051	17.7261	16.6261	15.5116	14.3883	13.2604	12.1334	11.0158	9.91678	8.84646	7.81506	6.83312	5.91094	5.05898	4.28875	3.61301	3.04471	2.59456	2.27	2.07636	2.02151	2.1164	2.37548	2.81338	3.44632	4.29005	5.36043
3.40108	5.11223	7.33881	9.94521	12.7732	15.6571	18.4428	21.0034	23.246	25.1124	26.5752	27.6318	28.2923	28.5778	28.5204	28.1599	27.5411	26.7137	25.7261	24.6214	23.4364	22.1992	20.9297	19.6418	18.3449	17.0446	15.7446	14.4474	13.1555	11.8723	10.6028	9.3538	8.13365	6.9523	5.82151	4.75576	3.77383	2.89659	2.14559	1.54125	1.10013	0.833567	0.744521	0.831864	1.09099	1.5155	2.09783	2.83359	3.71994	4.75695
10.2837	11.076	12.1495	13.4459	14.9039	16.4591	18.043	19.5807	20.9977	22.234	23.2571	24.0565	24.632	24.9816	25.1015	24.9941	24.664	24.1241	23.4016	22.5281	21.5362	20.4677	19.355	18.2237	17.0923	15.9736	14.8744	13.8002	12.7541	11.7401	10.7633	9.82927	8.94307	8.11369	7.34409	6.64094	6.01015	5.45643	4.98845	4.61731	4.35295	4.20851	4.19709	4.33218	4.62924	5.10345	5.76797	6.62898	7.69897	8.98853
4.8603	6.01987	7.47267	9.14125	10.9527	12.841	14.7451	16.6043	18.3578	19.9503	21.3377	22.4876	23.3809	24.0102	24.3796	24.5014	24.3943	24.082	23.5915	22.9511	22.1916	21.343	20.4341	19.4906	18.5341	17.5797	16.6366	15.7088	14.7965	13.8978	13.0103	12.1317	11.261	10.3988	9.54717	8.70981	7.89223	7.10144	6.34534	5.63305	4.97489	4.38264	3.86917	3.45093	3.14354	2.96703	2.94123	3.08747	3.42734	3.9787
0.116104	1.05736	2.43771	4.15872	6.11057	8.18633	10.2737	12.2779	14.1244	15.7425	17.0821	18.1129	18.8303	19.2282	19.3421	19.2036	18.8428	18.2923	17.5806	16.7271	15.7588	14.7118	13.6209	12.5159	11.4248	10.3743	9.37909	8.44909	7.59354	6.81988	6.12912	5.52242	4.99623	4.54877	4.17727	3.87867	3.64842	3.48235	3.37688	3.32969	3.34342	3.42186	3.57452	3.81295	4.15152	4.60711	5.19884	5.94762	6.87073	7.997
2.25877	3.3661	4.76177	6.37559	8.13436	9.94791	11.7153	13.3636	14.8383	16.0933	17.0915	17.8221	18.2984	18.5387	18.5531	18.3639	17.9917	17.4563	16.781	15.9863	15.0945	14.1293	13.1125	12.0634	11.0017	9.94257	8.89829	7.8774	6.88647	5.93203	5.02106	4.15586	3.34512	2.59248	1.90107	1.27843	0.729205	0.258349	-0.130171	-0.430236	-0.626932	-0.710701	-0.670592	-0.493847	-0.157399	0.361246	1.0733	2.00384	3.15848	4.56119
-6.83037	-5.64999	-4.2435	-2.68466	-1.05388	0.570156	2.11483	3.51493	4.72145	5.71458	6.49992	7.08299	7.45729	7.6194	7.58185	7.36505	6.99254	6.49156	5.89001	5.21281	4.48212	3.71835	2.94068	2.1675	1.41913	0.69564	0.00944585	-0.634874	-1.23548	-1.79315	-2.3104	-2.79005	-3.23365	-3.6421	-4.01589	-4.35024	-4.65157	-4.92052	-5.14193	-5.3082	-5.41207	-5.44833	-5.40732	-5.27565	-5.03818	-4.67917	-4.18381	-3.53627	-2.72185	-1.72679
15.6565	17.5985	19.834	22.2179	24.6169	26.9226	29.0518	30.943	32.5515	33.847	34.813	35.4475	35.7623	35.7808	35.5349	35.0597	34.3887	33.554	32.5841	31.5029	30.3352	29.1027	27.8259	26.5239	25.2133	23.9079	22.6184	21.3526	20.1154	18.9094	17.7349	16.5919	15.4798	14.3982	13.3478	12.3308	11.3522	10.4188	9.53834	8.72036	7.97637	7.32092	6.77057	6.34608	6.07165	5.97622	6.0894	6.44474	7.07271	8.00177
0.940025	2.25732	3.8445	5.61236	7.47312	9.34513	11.1564	12.8473	14.3717	15.6969	16.8025	17.6812	18.3353	18.7739	19.013	19.0729	18.9755	18.7446	18.4041	17.9766	17.484	16.9464	16.3804	15.8008	15.2189	14.6436	14.0809	13.5346	13.0066	12.4971	12.0051	11.5285	11.0649	10.6118	10.167	9.72942	9.29957	8.87974	8.47479	8.09249	7.74329	7.44144	7.20346	7.04956	7.00309	7.09016	7.33663	7.77024	8.41897	9.30559
-0.173312	1.40386	3.2429	5.23472	7.27071	9.2509	11.0906	12.7244	14.1068	15.2115	16.0286	16.5645	16.8373	16.8734	16.7045	16.3665	15.8948	15.3228	14.6801	13.9913	13.2759	12.5485	11.8188	11.0931	10.3746	9.66481	8.96372	8.27096	7.58618	6.90952	6.24207	5.58623	4.94605	4.32733	3.73776	3.18682	2.68564	2.24675	1.88361	1.61071	1.44259	1.39481	1.48175	1.7184	2.11985	2.7016	3.47762	4.46237	5.66909	7.10983
2.59096	3.98305	5.76349	7.82137	10.0384	12.2959	14.4818	16.4937	18.2444	19.6752	20.7526	21.4623	21.8091	21.8157	21.5178	20.9637	20.205	19.2924	18.273	17.1883	16.0738	14.9582	13.8638	12.8068	11.7963	10.8386	9.93621	9.09003	8.29852	7.55874	6.86768	6.22196	5.61912	5.05874	4.53949	4.06385	3.63812	3.26964	2.96984	2.75148	2.62902	2.61751	2.73292	2.9921	3.41147	4.00993	4.80159	5.79844	7.0142	8.45771
-2.51825	-1.72544	-0.559577	0.906572	2.5907	4.40481	6.25919	8.06687	9.75125	11.2557	12.5478	13.6164	14.4644	15.102	15.5425	15.8021	15.8982	15.852	15.6863	15.4241	15.0883	14.6993	14.2751	13.8318	13.384	12.9444	12.5244	12.1333	11.7777	11.4617	11.1863	10.9502	10.7506	10.5837	10.446	10.3353	10.2505	10.1929	10.166	10.1759	10.231	10.343	10.5246	10.7903	11.1552	11.6348	12.2416	12.9868	13.8768	14.915
6.15458	8.08714	10.386	12.9531	15.6744	18.4136	21.0021	23.309	25.2641	26.816	27.9417	28.6356	28.9233	28.8526	28.4734	27.8394	27.0105	26.0465	25.0071	23.9311	22.8464	21.7708	20.7114	19.67	18.6484	17.651	16.6842	15.7609	14.9008	14.1268	13.4603	12.9187	12.5173	12.2675	12.161	12.1936	12.3452	12.6005	12.9381	13.3387	13.7873	14.2785	14.8117	15.3913	16.0324	16.7517	17.571	18.518	19.6091	20.8778
5.01036	6.02062	7.2454	8.60937	10.0388	11.4661	12.8336	14.0955	15.2184	16.18	16.9661	17.5688	17.9843	18.2122	18.2556	18.1211	17.8189	17.3623	16.7677	16.0535	15.2391	14.3443	13.3876	12.3861	11.3544	10.3049	9.24775	8.1914	7.14327	6.11051	5.1005	4.12126	3.18187	2.29251	1.46448	0.710008	0.0420094	-0.526196	-0.981206	-1.30986	-1.49933	-1.53713	-1.41274	-1.11604	-0.637863	0.0305997	0.896505	1.96669	3.24772	4.74564
1.95384	2.64496	3.55208	4.62054	5.79509	7.02283	8.2559	9.45309	10.5792	11.6055	12.5086	13.2699	13.8759	14.318	14.5937	14.7041	14.6566	14.4621	14.1367	13.6969	13.1587	12.5403	11.8569	11.1247	10.3582	9.5709	8.77589	7.98494	7.20914	6.45895	5.74337	5.06981	4.44515	3.87494	3.36352	2.91597	2.53748	2.23182	2.0046	1.86249	1.81113	1.85864	2.01276	2.28239	2.67534	3.20176	3.87056	4.69215	5.68071	6.84744
2.4376	2.85899	3.57878	4.53641	5.66494	6.8949	8.15893	9.39041	10.5316	11.5417	12.3929	13.0704	13.5685	13.8922	14.0554	14.0766	13.9756	13.7692	13.475	13.1101	12.687	12.2154	11.7011	11.1492	10.5634	9.94665	9.30245	8.6345	7.9484	7.25084	6.55002	5.85515	5.17647	4.52588	3.91411	3.35377	2.85575	2.42985	2.08535	1.8312	1.67335	1.61727	1.66527	1.81943	2.08122	2.45057	2.93084	3.52355	4.23381	5.07349
5.74082	6.69916	7.90718	9.30157	10.8207	12.4024	13.9737	15.4697	16.8268	17.9917	18.932	19.6447	20.1305	20.3996	20.4653	20.3419	20.0454	19.5918	19.0072	18.3177	17.5477	16.7224	15.8615	14.9858	14.111	13.2526	12.4223	11.6312	10.8875	10.1922	9.54459	8.94415	8.38792	7.87573	7.40616	6.98332	6.60839	6.28485	6.02232	5.82973	5.71691	5.69902	5.79348	6.02063	6.40302	6.95426	7.69378	8.63745	9.79176	11.1747
1.60457	2.74692	4.16097	5.88229	7.8706	9.96442	11.9856	13.8399	15.4994	16.959	18.1968	19.1729	19.8991	20.3901	20.6285	20.6295	20.417	20.034	19.5189	18.8851	18.1679	17.3807	16.5409	15.6635	14.7586	13.8323	12.892	11.9558	11.0155	10.0814	9.16786	8.28419	7.43974	6.64273	5.89889	5.21366	4.61167	4.08686	3.64885	3.32271	3.11433	3.04406	3.12255	3.36111	3.76752	4.35549	5.13034	6.1099	7.30314	8.72969
1.26787	1.28283	1.49847	1.90317	2.47336	3.14843	3.85054	4.51305	5.09341	5.56826	5.92803	6.17185	6.2971	6.30956	6.22702	6.07376	5.87104	5.63439	5.37431	5.09099	4.78207	4.44895	4.09797	3.73708	3.37342	3.01414	2.66618	2.33568	2.02654	1.73836	1.46851	1.21341	0.97002	0.737808	0.51903	0.316958	0.139393	-0.00332258	-0.0978675	-0.130235	-0.0889443	0.0344884	0.252384	0.579678	1.03133	1.62411	2.37766	3.30862	4.43375	5.76325
2.81303	4.35441	6.20146	8.24967	10.3849	12.4988	14.4984	16.308	17.8667	19.1276	20.0554	20.6486	20.9509	21.0264	20.9384	20.735	20.4311	20.0168	19.4697	18.7684	17.8991	16.8737	15.7108	14.4419	13.0986	11.7129	10.3133	8.92319	7.56051	6.23719	4.96152	3.74037	2.58279	1.4986	0.497433	-0.409794	-1.21119	-1.89693	-2.4564	-2.87629	-3.14887	-3.26102	-3.20266	-2.9556	-2.50952	-1.84986	-0.962437	0.168044	1.55471	3.19893
-0.578791	0.493303	2.00835	3.88449	6.02618	8.32461	10.6591	12.8807	14.8966	16.6276	18.0182	19.0312	19.6614	19.9181	19.8276	19.4173	18.7226	17.7904	16.6766	15.444	14.1464	12.8369	11.5622	10.3578	9.25074	8.26334	7.39906	6.65907	6.03822	5.52818	5.11866	4.79399	4.53915	4.34256	4.19053	4.07656	3.99277	3.93782	3.91352	3.92616	3.98752	4.11263	4.3165	4.61741	5.03539	5.59282	6.3114	7.21722	8.32014	9.64828
5.27253	6.81697	8.58691	10.4828	12.4099	14.2831	16.0311	17.5981	18.9447	20.0468	20.894	21.4864	21.8322	21.9452	21.8418	21.5424	21.068	20.4423	19.6897	18.834	17.9007	16.9135	15.8939	14.8615	13.8331	12.8223	11.8396	10.8924	9.98576	9.12182	8.30124	7.52367	6.78851	6.09488	5.443	4.83469	4.27394	3.76751	3.32395	2.95471	2.67403	2.49898	2.44732	2.53898	2.79369	3.2331	3.87512	4.73791	5.83333	7.17061
5.15892	6.11491	7.29481	8.63369	10.0685	11.541	12.9976	14.3836	15.6471	16.7627	17.712	18.4842	19.0732	19.4796	19.71	19.7774	19.6975	19.485	19.1562	18.7284	18.2195	17.6486	17.0317	16.3833	15.7155	15.0385	14.3607	13.6878	13.0237	12.3711	11.7312	11.1052	10.4941	9.9006	9.32837	8.78539	8.28052	7.82549	7.43628	7.13065	6.92888	6.85434	6.93163	7.18356	7.63241	8.30075	9.20764	10.3616	11.7737	13.4647
0.739856	1.27872	2.1755	3.39441	4.91164	6.61795	8.40824	10.1998	11.895	13.4301	14.7495	15.7954	16.5482	17.0135	17.1959	17.1145	16.8118	16.3244	15.6953	14.9668	14.1709	13.3416	12.5086	11.6908	10.9069	10.1677	9.47936	8.84622	8.2629	7.72946	7.23845	6.78184	6.35551	5.95478	5.57252	5.20714	4.86365	4.54004	4.24423	3.99151	3.79026	3.66259	3.63303	3.72512	3.96121	4.37294	4.99113	5.83111	6.91527	8.24402
[truncated: 50 more columns]

## Sheet: 2
7.4869	9.59198	11.7248	13.7862	15.6282	17.1799	18.347	19.1453	19.6214	19.8437	19.8819	19.7696	19.5364	19.2023	18.7858	18.3038	17.7712	17.2075	16.6086	15.997	15.3878	14.7846	14.1954	13.6126	13.0518	12.5153	12.0099	11.5427	11.1114	10.714	10.3505	10.0212	9.72341	9.45847	9.22996	9.04447	8.90968	8.8389	8.84556	8.9423	9.13975	9.445	9.87007	10.4157	11.088	11.8877	12.8492	13.9775	15.3117	16.8761
5.2708	7.22371	9.83261	12.7653	15.9571	19.2727	22.4875	25.5448	28.2598	30.5759	32.443	33.8398	34.7701	35.2574	35.3394	35.0604	34.4713	33.623	32.5755	31.3402	29.9857	28.5467	27.0063	25.4266	23.8237	22.2217	20.6458	19.1182	17.6571	16.2758	14.9795	13.7672	12.6362	11.5899	10.5766	9.64074	8.76073	7.93358	7.16231	6.43851	5.7693	5.17143	4.64962	4.22189	3.91235	3.75769	3.79446	4.06207	4.59679	5.41916
12.9228	15.2663	17.5853	19.7864	21.7932	23.5393	24.9691	26.0536	26.7949	27.2242	27.3623	27.2284	26.87	26.3322	25.6607	24.8951	24.0666	23.1988	22.309	21.4099	20.5103	19.618	18.7387	17.881	17.0517	16.2533	15.4904	14.7611	14.0341	13.332	12.6471	11.9739	11.3093	10.6511	10.0264	9.44359	8.94782	8.56606	8.33652	8.29641	8.4654	8.86717	9.51703	10.4283	11.6157	13.0799	14.8209	16.844	19.1457	21.7064
6.68966	7.59305	8.54508	9.6074	10.7619	11.9472	13.0755	14.037	14.7579	15.2026	15.3962	15.3927	15.254	15.0291	14.7433	14.3961	13.9828	13.4976	12.9289	12.2902	11.6041	10.8828	10.1451	9.39817	8.66225	7.94749	7.27246	6.63176	6.04652	5.51314	5.03156	4.60239	4.22333	3.8973	3.63134	3.43616	3.32539	3.31477	3.41968	3.65471	4.02893	4.55829	5.23484	6.05242	7.02357	8.13741	9.41078	10.8523	12.4907	14.3537
21.4578	23.6934	26.0242	28.339	30.5394	32.4772	34.1142	35.4454	36.4254	37.0318	37.2873	37.2326	36.8919	36.295	35.4819	34.5	33.3993	32.1801	30.8931	29.5793	28.2564	26.9442	25.6629	24.4282	23.2545	22.1532	21.1344	20.2	19.349	18.5724	17.8669	17.2264	16.6462	16.127	15.6716	15.2837	14.9702	14.7388	14.6031	14.5885	14.71	14.9866	15.4702	16.1714	17.1073	18.3001	19.7729	21.5	23.5117	25.8074
11.2866	12.6236	14.455	16.7447	19.1106	21.4643	24.0028	26.1337	27.7728	29.1299	30.0994	30.6082	30.7044	30.5753	30.1545	29.4842	28.6946	27.7474	26.7203	25.6814	24.6291	23.607	22.6333	21.653	20.7448	19.855	18.99	18.1755	17.4216	16.7203	16.0685	15.4734	14.9094	14.4028	13.93	13.4759	13.0621	12.6863	12.2958	11.9376	11.6357	11.321	11.0182	10.786	10.596	10.4857	10.4886	10.6022	10.8575	11.3262
11.3109	13.707	16.0175	18.1686	20.096	21.7169	22.9583	23.8456	24.3929	24.5942	24.4543	24.0037	23.2735	22.3056	21.1563	19.8514	18.4229	16.9156	15.3425	13.7305	12.138	10.5914	9.12766	7.78122	6.57937	5.53275	4.67864	4.01288	3.52544	3.20386	3.03052	2.9782	3.0205	3.13365	3.30578	3.52618	3.79892	4.13391	4.5465	5.08087	5.76262	6.61702	7.6814	8.96369	10.5255	12.3909	14.5286	16.9574	19.7075	22.7436
10.9669	12.743	14.6793	16.6548	18.538	20.2168	21.6169	22.7009	23.4576	23.9116	24.053	23.9264	23.5786	23.0666	22.4349	21.7182	20.9427	20.1254	19.2755	18.3961	17.4882	16.5533	15.5981	14.6334	13.6731	12.73	11.8152	10.937	10.1017	9.3103	8.56473	7.86895	7.22774	6.65015	6.14863	5.72988	5.40473	5.19441	5.11159	5.17863	5.42257	5.85897	6.49412	7.33005	8.36549	9.60856	11.0584	12.7695	14.7424	16.9991
9.39409	11.6627	13.9487	16.1547	18.1537	19.8297	21.1395	22.0712	22.631	22.8448	22.751	22.3976	21.8352	21.1121	20.2701	19.3619	18.3596	17.3298	16.2572	15.1652	14.0593	12.9397	11.8101	10.6738	9.53494	8.39756	7.26624	6.14874	5.05043	3.9578	2.90818	1.90446	0.96293	0.104552	-0.641773	-1.2455	-1.68427	-1.95044	-2.0023	-1.85016	-1.49917	-0.959638	-0.247653	0.657436	1.73875	3.01991	4.52318	6.26268	8.29995	10.6375
11.8744	14.0221	16.1872	18.2679	20.1622	21.7834	23.0714	23.9943	24.5432	24.7357	24.6044	24.1885	23.5496	22.7547	21.8399	20.8775	19.8904	18.8956	17.8887	16.8568	15.7998	14.7079	13.5893	12.4391	11.2822	10.137	9.01503	7.92657	6.88043	5.88494	4.92522	4.0244	3.18085	2.40152	1.69804	1.08652	0.588159	0.228374	0.0375646	0.047062	0.283603	0.762458	1.48444	2.44193	3.6193	4.99719	6.55897	8.29589	10.2103	12.3175
8.78357	10.801	12.8034	14.7479	16.4629	17.9512	19.1239	19.9807	20.53	20.7974	20.8197	20.6418	20.3081	19.8629	19.3499	18.8097	18.2767	17.7757	17.3196	16.9124	16.5411	16.1917	15.8631	15.5442	15.2316	14.9243	14.6231	14.3301	14.0473	13.7744	13.5099	13.2517	12.9996	12.7552	12.5245	12.3175	12.1489	12.0373	12.0022	12.0722	12.2603	12.5885	13.0741	13.7346	14.5859	15.6442	16.9279	18.4487	20.2126	22.2749
19.0792	20.9992	22.8835	24.6983	26.3044	27.6315	28.7179	29.5035	29.9106	30.0445	29.9117	29.4761	28.7949	27.9156	26.8428	25.608	24.2615	22.8297	21.347	19.8424	18.3405	16.86	15.418	14.034	12.722	11.504	10.3991	9.41426	8.56331	7.86067	7.3024	6.88815	6.62421	6.50756	6.52816	6.69251	7.0034	7.45886	8.06384	8.83107	9.77524	10.8999	12.2352	13.7924	15.5896	17.6449	19.9565	22.5581	25.4076	28.5031
12.8399	16.8456	20.9391	24.887	28.4955	31.6085	34.0987	35.9285	37.1039	37.6664	37.6726	37.1744	36.2493	34.9623	33.4108	31.6584	29.7712	27.8099	25.8254	23.8592	21.9483	20.1243	18.4094	16.8222	15.373	14.0758	12.9423	11.9302	11.0707	10.3343	9.69616	9.12912	8.6037	8.09442	7.58535	7.07377	6.54563	6.04547	5.56522	5.16372	4.87957	4.75119	4.81568	5.11294	5.67879	6.54758	7.73733	9.26451	11.1435	13.3586
13.6925	16.3442	18.8807	21.226	23.2989	24.9611	26.2104	27.0893	27.6019	27.7575	27.6079	27.2014	26.5662	25.7476	24.7836	23.7031	22.5486	21.3616	20.1538	18.9656	17.816	16.7105	15.649	14.6281	13.641	12.6808	11.7465	10.8374	9.96056	9.12148	8.32811	7.58586	6.89928	6.27283	5.71712	5.23112	4.82501	4.51162	4.30674	4.23972	4.33878	4.63443	5.17946	6.01323	7.17587	8.70325	10.6219	12.9165	15.5926	18.604
20.5962	23.1998	25.764	28.186	30.3663	32.225	33.7069	34.7819	35.4382	35.6854	35.549	35.0723	34.311	33.3355	32.2021	30.9572	29.6728	28.3689	27.0625	25.763	24.4761	23.2085	21.969	20.7701	19.626	18.5513	17.561	16.6645	15.8688	15.1737	14.5751	14.0669	13.6402	13.283	12.9953	12.7707	12.6126	12.5293	12.5344	12.6449	12.8805	13.2628	13.809	14.5576	15.5285	16.7514	18.255	20.0544	22.1498	24.5329
15.2982	17.0646	18.7482	20.2872	21.6271	22.7305	23.5803	24.1759	24.529	24.6591	24.5948	24.3621	23.9933	23.5217	22.9704	22.3646	21.7245	21.0604	20.3781	19.6777	18.956	18.2094	17.4366	16.6408	15.8362	15.0164	14.2009	13.3951	12.6015	11.8253	11.0774	10.3624	9.68726	9.08285	8.56288	8.14375	7.8426	7.67537	7.65687	7.79648	8.10228	8.57928	9.22818	10.0506	11.0511	12.2393	13.6283	15.2334	17.0688	19.1444
7.45272	9.37972	11.2987	13.1705	14.8691	16.3361	17.5327	18.4411	19.0624	19.4114	19.5121	19.3955	19.0964	18.6539	18.1072	17.4931	16.8435	16.1785	15.506	14.8131	14.1017	13.3611	12.5898	11.7933	10.9827	10.1711	9.37279	8.59816	7.84468	7.12762	6.45689	5.83563	5.27108	4.76967	4.33804	3.97975	3.70003	3.50564	3.40537	3.41027	3.53837	3.80688	4.23336	4.83777	5.6397	6.66397	7.93651	9.48422	11.3309	13.4904
16.544	18.2107	19.956	21.7046	23.3687	24.8545	26.0687	26.9451	27.4473	27.552	27.2896	26.7141	25.9109	24.9572	23.9486	22.9594	22.032	21.1615	20.3412	19.5473	18.753	17.9417	17.1072	16.2504	15.3765	14.5034	13.6242	12.7571	11.9281	11.1575	10.4697	9.87467	9.38633	8.99987	8.70494	8.48464	8.32121	8.20338	8.12304	8.07991	8.07242	8.10472	8.18718	8.33573	8.57115	8.91996	9.41343	10.081	10.9836	12.1481
5.28839	7.8714	10.4695	12.94	15.1676	17.0694	18.5934	19.7193	20.4558	20.8327	20.8888	20.6651	20.2042	19.5519	18.756	17.8608	16.903	15.8994	14.8724	13.8199	12.7364	11.6162	10.4582	9.27463	8.04868	6.82358	5.6094	4.42691	3.28837	2.19697	1.17843	0.215751	-0.689078	-1.50165	-2.20812	-2.77982	-3.18149	-3.37739	-3.33598	-3.03713	-2.46655	-1.61856	-0.497977	0.89065	2.54135	4.45211	6.6229	9.05525	11.7459	14.6833
15.8949	17.6006	19.2602	20.7874	22.1478	23.2835	24.1679	24.8093	25.2248	25.4289	25.4573	25.34	25.092	24.7291	24.2649	23.6996	23.0471	22.3205	21.533	20.6982	19.831	18.9455	18.0312	17.1182	16.2104	15.2973	14.4058	13.5428	12.6932	11.8792	11.1025	10.3585	9.66035	9.00752	8.41039	7.87872	7.43145	7.09807	6.89994	6.86393	7.01227	7.35483	7.89593	8.63268	9.56514	10.7004	12.0522	13.648	15.4993	17.601
18.5595	21.0021	23.3625	25.5518	27.4998	29.1581	30.4975	31.496	32.1565	32.5137	32.5995	32.4471	32.0905	31.5628	30.8928	30.123	29.2749	28.366	27.4052	26.3981	25.351	24.2695	23.1623	22.0433	20.9273	19.8272	18.754	17.7152	16.7143	15.752	14.8282	13.9416	13.0922	12.2813	11.5173	10.8045	10.1557	9.58343	9.10537	8.74575	8.51687	8.44847	8.57154	8.91207	9.49753	10.3424	11.4647	12.89	14.619	16.65
10.4015	13.1258	15.803	18.2483	20.3217	21.9515	23.0762	23.7187	23.9184	23.7325	23.232	22.497	21.6046	20.6223	19.5991	18.5648	17.5352	16.5194	15.5266	14.5688	13.6594	12.8101	12.0269	11.3093	10.65	10.0413	9.47546	8.94445	8.4453	7.97681	7.53887	7.13333	6.76331	6.4325	6.14553	5.90567	5.71806	5.59137	5.53745	5.57016	5.70603	5.96159	6.35109	6.89812	7.61246	8.5188	9.63783	10.9856	12.5719	14.4007
12.1881	14.9294	17.3449	19.3484	20.8886	21.9558	22.5745	22.791	22.6623	22.2573	21.6435	20.885	20.0395	19.1546	18.2608	17.3726	16.4862	15.5817	14.6355	13.6308	12.565	11.4512	10.3144	9.18619	8.1001	7.07696	6.12561	5.24648	4.44164	3.72131	3.09462	2.58294	2.19866	1.94311	1.82417	1.83407	1.97758	2.26234	2.69593	3.28768	4.04875	5.00094	6.17189	7.58815	9.26705	11.2294	13.4778	15.9837	18.8155	21.9142
12.5766	14.7525	16.9001	18.9373	20.8179	22.4835	23.8504	24.9009	25.6481	26.1122	26.311	26.2599	25.975	25.4781	24.7953	23.9632	23.009	21.965	20.8619	19.7265	18.5789	17.4345	16.304	15.2012	14.1262	13.0839	12.0975	11.1719	10.3175	9.54524	8.86595	8.29033	7.83309	7.50046	7.31563	7.27963	7.40589	7.68965	8.13097	8.72496	9.46534	10.3455	11.3658	12.5344	13.8678	15.3918	17.1188	19.072	21.2633	23.6756
16.2193	18.9399	21.7202	24.3548	26.708	28.7113	30.3143	31.424	32.0721	32.3053	32.1736	31.7183	30.97	29.9716	28.7702	27.4216	25.9467	24.4204	22.8762	21.3476	19.8641	18.4652	17.1229	15.8789	14.7432	13.7111	12.7868	11.9715	11.257	10.6368	10.1051	9.65748	9.28886	8.98165	8.72755	8.50595	8.32189	8.17387	8.07782	8.04804	8.11116	8.29221	8.61474	9.09698	9.77041	10.6844	11.827	13.2329	14.913	16.8632
9.62672	11.4781	13.4008	15.3578	17.1744	18.7638	20.0397	20.95	21.4859	21.68	21.5933	21.2961	20.8529	20.3151	19.7215	19.1023	18.4804	17.8713	17.2813	16.7075	16.1401	15.5658	14.9708	14.3454	13.6885	13.0085	12.3205	11.6441	11.0049	10.4175	9.89411	9.45394	9.09103	8.79817	8.56569	8.38438	8.25198	8.17446	8.16434	8.23819	8.41443	8.70958	9.13643	9.70281	10.4078	11.2639	12.2718	13.4432	14.805	16.3881
23.3445	25.5488	27.5966	29.4379	31.0371	32.3696	33.4161	34.1551	34.5794	34.7176	34.6047	34.2712	33.7437	33.0511	32.2121	31.2405	30.1686	29.01	27.7841	26.5101	25.2084	23.8973	22.5927	21.3045	20.04	18.8067	17.6154	16.4767	15.4021	14.4028	13.4848	12.6529	11.9124	11.2621	10.7165	10.2675	9.94239	9.76129	9.74932	9.93101	10.3191	10.9238	11.7505	12.8024	14.0824	15.5846	17.3065	19.2544	21.4172	23.7896
13.4194	16.6859	19.8888	22.8866	25.5684	27.8528	29.6937	31.0915	32.0115	32.48	32.5251	32.1922	31.5292	30.5867	29.412	28.0553	26.5341	24.8983	23.1798	21.4025	19.5906	17.7823	15.9705	14.2024	12.5067	10.8873	9.3899	8.0149	6.77273	5.66612	4.69362	3.84907	3.11854	2.48547	1.93288	1.43652	0.97799	0.544857	0.133345	-0.24809	-0.576143	-0.816409	-0.925755	-0.863393	-0.583693	-0.0240909	0.864108	2.12113	3.77843	5.86459
17.4957	19.4137	21.2419	22.9098	24.362	25.5685	26.5215	27.2298	27.7104	27.9897	28.0783	27.9907	27.7463	27.3687	26.8862	26.3296	25.7259	25.0932	24.4377	23.7553	23.0375	22.2774	21.4742	20.635	19.7733	18.9048	18.0432	17.1954	16.3625	15.544	14.7425	13.9642	13.2188	12.5187	11.8803	11.3234	10.8716	10.5492	10.3771	10.3703	10.5356	10.8712	11.3728	12.0276	12.8359	13.8078	14.9669	16.3481	17.99	19.9263
11.7235	13.4382	15.1072	16.6555	18.0622	19.2796	20.3012	21.1197	21.7344	22.1487	22.3722	22.4212	22.307	22.0475	21.6635	21.1737	20.595	19.9425	19.23	18.4708	17.6785	16.867	16.0472	15.2308	14.4083	13.5941	12.7822	11.9723	11.1706	10.3677	9.58009	8.81238	8.07515	7.3813	6.74983	6.19113	5.7363	5.41366	5.25168	5.27415	5.50094	5.95058	6.6088	7.4961	8.61039	9.95191	11.5331	13.3825	15.4575	17.751
14.1687	15.9702	17.6778	19.2425	20.6375	21.8402	22.8285	23.5807	24.0774	24.3231	24.3384	24.1578	23.8223	23.3682	22.8231	22.2123	21.5444	20.8299	20.0746	19.2861	18.4756	17.6521	16.8211	15.9825	15.1331	14.2713	13.3994	12.5263	11.6684	10.843	10.0658	9.33185	8.6533	8.02831	7.45594	6.935	6.47213	6.07781	5.76582	5.55857	5.4788	5.54871	5.78398	6.19449	6.78129	7.53985	8.46928	9.57142	10.8491	12.3156
8.36203	10.0744	11.8568	13.576	15.0791	16.291	17.1619	17.704	17.9631	17.9689	17.7553	17.3654	16.8474	16.25	15.6119	14.9568	14.2938	13.6227	12.9382	12.2312	11.4992	10.7617	10.0344	9.34001	8.69642	8.10963	7.5777	7.09189	6.63336	6.18667	5.74345	5.30412	4.86257	4.43734	4.03602	3.67167	3.36123	3.1252	2.97943	2.94936	3.05218	3.30081	3.69825	4.23778	4.91469	5.711	6.61951	7.6373	8.77446	10.0592
13.6827	15.8738	18.2094	20.4915	22.5843	24.3868	25.8413	26.9352	27.6899	28.143	28.3331	28.2934	28.0517	27.6376	27.0792	26.3983	25.6167	24.7504	23.8124	22.8162	21.7766	20.7119	19.643	18.5914	17.5759	16.6117	15.7121	14.8771	14.0872	13.3494	12.6595	12.0066	11.3889	10.8091	10.2745	9.7942	9.37965	9.0436	8.80207	8.66745	8.65338	8.77234	9.03284	9.44175	10.0012	10.7168	11.598	12.6673	13.9569	15.5028
11.2286	12.9337	14.8794	16.9612	19.0926	21.106	22.8458	24.2025	25.1575	25.6878	25.8392	25.676	25.2691	24.6714	23.9376	23.1075	22.2016	21.2315	20.2017	19.123	17.968	16.7627	15.5145	14.236	12.945	11.6591	10.3942	9.1613	7.96779	6.81863	5.7189	4.67453	3.69254	2.78147	1.95812	1.20944	0.566118	0.0336782	-0.37404	-0.638373	-0.737426	-0.649403	-0.361138	0.137153	0.849687	1.7759	2.91642	4.27336	5.84953	7.64938
10.9953	14.0731	17.1658	20.1195	22.6901	24.8031	26.4351	27.6123	28.3824	28.7934	28.8866	28.6987	28.2637	27.6104	26.763	25.742	24.5757	23.2993	21.9527	20.5762	19.2017	17.8491	16.5053	15.1635	13.8277	12.5048	11.1738	9.87558	8.60881	7.3785	6.18795	5.04066	3.9417	2.89834	1.92356	1.03358	0.249051	-0.408633	-0.917945	-1.26134	-1.42099	-1.38172	-1.13849	-0.68374	-0.0241433	0.829726	1.86807	3.08615	4.4864	6.08166
15.5974	17.8526	20.2574	22.6655	24.9451	26.9852	28.6996	30.015	30.886	31.3384	31.4032	31.117	30.5238	29.6489	28.5293	27.2533	25.8223	24.3019	22.7655	21.2398	19.7555	18.3324	16.9796	15.6945	14.4699	13.293	12.1635	11.0745	9.98314	8.95716	7.96973	7.04496	6.19585	5.43087	4.77066	4.22327	3.80949	3.54672	3.45493	3.55473	3.85663	4.37636	5.11712	6.07403	7.25169	8.64701	10.2538	12.1447	14.2462	16.6029
15.5198	18.3051	20.9576	23.3905	25.5237	27.2963	28.6782	29.6742	30.3171	30.6516	30.7208	30.5593	30.1941	29.6441	28.9244	28.0507	27.0424	25.9222	24.7147	23.4445	22.1343	20.8114	19.4808	18.1655	16.8898	15.6596	14.4808	13.3546	12.2806	11.2583	10.2875	9.368	8.49946	7.68427	6.92716	6.23358	5.61281	5.08062	4.65908	4.37275	4.24689	4.306	4.57176	5.06273	5.79114	6.76356	7.98402	9.456	11.184	13.1729
9.05302	10.8215	12.7538	14.7632	16.7592	18.5927	20.1681	21.4596	22.4292	23.0261	23.2561	23.168	22.7932	22.1574	21.309	20.3028	19.1898	18.0147	16.8184	15.6329	14.4782	13.3663	12.3046	11.2965	10.3455	9.45828	8.64303	7.90678	7.25772	6.70015	6.23939	5.87263	5.59187	5.39135	5.27508	5.23258	5.26648	5.3836	5.59907	5.92524	6.37988	6.98239	7.76132	8.73544	9.93047	11.3593	13.051	14.9969	17.214	19.684
18.0947	20.7095	23.1876	25.4315	27.3589	28.9372	30.1306	30.9084	31.3352	31.4513	31.2931	30.8848	30.2512	29.4231	28.4285	27.3003	26.0656	24.7357	23.3538	21.9316	20.4798	19.0078	17.5276	16.0537	14.6043	13.2004	11.8652	10.6216	9.47896	8.44203	7.5106	6.68021	5.95309	5.32356	4.80563	4.40627	4.15243	4.05932	4.14431	4.41608	4.88754	5.55523	6.42263	7.48691	8.75029	10.2283	11.9303	13.8828	16.1108	18.61
13.4843	15.4444	17.4072	19.2275	20.7868	22.0114	22.8762	23.3969	23.6145	23.5781	23.3341	22.92	22.3693	21.701	20.941	20.1225	19.2701	18.4097	17.5633	16.7483	15.9765	15.2582	14.5831	13.9594	13.3811	12.8494	12.3544	11.9092	11.5143	11.1723	10.8816	10.6361	10.4265	10.2426	10.0739	9.9135	9.76056	9.62405	9.52094	9.47447	9.51149	9.65867	9.93605	10.378	10.9903	11.7969	12.8196	14.0835	15.6153	17.4394
20.1312	23.3772	26.4652	29.2744	31.7249	33.7764	35.4185	36.6593	37.516	38.0099	38.1676	38.017	37.5905	36.9248	36.0584	35.028	33.8655	32.6048	31.2304	29.7791	28.2757	26.6775	25.0568	23.4173	21.7976	20.1649	18.5849	17.0486	15.5605	14.1244	12.7435	11.4224	10.1773	8.98902	7.86531	6.83479	5.89767	5.07155	4.36574	3.79636	3.38801	3.15439	3.10717	3.25441	3.61629	4.21649	5.07242	6.21949	7.69344	9.51768
7.70771	9.67739	11.6712	13.5897	15.3387	16.8352	18.0763	19.0137	19.679	20.1042	20.3235	20.3701	20.2746	20.0667	19.7725	19.4082	18.9834	18.5018	17.9591	17.3487	16.6979	16.0112	15.3021	14.5808	13.8528	13.123	12.3945	11.6623	10.9483	10.2574	9.60328	8.98762	8.42174	7.91435	7.46802	7.08753	6.7771	6.54417	6.41131	6.39895	6.5331	6.83879	7.3375	8.04828	8.9827	10.1744	11.6409	13.3975	15.4577	17.8106
6.94624	9.56331	12.2182	14.7592	17.0598	19.0351	20.6439	21.8812	22.7624	23.309	23.5418	23.4835	23.1636	22.6235	21.9022	21.054	20.1223	19.1439	18.1444	17.1361	16.121	15.095	14.0532	12.9931	11.917	10.8381	9.76148	8.69822	7.67208	6.68895	5.75792	4.88647	4.08108	3.34897	2.70292	2.15692	1.7291	1.43846	1.30485	1.34691	1.58384	2.03413	2.71175	3.6264	4.77982	6.20028	7.86878	9.80373	12.0169	14.5195
10.2423	12.6902	15.1459	17.4866	19.5976	21.3828	22.7701	23.7103	24.2	24.278	23.9984	23.4154	22.5756	21.5227	20.3014	18.9575	17.5443	16.0878	14.6259	13.2153	11.8692	10.5722	9.38545	8.2936	7.28425	6.3747	5.55549	4.8204	4.16575	3.583	3.06146	2.59022	2.15938	1.76478	1.41652	1.13003	0.92847	0.839303	0.898799	1.13998	1.58541	2.25454	3.16161	4.3172	5.73586	7.42884	9.41768	11.7271	14.3557	17.2999
8.47384	10.719	12.9893	15.1646	17.1434	18.8516	20.2373	21.3108	22.0839	22.5945	22.8687	22.944	22.852	22.6257	22.2824	21.8494	21.3568	20.8211	20.2569	19.6746	19.082	18.4855	17.8932	17.3151	16.7618	16.2429	15.7653	15.3305	14.937	14.5811	14.2581	13.9647	13.7005	13.4693	13.2795	13.1405	13.0691	13.0829	13.1986	13.4408	13.817	14.3534	15.0484	15.9208	16.9863	18.2656	19.7801	21.5478	23.5807	25.8817
9.73786	12.618	15.5	18.2924	20.9102	23.2216	25.1791	26.8034	28.0906	29.0197	29.602	29.8923	29.9204	29.6993	29.2586	28.6363	27.8657	26.9771	26	24.9604	23.8826	22.7821	21.6717	20.5623	19.4647	18.3906	17.3555	16.3855	15.4677	14.6383	13.919	13.3194	12.85	12.5186	12.3355	12.2991	12.4166	12.6909	13.1169	13.6939	14.4254	15.3142	16.3716	17.6084	19.0494	20.7082	22.623	24.7839	27.2076	29.8692
11.3199	13.9541	16.5743	19.0363	21.2431	23.1329	24.6558	25.8211	26.5958	27.009	27.0694	26.8146	26.2902	25.5367	24.6104	23.5529	22.4013	21.18	19.9021	18.574	17.2006	15.7863	14.3374	12.8636	11.3787	9.89723	8.43275	6.99653	5.59951	4.2541	2.97418	1.77455	0.671441	-0.317869	-1.17551	-1.88534	-2.43158	-2.80097	-2.98265	-2.96825	-2.75189	-2.3288	-1.69501	-0.848106	0.21064	1.49358	3.01255	4.76753	6.77138	9.03149
5.44406	7.01893	8.75559	10.5551	12.2909	13.8842	15.2112	16.2528	17.0234	17.564	17.9166	18.1116	18.1691	18.1054	17.9368	17.6835	17.3656	16.9992	16.5926	16.1437	15.6557	15.1183	14.5252	13.8741	13.1679	12.4138	11.6219	10.8057	9.97933	9.15579	8.34776	7.5675	6.827	6.13912	5.51903	4.98118	4.54142	4.21699	4.02707	3.99202	4.13194	4.46363	4.99704	5.73657	6.6786	7.81353	9.13298	10.6372	12.3372	14.2528
7.93539	9.17398	10.6132	12.1628	13.7214	15.1675	16.3886	17.3115	17.9255	18.2687	18.407	18.4113	18.3196	18.148	17.9019	17.5898	17.2261	16.8299	16.4081	15.9771	15.5345	15.0696	14.5655	14.0094	13.3697	12.6691	11.9001	11.0954	10.2751	9.46364	8.67977	7.93576	7.24276	6.5884	5.98813	5.44021	4.95444	4.54007	4.23374	4.05376	4.01364	4.11926	4.37087	4.77259	5.31998	6.00646	6.8506	7.85189	9.02831	10.3968
13.6704	15.3806	17.0842	18.7153	20.1998	21.4699	22.4857	23.235	23.7187	23.9529	23.9521	23.734	23.3268	22.7609	22.0547	21.2209	20.3107	19.3544	18.3667	17.3176	16.2909	15.2994	14.3465	13.4439	12.5993	11.818	11.1015	10.45	9.86257	9.33695	8.87272	8.47123	8.13133	7.86099	7.66778	7.55528	7.53638	7.6264	7.83451	8.17954	8.67413	9.33019	10.1689	11.1963	12.4324	13.8988	15.6	17.5381	19.7215	22.1331
12.7429	15.0786	17.4265	19.7502	21.8587	23.6936	25.2184	26.4194	27.3013	27.8886	28.2152	28.2852	28.1303	27.7775	27.2531	26.5835	25.7968	24.9188	23.9721	22.9729	21.9329	20.8568	19.7468	18.6063	17.4429	16.2678	15.0979	13.9537	12.8585	11.8324	10.8939	10.0588	9.33675	8.73698	8.27331	7.95049	7.77759	7.76256	7.91766	8.24428	8.74246	9.41253	10.2494	11.2519	12.4229	13.775	15.32	17.0788	19.1059	21.3731
3.38309	4.04736	4.84547	5.70122	6.51641	7.20703	7.72761	8.07128	8.25347	8.29341	8.20429	7.99417	7.6752	7.27071	6.81323	6.3363	5.86716	5.42465	5.0218	4.66685	4.36409	4.1139	3.9114	3.74725	3.60663	3.4712	3.32123	3.13856	2.91043	2.63264	2.31289	1.97058	1.63456	1.33774	1.11316	0.986429	0.975621	1.08935	1.32805	1.68639	2.15887	2.74303	3.44188	4.26846	5.24565	6.40728	7.7962	9.46094	11.4456	13.7753
9.13703	11.2454	13.5678	15.9138	18.1785	20.269	22.108	23.6393	24.8289	25.6747	26.1819	26.3752	26.2764	25.9028	25.2857	24.4608	23.4697	22.3551	21.1616	19.9154	18.6252	17.3524	16.0581	14.7676	13.4793	12.1821	10.8731	9.55561	8.24083	6.94893	5.70796	4.55839	3.52041	2.62367	1.90875	1.36244	1.02185	0.886212	0.950935	1.21805	1.68548	2.35359	3.221	4.28309	5.54591	7.03761	8.75645	10.7398	12.9914	15.5506
11.8265	15.1245	18.5423	21.8336	24.7862	27.2174	28.9738	30.0335	30.4671	30.3518	29.764	28.7705	27.4477	25.8896	24.1585	22.2253	20.2273	18.2567	16.3221	14.4511	12.7095	11.1097	9.67456	8.42025	7.36409	6.50862	5.85344	5.38381	5.07628	4.90411	4.83467	4.82859	4.86539	4.91784	4.96714	5.01198	5.0598	5.13049	5.24304	5.42299	5.69386	6.07948	6.6014	7.27443	8.11337	9.14058	10.3786	11.8545	13.6132	15.6725
15.6567	18.7247	21.6192	24.2167	26.4161	28.2285	29.5954	30.5432	31.1081	31.3286	31.2426	30.8872	30.3023	29.5183	28.5716	27.5015	26.3342	25.0987	23.8027	22.4672	21.0987	19.7391	18.3992	17.0984	15.8526	14.673	13.5662	12.5328	11.5711	10.6765	9.84003	9.04985	8.29272	7.55669	6.83406	6.12364	5.43286	4.77745	4.17983	3.66771	3.274	3.03365	2.97479	3.13612	3.54847	4.24346	5.24976	6.58884	8.27695	10.3168
9.66587	11.8876	14.023	15.9819	17.6987	19.1351	20.2742	21.1131	21.6525	21.8988	21.8709	21.6031	21.1387	20.5245	19.8051	19.017	18.1815	17.3066	16.3908	15.4309	14.4307	13.398	12.3466	11.2914	10.2488	9.23326	8.2572	7.32977	6.46076	5.65452	4.91701	4.25533	3.67225	3.1699	2.75892	2.44462	2.24259	2.17377	2.25714	2.52137	2.98826	3.6759	4.6201	5.83653	7.33524	9.14322	11.2875	13.7739	16.582	19.6825
6.0543	8.34813	10.6893	13.0087	15.19	17.0647	18.6522	19.9288	20.8359	21.3782	21.6173	21.5627	21.2248	20.6389	19.8463	18.885	17.788	16.5934	15.3401	14.0636	12.8029	11.5609	10.363	9.22853	8.1591	7.16119	6.24233	5.40904	4.66855	4.02308	3.4686	2.99509	2.59254	2.24821	1.95379	1.71361	1.53274	1.423	1.40784	1.51237	1.76782	2.19829	2.83996	3.72912	4.89435	6.3611	8.14077	10.2435	12.6775	15.4305
[truncated: 50 more columns]
