# Supplementary material for: Comparison of sagittal plane gait characteristics between the overground and treadmill approach for gait analysis in typically developing children
Source: PeerJ. 2022 Jul 22;10:e13752. doi: 10.7717/peerj.13752 (PMC9310770; doi:10.7717/peerj.13752)
Supplement: Supplemental Information 6 — Each colum represents a percentage of the gait cycle (0–100%). Every raw represents data of one child.Sheet 1 data of the overground approachSheet 2 data of the treadmill approach [file peerj-10-13752-s006.xlsx]

## Sheet: 1
-0.00378816	-0.0346018	-0.0484586	-0.0379409	-0.00282543	0.0546629	0.124173	0.210357	0.311602	0.398603	0.465937	0.518888	0.558589	0.584524	0.599068	0.607784	0.614311	0.62143	0.630439	0.640609	0.65089	0.660338	0.669271	0.677376	0.684231	0.69005	0.694615	0.698755	0.702347	0.661895	0.606	0.613903	0.699962	0.729372	0.74225	0.757691	0.775443	0.794587	0.814725	0.834295	0.853322	0.871135	0.886065	0.897035	0.901193	0.89746	0.883637	0.857774	0.819139	0.766304
-0.064777	-0.171692	-0.23991	-0.269803	-0.238301	-0.196427	-0.162782	-0.12816	-0.0815237	-0.0294495	0.0231052	0.0730436	0.121639	0.165448	0.203002	0.236789	0.268079	0.295573	0.318037	0.336308	0.351245	0.36395	0.373999	0.382726	0.390839	0.399198	0.408503	0.419868	0.433437	0.450617	0.472489	0.499555	0.533373	0.573543	0.620689	0.674021	0.732244	0.79238	0.852338	0.910817	0.966461	1.0184	1.06586	1.10703	1.13911	1.16058	1.1696	1.16594	1.14828	1.11126
-0.14314	-0.180523	-0.232837	-0.2725	-0.27111	-0.229325	-0.157246	-0.11107	-0.0455798	0.00965557	0.0500291	0.0847791	0.104975	0.120336	0.131883	0.143032	0.153409	0.163658	0.174598	0.187487	0.200975	0.215447	0.230437	0.245633	0.261317	0.277087	0.294484	0.313244	0.333555	0.356182	0.380722	0.40741	0.43487	0.46276	0.489831	0.515871	0.54086	0.56344	0.583822	0.601063	0.616056	0.626903	0.634442	0.639105	0.640501	0.636885	0.629484	0.617879	0.602519	0.582607
-0.000681229	-0.00486649	-0.0346405	-0.0586377	-0.0381643	-0.0137146	0.00771451	0.0283651	0.0634792	0.100124	0.133537	0.163444	0.185915	0.202489	0.212241	0.214556	0.211817	0.205498	0.197201	0.186356	0.176699	0.170477	0.16789	0.169828	0.176731	0.187348	0.20255	0.220993	0.242252	0.267708	0.297808	0.333268	0.374993	0.42117	0.471793	0.526053	0.5818	0.638141	0.693675	0.74656	0.79662	0.843337	0.885352	0.923078	0.953935	0.979165	1.00493	1.07786	1.14853	1.05619
-0.11385	-0.131432	-0.176326	-0.237914	-0.303175	-0.330529	-0.329242	-0.27975	-0.221776	-0.145663	-0.0577223	0.0491746	0.141732	0.220862	0.285786	0.339453	0.384237	0.422632	0.457869	0.492901	0.528708	0.56275	0.592252	0.616397	0.635672	0.655362	0.673921	0.687075	0.699421	0.706222	0.710242	0.714421	0.717686	0.720821	0.72578	0.73466	0.744128	0.757121	0.773346	0.792306	0.813772	0.839647	0.868582	0.901465	0.935202	0.965084	0.998564	1.02571	1.04164	1.03665
-0.015003	-0.0439905	-0.0578174	-0.068149	-0.0536871	-0.0252787	0.012424	0.0543728	0.0967752	0.136765	0.168452	0.189886	0.204876	0.216697	0.228212	0.24037	0.254097	0.270348	0.289961	0.313244	0.33991	0.36926	0.401058	0.435702	0.473801	0.515001	0.558693	0.604978	0.653242	0.702269	0.751796	0.80119	0.850203	0.898161	0.944031	0.986679	1.02541	1.06009	1.091	1.11836	1.14226	1.16266	1.17791	1.18655	1.18617	1.1774	1.1614	1.16677	1.19925	1.28987
0.00631311	-0.0302935	-0.0934455	-0.14866	-0.194799	-0.199469	-0.172424	-0.127997	-0.0661128	-0.00334521	0.0654066	0.118281	0.166317	0.197955	0.213625	0.222491	0.227373	0.231259	0.237702	0.248125	0.261851	0.277571	0.294199	0.312692	0.333397	0.349214	0.366969	0.385514	0.403549	0.423648	0.435908	0.450461	0.468698	0.489415	0.51208	0.536099	0.563168	0.592033	0.621919	0.651101	0.68125	0.713794	0.744719	0.774835	0.8025	0.823879	0.839585	0.847814	0.847292	0.839127
-0.0124903	-0.0318099	-0.0646144	-0.0972259	-0.10742	-0.108934	-0.103466	-0.0910823	-0.0762859	-0.060612	-0.0423758	-0.0246194	-0.00787208	0.0103852	0.0298612	0.0479859	0.0627725	0.0789798	0.0939328	0.108392	0.123302	0.137525	0.153217	0.169764	0.18899	0.209059	0.230836	0.253744	0.278365	0.305733	0.333811	0.362572	0.394495	0.427567	0.464274	0.500772	0.538608	0.578231	0.617544	0.653823	0.688233	0.719706	0.746807	0.772385	0.794341	0.815617	0.833476	0.844359	0.853608	0.859625
-0.0986637	-0.137256	-0.180442	-0.198066	-0.1851	-0.155494	-0.110106	-0.0562796	-0.00201922	0.0535034	0.107423	0.151503	0.18755	0.211722	0.226479	0.232754	0.232182	0.228399	0.223	0.216317	0.209358	0.202053	0.203883	0.211496	0.223853	0.237152	0.252034	0.269829	0.292239	0.318409	0.350041	0.386207	0.428628	0.475429	0.525749	0.57891	0.633589	0.687675	0.738952	0.786401	0.82904	0.864784	0.893541	0.913776	0.922844	0.919444	0.902878	0.873082	0.829743	0.773174
-0.0580577	-0.0975924	-0.134226	-0.151244	-0.155773	-0.130109	-0.082403	-0.0311696	0.0320582	0.0921765	0.13785	0.173777	0.201707	0.221168	0.239513	0.258546	0.279462	0.302132	0.324544	0.348487	0.374525	0.39732	0.420708	0.448373	0.473785	0.500981	0.527595	0.556029	0.582763	0.607777	0.635528	0.661308	0.68855	0.713336	0.739095	0.76653	0.792562	0.81418	0.837149	0.865965	0.893553	0.916368	0.937316	0.958162	0.973496	0.978781	0.980579	0.962916	0.93384	0.899237
-0.0229421	-0.0400504	-0.0747988	-0.0789621	-0.0202487	0.0230393	0.066356	0.117663	0.151432	0.180511	0.2006	0.213936	0.221457	0.224956	0.224654	0.221387	0.215754	0.209312	0.203746	0.202171	0.204519	0.20962	0.217529	0.228709	0.242345	0.25921	0.277796	0.298526	0.322474	0.348384	0.377755	0.409637	0.441829	0.474218	0.507906	0.543159	0.57835	0.614401	0.650408	0.685579	0.719708	0.752998	0.783736	0.810405	0.83045	0.843933	0.84835	0.841625	0.822161	0.787035
-0.080786	-0.147854	-0.166034	-0.169542	-0.161427	-0.137736	-0.104307	-0.0598677	-0.0192209	0.0230816	0.0601128	0.0976702	0.132275	0.160177	0.184329	0.202953	0.216284	0.225466	0.233265	0.240338	0.249096	0.259865	0.272743	0.288638	0.307426	0.329501	0.354318	0.382222	0.414549	0.449527	0.487007	0.527139	0.569815	0.614345	0.660895	0.709168	0.757313	0.80463	0.850551	0.893375	0.932984	0.96916	1.0004	1.02678	1.04649	1.05521	1.05406	1.04044	1.01036	0.965465
-0.11998	-0.156537	-0.172664	-0.142266	-0.0730698	0.0183259	0.113012	0.217127	0.321585	0.418114	0.501758	0.564557	0.609294	0.644635	0.676889	0.709783	0.741159	0.76889	0.790913	0.805979	0.81351	0.81384	0.808215	0.798867	0.787235	0.774968	0.763403	0.753848	0.747178	0.744172	0.745077	0.75066	0.761181	0.776435	0.797569	0.825168	0.859078	0.897442	0.939501	0.982714	1.02636	1.06949	1.11129	1.15135	1.18642	1.21374	1.22887	1.22822	1.20758	1.16177
-0.0667673	-0.127866	-0.164921	-0.1757	-0.164312	-0.129208	-0.0772235	-0.0250718	0.0304565	0.0865969	0.13363	0.158515	0.166776	0.158731	0.141055	0.12131	0.104244	0.0927808	0.08767	0.0882828	0.09277	0.100217	0.109041	0.119084	0.131861	0.146343	0.164027	0.185507	0.210936	0.240915	0.277545	0.32139	0.372084	0.429732	0.493916	0.563806	0.63779	0.714407	0.792258	0.870797	0.946695	1.01637	1.07878	1.13322	1.17881	1.21419	1.23755	1.2483	1.24722	1.23425
-0.0374084	-0.0679796	-0.100406	-0.119371	-0.0656217	-0.0206985	0.0208765	0.0805489	0.138572	0.193072	0.241392	0.278088	0.305758	0.322428	0.329085	0.329634	0.325947	0.320236	0.31544	0.314306	0.318392	0.326094	0.336512	0.349289	0.365908	0.386744	0.412613	0.442912	0.476348	0.512918	0.553521	0.597585	0.645426	0.695999	0.747084	0.79688	0.844583	0.88923	0.929398	0.964609	0.994303	1.02022	1.04243	1.06032	1.07233	1.07466	1.06301	1.03357	0.983415	0.908914
-0.0744172	-0.106673	-0.155215	-0.213042	-0.251473	-0.264302	-0.235829	-0.187369	-0.130837	-0.0704872	-0.0057025	0.0643999	0.125186	0.177659	0.223126	0.262104	0.295891	0.324684	0.349248	0.370952	0.391069	0.40987	0.428207	0.446253	0.463715	0.480983	0.498804	0.516956	0.536032	0.556023	0.577273	0.600215	0.625126	0.65158	0.679311	0.708505	0.739838	0.773632	0.810281	0.849523	0.890731	0.93261	0.973254	1.01163	1.04531	1.072	1.08911	1.09525	1.08913	1.06864
-0.059247	-0.0959249	-0.117204	-0.166069	-0.168827	-0.15365	-0.128548	-0.0917444	-0.0365029	0.0301314	0.0930945	0.152957	0.206976	0.254262	0.296098	0.334252	0.370597	0.404596	0.434688	0.460986	0.48359	0.501449	0.514238	0.522299	0.524913	0.524895	0.522099	0.51834	0.515063	0.512647	0.513284	0.516649	0.523952	0.535406	0.552803	0.575809	0.603419	0.635392	0.671837	0.713133	0.75865	0.808013	0.859097	0.909429	0.954636	0.990373	1.01454	1.02464	1.01837	0.994555
-0.0792296	-0.123964	-0.138163	-0.120515	-0.0882975	-0.0207094	0.049537	0.114254	0.172428	0.218414	0.251729	0.27135	0.282011	0.286896	0.287647	0.285881	0.282709	0.28122	0.282848	0.28938	0.302965	0.324184	0.351313	0.38204	0.415365	0.450516	0.487036	0.524726	0.563866	0.60376	0.644424	0.686565	0.730254	0.775498	0.822083	0.868772	0.915465	0.960632	1.00456	1.04612	1.08385	1.11677	1.14343	1.16211	1.17071	1.16565	1.14673	1.11135	1.05847	0.983494
-0.0144751	-0.0412159	-0.0779357	-0.0971317	-0.0792949	-0.0523699	-0.0275932	7.58549e-05	0.0394073	0.0769272	0.110661	0.140764	0.165236	0.184864	0.198668	0.209434	0.218352	0.227976	0.240448	0.256817	0.276745	0.300561	0.328198	0.359406	0.393553	0.430241	0.468312	0.506842	0.545241	0.583238	0.620368	0.656578	0.692037	0.726934	0.761524	0.796354	0.831534	0.86759	0.904591	0.943108	0.982279	1.0219	1.0615	1.09814	1.1285	1.14926	1.15564	1.1463	1.12077	1.0758
-0.0262892	-0.0327287	-0.0365369	0.00972189	0.0584486	0.128347	0.195221	0.259531	0.319591	0.370183	0.41305	0.449577	0.480433	0.507215	0.531866	0.55525	0.577383	0.599651	0.622275	0.644777	0.667215	0.68776	0.706079	0.722099	0.736838	0.751307	0.766727	0.78283	0.800289	0.821182	0.845609	0.874565	0.908032	0.946553	0.989608	1.03722	1.08932	1.14292	1.19718	1.24889	1.29623	1.33687	1.36712	1.38423	1.38402	1.36366	1.32084	1.254	1.1621	1.04401
-0.0962547	-0.126656	-0.131075	-0.121464	-0.0864452	-0.0456568	-0.00829372	0.0347457	0.0843646	0.130617	0.170975	0.206509	0.235296	0.257348	0.274132	0.287825	0.301708	0.318648	0.339033	0.362106	0.387275	0.415424	0.444766	0.475999	0.50939	0.544032	0.580003	0.616294	0.653008	0.690791	0.729159	0.767702	0.806388	0.846309	0.886015	0.925806	0.965349	1.00408	1.04335	1.08387	1.12551	1.16768	1.20841	1.24591	1.27543	1.29431	1.29856	1.28551	1.25623	1.24722
-0.0969009	-0.192545	-0.362864	-0.510431	-0.557326	-0.524708	-0.51142	-0.498912	-0.447654	-0.378676	-0.309222	-0.231069	-0.152537	-0.0844466	-0.0377047	-0.00134804	0.0287593	0.0548732	0.0788637	0.101159	0.122386	0.142932	0.162265	0.181223	0.199687	0.221455	0.248517	0.279317	0.312759	0.349464	0.389318	0.433568	0.44961	0.48918	0.543524	0.600704	0.660118	0.731565	0.843028	0.91152	0.979444	1.04495	1.10612	1.15972	1.20407	1.23696	1.25579	1.25836	1.24174	1.20424
-0.0622016	-0.110695	-0.154516	-0.175951	-0.161931	-0.12303	-0.0735294	0.00180714	0.0820327	0.143847	0.184862	0.210785	0.230655	0.249922	0.272147	0.297422	0.330497	0.367895	0.405456	0.436345	0.463478	0.483464	0.499112	0.515155	0.531533	0.547818	0.565565	0.584332	0.605502	0.62784	0.653494	0.680258	0.710645	0.744325	0.779341	0.814462	0.850694	0.891081	0.931394	0.971073	1.01321	1.0569	1.10776	1.16234	1.21627	1.26824	1.3136	1.34165	1.36	1.36003
-0.0701002	-0.129052	-0.163684	-0.17328	-0.157393	-0.138228	-0.128294	-0.103451	-0.0545675	0.00758997	0.071414	0.132749	0.187033	0.23379	0.275503	0.316012	0.356109	0.395419	0.432353	0.465551	0.495949	0.524511	0.551167	0.576169	0.599568	0.621624	0.641852	0.659854	0.67506	0.68897	0.702362	0.71677	0.732707	0.751009	0.772229	0.796471	0.823671	0.853966	0.88735	0.923298	0.96164	1.00201	1.04358	1.08535	1.12419	1.15692	1.18088	1.19344	1.19192	1.17506
-0.0258467	-0.0494693	-0.0689304	-0.0830448	-0.0784582	-0.0580607	-0.0255048	0.0193062	0.0658676	0.113631	0.159527	0.200193	0.235939	0.268595	0.298875	0.327218	0.353674	0.379126	0.403134	0.425691	0.447386	0.467825	0.487477	0.506449	0.525641	0.546696	0.570916	0.598236	0.628235	0.659872	0.69241	0.72592	0.76035	0.796749	0.834592	0.87344	0.912724	0.953093	0.993857	1.03626	1.08018	1.12428	1.16664	1.20572	1.23938	1.26595	1.2839	1.29136	1.28658	1.26863
-0.0302349	-0.0521127	-0.0714035	-0.104872	-0.115331	-0.0981401	-0.0707611	-0.0314	0.0195778	0.0736944	0.124021	0.164421	0.195427	0.218248	0.235196	0.248753	0.259988	0.270783	0.280786	0.293294	0.30896	0.328167	0.351389	0.37815	0.407906	0.441017	0.477401	0.516925	0.559278	0.605329	0.654409	0.705539	0.758075	0.811325	0.865581	0.919768	0.97336	1.02615	1.07777	1.1285	1.17725	1.22388	1.26644	1.30247	1.33008	1.34613	1.34854	1.33411	1.3196	1.28866
-0.191187	-0.283499	-0.375053	-0.450357	-0.501979	-0.510613	-0.509218	-0.504135	-0.467516	-0.397491	-0.305189	-0.211981	-0.135073	-0.072184	-0.0224959	0.0152019	0.0434118	0.0667432	0.0870394	0.111465	0.137061	0.164898	0.193018	0.219139	0.24367	0.26809	0.293862	0.321282	0.352786	0.388186	0.428881	0.478262	0.53756	0.608423	0.691437	0.785427	0.887659	0.996704	1.11109	1.22567	1.33577	1.43548	1.519	1.58235	1.62297	1.63896	1.62783	1.58688	1.51469	1.41356
-0.0306039	-0.0659473	-0.10529	-0.128659	-0.123237	-0.100588	-0.0746841	-0.0392545	0.00156626	0.0455271	0.0896589	0.127735	0.158917	0.18316	0.201674	0.216559	0.229616	0.242218	0.256278	0.273982	0.295742	0.32115	0.351075	0.384282	0.420778	0.458915	0.49879	0.540269	0.584283	0.630764	0.678707	0.72739	0.776015	0.824821	0.87388	0.922707	0.970825	1.01812	1.0662	1.11431	1.16229	1.20824	1.2492	1.282	1.3037	1.31103	1.30285	1.27871	1.2369	1.17433
-0.0178255	-0.0186038	-0.0416328	-0.104679	-0.117068	-0.0544205	0.0106556	0.057203	0.115696	0.171233	0.212176	0.242082	0.263063	0.278648	0.290308	0.299029	0.305854	0.311384	0.316834	0.324813	0.335028	0.346814	0.359727	0.374108	0.39103	0.409731	0.431485	0.456149	0.484012	0.515234	0.550591	0.59094	0.636403	0.68748	0.744391	0.806795	0.874497	0.946661	1.02207	1.09841	1.17363	1.2462	1.3156	1.37904	1.43316	1.47361	1.49799	1.505	1.49226	1.45918
-0.033747	-0.0941907	-0.163658	-0.237631	-0.260166	-0.236871	-0.218074	-0.191112	-0.144856	-0.112677	-0.0788907	-0.0269222	0.0291615	0.0738609	0.103633	0.1221	0.138435	0.154592	0.170694	0.186261	0.201565	0.218692	0.236992	0.25722	0.280391	0.305104	0.330406	0.356563	0.383719	0.412716	0.443634	0.476997	0.513549	0.552558	0.595729	0.643981	0.696322	0.754307	0.81783	0.887439	0.962304	1.0411	1.12183	1.20163	1.27659	1.34388	1.39804	1.43624	1.45563	1.45469
-0.0170182	-0.0460976	-0.0793022	-0.0939643	-0.0886031	-0.0671717	-0.0373271	-0.00538285	0.0286507	0.0661934	0.117221	0.180438	0.242118	0.294808	0.342544	0.392468	0.436259	0.473845	0.508182	0.539506	0.567649	0.594272	0.620261	0.646476	0.672348	0.697336	0.722084	0.746643	0.771376	0.796403	0.822314	0.848856	0.876642	0.904973	0.933385	0.961842	0.990617	1.01955	1.04886	1.07906	1.11088	1.14375	1.17587	1.20676	1.2361	1.26216	1.28235	1.29533	1.29906	1.29136
-0.0346482	-0.0976068	-0.14729	-0.175131	-0.178065	-0.156718	-0.099993	-0.0283491	0.0531115	0.144861	0.236936	0.328422	0.412553	0.489053	0.549913	0.598784	0.635863	0.662022	0.678072	0.684414	0.683407	0.676518	0.665342	0.65267	0.640135	0.629306	0.62119	0.615191	0.611958	0.611348	0.614564	0.622448	0.637222	0.660009	0.690692	0.727229	0.769806	0.818354	0.873309	0.933929	0.996215	1.05751	1.11649	1.17184	1.21998	1.25642	1.27454	1.27325	1.25065	1.2033
-0.0259618	-0.041908	-0.0467224	-0.05586	-0.0448711	-0.0222924	0.042693	0.121505	0.204277	0.300153	0.382402	0.453131	0.507578	0.544741	0.566066	0.5732	0.571209	0.564951	0.556175	0.548069	0.542129	0.539114	0.539064	0.540822	0.544816	0.550049	0.555305	0.560781	0.567059	0.575266	0.586859	0.603369	0.625471	0.654327	0.690149	0.734453	0.78914	0.854118	0.928777	1.01076	1.09783	1.18712	1.2752	1.35747	1.42799	1.47889	1.50511	1.50295	1.46868	1.40629
-0.0586303	-0.0912018	-0.123388	-0.138215	-0.134244	-0.116809	-0.0812063	-0.0296168	0.02465	0.0787396	0.128088	0.173608	0.21885	0.259471	0.296007	0.329905	0.361776	0.392257	0.420079	0.445136	0.46765	0.487802	0.504777	0.519621	0.533689	0.548287	0.563696	0.579595	0.596784	0.617117	0.641278	0.670032	0.703957	0.742755	0.786278	0.83301	0.883199	0.936948	0.993574	1.05188	1.11073	1.16815	1.22191	1.26979	1.30906	1.33684	1.35004	1.34473	1.31754	1.2636
-0.0265297	-0.0586	-0.0880595	-0.0772344	-0.0297871	0.0104624	0.0684002	0.13204	0.198816	0.258715	0.311195	0.356378	0.392453	0.420326	0.442616	0.464928	0.488713	0.512177	0.532834	0.549477	0.562068	0.571615	0.578588	0.583878	0.589343	0.595889	0.603618	0.612533	0.622896	0.634939	0.64952	0.66652	0.687721	0.713451	0.7433	0.777387	0.814796	0.855428	0.898675	0.943268	0.988003	1.03294	1.07727	1.1199	1.15837	1.18899	1.20814	1.21216	1.19643	1.15814
-0.00353002	-0.0300868	-0.0742875	-0.108837	-0.113768	-0.0961504	-0.0759663	-0.037313	0.0172639	0.0749824	0.127555	0.166568	0.193056	0.211298	0.22458	0.234777	0.244574	0.25555	0.26848	0.283564	0.30066	0.319808	0.341118	0.364421	0.390108	0.418715	0.450121	0.484592	0.52201	0.562697	0.606192	0.653177	0.703534	0.757189	0.813401	0.87272	0.935291	1.00139	1.07096	1.14279	1.21541	1.28729	1.35622	1.41867	1.47043	1.50832	1.52939	1.53072	1.50947	1.46254
-0.0472005	-0.0997017	-0.134949	-0.129328	-0.112179	-0.098031	-0.0547905	0.0172122	0.092432	0.172593	0.248705	0.320313	0.385432	0.443996	0.496155	0.543944	0.587143	0.626147	0.661919	0.694971	0.725701	0.754356	0.780681	0.80423	0.824847	0.842866	0.858734	0.872636	0.885402	0.897404	0.910033	0.923245	0.937017	0.95266	0.970258	0.989152	1.00978	1.03188	1.05617	1.08364	1.11564	1.1521	1.19123	1.23042	1.26548	1.29272	1.30578	1.29799	1.26475	1.20358
-0.0227387	-0.0615071	-0.10404	-0.140103	-0.138677	-0.101418	-0.0688807	-0.0249295	0.0290708	0.0859104	0.138812	0.185807	0.226402	0.262235	0.293184	0.321277	0.346929	0.369789	0.388259	0.402415	0.413079	0.422725	0.432533	0.443457	0.45645	0.471458	0.490153	0.513322	0.539924	0.569934	0.601737	0.638979	0.682066	0.730179	0.78114	0.83518	0.892659	0.952631	1.01461	1.07859	1.14409	1.21058	1.27428	1.33006	1.3745	1.40605	1.42265	1.42268	1.40565	1.37107
-0.08471	-0.120017	-0.145866	-0.127743	-0.06709	0.00606924	0.0904423	0.177885	0.260952	0.339569	0.409978	0.472486	0.528716	0.580148	0.630041	0.678022	0.721567	0.758749	0.789339	0.81144	0.826292	0.836133	0.843029	0.848893	0.854467	0.858349	0.861449	0.863553	0.86437	0.864897	0.866411	0.87001	0.876299	0.886008	0.900281	0.922798	0.953763	0.992164	1.03787	1.08786	1.14023	1.19214	1.24286	1.2916	1.33533	1.36992	1.38865	1.38469	1.35615	1.3046
-0.00841589	-0.0714041	-0.13673	-0.203312	-0.216696	-0.173873	-0.133934	-0.087279	-0.0187148	0.0603013	0.142886	0.228974	0.317973	0.407811	0.494405	0.577862	0.657895	0.73504	0.808592	0.874527	0.930532	0.976168	1.01147	1.03676	1.05277	1.06087	1.06249	1.05913	1.05262	1.0444	1.03585	1.02868	0.967562	0.817888	0.915378	1.0402	1.05812	1.08321	1.11549	1.15441	1.19879	1.2473	1.29938	1.35203	1.40163	1.44433	1.47448	1.4874	1.47753	1.43692
-0.0481339	-0.085767	-0.113845	-0.123449	-0.0986953	-0.054816	-0.00507162	0.0578057	0.122885	0.184219	0.233452	0.288707	0.350781	0.406981	0.452596	0.492695	0.530129	0.565026	0.596978	0.62634	0.654485	0.682586	0.710487	0.738274	0.76557	0.791439	0.815913	0.83941	0.862193	0.885198	0.908172	0.931667	0.955496	0.981358	1.00875	1.03792	1.06828	1.101	1.13657	1.17458	1.21575	1.25963	1.30413	1.34843	1.38872	1.42165	1.4435	1.44954	1.43508	1.39694
-0.0453013	-0.087279	-0.136089	-0.169792	-0.16896	-0.145772	-0.123046	-0.0936535	-0.0509221	-0.00669095	0.0362352	0.0738202	0.103989	0.128422	0.148071	0.164169	0.178443	0.191498	0.203819	0.216576	0.231771	0.251848	0.277543	0.308747	0.345033	0.385505	0.429367	0.476367	0.525742	0.577888	0.633238	0.691521	0.752165	0.814396	0.878359	0.94362	1.0104	1.07757	1.14513	1.21247	1.27789	1.34006	1.39711	1.4469	1.4873	1.51595	1.52966	1.52639	1.50409	1.46306
-0.0322345	-0.092387	-0.142016	-0.169287	-0.178735	-0.174411	-0.16472	-0.14164	-0.105487	-0.0653268	-0.0252591	0.013363	0.0477769	0.086161	0.130001	0.17455	0.220113	0.268035	0.313136	0.355398	0.392797	0.425191	0.453937	0.480401	0.505455	0.529943	0.550177	0.567523	0.582019	0.596538	0.611861	0.629143	0.650174	0.676138	0.709648	0.750295	0.79736	0.848658	0.905767	0.968361	1.0372	1.1137	1.18878	1.26434	1.3354	1.39204	1.43819	1.46855	1.47757	1.46237
-0.0200006	-0.0458602	-0.0729221	-0.0768494	-0.0445272	-0.00271774	0.0273698	0.0600772	0.0890814	0.113958	0.132488	0.144106	0.151937	0.157228	0.159994	0.162199	0.164983	0.169515	0.175728	0.183106	0.192658	0.205576	0.22246	0.242666	0.265615	0.290949	0.318843	0.348164	0.37906	0.410883	0.443872	0.478655	0.516171	0.55733	0.602387	0.650399	0.700689	0.752457	0.805517	0.859502	0.913193	0.96592	1.01695	1.06501	1.10847	1.14585	1.17571	1.19685	1.2081	1.20834
-0.0488587	-0.0830806	-0.129078	-0.167028	-0.176146	-0.160925	-0.143155	-0.126142	-0.102039	-0.0751868	-0.0449645	-0.011091	0.0233503	0.0520732	0.0735509	0.0894652	0.102174	0.115257	0.131046	0.150419	0.173262	0.199953	0.231777	0.268543	0.309522	0.353941	0.40167	0.45187	0.503927	0.557859	0.613495	0.670453	0.728328	0.787276	0.847425	0.909014	0.971814	1.03541	1.09921	1.16235	1.22364	1.28142	1.33386	1.37853	1.41204	1.43132	1.43329	1.41455	1.37557	1.30762
-0.0178008	-0.0667265	-0.115638	-0.139924	-0.136199	-0.123871	-0.110005	-0.0717305	-0.0228602	0.0289386	0.0766645	0.113643	0.140255	0.15842	0.170804	0.179428	0.186834	0.196022	0.208201	0.222276	0.236703	0.251629	0.268107	0.286542	0.307185	0.329838	0.354388	0.380644	0.408877	0.438744	0.471329	0.507352	0.547661	0.592976	0.643648	0.699914	0.760313	0.824035	0.890193	0.958949	1.02919	1.09934	1.16662	1.22807	1.2813	1.32443	1.35614	1.37478	1.3779	1.36364
-0.0680907	-0.137853	-0.181543	-0.175569	-0.131729	-0.0746526	-0.00276545	0.0746795	0.150805	0.22405	0.292073	0.355912	0.414952	0.468593	0.515913	0.558323	0.597926	0.634904	0.668124	0.696557	0.719754	0.737461	0.749875	0.757203	0.761074	0.763178	0.764796	0.766851	0.769878	0.774299	0.780023	0.787395	0.797192	0.809753	0.825177	0.843532	0.86477	0.889039	0.917202	0.950599	0.989209	1.03209	1.07703	1.12115	1.16015	1.19224	1.21323	1.21926	1.2082	1.17703
-0.0615626	-0.115487	-0.18794	-0.240477	-0.263445	-0.248002	-0.233745	-0.211558	-0.176538	-0.137791	-0.092244	-0.0448023	0.000424496	0.0423674	0.082075	0.120641	0.158417	0.195279	0.230495	0.263394	0.293588	0.321458	0.347723	0.372337	0.395345	0.418124	0.440436	0.462439	0.485382	0.509296	0.535691	0.564435	0.59711	0.632996	0.671573	0.713936	0.760657	0.810848	0.86349	0.917843	0.973323	1.02915	1.08477	1.13781	1.18823	1.23422	1.27311	1.30087	1.3139	1.30567
-0.0377904	-0.11326	-0.196232	-0.25271	-0.253347	-0.218141	-0.17264	-0.114816	-0.0465603	0.028314	0.113032	0.206745	0.302287	0.395223	0.482145	0.561106	0.631149	0.690571	0.739152	0.777335	0.805445	0.824578	0.836104	0.842369	0.844782	0.844174	0.842246	0.840645	0.84101	0.844925	0.852576	0.864559	0.880716	0.901565	0.92673	0.955664	0.987742	1.02273	1.06033	1.10054	1.14253	1.1854	1.22765	1.26622	1.29773	1.31968	1.33064	1.32905	1.31357	1.28237
0.015151	-0.0686524	-0.144525	-0.174086	-0.201745	-0.20139	-0.171886	-0.125202	-0.0615959	0.0166274	0.0951152	0.164436	0.230295	0.291107	0.348652	0.403917	0.45795	0.507557	0.550924	0.587678	0.617989	0.641749	0.663643	0.684047	0.705531	0.725208	0.742521	0.759493	0.776954	0.796551	0.818203	0.841855	0.86756	0.896893	0.927805	0.961144	0.997582	1.03522	1.07431	1.11827	1.16388	1.21391	1.2656	1.31395	1.35504	1.39032	1.41603	1.42569	1.42285	1.40529
-0.0430109	-0.0927389	-0.130542	-0.159105	-0.171443	-0.168734	-0.157818	-0.125223	-0.086373	-0.0451068	-0.00337174	0.0364189	0.0782285	0.121719	0.16835	0.215807	0.260936	0.304228	0.345983	0.386365	0.426235	0.466504	0.506434	0.546869	0.586336	0.62255	0.655863	0.685896	0.714072	0.740916	0.768814	0.798578	0.823921	0.855606	0.890462	0.925277	0.962274	1.00164	1.04548	1.09144	1.13888	1.1857	1.23367	1.28341	1.3331	1.37633	1.40985	1.43043	1.43487	1.42239
-0.0222292	-0.0746815	-0.127438	-0.162822	-0.196833	-0.187691	-0.14684	-0.101601	-0.0427472	0.0169235	0.0715938	0.118432	0.156336	0.189361	0.22006	0.247416	0.272857	0.296919	0.319566	0.339952	0.358292	0.375365	0.392089	0.408873	0.42613	0.445043	0.46584	0.488705	0.513433	0.540819	0.570834	0.603037	0.63769	0.675218	0.716109	0.761225	0.810634	0.864664	0.923592	0.986493	1.05243	1.12125	1.18995	1.25847	1.32503	1.38745	1.44363	1.4894	1.52037	1.53307
-0.0742659	-0.142518	-0.19821	-0.228027	-0.212609	-0.193764	-0.188631	-0.172277	-0.138758	-0.0959404	-0.0453013	0.00621883	0.0541349	0.0986093	0.139769	0.179226	0.217252	0.253207	0.287514	0.319694	0.349328	0.377385	0.404007	0.430105	0.45612	0.481508	0.506742	0.53205	0.557716	0.584523	0.613182	0.645273	0.681074	0.721314	0.766848	0.818912	0.877141	0.940578	1.00778	1.07669	1.14551	1.21242	1.2737	1.3251	1.36385	1.38734	1.39228	1.37621	1.33797	1.27616
-0.0104794	-0.0363566	-0.0731867	-0.107136	-0.123608	-0.117759	-0.0966326	-0.0700623	-0.0330268	0.010828	0.0496968	0.0840716	0.11351	0.141012	0.166838	0.191678	0.216475	0.243067	0.272744	0.303525	0.333226	0.362231	0.390848	0.420516	0.451858	0.484562	0.519031	0.556452	0.597822	0.642874	0.691137	0.741324	0.793795	0.848127	0.904907	0.961685	1.01911	1.07795	1.13857	1.20001	1.26125	1.31979	1.37361	1.42126	1.46199	1.4939	1.51383	1.519	1.50576	1.47042
-0.0117955	-0.0490828	-0.108348	-0.141957	-0.130245	-0.115774	-0.0935839	-0.0559221	-0.015816	0.0192339	0.0460148	0.0667697	0.0845666	0.101612	0.117875	0.133914	0.151259	0.172326	0.197059	0.222874	0.24842	0.273645	0.300691	0.332145	0.368452	0.408145	0.449705	0.492292	0.537356	0.585666	0.637013	0.690238	0.744585	0.800377	0.858143	0.917826	0.978645	1.03901	1.09827	1.1558	1.21167	1.26439	1.31241	1.35433	1.38808	1.411	1.41997	1.41179	1.38402	1.33566
-0.0169606	-0.0598707	-0.108162	-0.139507	-0.123658	-0.108481	-0.090996	-0.0662955	-0.0364049	-0.00481108	0.0271427	0.0578501	0.0867224	0.113819	0.141445	0.171503	0.205221	0.241249	0.277583	0.312992	0.348305	0.384543	0.421282	0.457287	0.491537	0.525026	0.557509	0.588806	0.618434	0.646288	0.673563	0.702173	0.732996	0.765736	0.800192	0.837744	0.879393	0.925747	0.976829	1.03203	1.09002	1.14982	1.20983	1.26822	1.32259	1.37205	1.41561	1.44954	1.46913	1.47051
[truncated: 11 more columns]

## Sheet: 2
-0.1591	-0.151209	-0.120563	-0.0638394	0.0159414	0.107777	0.198385	0.28502	0.364976	0.439055	0.507488	0.5677	0.620518	0.665921	0.704801	0.73453	0.756013	0.769341	0.774909	0.774671	0.769347	0.757445	0.739133	0.715776	0.686667	0.656772	0.635936	0.627564	0.632481	0.650192	0.674582	0.700348	0.727824	0.757933	0.791362	0.824747	0.855818	0.884162	0.911152	0.941033	0.973472	1.00691	1.03699	1.05788	1.06428	1.05483	1.02857	0.987681	0.928858	0.851297
-0.20756	-0.202815	-0.182503	-0.150805	-0.111434	-0.0665903	-0.0136024	0.0449774	0.105585	0.164222	0.217383	0.264204	0.305938	0.343984	0.378482	0.411526	0.443695	0.47151	0.490996	0.498443	0.492667	0.477679	0.458831	0.441928	0.432572	0.435262	0.451454	0.478989	0.51534	0.558581	0.607578	0.661031	0.717009	0.774547	0.832678	0.89253	0.954407	1.01724	1.0784	1.13502	1.18272	1.21633	1.2327	1.22948	1.20444	1.16107	1.10434	1.03145	0.937647	0.823007
-0.217286	-0.220528	-0.199054	-0.158719	-0.107988	-0.0543354	-0.000661101	0.0525854	0.104862	0.155132	0.207535	0.257481	0.300746	0.333703	0.355384	0.367432	0.373873	0.376857	0.376391	0.371743	0.36346	0.354046	0.346925	0.345722	0.35133	0.361806	0.374016	0.384996	0.396215	0.410136	0.430599	0.459333	0.494743	0.534653	0.577807	0.622566	0.667755	0.710379	0.750996	0.783735	0.805173	0.815481	0.815369	0.806312	0.790306	0.768968	0.742315	0.708501	0.665374	0.612267
-0.170984	-0.138124	-0.107186	-0.0825499	-0.068518	-0.0666443	-0.0673318	-0.0646274	-0.0573736	-0.0425633	-0.0193969	0.0105811	0.0466473	0.0831696	0.112074	0.132776	0.140099	0.134025	0.119686	0.104021	0.0940134	0.0944143	0.107568	0.133244	0.169121	0.21228	0.258841	0.304726	0.347946	0.388063	0.425203	0.463241	0.506371	0.555235	0.610437	0.670264	0.730878	0.789307	0.842144	0.885095	0.91514	0.92996	0.929132	0.914359	0.887581	0.852782	0.813021	0.768712	0.716148	0.652083
-0.251909	-0.198118	-0.119413	-0.0325234	0.0521515	0.128946	0.194828	0.249086	0.295998	0.344806	0.404403	0.477096	0.555304	0.628672	0.68966	0.732913	0.756638	0.762761	0.75643	0.743344	0.729819	0.723336	0.726833	0.73522	0.740884	0.74141	0.737562	0.730905	0.722073	0.711696	0.704689	0.710309	0.73075	0.760409	0.79406	0.828332	0.861008	0.890038	0.915705	0.939923	0.961023	0.977657	0.988223	0.988702	0.973126	0.938822	0.889598	0.828542	0.756461	0.673164
-0.196837	-0.201682	-0.185201	-0.15181	-0.107957	-0.0595154	-0.0108154	0.0353425	0.0759798	0.110987	0.140422	0.16323	0.181607	0.196825	0.208804	0.218807	0.228899	0.238858	0.248082	0.256316	0.26358	0.26946	0.274907	0.283696	0.300677	0.329613	0.371102	0.421556	0.476805	0.534092	0.592094	0.649225	0.704442	0.756837	0.808487	0.859267	0.908751	0.957956	1.00631	1.05192	1.09212	1.12471	1.14626	1.15457	1.14904	1.12953	1.09514	1.04599	0.980675	0.900268
-0.0655	-0.107758	-0.154535	-0.187439	-0.19802	-0.186086	-0.153909	-0.110278	-0.0681768	-0.0299545	0.00978788	0.0473889	0.0825606	0.118788	0.151788	0.181561	0.212737	0.241636	0.261682	0.275182	0.284374	0.287591	0.289111	0.29499	0.305167	0.322333	0.350949	0.384955	0.419005	0.452783	0.480227	0.499556	0.51454	0.528167	0.542141	0.56102	0.589545	0.615268	0.659848	0.700197	0.723818	0.754242	0.7875	0.805899	0.837056	0.856227	0.861566	0.87497	0.87853	0.869944
-0.193923	-0.197697	-0.193022	-0.188874	-0.191399	-0.201573	-0.216696	-0.23112	-0.237803	-0.231472	-0.210801	-0.177568	-0.136346	-0.0956449	-0.064749	-0.0489114	-0.0465375	-0.0504254	-0.0521416	-0.0454268	-0.0277259	-0.000631702	0.0301368	0.0580198	0.0795787	0.0957799	0.110093	0.12711	0.150129	0.181157	0.221024	0.268774	0.321008	0.373141	0.420909	0.462779	0.49958	0.534062	0.569247	0.606323	0.644847	0.682423	0.714891	0.738373	0.750346	0.750026	0.738653	0.717975	0.689871	0.656499
-0.180493	-0.167835	-0.141871	-0.104456	-0.0571999	-0.00687758	0.0455893	0.0991785	0.151264	0.200137	0.243759	0.283502	0.318768	0.349409	0.373327	0.386905	0.393576	0.396971	0.401379	0.409353	0.420327	0.430941	0.439633	0.445803	0.450052	0.456026	0.466539	0.484513	0.51207	0.547339	0.588087	0.632229	0.679066	0.72995	0.784032	0.839073	0.891738	0.938661	0.978383	1.00993	1.03283	1.04638	1.04947	1.04221	1.02428	0.99336	0.946969	0.879595	0.794186	0.69366
-0.198857	-0.172447	-0.143115	-0.11081	-0.0728745	-0.0304545	0.0082381	0.03629	0.0568268	0.0822597	0.119709	0.165889	0.214874	0.259924	0.297221	0.327524	0.353775	0.375895	0.393961	0.408214	0.421782	0.440359	0.46673	0.499874	0.535584	0.570403	0.603749	0.634948	0.662033	0.684038	0.703506	0.724038	0.747356	0.773619	0.800902	0.826152	0.85026	0.875381	0.902815	0.930277	0.952993	0.967224	0.971264	0.963283	0.942302	0.907662	0.857061	0.789436	0.70897	0.620203
-0.164833	-0.140798	-0.0968354	-0.0428611	0.0087258	0.044592	0.0578258	0.0563575	0.051463	0.050767	0.0560347	0.0661389	0.077935	0.0903329	0.103047	0.116249	0.123158	0.11694	0.0973845	0.0707984	0.0459118	0.0305253	0.0301319	0.0471763	0.0799937	0.123735	0.171599	0.216398	0.253375	0.282376	0.307652	0.335847	0.371159	0.413646	0.462266	0.513951	0.565339	0.613718	0.656577	0.688669	0.708825	0.717501	0.716616	0.708412	0.695586	0.678377	0.656962	0.630471	0.595767	0.550299
-0.217281	-0.188718	-0.137082	-0.0713636	-0.00406408	0.0468084	0.0877235	0.123158	0.16167	0.204969	0.247342	0.287417	0.32109	0.347973	0.36985	0.38584	0.395242	0.400691	0.404227	0.40828	0.414746	0.423241	0.433118	0.443285	0.451455	0.459134	0.469342	0.486767	0.515673	0.556601	0.606992	0.66246	0.720233	0.77901	0.838332	0.897043	0.953014	1.00511	1.0517	1.09158	1.12292	1.14936	1.16573	1.16946	1.1617	1.14342	1.11549	1.07254	1.00532	0.909061
-0.01625	-0.0633157	-0.120667	-0.176795	-0.207303	-0.191073	-0.135545	-0.0671616	0.000411616	0.0783182	0.179962	0.298944	0.41928	0.531907	0.636268	0.726682	0.796715	0.850376	0.885614	0.92424	0.94279	0.946068	0.932083	0.905545	0.875917	0.846525	0.813465	0.777477	0.746606	0.724311	0.707735	0.694525	0.687131	0.685417	0.685924	0.688409	0.698182	0.717785	0.745414	0.77975	0.821174	0.866192	0.922439	0.993598	1.05822	1.11552	1.16085	1.19491	1.21867	1.23128
-0.204059	-0.170414	-0.123805	-0.0786693	-0.0406378	-0.00631373	0.0309554	0.0766171	0.12899	0.184249	0.241022	0.299039	0.351867	0.386619	0.391211	0.365242	0.32102	0.274413	0.236444	0.211343	0.197033	0.190622	0.188176	0.187485	0.186905	0.186572	0.189266	0.199099	0.220611	0.256124	0.305357	0.36786	0.440173	0.516627	0.591721	0.662716	0.730094	0.796985	0.866911	0.941396	1.01876	1.09566	1.16669	1.22542	1.26533	1.28223	1.27557	1.24726	1.19771	1.12578
-0.152073	-0.143736	-0.125026	-0.102487	-0.079168	-0.0530086	-0.0175277	0.0326822	0.0952111	0.161605	0.224469	0.281003	0.329494	0.367091	0.391597	0.404769	0.412389	0.419742	0.430703	0.446966	0.467664	0.490132	0.512176	0.533095	0.552911	0.571452	0.589136	0.608044	0.631651	0.663528	0.70311	0.747386	0.793222	0.839301	0.884238	0.926306	0.965022	1.00155	1.03664	1.07096	1.10524	1.1398	1.17282	1.19866	1.21054	1.20606	1.18439	1.14717	1.09293	1.01549
-0.234724	-0.242248	-0.23011	-0.208202	-0.184876	-0.164097	-0.142019	-0.109208	-0.064947	-0.0145612	0.0383661	0.0927419	0.148487	0.20377	0.253316	0.292563	0.320167	0.338172	0.350583	0.360732	0.369861	0.377283	0.38281	0.388562	0.398318	0.414255	0.434946	0.457679	0.481809	0.508708	0.540798	0.578756	0.621427	0.666769	0.714555	0.764919	0.817686	0.871298	0.923638	0.972737	1.01674	1.05421	1.08328	1.10162	1.10636	1.09558	1.06932	1.02573	0.961372	0.875954
-0.18419	-0.186021	-0.174354	-0.149877	-0.113613	-0.0658692	-0.00652958	0.0610856	0.129649	0.194753	0.256908	0.318429	0.37759	0.427228	0.462413	0.485403	0.501808	0.516433	0.531108	0.543225	0.55001	0.551387	0.550741	0.552581	0.559993	0.572228	0.587198	0.604039	0.623662	0.646449	0.670642	0.694215	0.71896	0.748222	0.783209	0.822731	0.864684	0.909272	0.957216	1.00747	1.05779	1.10496	1.14401	1.17073	1.18189	1.17819	1.16086	1.12795	1.07413	0.994548
-0.230871	-0.187824	-0.11575	-0.0271271	0.0645152	0.141715	0.197976	0.239657	0.271157	0.29422	0.312953	0.333265	0.359483	0.395174	0.439556	0.486238	0.529279	0.564539	0.589592	0.603832	0.607934	0.603732	0.592828	0.578241	0.564431	0.559507	0.570335	0.597953	0.638675	0.685109	0.729	0.766145	0.797831	0.827355	0.856904	0.889157	0.925323	0.965904	1.01076	1.05728	1.10157	1.13953	1.16606	1.17709	1.16864	1.14064	1.09184	1.02425	0.936213	0.83066
-0.155573	-0.135321	-0.103157	-0.0641883	-0.0218215	0.0226226	0.0699624	0.119653	0.170126	0.220154	0.268214	0.31339	0.353587	0.386124	0.41051	0.427869	0.43978	0.447045	0.448681	0.44513	0.437439	0.427823	0.419969	0.417764	0.424175	0.439316	0.460926	0.486571	0.515708	0.549702	0.589286	0.633259	0.680243	0.730804	0.78647	0.847229	0.912175	0.979431	1.04652	1.11053	1.17062	1.22123	1.26028	1.28537	1.29456	1.28637	1.26051	1.21306	1.13822	1.03566
-0.174794	-0.136453	-0.0738815	-3.0303e-05	0.0769355	0.156654	0.242742	0.334921	0.42411	0.496091	0.546655	0.583614	0.615906	0.647831	0.679804	0.709078	0.733503	0.754013	0.771412	0.783765	0.789716	0.789961	0.790941	0.796627	0.807459	0.820768	0.834448	0.848765	0.866362	0.889582	0.917399	0.947275	0.978506	1.01256	1.05056	1.09128	1.13327	1.17517	1.21617	1.25572	1.29298	1.32555	1.34919	1.35985	1.35178	1.31959	1.26024	1.17202	1.05444	0.910342
-0.217219	-0.187116	-0.142699	-0.094857	-0.0524381	-0.0251323	-0.00555587	0.0162352	0.0427188	0.0738892	0.107366	0.142771	0.182179	0.228991	0.281475	0.332158	0.373463	0.400223	0.412957	0.416129	0.414823	0.41378	0.415816	0.422532	0.435365	0.456132	0.485812	0.521901	0.56153	0.601022	0.638634	0.675163	0.712284	0.751469	0.793842	0.839364	0.887875	0.939069	0.99186	1.04433	1.09312	1.13432	1.16499	1.18209	1.18132	1.15902	1.11431	1.05048	0.967909	0.867873
-0.175778	-0.162532	-0.128668	-0.0960662	-0.0852338	-0.0978743	-0.116273	-0.119764	-0.099636	-0.0592424	-0.00486457	0.0603951	0.132613	0.202354	0.257351	0.290982	0.307193	0.315146	0.322953	0.334827	0.351738	0.374515	0.404103	0.437355	0.468639	0.493156	0.510502	0.525172	0.542779	0.568031	0.602205	0.645	0.696054	0.753926	0.815063	0.873261	0.92437	0.968028	1.00914	1.05249	1.09964	1.14905	1.19599	1.23455	1.25964	1.26639	1.25341	1.21979	1.16085	1.08364
-0.1406	-0.127786	-0.0988646	-0.0709273	-0.0520621	-0.0357308	-0.00989091	0.0298005	0.0807146	0.140645	0.20757	0.275856	0.337294	0.38391	0.413533	0.431794	0.447841	0.467063	0.49055	0.518251	0.547387	0.573652	0.595	0.614063	0.634565	0.657268	0.681074	0.7072	0.737741	0.77137	0.805815	0.840868	0.87701	0.915983	0.959358	1.00642	1.05499	1.10403	1.15305	1.20214	1.25142	1.30164	1.35269	1.40087	1.43881	1.4599	1.46235	1.44501	1.40219	1.33068
-0.17312	-0.166022	-0.141429	-0.115781	-0.0982727	-0.0848026	-0.0638408	-0.0276739	0.0227395	0.0822885	0.146362	0.210717	0.269235	0.31601	0.348768	0.370137	0.386754	0.405317	0.428806	0.455577	0.482688	0.508405	0.531887	0.551885	0.569577	0.587031	0.609647	0.640661	0.679227	0.722569	0.767562	0.812768	0.856294	0.895556	0.931507	0.966974	1.00546	1.0491	1.09778	1.1481	1.19554	1.23602	1.26621	1.28286	1.28389	1.26819	1.23651	1.18984	1.12615	1.04079
-0.141744	-0.140519	-0.116113	-0.0835695	-0.0557599	-0.0315765	-0.00186014	0.0411974	0.0967014	0.156385	0.214378	0.271387	0.327191	0.377348	0.41619	0.440588	0.452724	0.459227	0.466625	0.477177	0.490265	0.503026	0.512721	0.519354	0.526274	0.537676	0.555299	0.577154	0.600601	0.625741	0.655706	0.691543	0.731681	0.774803	0.820199	0.868028	0.920177	0.977328	1.03757	1.09796	1.15614	1.21034	1.25997	1.30424	1.33986	1.36378	1.37324	1.36581	1.34065	1.29377
-0.13437	-0.137681	-0.129392	-0.111003	-0.083379	-0.0506057	-0.0152424	0.024695	0.0691891	0.116051	0.1627	0.205366	0.243091	0.274723	0.29846	0.316601	0.329985	0.342412	0.356371	0.375159	0.396955	0.420425	0.444517	0.469039	0.493942	0.518952	0.545003	0.573312	0.606096	0.645822	0.69361	0.748023	0.806995	0.86837	0.93015	0.99045	1.04754	1.0992	1.1453	1.18477	1.21738	1.24308	1.26046	1.26879	1.26646	1.25117	1.22189	1.17721	1.11516	1.0334
-0.193687	-0.212829	-0.197803	-0.156507	-0.106462	-0.0623116	-0.0263813	0.0101904	0.0563134	0.110921	0.167085	0.218413	0.264089	0.305245	0.339076	0.366076	0.387369	0.404731	0.419915	0.433315	0.443685	0.447343	0.446055	0.444651	0.448349	0.45803	0.472198	0.491393	0.519287	0.558571	0.609175	0.667304	0.732999	0.806473	0.88699	0.974638	1.06946	1.17031	1.27443	1.37884	1.4802	1.57479	1.65806	1.72507	1.77139	1.79211	1.78254	1.74102	1.66585	1.55032
-0.173484	-0.128272	-0.0704471	-0.01865	0.0187527	0.0445331	0.0673783	0.0928612	0.118781	0.143977	0.173522	0.212946	0.262516	0.317299	0.369695	0.41223	0.440471	0.457083	0.46734	0.475579	0.484925	0.499185	0.523208	0.558546	0.601976	0.647455	0.69087	0.731786	0.771995	0.812532	0.853396	0.896312	0.944342	0.999312	1.0607	1.12541	1.18933	1.24745	1.29649	1.33613	1.36767	1.39014	1.4021	1.40095	1.38456	1.35329	1.30331	1.22526	1.11678	0.984322
-0.139806	-0.164361	-0.159655	-0.132722	-0.092812	-0.041726	0.0225748	0.0967478	0.167906	0.220736	0.250283	0.264	0.271758	0.278031	0.287493	0.304582	0.327386	0.350001	0.367724	0.378015	0.379236	0.372853	0.366581	0.369557	0.383908	0.408599	0.443651	0.489938	0.545589	0.603416	0.655525	0.701891	0.750221	0.806613	0.872774	0.947996	1.03232	1.12213	1.21085	1.29332	1.36689	1.42972	1.48071	1.51995	1.54686	1.55794	1.54959	1.52264	1.47372	1.38894
-0.176958	-0.17957	-0.163928	-0.145933	-0.13627	-0.133806	-0.128095	-0.111331	-0.085657	-0.0565682	-0.0260707	0.00656944	0.0413119	0.0759941	0.106142	0.129307	0.147061	0.163575	0.181345	0.19897	0.216378	0.235919	0.258921	0.282454	0.304871	0.329916	0.362866	0.403883	0.447953	0.489928	0.531092	0.576246	0.626606	0.680833	0.737263	0.794341	0.853254	0.916395	0.984206	1.05257	1.11589	1.17088	1.21538	1.24766	1.26704	1.27577	1.27648	1.26425	1.22902	1.16761
-0.182867	-0.174523	-0.139923	-0.100632	-0.0725481	-0.05867	-0.0502303	-0.0366815	-0.0142364	0.015497	0.0526391	0.0992444	0.152535	0.202646	0.241244	0.264343	0.274463	0.279702	0.288376	0.312603	0.343248	0.378978	0.41483	0.444168	0.463002	0.474584	0.48672	0.508103	0.543284	0.588774	0.641044	0.696506	0.752582	0.8032	0.843277	0.875026	0.904309	0.937228	0.979278	1.03116	1.08807	1.14336	1.191	1.22616	1.24679	1.25119	1.24024	1.21938	1.19298	1.15432
-0.2008	-0.159092	-0.101201	-0.0362727	0.029499	0.0931864	0.156721	0.227333	0.305345	0.380659	0.459867	0.545872	0.638586	0.734238	0.816598	0.868086	0.892568	0.889577	0.876277	0.861675	0.847258	0.831573	0.813967	0.796427	0.781452	0.768394	0.754537	0.737395	0.717164	0.698263	0.684356	0.677152	0.678184	0.689	0.711771	0.744728	0.783664	0.825277	0.867635	0.910153	0.953367	0.997094	1.03901	1.07522	1.10102	1.11004	1.09707	1.05967	1.00075	0.920921
-0.182091	-0.167455	-0.12568	-0.0745179	-0.0277006	0.0114399	0.0504711	0.106265	0.183461	0.270545	0.350988	0.417859	0.472251	0.518404	0.555642	0.575551	0.585511	0.58564	0.572967	0.557763	0.541867	0.523824	0.503303	0.481499	0.461355	0.446151	0.436479	0.432215	0.435004	0.447161	0.469972	0.50381	0.546392	0.592788	0.641412	0.692871	0.749231	0.811544	0.88027	0.955824	1.0322	1.11545	1.20479	1.28293	1.34697	1.38863	1.40263	1.38924	1.35158	1.28503
-0.137465	-0.116802	-0.0843273	-0.0593058	-0.0538794	-0.0640015	-0.0750803	-0.0763271	-0.0646028	-0.0380275	0.00608504	0.063593	0.11885	0.15556	0.167388	0.160851	0.148961	0.143373	0.149746	0.168139	0.19465	0.223693	0.252744	0.279026	0.303299	0.329016	0.361455	0.403628	0.457562	0.522587	0.59513	0.669135	0.737839	0.797818	0.851902	0.907699	0.970755	1.0404	1.11267	1.1831	1.24608	1.29816	1.33515	1.35796	1.36563	1.35959	1.33804	1.29798	1.2377	1.1549
-0.151314	-0.156861	-0.140777	-0.117179	-0.0959498	-0.0692186	-0.0222948	0.0466896	0.123188	0.190077	0.245426	0.290679	0.326908	0.35402	0.37413	0.391488	0.409884	0.430898	0.453697	0.471272	0.480271	0.484466	0.485478	0.485365	0.486677	0.494745	0.51368	0.543036	0.57715	0.611734	0.645979	0.680424	0.715387	0.753724	0.796871	0.844189	0.897009	0.955486	1.01802	1.0794	1.13454	1.1834	1.2269	1.26363	1.28928	1.30148	1.29776	1.27731	1.23492	1.16343
-0.138657	-0.126974	-0.0896048	-0.0488606	-0.0257843	-0.0253437	-0.0328117	-0.0277619	-0.000911544	0.0437844	0.097268	0.152143	0.203384	0.247077	0.279638	0.298389	0.304287	0.302701	0.299404	0.29803	0.302103	0.314539	0.334156	0.356116	0.376135	0.394767	0.417797	0.451614	0.498059	0.555581	0.622067	0.694639	0.769608	0.844348	0.917647	0.990267	1.06446	1.14274	1.22596	1.31314	1.40148	1.4861	1.56039	1.61747	1.65213	1.66262	1.64557	1.60135	1.53088	1.4321
-0.173422	-0.163783	-0.126892	-0.0835933	-0.0476927	-0.0150842	0.0273118	0.088033	0.162323	0.240651	0.31967	0.400714	0.47999	0.554408	0.620174	0.675092	0.723065	0.765461	0.80043	0.824914	0.840139	0.852312	0.864751	0.874816	0.879646	0.88049	0.881716	0.885491	0.89033	0.89476	0.900568	0.910448	0.924788	0.941793	0.960831	0.98248	1.0077	1.03681	1.06866	1.10122	1.13254	1.16225	1.19144	1.21404	1.22625	1.2245	1.20827	1.1778	1.12874	1.05429
-0.20241	-0.175008	-0.121091	-0.0636751	-0.0170129	0.0177325	0.0478339	0.0807565	0.117517	0.155303	0.197242	0.24657	0.301821	0.35201	0.387447	0.405661	0.408086	0.400417	0.391436	0.387881	0.391989	0.403912	0.424371	0.450312	0.475334	0.495531	0.512349	0.531598	0.557538	0.591384	0.632516	0.682253	0.742311	0.81139	0.88319	0.95293	1.01906	1.08101	1.14255	1.2063	1.27223	1.33848	1.40084	1.45454	1.49502	1.51703	1.51777	1.49793	1.45735	1.39254
-0.142973	-0.136084	-0.0904169	-0.0243952	0.0452351	0.118803	0.203812	0.300334	0.39852	0.492413	0.581876	0.664252	0.734735	0.792012	0.838238	0.875523	0.90159	0.911487	0.907236	0.897942	0.889977	0.881476	0.870734	0.862173	0.858854	0.857244	0.854924	0.855416	0.861356	0.870962	0.88255	0.896484	0.913602	0.934378	0.958216	0.985153	1.0166	1.05394	1.09545	1.1368	1.17473	1.20905	1.23775	1.25791	1.26481	1.25661	1.23323	1.19267	1.12709	1.03052
-0.156079	-0.147998	-0.113516	-0.0687898	-0.0269206	0.0129469	0.0617504	0.120256	0.183954	0.248469	0.313254	0.377053	0.439614	0.501647	0.563831	0.626554	0.687169	0.742776	0.79271	0.835829	0.875455	0.914066	0.949882	0.982802	1.01493	1.04779	1.08028	1.10986	1.13463	1.15693	1.17688	1.19656	1.21888	1.24539	1.27573	1.3096	1.34685	1.38765	1.43058	1.47547	1.52119	1.56529	1.60507	1.63857	1.66161	1.66691	1.64804	1.60286	1.52675	1.41063
-0.168772	-0.133662	-0.0731803	-0.00894937	0.0430468	0.0819856	0.116521	0.15512	0.200779	0.252681	0.310421	0.37401	0.43869	0.495299	0.542714	0.578927	0.605752	0.628553	0.64971	0.66998	0.691267	0.716981	0.747201	0.777591	0.80386	0.825266	0.844516	0.864543	0.886794	0.911211	0.937874	0.967058	0.997909	1.02867	1.05755	1.08418	1.10918	1.13482	1.162	1.19137	1.22097	1.24966	1.27332	1.2881	1.28998	1.27676	1.24772	1.20163	1.13519	1.04493
-0.179838	-0.203681	-0.194004	-0.162485	-0.132293	-0.107947	-0.0864685	-0.0544603	-0.0120846	0.0333292	0.077412	0.118036	0.153279	0.181937	0.204155	0.221611	0.237484	0.253257	0.267553	0.280918	0.297036	0.318756	0.343973	0.372761	0.40321	0.440528	0.486604	0.539145	0.595532	0.656358	0.721814	0.790547	0.864102	0.940712	1.01922	1.09857	1.18225	1.26622	1.35015	1.43293	1.51239	1.58307	1.64476	1.69207	1.72153	1.72661	1.70716	1.66731	1.60174	1.49941
-0.208095	-0.238466	-0.248369	-0.23901	-0.214818	-0.176029	-0.120346	-0.0498729	0.0263891	0.0979541	0.158538	0.205004	0.235602	0.254539	0.272458	0.297701	0.331186	0.366474	0.397949	0.421373	0.435885	0.443316	0.447276	0.451044	0.456593	0.466353	0.483892	0.51077	0.544163	0.578324	0.608508	0.634535	0.658971	0.685438	0.71883	0.762485	0.816315	0.877099	0.938901	0.999148	1.05702	1.11225	1.16408	1.21338	1.25722	1.29395	1.32138	1.33616	1.33254	1.30141
-0.0863621	-0.100744	-0.0955496	-0.0706567	-0.0333281	0.00592372	0.0399953	0.0685944	0.0955204	0.125545	0.162436	0.205569	0.250274	0.292039	0.324159	0.342964	0.350842	0.353811	0.35724	0.364182	0.3761	0.391622	0.407253	0.419535	0.428035	0.436045	0.447377	0.464293	0.487607	0.519248	0.556996	0.599947	0.643327	0.685402	0.72703	0.769996	0.818746	0.871303	0.926679	0.983102	1.0385	1.09135	1.14078	1.18645	1.22759	1.26189	1.28593	1.29592	1.29052	1.26972
-0.150138	-0.170181	-0.163225	-0.139362	-0.120323	-0.118806	-0.127724	-0.128892	-0.110603	-0.0738124	-0.0249955	0.0275296	0.0761583	0.115415	0.14229	0.156874	0.16375	0.170178	0.180785	0.195215	0.211325	0.228479	0.246071	0.262273	0.277006	0.295195	0.323415	0.364147	0.414912	0.472113	0.533368	0.596363	0.659131	0.721589	0.785019	0.851696	0.924151	1.00302	1.08587	1.16817	1.24502	1.31319	1.37073	1.4163	1.44945	1.47071	1.47672	1.46299	1.42746	1.36911
-0.193924	-0.199176	-0.16844	-0.121125	-0.0818297	-0.0613729	-0.0500623	-0.0292388	0.0102611	0.0622935	0.116322	0.168955	0.219857	0.264115	0.294653	0.308537	0.309232	0.303485	0.299828	0.304311	0.316344	0.331333	0.345867	0.359588	0.372258	0.382538	0.390698	0.401607	0.421777	0.453038	0.490972	0.532618	0.578168	0.627594	0.679941	0.73461	0.79148	0.850672	0.913669	0.982908	1.05867	1.13731	1.21362	1.2829	1.34155	1.38464	1.40906	1.41714	1.41091	1.38317
-0.202212	-0.225165	-0.196892	-0.130187	-0.048989	0.0263841	0.0921258	0.154515	0.22088	0.281267	0.332543	0.376189	0.414065	0.448979	0.482961	0.514976	0.542569	0.565233	0.583979	0.598051	0.606219	0.61063	0.616163	0.625845	0.639374	0.656358	0.678093	0.7052	0.73548	0.765628	0.796022	0.829146	0.865825	0.90698	0.952113	1.00277	1.05433	1.10768	1.16261	1.21782	1.27189	1.32383	1.37285	1.4172	1.45255	1.47371	1.47945	1.47268	1.45071	1.40093
-0.137697	-0.117142	-0.0748787	-0.0388892	-0.0294717	-0.0450041	-0.0656599	-0.0741606	-0.0649629	-0.0374103	0.0072286	0.0636053	0.122063	0.173881	0.215131	0.24732	0.27464	0.300635	0.328965	0.363393	0.404235	0.445223	0.479523	0.50737	0.53469	0.568344	0.60973	0.655475	0.704404	0.754099	0.799602	0.838271	0.87154	0.904539	0.944849	0.99613	1.05579	1.11957	1.18267	1.23986	1.28763	1.32659	1.36237	1.40051	1.4401	1.4752	1.49826	1.50158	1.47975	1.42934
-0.15065	-0.177359	-0.174424	-0.151152	-0.126997	-0.110658	-0.0919347	-0.0564488	-0.00228179	0.0602121	0.12213	0.182481	0.242472	0.300476	0.35371	0.401507	0.445389	0.487573	0.528549	0.568181	0.606916	0.644495	0.677224	0.702571	0.721813	0.740746	0.764442	0.794218	0.827064	0.861842	0.896766	0.929979	0.962324	0.995516	1.03119	1.0723	1.12003	1.17354	1.23087	1.28992	1.34731	1.40102	1.44765	1.48592	1.51655	1.53647	1.54199	1.53143	1.50528	1.45784
-0.154291	-0.178897	-0.192181	-0.197767	-0.202535	-0.20932	-0.210567	-0.193648	-0.15209	-0.0903611	-0.0205895	0.0461931	0.102231	0.144777	0.174465	0.195619	0.215895	0.241881	0.27558	0.315122	0.356709	0.395907	0.43005	0.459435	0.488282	0.521954	0.563426	0.612801	0.667847	0.724435	0.778757	0.83018	0.879827	0.930634	0.985114	1.0441	1.10538	1.16567	1.22113	1.27062	1.31327	1.35041	1.38253	1.4099	1.42828	1.4313	1.41523	1.37806	1.31917	1.23504
-0.18234	-0.170308	-0.153036	-0.156176	-0.183858	-0.21081	-0.204912	-0.155102	-0.0717974	0.02536	0.117055	0.183853	0.21319	0.212643	0.207697	0.224977	0.271033	0.333469	0.394929	0.440767	0.46429	0.469568	0.471593	0.487442	0.525148	0.581995	0.649779	0.715142	0.764973	0.795926	0.816521	0.845012	0.89499	0.966147	1.04849	1.1276	1.19358	1.24431	1.28548	1.32753	1.37782	1.43742	1.50216	1.56322	1.60939	1.63268	1.62817	1.59944	1.556	1.49995
-0.139688	-0.133335	-0.122101	-0.118138	-0.115987	-0.103089	-0.0700739	-0.0173649	0.0493851	0.127193	0.21353	0.299618	0.373097	0.424407	0.451386	0.459205	0.459266	0.461608	0.46958	0.484044	0.50211	0.518697	0.530549	0.538305	0.545994	0.557052	0.572511	0.592045	0.619095	0.653369	0.690661	0.729326	0.769579	0.814563	0.868141	0.930168	0.997028	1.06725	1.13907	1.21102	1.28205	1.35068	1.41783	1.48386	1.54518	1.59565	1.63456	1.67381	1.72581	1.78029
-0.209991	-0.223439	-0.185302	-0.122914	-0.0760775	-0.0592397	-0.0501816	-0.0200739	0.0348295	0.102878	0.174316	0.249845	0.328416	0.401665	0.455584	0.488984	0.510275	0.52822	0.546101	0.562783	0.580099	0.603056	0.629683	0.651706	0.666474	0.679057	0.696192	0.720088	0.748068	0.781136	0.822444	0.870974	0.921885	0.970469	1.01529	1.06066	1.11301	1.17437	1.24127	1.30907	1.37392	1.43227	1.48101	1.5179	1.54199	1.54852	1.53209	1.49508	1.439	1.35488
-0.152971	-0.132035	-0.0881911	-0.0476905	-0.0269889	-0.0215091	-0.0136784	0.008286	0.0432124	0.0853065	0.132959	0.187519	0.243043	0.290066	0.324347	0.347014	0.362344	0.376826	0.39567	0.418876	0.444671	0.472962	0.502159	0.528453	0.551307	0.575049	0.606067	0.646779	0.693235	0.741005	0.791137	0.844624	0.898384	0.950519	1.00269	1.05749	1.11782	1.18499	1.25624	1.3267	1.39149	1.44678	1.49272	1.52486	1.54139	1.54038	1.52195	1.48747	1.43304	1.34912
-0.165032	-0.159288	-0.113008	-0.0634927	-0.0383939	-0.0313141	-0.0168162	0.015275	0.0556761	0.0952346	0.130891	0.161373	0.187511	0.209732	0.225405	0.235282	0.245111	0.255883	0.265029	0.276429	0.294428	0.313151	0.326925	0.341008	0.364389	0.398747	0.43729	0.477727	0.523765	0.576419	0.635326	0.700977	0.770681	0.842957	0.92104	1.0054	1.0927	1.17975	1.26331	1.34008	1.40802	1.46836	1.52286	1.56639	1.59473	1.59763	1.57969	1.54371	1.48365	1.39023
-0.0834037	-0.0555906	-0.0192232	-0.00291715	-0.0190906	-0.0535385	-0.0793564	-0.0798363	-0.0515966	0.00395246	0.0726852	0.134729	0.17277	0.186317	0.189446	0.202185	0.235603	0.285646	0.34271	0.391916	0.422038	0.43296	0.437416	0.451454	0.482204	0.526853	0.582023	0.635999	0.678225	0.705682	0.724927	0.749093	0.788364	0.843086	0.90644	0.969549	1.02498	1.07155	1.11205	1.15701	1.21276	1.27848	1.34812	1.41213	1.46126	1.48944	1.49547	1.48557	1.46901	1.44395
[truncated: 11 more columns]
