# Supplementary material for: Comparison of sagittal plane gait characteristics between the overground and treadmill approach for gait analysis in typically developing children
Source: PeerJ. 2022 Jul 22;10:e13752. doi: 10.7717/peerj.13752 (PMC9310770; doi:10.7717/peerj.13752)
Supplement: Supplemental Information 7 — Each colum represents a percentage of the gait cycle (0–100%). Every raw represents data of one child.Sheet 1 data of the overground approachSheet 2 data of the treadmill approach [file peerj-10-13752-s007.xlsx]

## Sheet: 1
0.550821	0.783231	0.923061	0.866084	0.927413	0.993068	1.11706	1.24603	1.35204	1.41906	1.46739	1.48649	1.46967	1.42062	1.34656	1.25981	1.17155	1.08959	1.01599	0.953066	0.900912	0.859711	0.827444	0.802688	0.782822	0.763923	0.749771	0.737121	0.727585	0.719503	0.715044	0.713533	0.717454	0.726152	0.738716	0.754583	0.771651	0.790694	0.807582	0.825003	0.84119	0.855556	0.8659	0.871078	0.870012	0.859243	0.838464	0.807256	0.763525	0.704862
0.188061	0.405007	0.596743	0.740168	0.869428	0.881511	0.908994	0.969989	1.01677	1.08859	1.11844	1.15791	1.17601	1.17857	1.17443	1.15708	1.12627	1.08331	1.03177	0.972823	0.914262	0.85946	0.811477	0.771963	0.742043	0.720247	0.705516	0.697631	0.697331	0.702114	0.708952	0.719698	0.732135	0.746816	0.764563	0.784354	0.809672	0.835834	0.862663	0.891598	0.9207	0.949138	0.97267	0.993486	1.00686	1.0123	1.00801	0.992291	0.965985	0.929286
0.768985	0.792887	0.867107	0.849836	0.797434	0.794855	0.883911	1.02611	1.12613	1.18437	1.23776	1.26733	1.2525	1.20174	1.13743	1.07116	1.00835	0.950255	0.895972	0.842496	0.791825	0.745404	0.705189	0.671789	0.646404	0.628847	0.619665	0.615805	0.619244	0.63185	0.651964	0.67976	0.716411	0.757504	0.804663	0.854497	0.903191	0.948771	0.990704	1.03033	1.0663	1.0986	1.12402	1.13965	1.144	1.13844	1.12099	1.09201	1.04994	0.993932
0.681932	0.830574	0.990167	1.04168	1.10779	1.25342	1.26339	1.36056	1.43696	1.46824	1.4731	1.44929	1.40426	1.34451	1.2747	1.18842	1.0908	0.994523	0.911825	0.837828	0.777124	0.730044	0.699887	0.684483	0.676558	0.678329	0.689067	0.705792	0.727991	0.755422	0.785579	0.816102	0.846709	0.874201	0.897676	0.917174	0.930929	0.940554	0.947429	0.950221	0.948914	0.949017	0.941456	0.934292	0.922342	0.906545	0.887307	0.863918	0.835411	0.799981
0.619869	0.665029	0.686676	0.722044	0.753284	0.739219	0.765802	0.832738	0.888728	0.943522	0.9814	1.01683	1.04426	1.06259	1.06679	1.05901	1.04485	1.01979	0.980568	0.938558	0.898327	0.861091	0.829219	0.807287	0.793298	0.788113	0.790605	0.792633	0.797945	0.802929	0.811127	0.822335	0.835706	0.853855	0.872505	0.894317	0.915759	0.935871	0.954633	0.97337	0.991927	1.01085	1.02914	1.04375	1.05411	1.05893	1.07426	1.07952	1.02543	0.992637
0.0436024	0.0800488	0.429763	0.747679	0.859181	0.859579	0.867814	0.921866	0.93979	0.96263	1.03197	1.09745	1.15804	1.20513	1.24178	1.25792	1.24742	1.21148	1.15919	1.10088	1.03909	0.979974	0.926026	0.88049	0.842402	0.810323	0.786936	0.768357	0.755367	0.744282	0.737756	0.735094	0.735721	0.740358	0.746728	0.755014	0.766374	0.781435	0.797821	0.816695	0.839137	0.860554	0.884672	0.910894	0.936713	0.961001	0.980533	0.992107	0.994523	0.986015
0.550302	0.644271	0.674234	0.689448	0.711309	0.74687	0.813766	0.864134	0.911806	0.950772	0.970085	0.973871	0.968537	0.953991	0.929367	0.895137	0.85302	0.810534	0.770706	0.738331	0.713867	0.696583	0.686797	0.683937	0.686296	0.693428	0.703419	0.716392	0.731275	0.748528	0.767693	0.789937	0.812563	0.836748	0.859007	0.879838	0.898657	0.915218	0.930523	0.943867	0.954874	0.963045	0.965146	0.960877	0.949537	0.930054	0.905825	0.897884	0.882051	0.825351
0.320373	0.442006	0.521279	0.598689	0.644406	0.684506	0.713087	0.743114	0.776501	0.80735	0.84066	0.865284	0.903812	0.925873	0.945597	0.957484	0.961018	0.959718	0.95143	0.937364	0.919666	0.90242	0.889319	0.881148	0.875416	0.875212	0.876905	0.880944	0.886614	0.897695	0.907991	0.921258	0.933517	0.947914	0.962638	0.9788	0.993319	1.00837	1.02221	1.03451	1.04152	1.0457	1.04718	1.04371	1.03385	1.02213	1.0078	0.995935	0.976834	0.951189
0.659825	0.943174	0.98581	1.02075	1.06615	1.08759	1.20503	1.2641	1.35383	1.42937	1.4661	1.4898	1.48169	1.44848	1.38617	1.30177	1.19848	1.08411	0.966545	0.854627	0.760859	0.668231	0.584715	0.531234	0.502773	0.491908	0.490788	0.501609	0.51916	0.546034	0.580109	0.619903	0.663851	0.712256	0.764188	0.815888	0.866025	0.91295	0.954034	0.989981	1.01916	1.04072	1.05148	1.05121	1.03898	1.01406	0.977971	0.932927	0.873425	0.804003
0.462394	0.698814	0.782632	0.787303	0.790316	0.839733	0.924745	0.990117	1.07291	1.12799	1.16808	1.194	1.20226	1.1972	1.17732	1.1417	1.09195	1.03726	0.979508	0.924477	0.878527	0.844284	0.821186	0.807614	0.804361	0.806799	0.812911	0.823507	0.834519	0.846031	0.857487	0.870605	0.883928	0.899602	0.914461	0.930095	0.945931	0.960626	0.976049	0.993987	1.01137	1.0264	1.03951	1.04833	1.04934	1.0428	1.02652	0.998442	0.958798	0.917974
0.497902	0.744642	0.806456	0.986916	1.02705	1.05137	1.09108	1.1513	1.17222	1.18545	1.18395	1.17683	1.15641	1.11963	1.07642	1.01869	0.940377	0.870392	0.815615	0.772235	0.743386	0.727417	0.715504	0.7142	0.716172	0.720658	0.728398	0.734048	0.742212	0.752794	0.76579	0.776427	0.791279	0.806398	0.820037	0.833785	0.846473	0.856066	0.8694	0.878151	0.890353	0.897883	0.901991	0.902417	0.90099	0.893992	0.875885	0.848655	0.807244	0.751668
0.713234	0.915388	1.12218	1.12827	1.05733	1.05501	1.07853	1.11255	1.14998	1.17854	1.21492	1.22293	1.21009	1.18795	1.14109	1.07705	1.00369	0.926278	0.850305	0.78467	0.730123	0.686772	0.654277	0.633437	0.621243	0.618073	0.623373	0.635245	0.652408	0.672408	0.696035	0.723029	0.752622	0.785554	0.819292	0.852683	0.885683	0.914878	0.941067	0.963797	0.982903	0.997909	1.00793	1.00954	1.00422	0.990451	0.966321	0.9317	0.888263	0.832509
0.537533	0.819861	0.900329	0.873395	0.989296	1.14325	1.29525	1.44934	1.5725	1.65335	1.68281	1.6739	1.63063	1.55189	1.45597	1.35297	1.25172	1.15883	1.07545	1.00283	0.941623	0.890377	0.849382	0.816156	0.790216	0.769623	0.755428	0.74649	0.742322	0.743889	0.752246	0.764202	0.781231	0.802754	0.829639	0.861415	0.89895	0.940522	0.983321	1.02669	1.06838	1.11037	1.15159	1.18884	1.22087	1.24533	1.25428	1.24896	1.22531	1.18308
0.646604	0.743558	0.739951	0.821291	0.919681	0.964312	1.07309	1.16567	1.22365	1.25813	1.27449	1.2567	1.22098	1.16487	1.10233	1.03051	0.950727	0.868546	0.788335	0.717248	0.660219	0.614386	0.579751	0.556813	0.543718	0.539761	0.543716	0.555519	0.573907	0.598562	0.628448	0.662761	0.703246	0.74742	0.792888	0.840381	0.889651	0.937721	0.985387	1.02914	1.06812	1.1045	1.13462	1.15731	1.16878	1.17101	1.15921	1.13769	1.10086	1.04752
0.666417	0.62364	0.752554	0.663143	0.696652	0.792425	0.937341	1.03533	1.11104	1.187	1.22992	1.24741	1.24732	1.23126	1.20165	1.16411	1.11927	1.06948	1.01765	0.964948	0.915003	0.870158	0.831182	0.797921	0.769306	0.746544	0.728754	0.716197	0.708348	0.705576	0.7104	0.721372	0.735611	0.753961	0.774811	0.798703	0.823783	0.849914	0.876821	0.902661	0.928461	0.952301	0.97453	0.991435	1.00355	1.00681	1.00077	0.983751	0.95533	0.914183
0.735827	0.826521	0.837735	0.872318	0.906943	0.962931	1.03866	1.11629	1.17365	1.20955	1.23072	1.23207	1.22357	1.19768	1.15756	1.10669	1.04454	0.977309	0.909394	0.846959	0.789637	0.739791	0.695921	0.664462	0.642026	0.628266	0.623959	0.627293	0.636708	0.652646	0.673723	0.700536	0.729508	0.762771	0.800248	0.840449	0.882955	0.92927	0.974244	1.01655	1.05308	1.08094	1.0979	1.10181	1.09196	1.06828	1.02938	0.973614	0.90451	0.811826
0.53364	0.621867	0.711256	0.709139	0.788532	0.902346	1.00383	1.11352	1.19567	1.24463	1.27477	1.28479	1.27921	1.25898	1.22364	1.1723	1.10979	1.04017	0.971242	0.906109	0.848167	0.797433	0.754142	0.719554	0.693437	0.671894	0.658711	0.65103	0.646459	0.648424	0.655483	0.668391	0.685147	0.706234	0.732836	0.76265	0.795052	0.830055	0.868763	0.912596	0.959435	1.00767	1.05227	1.0925	1.12315	1.14113	1.14536	1.13289	1.111	1.0609
0.28692	0.554133	0.699453	0.968431	0.928032	0.962253	1.02009	1.07678	1.18586	1.2941	1.2991	1.30884	1.30337	1.27657	1.2356	1.17793	1.114	1.04583	0.974974	0.9057	0.843223	0.790079	0.748885	0.720058	0.701863	0.693664	0.690257	0.692231	0.699836	0.710836	0.729366	0.750441	0.776221	0.803406	0.832503	0.862782	0.894557	0.925722	0.956165	0.987379	1.01529	1.04025	1.06006	1.07197	1.07615	1.06966	1.04883	1.01502	0.967316	0.903071
0.984468	1.00905	1.00684	0.908408	0.936195	1.02544	1.11283	1.18077	1.25688	1.32033	1.36072	1.3771	1.36604	1.32468	1.2502	1.15757	1.05893	0.963713	0.88013	0.805983	0.742204	0.691714	0.653338	0.627258	0.611314	0.602334	0.599236	0.601297	0.608851	0.621932	0.641387	0.667062	0.698072	0.733752	0.773975	0.817749	0.862874	0.907723	0.952436	0.993792	1.03284	1.06586	1.0921	1.10924	1.11406	1.10391	1.07974	1.03809	0.977867	0.896654
0.711198	0.732608	0.908556	0.886716	0.898781	0.966811	1.06405	1.14092	1.20879	1.25473	1.27044	1.25975	1.22612	1.17409	1.11592	1.05375	0.990136	0.932143	0.881947	0.840266	0.809386	0.786349	0.771856	0.7627	0.758652	0.75758	0.761389	0.773112	0.787586	0.806105	0.828279	0.851984	0.877174	0.901353	0.923944	0.946834	0.970261	0.994352	1.01826	1.04029	1.06258	1.0815	1.09624	1.10316	1.09995	1.08477	1.05908	1.0206	0.965715	0.894168
0.688227	0.749643	0.936228	0.891528	0.954407	1.06372	1.15551	1.23003	1.29342	1.3295	1.34734	1.34976	1.32075	1.27063	1.19843	1.11066	1.01866	0.928121	0.842874	0.766461	0.700318	0.645309	0.601639	0.569225	0.546218	0.53226	0.527504	0.531999	0.543958	0.563639	0.587283	0.616433	0.651437	0.692052	0.738821	0.788718	0.842755	0.897052	0.950572	1.00022	1.04356	1.07991	1.10531	1.11921	1.11834	1.09915	1.06369	1.01266	0.945233	0.860729
0.47769	0.574603	0.663377	0.694558	0.75032	0.832914	0.921227	1.00336	1.08002	1.14468	1.1995	1.22462	1.23159	1.2244	1.20226	1.16674	1.12098	1.06933	1.01334	0.957895	0.907409	0.860298	0.819905	0.786429	0.762026	0.74282	0.730684	0.724334	0.721267	0.721067	0.726538	0.736026	0.750786	0.772069	0.797112	0.824039	0.854879	0.885742	0.918742	0.952166	0.984527	1.01288	1.03729	1.05305	1.05896	1.05196	1.03148	0.994526	0.937869	0.864188
0.401969	0.50332	0.533922	0.564014	0.602772	0.671133	0.748099	0.836743	0.923681	0.983994	1.03314	1.068	1.09046	1.0998	1.09571	1.07922	1.05251	1.01846	0.981343	0.946677	0.915723	0.888466	0.865393	0.845215	0.827482	0.811334	0.798013	0.78772	0.781108	0.778947	0.780909	0.786071	0.794117	0.804825	0.816724	0.830495	0.845954	0.861802	0.880391	0.902009	0.928616	0.961024	0.9963	1.03032	1.06143	1.08562	1.09916	1.09856	1.0836	1.05244
0.6654	0.787055	0.765818	0.715096	0.732104	0.756174	0.816108	0.928621	1.03783	1.11725	1.18786	1.23549	1.25023	1.22977	1.18525	1.12966	1.07207	1.01473	0.960377	0.911164	0.871154	0.840242	0.817354	0.801462	0.791372	0.784043	0.778948	0.774529	0.772252	0.773013	0.777102	0.78487	0.796105	0.809988	0.826888	0.84665	0.868567	0.893339	0.919487	0.947616	0.976855	1.00703	1.03703	1.06426	1.08628	1.09893	1.10205	1.09348	1.07188	1.038
0.34619	0.593326	0.575829	0.651756	0.653259	0.71683	0.799369	0.868227	0.953007	1.03869	1.0999	1.14412	1.16968	1.17902	1.17834	1.16104	1.13173	1.09465	1.05218	1.00598	0.959848	0.915856	0.874941	0.838796	0.806803	0.781498	0.761574	0.749624	0.741821	0.738616	0.739238	0.744392	0.755822	0.772245	0.79076	0.813621	0.839424	0.866165	0.894481	0.926056	0.958235	0.989381	1.01922	1.04346	1.06097	1.0727	1.07467	1.06809	1.05122	1.02392
0.506298	0.604296	0.757331	0.761329	0.80703	0.896242	0.970581	1.06507	1.15181	1.20702	1.22976	1.23395	1.21837	1.1878	1.14397	1.08868	1.02356	0.954609	0.888598	0.827886	0.778303	0.739371	0.713207	0.698058	0.694286	0.698182	0.710289	0.727754	0.750725	0.779281	0.809487	0.840756	0.873071	0.905928	0.939312	0.972853	1.00516	1.03626	1.06745	1.09713	1.12459	1.15031	1.17171	1.18708	1.19287	1.18728	1.17001	1.14192	1.11345	1.04647
0.30419	0.755418	0.748714	0.761093	0.805127	0.921746	1.0482	1.13716	1.24147	1.25586	1.27534	1.2668	1.22995	1.17067	1.0944	1.01018	0.924497	0.841838	0.76326	0.691512	0.629682	0.57721	0.5386	0.512218	0.496572	0.489774	0.490679	0.498614	0.513007	0.532577	0.559101	0.594289	0.639877	0.696667	0.759433	0.826784	0.895795	0.96676	1.04035	1.11106	1.17746	1.23267	1.27304	1.29775	1.30489	1.29432	1.26439	1.21284	1.13825	1.03738
0.417687	0.640714	0.688896	0.736048	0.780726	0.805423	0.86197	0.935125	1.00018	1.0619	1.1056	1.12779	1.12732	1.10557	1.06789	1.02199	0.972162	0.924063	0.880848	0.843116	0.809591	0.782276	0.761784	0.746844	0.737362	0.733219	0.733676	0.740302	0.751404	0.765302	0.782868	0.800895	0.821032	0.844543	0.869787	0.89662	0.924462	0.952864	0.981697	1.01129	1.03914	1.06237	1.07832	1.0847	1.0799	1.0638	1.03725	0.998005	0.943723	0.871134
0.57248	0.726129	0.672761	0.712396	0.750636	0.858016	0.881041	0.92639	0.98817	1.03744	1.07853	1.09983	1.11274	1.10876	1.09012	1.05635	1.00902	0.950507	0.891939	0.83768	0.790612	0.751637	0.724114	0.704299	0.692769	0.686052	0.684126	0.685198	0.688211	0.695352	0.706458	0.720306	0.740657	0.764307	0.792093	0.825427	0.86322	0.905173	0.949054	0.994932	1.04034	1.08494	1.12689	1.16237	1.18982	1.20499	1.20761	1.19546	1.16432	1.11966
0.423671	0.759082	0.847071	0.941897	0.91934	0.869218	0.881617	0.985967	1.07861	1.12257	1.16703	1.20562	1.21558	1.20666	1.19252	1.15997	1.12435	1.08611	1.04591	1.00928	0.975646	0.947401	0.92493	0.907218	0.893626	0.881615	0.870883	0.863612	0.861386	0.863039	0.869421	0.879118	0.89125	0.905919	0.919887	0.936441	0.956676	0.982519	1.01323	1.04844	1.08713	1.12879	1.16998	1.20884	1.24168	1.26468	1.2773	1.27576	1.25955	1.22796
0.458373	0.555132	0.646389	0.654558	0.686034	0.747354	0.818961	0.878513	0.929625	0.972985	0.997953	1.02345	1.03588	1.03358	1.01664	0.99091	0.961391	0.931544	0.904687	0.881599	0.864528	0.851997	0.844234	0.840524	0.837875	0.83699	0.838639	0.842418	0.847588	0.854773	0.864043	0.873516	0.883931	0.895125	0.90702	0.920337	0.934011	0.949593	0.966862	0.986016	1.00694	1.02818	1.04943	1.06847	1.08298	1.09141	1.09271	1.08638	1.07113	1.04608
0.302709	0.534415	0.785571	0.802228	0.89697	1.01288	1.08171	1.15077	1.23476	1.27901	1.30786	1.31155	1.2923	1.25665	1.2078	1.14787	1.08054	1.01114	0.944483	0.884575	0.829564	0.781664	0.740904	0.708612	0.68129	0.661711	0.646576	0.636945	0.631219	0.629387	0.63386	0.64496	0.663993	0.689028	0.717439	0.750952	0.790415	0.834432	0.880551	0.926989	0.972912	1.01499	1.05337	1.08419	1.10351	1.10904	1.09795	1.07092	1.02558	0.963274
0.751422	0.773671	0.754904	0.683102	0.727003	0.910022	1.06233	1.11016	1.23149	1.29542	1.34246	1.36073	1.35252	1.32086	1.26215	1.19064	1.11168	1.02918	0.946919	0.869976	0.799598	0.737753	0.686519	0.647387	0.617981	0.597153	0.583538	0.575489	0.573805	0.576532	0.585162	0.598856	0.618459	0.644563	0.679525	0.722958	0.773462	0.830423	0.891678	0.955513	1.01886	1.08014	1.13662	1.18294	1.21334	1.22484	1.21176	1.17969	1.12391	1.04936
0.523833	0.690674	0.67473	0.716171	0.785828	0.870227	0.974266	1.04027	1.09518	1.12319	1.12371	1.12372	1.11511	1.09145	1.06797	1.03622	1.00135	0.962948	0.924584	0.887377	0.855936	0.829083	0.807863	0.792962	0.782001	0.774761	0.767857	0.762941	0.762987	0.766655	0.773252	0.783895	0.796996	0.813689	0.831552	0.852581	0.876859	0.904978	0.936039	0.967432	0.999778	1.03026	1.05743	1.07814	1.09172	1.09427	1.08455	1.06272	1.02351	0.96024
0.613659	0.60684	0.590912	0.670296	0.714459	0.855987	0.981035	1.12058	1.21381	1.27611	1.31872	1.32755	1.31487	1.28303	1.23658	1.18528	1.12884	1.06823	1.00746	0.949053	0.893886	0.842892	0.797478	0.757278	0.723564	0.696446	0.675798	0.662704	0.656078	0.656112	0.661151	0.672967	0.690742	0.714733	0.743356	0.776664	0.812681	0.852306	0.891983	0.931764	0.970563	1.0085	1.04423	1.07614	1.10098	1.11545	1.11627	1.0994	1.06144	1.00199
0.401625	0.570584	0.62351	0.660147	0.670483	0.694313	0.761773	0.885859	0.964645	1.037	1.07417	1.08838	1.08267	1.06009	1.02451	0.981018	0.936144	0.894834	0.860712	0.834546	0.817878	0.809412	0.804372	0.801604	0.79953	0.79867	0.799641	0.802151	0.806899	0.813512	0.821731	0.831463	0.843144	0.856164	0.87246	0.893377	0.920228	0.953458	0.991596	1.03203	1.07432	1.11495	1.15118	1.17978	1.19815	1.2047	1.19753	1.1759	1.13786	1.08076
0.706825	0.750802	0.774635	0.755328	0.759503	0.862712	0.99778	1.06947	1.1303	1.17216	1.19302	1.19096	1.16962	1.13281	1.08856	1.03874	0.987778	0.940618	0.900828	0.86817	0.839837	0.818034	0.800782	0.787323	0.778389	0.773345	0.772274	0.773472	0.778447	0.784934	0.793492	0.803478	0.814357	0.827697	0.842043	0.857228	0.872862	0.889895	0.908875	0.931307	0.957337	0.986731	1.01407	1.03946	1.05789	1.06578	1.05805	1.03058	0.985116	0.915588
0.499347	0.68335	0.704183	0.736709	0.75175	0.7819	0.831243	0.914161	0.997146	1.06455	1.09919	1.1059	1.09895	1.07584	1.04646	1.01768	0.989033	0.958771	0.925242	0.88962	0.853971	0.82028	0.793407	0.771962	0.757644	0.748342	0.743885	0.745263	0.751616	0.762375	0.777225	0.795432	0.815829	0.837595	0.861033	0.886643	0.914965	0.94547	0.980192	1.01885	1.05989	1.10097	1.13693	1.16405	1.17946	1.18077	1.17004	1.14647	1.1093	1.05947
0.530087	0.607241	0.661962	0.742425	0.781345	0.892536	1.01445	1.10202	1.15644	1.1778	1.16811	1.14111	1.10351	1.05894	1.01378	0.971365	0.936251	0.910129	0.889163	0.872147	0.858724	0.848629	0.842249	0.838827	0.837903	0.835005	0.831823	0.827403	0.821891	0.817386	0.812614	0.810623	0.811481	0.816928	0.828631	0.848286	0.8738	0.90541	0.940735	0.97682	1.01105	1.04442	1.07675	1.10704	1.13192	1.1462	1.14476	1.12388	1.08737	1.03637
0.240878	0.707107	0.709022	0.762684	0.777921	0.818734	0.880116	0.962605	1.01855	1.03111	1.06559	1.08695	1.10401	1.10425	1.08601	1.05464	1.02165	0.994136	0.970356	0.951925	0.93629	0.922455	0.907872	0.89449	0.881082	0.867967	0.85441	0.841327	0.828857	0.817096	0.806506	0.7985	0.794209	0.792751	0.795693	0.803398	0.816157	0.833547	0.856241	0.882111	0.911224	0.943493	0.977077	1.00973	1.03945	1.06223	1.07451	1.07354	1.05232	1.00615
0.420407	0.693785	0.67819	0.732474	0.766144	0.80578	0.876824	0.940883	0.992957	1.0388	1.06708	1.07226	1.06391	1.04714	1.02096	0.986621	0.94645	0.907403	0.875218	0.850856	0.834222	0.824319	0.818115	0.814952	0.814046	0.813922	0.815409	0.819293	0.823231	0.828177	0.83499	0.842233	0.852131	0.864157	0.877178	0.891815	0.908355	0.926728	0.946938	0.969474	0.993435	1.01818	1.04184	1.06361	1.07993	1.08874	1.08633	1.06922	1.03731	0.986253
0.448809	0.576421	0.586067	0.618677	0.658955	0.712627	0.770733	0.856445	0.932861	0.984605	1.03094	1.06118	1.07523	1.07419	1.06318	1.04336	1.01637	0.983929	0.947984	0.911041	0.877015	0.846826	0.822324	0.805282	0.792215	0.783966	0.777013	0.770686	0.767687	0.768492	0.772268	0.778259	0.786358	0.797441	0.813517	0.836252	0.863846	0.897072	0.933841	0.972435	1.01102	1.0472	1.07763	1.10251	1.11802	1.12322	1.11594	1.09539	1.06198	1.016
0.295125	0.442779	0.53699	0.54908	0.572945	0.620921	0.707684	0.794848	0.86062	0.923691	0.963142	0.986478	1.00063	1.00458	0.995689	0.972277	0.940402	0.906558	0.875567	0.848931	0.827543	0.809628	0.793406	0.77805	0.765398	0.752925	0.741041	0.729319	0.721068	0.716119	0.715924	0.719971	0.731082	0.748854	0.775321	0.810195	0.84835	0.890928	0.93936	0.99427	1.05169	1.10533	1.15682	1.19954	1.23178	1.25222	1.25793	1.24652	1.21668	1.16951
0.348209	0.459989	0.532434	0.602181	0.692072	0.733123	0.771223	0.825599	0.881409	0.930206	0.963229	0.987861	1.00711	1.02078	1.02835	1.0249	1.00867	0.982467	0.947084	0.908216	0.872379	0.841312	0.816336	0.797852	0.785242	0.778566	0.777081	0.779487	0.782879	0.785651	0.786106	0.786421	0.787801	0.791952	0.799477	0.809539	0.822334	0.839055	0.860114	0.884453	0.90974	0.935106	0.957653	0.97635	0.989948	0.998446	0.999954	0.99547	0.983502	0.962483
0.480894	0.52424	0.683418	0.687282	0.710805	0.740531	0.784838	0.85588	0.916969	0.971093	1.02398	1.05783	1.08106	1.0932	1.08393	1.05909	1.0203	0.978263	0.937522	0.901809	0.869159	0.842643	0.822917	0.810197	0.801319	0.793681	0.786382	0.780878	0.778345	0.779235	0.783096	0.790911	0.803418	0.819422	0.839992	0.864629	0.892472	0.923273	0.955659	0.989204	1.02199	1.053	1.0782	1.09623	1.10375	1.09972	1.08198	1.04989	1.00075	0.928503
0.632605	0.642394	0.621984	0.603479	0.616097	0.654071	0.790619	0.9063	0.982012	1.07026	1.1283	1.15443	1.14906	1.12637	1.09361	1.05106	1.00021	0.948085	0.895425	0.844232	0.79683	0.757224	0.726458	0.706611	0.693699	0.684963	0.676732	0.668734	0.66154	0.659592	0.663998	0.675029	0.692972	0.715773	0.742923	0.772631	0.8057	0.841458	0.882344	0.927081	0.975548	1.02414	1.06917	1.10704	1.13625	1.15561	1.16395	1.15991	1.14164	1.10857
0.489091	0.780777	0.792601	0.869259	0.87033	0.939432	1.0333	1.09544	1.15862	1.19078	1.20668	1.2138	1.21143	1.19436	1.16295	1.12261	1.07631	1.02772	0.978893	0.932714	0.89075	0.851916	0.81559	0.78474	0.760523	0.742241	0.729236	0.719963	0.71314	0.709897	0.708734	0.711499	0.718254	0.72791	0.741063	0.757181	0.775434	0.795953	0.820219	0.847141	0.876294	0.906821	0.93595	0.959908	0.977579	0.985891	0.981493	0.965301	0.935544	0.889462
0.224653	0.419132	0.561515	0.627542	0.680407	0.706861	0.712703	0.757908	0.814884	0.874229	0.930442	0.966954	1.00115	1.02657	1.03902	1.04206	1.03465	1.0129	0.980939	0.943228	0.906279	0.876048	0.850576	0.831636	0.818552	0.809481	0.803724	0.801068	0.80183	0.809089	0.819409	0.833066	0.849587	0.86683	0.885456	0.905881	0.927045	0.948902	0.969147	0.991873	1.01439	1.03797	1.05848	1.07721	1.09292	1.10503	1.10991	1.10399	1.08589	1.04925
0.295466	0.537286	0.60325	0.672531	0.730322	0.760872	0.8454	0.913705	0.960314	1.0209	1.0553	1.07927	1.09307	1.0904	1.07546	1.0525	1.0233	0.990284	0.957619	0.923489	0.889597	0.856934	0.828221	0.803179	0.782021	0.76434	0.750546	0.74142	0.737298	0.73782	0.74312	0.752217	0.765682	0.782049	0.801868	0.824014	0.848616	0.875645	0.904981	0.936369	0.968992	1.00111	1.03089	1.05444	1.06913	1.07448	1.06967	1.05422	1.02785	0.989486
0.121528	0.348288	0.410907	0.502773	0.532367	0.567137	0.650362	0.750079	0.841987	0.946874	1.03237	1.08581	1.11656	1.12446	1.10996	1.08111	1.04579	1.00749	0.969509	0.934155	0.9018	0.872302	0.846978	0.825314	0.807905	0.795289	0.786612	0.782684	0.782343	0.785449	0.791659	0.801181	0.814143	0.829338	0.847047	0.865593	0.884913	0.9052	0.926383	0.949407	0.974152	1.00098	1.02453	1.04339	1.05626	1.06089	1.05656	1.04204	1.0159	0.978983
0.287125	0.368011	0.368755	0.447833	0.489056	0.553465	0.645079	0.737019	0.803947	0.890624	0.955888	1.00325	1.04023	1.05364	1.05214	1.03886	1.01619	0.985648	0.95537	0.927563	0.902942	0.881675	0.864669	0.851923	0.841939	0.833097	0.824287	0.817706	0.813312	0.812542	0.81429	0.819431	0.827893	0.839986	0.854587	0.869654	0.88413	0.899374	0.920059	0.943656	0.97025	1.0011	1.03341	1.0661	1.09525	1.1156	1.12354	1.11893	1.10038	1.06818
0.217139	0.505164	0.532688	0.636267	0.664954	0.758916	0.808639	0.886262	0.962595	1.04596	1.11267	1.14992	1.17303	1.18012	1.16643	1.13529	1.0915	1.04125	0.990258	0.938257	0.887304	0.838735	0.791297	0.747103	0.707865	0.675969	0.651771	0.634922	0.626226	0.624252	0.628064	0.637398	0.651908	0.670864	0.695566	0.725461	0.759639	0.799291	0.84249	0.887645	0.933251	0.978556	1.02144	1.0605	1.09398	1.12061	1.13819	1.14316	1.1359	1.11379
0.628014	0.64448	0.728029	0.720792	0.728196	0.736378	0.80402	0.90345	0.980851	1.02419	1.07028	1.08752	1.07879	1.04863	1.00777	0.959323	0.910655	0.865327	0.824158	0.78972	0.762532	0.744048	0.734109	0.728683	0.725809	0.725983	0.72858	0.73266	0.739548	0.749652	0.762499	0.778185	0.796426	0.820035	0.848358	0.881083	0.919076	0.961652	1.00619	1.05287	1.09964	1.14185	1.17552	1.1973	1.20464	1.19594	1.16901	1.12388	1.06177	0.981539
0.260606	0.702157	0.667528	0.708544	0.700673	0.712919	0.769262	0.843393	0.941531	1.01338	1.0814	1.11368	1.12874	1.12517	1.10404	1.07209	1.03496	0.9984	0.962492	0.928302	0.897201	0.867767	0.838697	0.81119	0.785935	0.764954	0.750097	0.743049	0.742511	0.748158	0.758786	0.772929	0.790202	0.811527	0.835113	0.862274	0.894326	0.931866	0.970896	1.0116	1.0502	1.08494	1.11363	1.13689	1.1523	1.15752	1.15205	1.13234	1.09743	1.04581
0.640311	0.751944	0.725182	0.747891	0.781167	0.830416	0.904793	0.974517	1.02172	1.05371	1.08081	1.09517	1.09752	1.08818	1.06495	1.0302	0.989958	0.945432	0.898861	0.856661	0.824744	0.801911	0.786211	0.773825	0.763346	0.75322	0.745039	0.741531	0.743358	0.751478	0.763388	0.777504	0.794613	0.814731	0.838648	0.866572	0.895721	0.928053	0.962369	0.999259	1.03585	1.07049	1.10182	1.12743	1.14524	1.15244	1.14634	1.12546	1.08927	1.03818
0.391812	0.489845	0.539794	0.543699	0.528332	0.543571	0.601428	0.667038	0.736569	0.81042	0.880518	0.93742	0.975963	1.00236	1.01853	1.02404	1.01783	1.00233	0.982319	0.961958	0.944263	0.92831	0.914929	0.904264	0.896754	0.889132	0.879373	0.867089	0.852171	0.837091	0.823086	0.812945	0.807363	0.807089	0.812	0.82332	0.839498	0.860296	0.884727	0.913245	0.944379	0.978439	1.01232	1.04481	1.07398	1.09872	1.11621	1.12361	1.11947	1.10141
[truncated: 50 more columns]

## Sheet: 2
0.479948	0.597826	0.741039	0.870251	0.983911	1.08897	1.17988	1.25747	1.32103	1.36847	1.39863	1.41146	1.40785	1.38786	1.35252	1.30237	1.24176	1.17409	1.10197	1.02983	0.95991	0.894704	0.836795	0.787615	0.74739	0.716504	0.693816	0.678579	0.670232	0.668451	0.673387	0.683702	0.698496	0.716895	0.738299	0.760954	0.784554	0.808415	0.832008	0.853393	0.871556	0.885603	0.894168	0.896708	0.89205	0.878453	0.85516	0.822421	0.778221	0.722903
0.390697	0.475589	0.554957	0.639335	0.714902	0.781744	0.842387	0.895335	0.939766	0.974859	1.00019	1.01584	1.02248	1.02069	1.01138	0.996219	0.976798	0.954528	0.931355	0.908754	0.888324	0.871841	0.853629	0.841499	0.832641	0.827272	0.82552	0.827154	0.831811	0.838956	0.847313	0.857737	0.869912	0.883477	0.897566	0.911338	0.924196	0.936018	0.946305	0.954961	0.961972	0.966914	0.969257	0.9684	0.963737	0.95422	0.938732	0.916945	0.88818	0.8523
0.524848	0.623082	0.717119	0.809789	0.900031	0.989803	1.07373	1.15089	1.21761	1.26883	1.30127	1.31325	1.30576	1.27982	1.23738	1.18181	1.11584	1.04341	0.968754	0.894387	0.825604	0.765793	0.714307	0.672397	0.640722	0.619194	0.608972	0.610039	0.621666	0.643124	0.673329	0.710608	0.755129	0.803061	0.852485	0.903585	0.954131	1.00156	1.04284	1.078	1.10619	1.12565	1.13556	1.13441	1.11901	1.08833	1.04451	0.984282	0.90546	0.817075
0.527251	0.644481	0.753997	0.853047	0.942573	1.0237	1.09614	1.15901	1.2111	1.24905	1.27489	1.28488	1.27744	1.2565	1.2201	1.17259	1.11475	1.05086	0.982805	0.916849	0.856882	0.801515	0.755025	0.717562	0.688775	0.669396	0.659458	0.658336	0.666361	0.681943	0.702738	0.728069	0.757309	0.788525	0.819674	0.84983	0.879141	0.903919	0.925235	0.941968	0.953501	0.959446	0.959811	0.954033	0.94147	0.921379	0.893686	0.858486	0.815585	0.764524
0.457611	0.545536	0.627013	0.702016	0.770644	0.832188	0.888286	0.939039	0.983721	1.02095	1.04959	1.06936	1.07958	1.07977	1.07033	1.05252	1.02752	0.996897	0.962702	0.925919	0.888344	0.852241	0.818731	0.789191	0.764907	0.746545	0.734582	0.72915	0.729993	0.736499	0.748023	0.763959	0.782879	0.804432	0.827413	0.851162	0.874894	0.898132	0.920079	0.940756	0.958686	0.973346	0.983688	0.989179	0.989517	0.982736	0.968353	0.94541	0.911445	0.866333
0.487321	0.620761	0.743945	0.860877	0.960515	1.0496	1.12998	1.19945	1.25646	1.29774	1.32269	1.32982	1.31904	1.29177	1.25184	1.20322	1.15148	1.09595	1.03948	0.985084	0.934961	0.887893	0.844329	0.804143	0.768597	0.738091	0.712906	0.693525	0.680171	0.672548	0.670247	0.67313	0.68068	0.691579	0.706046	0.723869	0.74476	0.768749	0.794313	0.819418	0.842769	0.862963	0.878726	0.888457	0.89073	0.884552	0.8687	0.841417	0.80116	0.744567
0.447493	0.552428	0.652737	0.748802	0.840504	0.926738	0.998508	1.05982	1.10844	1.14333	1.16422	1.16996	1.16167	1.13985	1.10743	1.06762	1.02229	0.973618	0.924676	0.878016	0.837095	0.803241	0.777054	0.75813	0.746066	0.74005	0.73957	0.744115	0.753662	0.767203	0.785081	0.806931	0.830341	0.855689	0.883095	0.911602	0.939141	0.966141	0.992287	1.01478	1.03408	1.04893	1.05768	1.05904	1.05227	1.03661	1.0108	0.972624	0.921485	0.858643
0.411326	0.506282	0.586135	0.660932	0.724053	0.782028	0.832558	0.877962	0.91836	0.952562	0.979834	0.998912	1.00919	1.01068	1.004	0.990201	0.971126	0.948294	0.923199	0.897976	0.873918	0.852447	0.835983	0.824834	0.819491	0.819869	0.824923	0.833548	0.844921	0.85848	0.873507	0.889457	0.906521	0.924686	0.943731	0.963171	0.982286	1.00052	1.01701	1.0305	1.04088	1.04795	1.05043	1.04835	1.04081	1.02681	1.00532	0.976279	0.938054	0.889106
0.569915	0.670363	0.766221	0.857191	0.939946	1.01382	1.0797	1.1352	1.17494	1.20195	1.21579	1.21355	1.19706	1.16896	1.12945	1.0808	1.02618	0.967779	0.909061	0.851815	0.798353	0.750072	0.709457	0.677403	0.655457	0.64391	0.640778	0.644829	0.656024	0.674026	0.697958	0.726957	0.760315	0.796514	0.834241	0.872098	0.9088	0.943337	0.974332	1.00064	1.02006	1.03154	1.03314	1.02427	1.0041	0.971744	0.927382	0.869967	0.801942	0.724752
0.403098	0.494916	0.585077	0.671809	0.754117	0.830573	0.899482	0.959839	1.01181	1.05487	1.08854	1.11161	1.12367	1.12687	1.12175	1.10809	1.0867	1.05641	1.02601	0.993872	0.960125	0.930666	0.90358	0.879964	0.860118	0.843901	0.831485	0.822726	0.817297	0.815184	0.816538	0.821242	0.82817	0.837223	0.848334	0.861232	0.875748	0.891323	0.907006	0.922269	0.936666	0.949996	0.958405	0.962726	0.961015	0.951906	0.936188	0.910005	0.870295	0.814499
0.630929	0.773664	0.903997	1.01409	1.10454	1.17586	1.22722	1.26058	1.27818	1.28088	1.26915	1.24276	1.20334	1.15226	1.09284	1.02493	0.950038	0.877906	0.809236	0.746513	0.693425	0.650045	0.61702	0.594406	0.582094	0.579492	0.585685	0.599659	0.619856	0.645041	0.674342	0.70584	0.738221	0.770944	0.803226	0.834456	0.86429	0.892493	0.918457	0.941884	0.962244	0.97862	0.990198	0.995849	0.994595	0.985094	0.966281	0.939663	0.903028	0.855142
0.606652	0.713128	0.806372	0.888169	0.959261	1.02173	1.07868	1.12993	1.17426	1.20876	1.23356	1.24698	1.24645	1.23333	1.20733	1.16799	1.11974	1.0652	1.00683	0.947802	0.890754	0.836484	0.787686	0.751305	0.723292	0.704238	0.694788	0.693184	0.69844	0.709735	0.726717	0.7486	0.77461	0.803703	0.835066	0.867004	0.898824	0.929726	0.958954	0.984138	1.00416	1.02	1.02781	1.02529	1.01301	0.99051	0.957562	0.914633	0.858195	0.788695
0.49392	0.662326	0.793626	0.929755	1.06834	1.19984	1.33016	1.43881	1.53407	1.6063	1.64985	1.66426	1.65064	1.61147	1.55341	1.48303	1.40554	1.32107	1.23635	1.15404	1.07627	1.0045	0.941092	0.88192	0.835293	0.795924	0.762944	0.738669	0.723279	0.715755	0.715481	0.722618	0.737501	0.76345	0.788889	0.824977	0.867783	0.912055	0.961764	1.01977	1.07344	1.12621	1.17808	1.21523	1.24539	1.26185	1.2625	1.24543	1.20819	1.14793
0.383367	0.499064	0.614211	0.726444	0.837942	0.948345	1.05196	1.15073	1.2345	1.29835	1.33957	1.35621	1.34835	1.31685	1.26528	1.19851	1.11886	1.03529	0.947781	0.85994	0.776462	0.701499	0.635658	0.581872	0.542351	0.515379	0.50122	0.499563	0.509214	0.528656	0.556076	0.589768	0.628307	0.670274	0.714468	0.759842	0.80619	0.85151	0.894785	0.936668	0.975883	1.012	1.04402	1.07071	1.09018	1.10074	1.10046	1.08732	1.05945	1.01394
0.399218	0.486688	0.570386	0.654647	0.739173	0.822367	0.902216	0.975284	1.03738	1.08719	1.12468	1.14998	1.16282	1.16339	1.15258	1.13298	1.10448	1.06891	1.02793	0.984082	0.939841	0.897127	0.857811	0.822941	0.793511	0.770529	0.753493	0.742336	0.737111	0.737743	0.743322	0.75325	0.767606	0.785865	0.807169	0.830481	0.854722	0.879903	0.90486	0.928823	0.95069	0.969166	0.983579	0.99319	0.996251	0.991324	0.977635	0.953378	0.916952	0.866072
0.440808	0.544077	0.641851	0.733643	0.821001	0.904008	0.979085	1.0448	1.10069	1.14442	1.17533	1.19259	1.19483	1.18259	1.15657	1.12037	1.07564	1.02489	0.971201	0.915893	0.86219	0.812772	0.769438	0.733635	0.705385	0.684607	0.672297	0.668076	0.67141	0.68191	0.698531	0.720382	0.747089	0.777926	0.812376	0.849338	0.887973	0.92683	0.964703	1.00044	1.03237	1.05871	1.07748	1.08677	1.08526	1.07162	1.04527	1.00447	0.947065	0.873619
0.356365	0.455972	0.558991	0.664312	0.771254	0.877419	0.978948	1.07181	1.15136	1.21406	1.25927	1.28652	1.29562	1.28606	1.25974	1.22154	1.17286	1.11721	1.05688	0.99497	0.935118	0.880279	0.831517	0.788904	0.753055	0.724027	0.702385	0.68725	0.678884	0.675923	0.678231	0.686015	0.698601	0.715351	0.736208	0.75953	0.788005	0.81852	0.851069	0.886136	0.921994	0.957137	0.990141	1.01952	1.0431	1.05859	1.06369	1.05531	1.03127	0.988035
0.595208	0.718841	0.829325	0.929219	1.02034	1.09992	1.16961	1.22613	1.26947	1.29888	1.31202	1.31086	1.29596	1.26669	1.22453	1.17186	1.11317	1.0519	0.990682	0.931677	0.87753	0.82983	0.790742	0.760671	0.73944	0.72534	0.7174	0.714986	0.717929	0.726101	0.73978	0.758139	0.780444	0.806413	0.833802	0.861978	0.890799	0.918868	0.944944	0.967779	0.98632	0.999952	1.00725	1.00665	0.996388	0.975623	0.942379	0.895188	0.835961	0.765128
0.511735	0.614441	0.712748	0.806656	0.89577	0.981107	1.06207	1.13372	1.19356	1.23897	1.26915	1.282	1.27602	1.25267	1.21475	1.16595	1.10893	1.04601	0.98203	0.918929	0.859889	0.806809	0.76039	0.721672	0.69066	0.667347	0.652522	0.646074	0.647385	0.656423	0.672314	0.69447	0.722695	0.756093	0.793924	0.834721	0.877403	0.920184	0.962375	1.00263	1.04074	1.07275	1.09728	1.11205	1.11531	1.10501	1.08033	1.03921	0.979806	0.903111
0.552717	0.68233	0.806884	0.924012	1.03029	1.12292	1.20019	1.25861	1.29326	1.30718	1.30198	1.27988	1.2437	1.19522	1.13816	1.07662	1.01718	0.960116	0.905347	0.859171	0.821	0.788784	0.766742	0.751082	0.74167	0.738037	0.739516	0.745273	0.754958	0.767693	0.781531	0.798011	0.816666	0.837231	0.85929	0.882877	0.908324	0.935764	0.96538	0.994172	1.02127	1.04491	1.06235	1.07072	1.06578	1.04527	1.00657	0.949299	0.873601	0.776492
0.534061	0.651079	0.761227	0.865053	0.964141	1.05265	1.13307	1.20118	1.25384	1.29226	1.3139	1.31928	1.30868	1.28192	1.24135	1.18934	1.13016	1.06715	1.00395	0.9421	0.883784	0.830706	0.78387	0.744264	0.712456	0.688419	0.671802	0.661863	0.658946	0.662576	0.671648	0.686663	0.706959	0.731681	0.760122	0.790934	0.824193	0.85749	0.889452	0.919774	0.946867	0.969118	0.984713	0.992592	0.990164	0.97649	0.948684	0.906188	0.846954	0.772263
0.410894	0.513105	0.607298	0.696176	0.781704	0.86515	0.945892	1.02117	1.08731	1.13934	1.17815	1.20087	1.20588	1.19403	1.16776	1.13257	1.08712	1.03729	0.984922	0.932605	0.883487	0.839148	0.801121	0.770979	0.748811	0.734256	0.727289	0.726558	0.731242	0.740147	0.752817	0.768925	0.788514	0.811118	0.836463	0.864898	0.89586	0.927923	0.9614	0.993858	1.02333	1.04886	1.06905	1.08233	1.08683	1.0801	1.0606	1.02712	0.976657	0.910845
0.353671	0.442932	0.529548	0.615782	0.696548	0.778618	0.857373	0.929438	0.992267	1.04368	1.08192	1.10554	1.11469	1.11179	1.09756	1.07346	1.04188	1.00609	0.968841	0.93216	0.898799	0.870011	0.846381	0.827083	0.812256	0.801538	0.794525	0.791042	0.790695	0.793101	0.79821	0.806267	0.817117	0.830313	0.845661	0.863273	0.883572	0.906824	0.93342	0.963728	0.996587	1.03047	1.06325	1.0918	1.11334	1.12494	1.12467	1.11036	1.07918	1.02787
0.312229	0.426099	0.533675	0.631282	0.720788	0.804218	0.883833	0.959678	1.02915	1.0906	1.14071	1.17791	1.1999	1.20514	1.19479	1.17047	1.13466	1.09044	1.04036	0.988283	0.938712	0.893909	0.855383	0.824304	0.800941	0.784682	0.775071	0.770936	0.771479	0.775964	0.783696	0.794787	0.80895	0.826112	0.84545	0.867285	0.891324	0.917053	0.943945	0.97154	0.99935	1.02675	1.05238	1.07444	1.09073	1.09898	1.09718	1.08353	1.05583	1.01144
0.293885	0.38787	0.483899	0.57787	0.673286	0.768047	0.860657	0.94716	1.02433	1.09018	1.1397	1.17237	1.18812	1.18736	1.17257	1.14611	1.1105	1.06797	1.02044	0.970525	0.920059	0.872601	0.828526	0.789612	0.758716	0.73403	0.716632	0.705788	0.701323	0.702737	0.709282	0.720123	0.7347	0.752823	0.774719	0.799785	0.82788	0.85884	0.892328	0.927729	0.96401	0.999065	1.03201	1.0605	1.08235	1.09551	1.09884	1.09099	1.06998	1.03216
0.444904	0.544613	0.641182	0.734876	0.825522	0.911676	0.987941	1.05548	1.11207	1.15541	1.18397	1.19695	1.19582	1.18103	1.1532	1.11348	1.06644	1.01451	0.959276	0.901555	0.847663	0.799209	0.758717	0.727377	0.704679	0.691517	0.687466	0.691784	0.703185	0.720659	0.743195	0.769891	0.799517	0.830093	0.862654	0.895455	0.928598	0.960307	0.990777	1.01897	1.04408	1.06506	1.08054	1.0896	1.09109	1.08375	1.06639	1.03776	0.99596	0.939815
0.509069	0.617898	0.715859	0.806305	0.891273	0.97124	1.04447	1.10859	1.16136	1.19939	1.22303	1.23072	1.22091	1.19465	1.15414	1.10295	1.04235	0.976181	0.907142	0.838779	0.776868	0.719254	0.672011	0.634546	0.606277	0.58756	0.578232	0.577538	0.584774	0.599173	0.620262	0.649164	0.685923	0.728868	0.777091	0.829679	0.886843	0.948218	1.00839	1.0661	1.11986	1.16612	1.20163	1.22459	1.23253	1.22303	1.19401	1.1454	1.07431	0.979848
0.397666	0.501107	0.597245	0.683122	0.760351	0.831352	0.896979	0.957154	1.0104	1.05549	1.09128	1.11652	1.12929	1.12857	1.11503	1.09096	1.05921	1.02231	0.982479	0.9419	0.903075	0.867304	0.835669	0.809131	0.787821	0.772121	0.762159	0.757926	0.759638	0.766749	0.778599	0.79478	0.81481	0.837869	0.86437	0.892292	0.921057	0.951208	0.981833	1.01168	1.03924	1.06246	1.07914	1.08812	1.08815	1.07699	1.05377	1.01724	0.965384	0.896732
0.332647	0.431949	0.52748	0.618719	0.704543	0.783312	0.856093	0.923455	0.984163	1.03634	1.07886	1.11119	1.13077	1.13562	1.12614	1.10422	1.07296	1.03446	0.990559	0.946053	0.904296	0.867419	0.835273	0.808783	0.787987	0.772383	0.762426	0.755715	0.753447	0.755666	0.761945	0.772518	0.787589	0.806763	0.829464	0.855511	0.88469	0.916204	0.949602	0.984231	1.01941	1.0547	1.08857	1.11869	1.14275	1.15793	1.16125	1.14999	1.12152	1.07298
0.431364	0.532798	0.634497	0.725221	0.812083	0.895419	0.973808	1.04617	1.10936	1.16165	1.20219	1.22785	1.23761	1.23283	1.21544	1.1876	1.15204	1.11094	1.06748	1.02492	0.985483	0.949152	0.918128	0.893303	0.874695	0.862124	0.855508	0.854494	0.858914	0.868833	0.883667	0.901809	0.922232	0.944788	0.970127	0.998162	1.02639	1.0561	1.08603	1.11521	1.14421	1.17109	1.19451	1.21183	1.22063	1.21761	1.20237	1.17209	1.12351	1.05448
0.326441	0.418461	0.505619	0.587972	0.665528	0.741206	0.813004	0.880455	0.942969	0.997321	1.04178	1.07432	1.09271	1.09717	1.08971	1.07292	1.04839	1.01821	0.985548	0.948636	0.91463	0.882736	0.854135	0.830366	0.81228	0.800218	0.792916	0.790306	0.791434	0.797383	0.807055	0.820393	0.836608	0.855249	0.876073	0.897464	0.920693	0.944076	0.96646	0.98792	1.00821	1.02703	1.04349	1.05637	1.06508	1.06753	1.06215	1.04865	1.02483	0.98696
0.506012	0.628193	0.742716	0.849298	0.947339	1.03593	1.11367	1.18161	1.23476	1.26837	1.29156	1.30092	1.29296	1.27075	1.23678	1.19601	1.14603	1.09528	1.04253	0.989066	0.936644	0.886754	0.840539	0.798677	0.76072	0.727534	0.69945	0.67656	0.659227	0.647377	0.641463	0.641195	0.645998	0.655684	0.670869	0.690858	0.715523	0.744508	0.777366	0.812892	0.849657	0.88554	0.917167	0.943646	0.962492	0.970948	0.966774	0.947616	0.911965	0.858467
0.406013	0.516019	0.62289	0.728199	0.832143	0.93316	1.02874	1.11576	1.19213	1.24983	1.28873	1.3114	1.31516	1.29945	1.26538	1.22056	1.15848	1.08704	1.01555	0.941247	0.868378	0.800443	0.739648	0.686429	0.642124	0.607095	0.582008	0.566024	0.55873	0.559232	0.566896	0.581628	0.602454	0.629124	0.660767	0.698746	0.742508	0.790809	0.841542	0.89652	0.950383	1.00462	1.05601	1.09676	1.12718	1.14396	1.14461	1.12598	1.09034	1.03561
0.381673	0.481585	0.573271	0.658622	0.738251	0.815628	0.888911	0.955707	1.01232	1.05575	1.08409	1.09658	1.09452	1.08009	1.05579	1.02327	0.984225	0.941216	0.896956	0.854019	0.815388	0.783883	0.760126	0.745132	0.738583	0.739483	0.746744	0.758113	0.772412	0.788566	0.805939	0.824454	0.844716	0.866598	0.889788	0.913729	0.937793	0.96176	0.985225	1.00836	1.02993	1.0492	1.0648	1.07581	1.08004	1.07566	1.06096	1.03411	0.993081	0.935724
0.339962	0.438311	0.537239	0.639479	0.745443	0.853893	0.957799	1.05432	1.13823	1.20543	1.25665	1.28785	1.29812	1.2895	1.26525	1.22727	1.17731	1.12004	1.05681	0.993601	0.932277	0.873405	0.819999	0.77323	0.734601	0.70239	0.678736	0.663041	0.655322	0.655453	0.663308	0.677524	0.697001	0.72115	0.749975	0.781602	0.815106	0.849124	0.88512	0.922917	0.961028	0.998836	1.0344	1.06491	1.08716	1.09875	1.0963	1.07796	1.04111	0.983701
0.325343	0.421758	0.510062	0.590279	0.666935	0.744009	0.821271	0.89716	0.966444	1.02645	1.07463	1.10924	1.12626	1.12747	1.11411	1.08779	1.05109	1.00721	0.959889	0.912439	0.868232	0.828498	0.794778	0.768031	0.748281	0.735502	0.728715	0.72668	0.729307	0.736311	0.747534	0.762984	0.782096	0.805122	0.832196	0.863628	0.897989	0.935893	0.976973	1.01956	1.06321	1.10609	1.14562	1.17927	1.20387	1.2169	1.21464	1.19517	1.15583	1.0933
0.405213	0.5249	0.634705	0.74133	0.842356	0.942739	1.03254	1.11103	1.17521	1.22335	1.25517	1.2693	1.26586	1.24673	1.216	1.17705	1.13191	1.08276	1.0336	0.987342	0.945938	0.909388	0.876839	0.850498	0.828856	0.811741	0.798683	0.789259	0.783264	0.780878	0.782022	0.786228	0.792508	0.800854	0.811478	0.823763	0.837241	0.851451	0.867038	0.883948	0.902777	0.922443	0.943457	0.961423	0.975299	0.982355	0.979708	0.964291	0.933803	0.885
0.410338	0.505753	0.59368	0.673914	0.749731	0.821886	0.88942	0.951168	1.00399	1.04382	1.07144	1.08547	1.08579	1.07489	1.05581	1.03069	1.00111	0.967971	0.932605	0.896532	0.861397	0.828155	0.797341	0.771483	0.751456	0.737433	0.729626	0.727617	0.73117	0.739787	0.752984	0.770484	0.791326	0.814703	0.840439	0.868035	0.898256	0.930703	0.96536	1.00113	1.03646	1.07041	1.10195	1.12797	1.14608	1.15383	1.14943	1.13162	1.09875	1.04869
0.399856	0.520461	0.631972	0.734526	0.834346	0.932297	1.02346	1.10425	1.17073	1.21876	1.24708	1.25372	1.24213	1.21432	1.17387	1.1238	1.06967	1.01753	0.968566	0.924905	0.88752	0.856508	0.831522	0.81245	0.798337	0.788107	0.781873	0.779092	0.778883	0.780747	0.785111	0.792686	0.803433	0.816803	0.833672	0.853216	0.875956	0.901346	0.929047	0.958206	0.987577	1.01664	1.04211	1.06325	1.07589	1.07696	1.064	1.03442	0.985443	0.913234
0.38757	0.491694	0.590151	0.683175	0.770339	0.850767	0.924989	0.987747	1.03878	1.0779	1.10585	1.12221	1.12716	1.12179	1.10705	1.08404	1.0552	1.02393	0.992265	0.961202	0.933341	0.908546	0.887774	0.871001	0.858124	0.848244	0.841185	0.836437	0.834291	0.834577	0.837039	0.841597	0.848467	0.857775	0.86939	0.883265	0.899666	0.919054	0.940259	0.963314	0.987731	1.01267	1.03633	1.05653	1.07068	1.07582	1.06887	1.04714	1.00678	0.944169
0.48335	0.594301	0.695464	0.78697	0.870281	0.94589	1.01221	1.06846	1.11262	1.14243	1.15806	1.15861	1.14565	1.12189	1.09109	1.05529	1.01749	0.979592	0.945464	0.915107	0.889663	0.86912	0.853553	0.842556	0.835878	0.833253	0.834067	0.837462	0.843004	0.850431	0.859455	0.869598	0.880623	0.892313	0.904733	0.918143	0.932219	0.946657	0.961255	0.975855	0.989671	1.00217	1.01144	1.01612	1.01411	1.00352	0.981935	0.946576	0.895533	0.82606
0.31852	0.414397	0.504284	0.586336	0.661519	0.737711	0.809467	0.87798	0.939279	0.99391	1.04023	1.07546	1.09839	1.10874	1.10721	1.09429	1.07135	1.04023	1.00357	0.964032	0.924185	0.886986	0.85401	0.824832	0.802125	0.785518	0.773564	0.766358	0.764333	0.767191	0.774205	0.784814	0.799688	0.818863	0.842545	0.869819	0.902185	0.937081	0.974629	1.01297	1.04985	1.08384	1.113	1.13517	1.14698	1.14732	1.1349	1.10944	1.06793	1.00448
0.409338	0.516662	0.616375	0.708669	0.791314	0.86565	0.930947	0.98602	1.02979	1.06253	1.08348	1.09361	1.09376	1.08375	1.06495	1.03777	1.00169	0.961419	0.918879	0.878298	0.841013	0.808167	0.780276	0.757818	0.740946	0.728778	0.721006	0.717117	0.716687	0.719938	0.727257	0.738517	0.753306	0.771723	0.792881	0.816878	0.843932	0.874032	0.906211	0.940736	0.976932	1.01231	1.04587	1.07664	1.10061	1.11672	1.12261	1.11642	1.09595	1.05947
0.234817	0.335475	0.435022	0.531247	0.622736	0.704234	0.775732	0.842444	0.903306	0.955027	1	1.03634	1.06371	1.08182	1.0907	1.08957	1.07863	1.05856	1.03179	0.999176	0.963695	0.928133	0.894319	0.865566	0.842087	0.825544	0.813937	0.807226	0.804923	0.805574	0.808226	0.812413	0.817786	0.824957	0.833963	0.84485	0.858015	0.872773	0.889823	0.908471	0.928365	0.948588	0.96756	0.984544	0.998235	1.0074	1.01078	1.00718	0.995019	0.972238
0.320283	0.419914	0.50808	0.586852	0.657292	0.725375	0.794993	0.862213	0.927653	0.987195	1.03902	1.08088	1.10976	1.12436	1.12464	1.11112	1.08551	1.05065	1.00962	0.966395	0.924263	0.886069	0.853915	0.828635	0.810519	0.799032	0.793409	0.792725	0.796265	0.803672	0.814591	0.828299	0.844395	0.862487	0.882495	0.904041	0.92694	0.950157	0.975201	1.00169	1.02933	1.05732	1.0839	1.10692	1.12351	1.13164	1.12855	1.11239	1.08145	1.03459
0.352919	0.457276	0.552021	0.636403	0.7125	0.785798	0.856536	0.924956	0.988447	1.04436	1.09002	1.12321	1.14281	1.14675	1.13662	1.11484	1.08353	1.04409	0.998335	0.949352	0.899572	0.851875	0.808249	0.77032	0.739068	0.714271	0.695519	0.682601	0.67454	0.670423	0.67061	0.675561	0.685683	0.700328	0.719481	0.742876	0.771032	0.803552	0.840051	0.878914	0.920177	0.96248	1.00507	1.04631	1.08321	1.113	1.13302	1.14119	1.13562	1.1126
0.364251	0.493146	0.614105	0.720156	0.814235	0.895859	0.967452	1.02845	1.08125	1.1223	1.15287	1.17234	1.17985	1.17429	1.15743	1.13047	1.09469	1.05318	1.00747	0.960511	0.913598	0.868577	0.827062	0.791072	0.761212	0.737511	0.720322	0.709464	0.704189	0.704443	0.70998	0.720202	0.734174	0.750882	0.770001	0.792372	0.81678	0.842924	0.871338	0.901019	0.931754	0.963179	0.992892	1.02034	1.04224	1.05643	1.06071	1.05378	1.03418	0.997803
0.355409	0.45338	0.541063	0.615625	0.679368	0.735076	0.785954	0.83229	0.875114	0.914734	0.950336	0.980368	1.00359	1.02066	1.03032	1.03165	1.0249	1.01133	0.992218	0.968505	0.943499	0.919419	0.897707	0.878994	0.863898	0.852142	0.843031	0.836687	0.83337	0.832771	0.834772	0.839568	0.847466	0.857845	0.869977	0.883797	0.899837	0.918199	0.938945	0.962242	0.987386	1.0133	1.03857	1.06162	1.08036	1.09275	1.09693	1.09124	1.0737	1.04138
0.273502	0.3611	0.446566	0.530119	0.60944	0.686885	0.763383	0.837044	0.90485	0.966677	1.0187	1.0595	1.08738	1.10015	1.10004	1.08881	1.06863	1.04233	1.01207	0.980425	0.948742	0.918029	0.890619	0.866125	0.845736	0.829474	0.817469	0.808979	0.804488	0.804232	0.808062	0.815757	0.827084	0.842256	0.860869	0.882279	0.906228	0.932819	0.961269	0.991352	1.0224	1.05254	1.07999	1.10302	1.11995	1.12812	1.12608	1.11247	1.08638	1.04624
0.282204	0.36481	0.447546	0.530667	0.617195	0.705273	0.794452	0.880097	0.957664	1.02295	1.07385	1.11028	1.12984	1.1335	1.12236	1.09828	1.06423	1.02406	0.980869	0.938235	0.898902	0.864322	0.835794	0.814412	0.799505	0.791183	0.788318	0.790318	0.796761	0.806941	0.820431	0.836631	0.854498	0.873736	0.893293	0.913494	0.93417	0.955494	0.977428	0.999994	1.02207	1.04223	1.05837	1.06882	1.0718	1.06495	1.04721	1.0179	0.974715	0.915671
0.230896	0.317008	0.395528	0.471579	0.550616	0.635672	0.726028	0.816818	0.901297	0.975667	1.03635	1.08101	1.10939	1.12309	1.12226	1.10672	1.07902	1.04264	1.00144	0.959626	0.92047	0.885965	0.857195	0.834886	0.818022	0.805983	0.798139	0.794439	0.795087	0.800284	0.809968	0.823092	0.83797	0.853476	0.870248	0.888612	0.908923	0.931369	0.954694	0.978915	1.00315	1.02732	1.05057	1.0722	1.09099	1.10581	1.11451	1.11429	1.10293	1.07784
0.262992	0.359731	0.457245	0.547829	0.629998	0.706811	0.780962	0.853785	0.923959	0.988564	1.04476	1.08819	1.11728	1.1312	1.13103	1.11744	1.09431	1.06321	1.0263	0.985823	0.943497	0.901595	0.862047	0.825961	0.793692	0.76578	0.743067	0.725437	0.712938	0.70511	0.7024	0.704736	0.712084	0.724047	0.7399	0.759148	0.781318	0.806686	0.834936	0.866248	0.900145	0.935037	0.970181	1.00398	1.03484	1.06114	1.08166	1.09609	1.10477	1.10594
0.373491	0.497533	0.608345	0.706183	0.794079	0.876348	0.95161	1.02039	1.07648	1.12117	1.15215	1.16777	1.16595	1.14875	1.11877	1.07923	1.03115	0.977151	0.922935	0.871161	0.824846	0.784708	0.752096	0.727357	0.710508	0.701216	0.698674	0.701531	0.709337	0.721879	0.738204	0.757601	0.77965	0.80502	0.833239	0.863272	0.893964	0.92526	0.957904	0.991539	1.02558	1.05885	1.08893	1.11325	1.12894	1.13268	1.12227	1.09663	1.05287	0.986387
0.357132	0.453209	0.538527	0.610464	0.680404	0.747606	0.815549	0.882983	0.947128	1.00463	1.05272	1.08827	1.11027	1.11802	1.1131	1.09752	1.07281	1.04137	1.00632	0.969888	0.933759	0.898062	0.864754	0.834383	0.807595	0.784579	0.765986	0.752361	0.744523	0.74312	0.747894	0.757994	0.773292	0.793203	0.817704	0.845614	0.875798	0.90807	0.942329	0.977993	1.01365	1.04765	1.07901	1.10442	1.1213	1.12677	1.11844	1.09542	1.05533	0.995806
0.418528	0.531649	0.620929	0.697581	0.767333	0.833694	0.891238	0.944131	0.989085	1.0285	1.06159	1.08536	1.09976	1.10408	1.09842	1.08069	1.05397	1.01988	0.981836	0.942163	0.903666	0.869599	0.840389	0.815656	0.796032	0.780721	0.77007	0.76529	0.766195	0.771429	0.780482	0.793544	0.810304	0.829686	0.851648	0.876172	0.90323	0.933311	0.96558	1.00105	1.03559	1.06976	1.10061	1.12402	1.1401	1.14413	1.13528	1.11184	1.07137	1.01216
0.264724	0.351578	0.426898	0.49138	0.548804	0.602056	0.653491	0.705095	0.758025	0.812076	0.862457	0.909553	0.951839	0.987905	1.01541	1.03187	1.03741	1.03264	1.01917	1.00082	0.980261	0.959597	0.940176	0.922598	0.906287	0.892493	0.880489	0.870378	0.861984	0.855576	0.851155	0.848168	0.846498	0.846959	0.850744	0.858326	0.870597	0.887841	0.909105	0.933161	0.959354	0.986791	1.01457	1.04156	1.06674	1.08761	1.1023	1.10824	1.10355	1.08453
[truncated: 50 more columns]
