# Supplementary material for: Comparison of sagittal plane gait characteristics between the overground and treadmill approach for gait analysis in typically developing children
Source: PeerJ. 2022 Jul 22;10:e13752. doi: 10.7717/peerj.13752 (PMC9310770; doi:10.7717/peerj.13752)
Supplement: Supplemental Information 8 — Each colum represents a percentage of the gait cycle (0–100%). Every raw represents data of one child.Sheet 1 data of the overground approachSheet 2 data of the treadmill approach [file peerj-10-13752-s008.xlsx]

## Sheet: 1
-0.22122	-0.202544	-0.114515	0.062016	0.25557	0.395772	0.507363	0.613981	0.687969	0.729296	0.75771	0.760546	0.743846	0.709179	0.665241	0.605413	0.535059	0.462126	0.392393	0.327847	0.270289	0.220733	0.178606	0.143159	0.114984	0.0930402	0.076781	0.0637873	0.0564643	0.035393	0.0101804	0.0101489	0.0406118	0.0502807	0.054961	0.0620456	0.0718614	0.0854106	0.0991663	0.112797	0.1271	0.14223	0.158382	0.17494	0.192346	0.2102	0.22758	0.245223	0.263557	0.278385
-0.335448	-0.435329	-0.250003	0.100795	0.19523	0.234721	0.312903	0.409931	0.436586	0.45293	0.457938	0.457576	0.446128	0.431016	0.416196	0.381173	0.339201	0.282499	0.217343	0.157925	0.104862	0.0611288	0.0234749	-0.0122333	-0.0475356	-0.0822997	-0.114342	-0.142688	-0.168047	-0.192316	-0.21495	-0.233851	-0.242189	-0.240022	-0.230433	-0.217751	-0.208018	-0.204695	-0.207456	-0.214329	-0.219441	-0.219522	-0.214555	-0.201622	-0.178954	-0.148552	-0.110417	-0.0656097	-0.0181343	0.0199413
-0.0328631	-0.0737935	-0.046321	0.0305779	0.184928	0.311832	0.422665	0.580874	0.662776	0.687863	0.691662	0.666114	0.627103	0.573473	0.509779	0.438489	0.36608	0.298109	0.235095	0.175575	0.119793	0.069108	0.0253628	-0.0123624	-0.0443297	-0.0686105	-0.0836123	-0.0933521	-0.0984046	-0.0987697	-0.0962825	-0.0928788	-0.0858823	-0.0805571	-0.0755704	-0.0720198	-0.0721305	-0.0744047	-0.0785834	-0.0828126	-0.0859815	-0.0866301	-0.0841357	-0.0776278	-0.0668649	-0.0506992	-0.0318159	-0.00922536	0.0151931	0.0406706
-0.317814	-0.433196	-0.252892	0.00918519	0.0400999	0.0415218	0.0572031	0.0906097	0.0906553	0.0914516	0.0902275	0.0825324	0.0716239	0.0577562	0.0447695	0.0332544	0.0210395	0.00566791	-0.0106521	-0.0237893	-0.0357156	-0.0465955	-0.0552669	-0.0609468	-0.0633297	-0.0615355	-0.0559205	-0.0496189	-0.0446639	-0.0445861	-0.0505043	-0.0602731	-0.0714626	-0.0811138	-0.092916	-0.106448	-0.119576	-0.131146	-0.142398	-0.154326	-0.165474	-0.175882	-0.183678	-0.188866	-0.189961	-0.18626	-0.182506	-0.203512	-0.217283	-0.114963
-0.186575	-0.202237	-0.184982	-0.240659	-0.349943	-0.246323	-0.0300659	0.136861	0.194821	0.221968	0.259344	0.312889	0.331577	0.333187	0.330462	0.320503	0.298297	0.259281	0.206561	0.155218	0.135255	0.109274	0.0626426	-0.00232452	-0.0621337	-0.103603	-0.136059	-0.163129	-0.186063	-0.21081	-0.223339	-0.240883	-0.272853	-0.30056	-0.311572	-0.31232	-0.30999	-0.321378	-0.33158	-0.346769	-0.36151	-0.374529	-0.362846	-0.353978	-0.343917	-0.321805	-0.308853	-0.298579	-0.267235	-0.21416
-0.313008	-0.328345	-0.201533	0.0124123	0.164328	0.253346	0.323827	0.392825	0.437464	0.446319	0.441168	0.436183	0.427239	0.41044	0.387484	0.359652	0.327919	0.29424	0.261694	0.230518	0.201035	0.174941	0.151925	0.131763	0.113632	0.0984073	0.0853787	0.07319	0.0615971	0.0506209	0.0404609	0.0321717	0.0248273	0.0176934	0.0117858	0.00647792	0.00156118	-0.00327571	-0.00619171	-0.00727002	-0.00344508	0.0070638	0.0246297	0.0482818	0.0782697	0.111361	0.14569	0.168999	0.166859	0.108108
-0.244096	-0.286407	-0.350288	-0.398908	-0.255514	-0.12416	0.0266779	0.189367	0.319318	0.435431	0.519235	0.57727	0.607058	0.619544	0.615727	0.590559	0.547458	0.495406	0.44211	0.393939	0.354199	0.319883	0.290359	0.263062	0.237367	0.210522	0.186535	0.164618	0.145111	0.130516	0.11825	0.111433	0.109466	0.112322	0.120053	0.133016	0.149378	0.166823	0.181454	0.192981	0.202617	0.212215	0.211364	0.215193	0.222472	0.230091	0.24095	0.254755	0.265301	0.272384
-0.0929647	-0.141916	-0.14818	-0.0747347	-0.0134347	0.0544893	0.11848	0.170158	0.209822	0.232772	0.234588	0.230635	0.220198	0.221572	0.229499	0.230156	0.226992	0.222266	0.215141	0.207682	0.199272	0.189196	0.177531	0.169041	0.161939	0.155952	0.146162	0.134693	0.124381	0.115065	0.105671	0.0940803	0.0813241	0.0733607	0.0636487	0.0506324	0.0377211	0.0274956	0.0184745	0.00652004	-0.00741872	-0.0180052	-0.0260188	-0.0355853	-0.0352594	-0.0244827	-0.0137892	-0.00926815	0.00868578	0.0355416
-0.154613	-0.126074	-0.0641678	0.103699	0.293675	0.458841	0.566883	0.670218	0.762949	0.831499	0.865207	0.881482	0.87875	0.8557	0.817081	0.763116	0.693678	0.615831	0.530609	0.445369	0.367031	0.307454	0.236303	0.162652	0.0882448	0.0356163	-0.000460326	-0.0276707	-0.044742	-0.0576686	-0.0643862	-0.0665053	-0.0662234	-0.0629347	-0.0569105	-0.0464199	-0.0344815	-0.0216113	-0.0093672	0.00291792	0.0154085	0.0313831	0.0506317	0.0732185	0.0983374	0.126218	0.156694	0.189141	0.222611	0.254408
-0.216834	-0.234098	-0.0375532	-0.056228	-0.12073	0.0927542	0.209996	0.195862	0.289418	0.375119	0.29901	0.281603	0.273633	0.225362	0.175704	0.152275	0.129422	0.106993	0.0627242	0.0524418	0.05494	-0.0133786	-0.0630115	-0.056478	-0.106022	-0.121257	-0.140892	-0.109873	-0.14293	-0.15443	-0.134455	-0.182533	-0.135446	-0.167195	-0.172443	-0.153439	-0.114253	-0.140919	-0.154344	-0.106529	-0.0947801	-0.113069	-0.0722423	-0.0496322	-0.0399788	0.0241285	0.0253344	0.106858	0.0893284	0.160247
-0.234123	-0.268555	-0.171174	0.00458573	0.0998374	0.218591	0.289071	0.311074	0.350208	0.372964	0.389324	0.390171	0.371611	0.340464	0.303665	0.263982	0.22375	0.185826	0.150961	0.117336	0.0872651	0.0630578	0.0444214	0.0283985	0.0172936	0.00991138	0.00643058	0.00375613	2.21944e-05	-0.00321435	-0.00778283	-0.0124441	-0.0149411	-0.0160766	-0.0174498	-0.0208267	-0.0235199	-0.0272	-0.031934	-0.036592	-0.0393404	-0.0397747	-0.0374817	-0.0322383	-0.0229979	-0.011254	0.00491691	0.0256089	0.0480562	0.0719589
-0.263126	-0.188042	-0.208646	-0.104624	0.0292298	0.18262	0.289844	0.32958	0.37823	0.40116	0.417887	0.414252	0.39265	0.367334	0.330382	0.287479	0.243221	0.198651	0.152958	0.105762	0.0570402	0.011479	-0.0271469	-0.060026	-0.0878113	-0.11118	-0.130143	-0.146075	-0.159293	-0.170405	-0.180636	-0.189035	-0.195543	-0.200604	-0.206066	-0.210782	-0.214468	-0.214992	-0.213965	-0.212133	-0.207603	-0.200665	-0.188624	-0.171429	-0.14772	-0.117792	-0.0816137	-0.0423409	-4.15292e-05	0.04131
-0.362387	-0.403437	-0.275362	0.0722856	0.296783	0.386777	0.433243	0.435501	0.440164	0.453546	0.46126	0.463003	0.440966	0.394288	0.335061	0.272637	0.211134	0.155113	0.10885	0.070735	0.0403804	0.0136466	-0.00962618	-0.0323518	-0.0544016	-0.0753016	-0.0934669	-0.108375	-0.11945	-0.128379	-0.135753	-0.14155	-0.147341	-0.153407	-0.160193	-0.167473	-0.174727	-0.179725	-0.184178	-0.186162	-0.191901	-0.199405	-0.202608	-0.19675	-0.180191	-0.150826	-0.10449	-0.0431781	0.0202607	0.082832
-0.364649	-0.361828	-0.189721	0.0527484	0.193307	0.229633	0.243684	0.277745	0.270214	0.227115	0.189081	0.172922	0.151084	0.119999	0.0927884	0.0663227	0.0390591	0.0133866	-0.00690197	-0.0203982	-0.0273813	-0.0306711	-0.0319974	-0.0329074	-0.0362709	-0.0410086	-0.0489423	-0.060541	-0.0743043	-0.0878268	-0.0996111	-0.108471	-0.116392	-0.124306	-0.133124	-0.142349	-0.151717	-0.160327	-0.167715	-0.175342	-0.181714	-0.185542	-0.186773	-0.176682	-0.159846	-0.141533	-0.109904	-0.0750174	-0.0263343	0.0309941
-0.19633	-0.234684	-0.107576	0.10473	0.0510307	0.119935	0.234141	0.277312	0.309149	0.322944	0.335588	0.339756	0.3296	0.311872	0.284305	0.24613	0.208667	0.17614	0.147146	0.116497	0.0831261	0.0515722	0.0225028	-0.00188819	-0.0216653	-0.0387836	-0.0527559	-0.0621257	-0.066113	-0.0691919	-0.0716355	-0.0717963	-0.0733166	-0.0765388	-0.0782532	-0.0805914	-0.0853345	-0.0919253	-0.0992827	-0.105648	-0.106055	-0.0974112	-0.0766827	-0.0418111	0.00886772	0.0711008	0.136534	0.197228	0.243372	0.268781
-0.239801	-0.217017	-0.243949	-0.204518	-0.0340715	0.0924697	0.228063	0.357787	0.453687	0.516356	0.559941	0.59114	0.59353	0.578731	0.552625	0.519689	0.478682	0.426636	0.366214	0.302398	0.241479	0.187963	0.138755	0.0935697	0.0544306	0.0210371	-0.00771915	-0.0320839	-0.0521435	-0.0688925	-0.0831542	-0.0949435	-0.105197	-0.113346	-0.120417	-0.124709	-0.129067	-0.131855	-0.130746	-0.124205	-0.114124	-0.0993997	-0.0780676	-0.0528233	-0.022249	0.0133498	0.0526759	0.0939513	0.135268	0.172925
-0.165081	-0.148517	-0.107485	0.053992	0.281225	0.408512	0.518443	0.649751	0.743861	0.784453	0.818166	0.836428	0.842196	0.823252	0.78835	0.737222	0.677421	0.612589	0.542977	0.471292	0.401819	0.33746	0.278343	0.225025	0.179507	0.140516	0.109576	0.0836369	0.0621839	0.0458549	0.0311989	0.0189929	0.00822203	-0.00034178	-0.00831416	-0.0166215	-0.0244076	-0.0327292	-0.0399126	-0.0471372	-0.0532908	-0.0559755	-0.0497078	-0.0333564	-0.00669311	0.0287511	0.0709121	0.118551	0.166025	0.210085
-0.257949	-0.16391	-0.0617877	-0.0015919	0.168849	0.221662	0.260595	0.259374	0.248542	0.231408	0.204135	0.184129	0.169462	0.152756	0.13187	0.103458	0.0655182	0.0214855	-0.0217928	-0.0618927	-0.0970885	-0.12861	-0.155454	-0.176383	-0.189668	-0.198984	-0.205944	-0.212197	-0.218558	-0.226557	-0.236874	-0.248696	-0.258432	-0.266592	-0.273637	-0.279686	-0.285963	-0.288562	-0.287185	-0.283863	-0.277502	-0.267056	-0.251016	-0.228758	-0.202181	-0.173244	-0.142392	-0.109856	-0.0788308	-0.0538995
-0.400056	-0.491373	-0.216366	0.0357935	0.0960425	0.118389	0.181266	0.246713	0.26791	0.271711	0.275788	0.272161	0.261681	0.243894	0.226695	0.203644	0.176305	0.146468	0.117062	0.088111	0.0602291	0.0331911	0.00890183	-0.0117499	-0.0275669	-0.0397707	-0.0513385	-0.0630217	-0.0751919	-0.0887809	-0.100041	-0.108743	-0.117616	-0.127958	-0.137189	-0.145974	-0.154453	-0.163005	-0.170514	-0.176752	-0.179057	-0.175024	-0.163368	-0.14376	-0.114759	-0.0782059	-0.0376476	0.00320631	0.0410454	0.0706419
-0.272208	-0.182608	0.0543341	0.155022	0.193968	0.21223	0.26055	0.270425	0.246269	0.221693	0.208534	0.20283	0.189096	0.156173	0.110071	0.0574673	0.00691683	-0.0396421	-0.0806132	-0.116446	-0.148539	-0.175161	-0.198639	-0.217674	-0.233724	-0.247565	-0.261574	-0.275214	-0.291292	-0.310271	-0.328481	-0.343696	-0.355402	-0.364671	-0.36976	-0.371941	-0.374395	-0.376806	-0.37847	-0.374547	-0.362258	-0.341534	-0.311214	-0.272307	-0.226234	-0.177099	-0.127146	-0.0783436	-0.0346954	0.00483385
-0.146218	-0.110455	0.0148989	0.150941	0.177421	0.193772	0.268462	0.329668	0.357098	0.383584	0.399211	0.403345	0.399676	0.377739	0.348788	0.313429	0.271476	0.224106	0.17692	0.134516	0.0993025	0.0711776	0.0514291	0.0361579	0.0234272	0.0120951	0.00068753	-0.0121422	-0.026817	-0.0445564	-0.0641138	-0.084242	-0.104994	-0.126005	-0.145264	-0.164415	-0.18105	-0.194457	-0.20497	-0.209812	-0.207348	-0.198317	-0.18239	-0.157378	-0.123085	-0.0851793	-0.0476699	-0.0151057	0.00957599	-0.00103279
-0.194162	-0.268134	-0.0674909	0.557756	1.04299	1.26137	1.51595	1.7491	1.85502	1.89514	1.90078	1.85198	1.77913	1.70225	1.6374	1.56722	1.49294	1.41729	1.34071	1.26511	1.19145	1.11781	1.04999	0.983707	0.920957	0.861609	0.800049	0.740018	0.688446	0.643939	0.600018	0.555333	0.55089	0.517995	0.47067	0.423427	0.37644	0.324512	0.253126	0.210316	0.171277	0.138325	0.110806	0.0915038	0.0824717	0.0872691	0.107909	0.143522	0.192387	0.250664
-0.205894	-0.328979	-0.271048	-0.0661758	0.0307728	0.0466326	0.183109	0.358221	0.472286	0.52796	0.528252	0.528126	0.54264	0.544369	0.535607	0.501112	0.466768	0.443707	0.414921	0.382179	0.344276	0.297693	0.249923	0.213777	0.188728	0.166445	0.140627	0.123983	0.110646	0.0913221	0.064	0.0400943	0.0297467	0.0265945	0.0110664	-0.0181146	-0.0501199	-0.05322	-0.0578533	-0.0829345	-0.102378	-0.133929	-0.150159	-0.135301	-0.0939995	-0.0472502	0.000102786	0.0489398	0.110883	0.169046
-0.284425	-0.248174	-0.104046	0.0843289	0.177155	0.268811	0.4257	0.535775	0.60354	0.65831	0.682106	0.682795	0.661738	0.631289	0.598038	0.556995	0.505319	0.442553	0.378568	0.318328	0.265711	0.220896	0.184069	0.153947	0.128619	0.105363	0.084046	0.0652339	0.0499571	0.0365728	0.0257974	0.0169574	0.009086	0.000780466	-0.00733774	-0.0145808	-0.0206598	-0.0258587	-0.0293843	-0.029189	-0.02321	-0.00838483	0.0155785	0.0481156	0.0899842	0.137577	0.188091	0.240412	0.290511	0.334939
-0.316001	-0.402443	-0.380146	-0.204327	-0.0891042	0.0191413	0.120311	0.192347	0.252424	0.298606	0.327366	0.347853	0.362946	0.366779	0.364073	0.35621	0.339213	0.311729	0.275008	0.233307	0.189084	0.146019	0.106207	0.0718945	0.0419292	0.0137119	-0.0136527	-0.0403631	-0.065485	-0.0879073	-0.108168	-0.128479	-0.14889	-0.168702	-0.188138	-0.208144	-0.22586	-0.2422	-0.258241	-0.275539	-0.29117	-0.305814	-0.318644	-0.327411	-0.330253	-0.324947	-0.309381	-0.28272	-0.24418	-0.196592
-0.209619	-0.281097	-0.259062	-0.0598089	0.136786	0.240007	0.341008	0.43143	0.490196	0.507371	0.500467	0.471113	0.435324	0.397644	0.356368	0.309949	0.260577	0.210107	0.161319	0.112271	0.067938	0.0293197	-0.00399217	-0.032053	-0.054578	-0.0738479	-0.0894947	-0.103088	-0.114116	-0.122735	-0.127931	-0.131242	-0.135562	-0.141001	-0.145987	-0.150539	-0.15464	-0.158206	-0.159706	-0.15798	-0.151623	-0.140478	-0.12269	-0.0982073	-0.0680758	-0.0326369	0.00683268	0.0489609	0.0802955	0.106229
0.103088	0.358007	0.780816	1.20209	1.45061	1.60767	1.82678	2.11284	2.24676	2.28436	2.27342	2.22011	2.12762	2.02006	1.9061	1.77864	1.62327	1.45905	1.30327	1.14015	0.996948	0.876522	0.775859	0.697313	0.633429	0.574214	0.513855	0.452118	0.38612	0.312511	0.230208	0.135323	0.0338155	-0.0591058	-0.135387	-0.198671	-0.252735	-0.29513	-0.324252	-0.342869	-0.353839	-0.357097	-0.353166	-0.339643	-0.314059	-0.277436	-0.231036	-0.176298	-0.11784	-0.0628717
-0.31648	-0.322036	-0.198613	0.0132235	0.128177	0.168155	0.227621	0.275612	0.312427	0.326633	0.322673	0.303834	0.284027	0.270942	0.260686	0.247177	0.228502	0.205399	0.178361	0.149676	0.121438	0.0958132	0.0715329	0.0481066	0.0256929	0.00512569	-0.01354	-0.0298093	-0.0446915	-0.058762	-0.0716113	-0.0835724	-0.0950325	-0.107207	-0.117865	-0.126885	-0.134565	-0.139455	-0.144591	-0.142356	-0.135442	-0.122618	-0.102523	-0.0741526	-0.0375605	0.00609206	0.0528804	0.0980584	0.134568	0.157334
-0.423135	-0.640648	-0.60674	-0.183736	0.0715033	0.0379824	0.0842791	0.221851	0.26542	0.293736	0.321114	0.341327	0.354013	0.358603	0.351824	0.332803	0.299891	0.259548	0.219583	0.179619	0.142181	0.110671	0.085025	0.0633089	0.0435911	0.0271395	0.0120437	-0.00162494	-0.0154817	-0.0295567	-0.0457201	-0.063852	-0.0835207	-0.104524	-0.127138	-0.149867	-0.172392	-0.191866	-0.207549	-0.219963	-0.22758	-0.227941	-0.222428	-0.207756	-0.181656	-0.143079	-0.0947172	-0.0421459	0.00876688	0.0561866
-0.217163	-0.338736	-0.280353	0.0439154	0.182339	0.192393	0.284213	0.355921	0.360176	0.394875	0.400127	0.374623	0.341847	0.32675	0.321374	0.327322	0.325659	0.313141	0.29248	0.266107	0.237474	0.208416	0.182059	0.158647	0.136161	0.113956	0.0921787	0.0708471	0.050062	0.0283541	0.00607864	-0.0166981	-0.0396387	-0.0643442	-0.0915652	-0.123323	-0.15586	-0.187681	-0.216581	-0.243327	-0.266674	-0.283206	-0.290826	-0.291716	-0.282034	-0.261776	-0.232418	-0.195553	-0.152605	-0.106042
-0.149157	-0.119452	-0.0354903	0.1076	0.204599	0.252709	0.30022	0.346071	0.358704	0.360784	0.352255	0.341068	0.328874	0.312373	0.287356	0.249411	0.20827	0.168204	0.12914	0.094351	0.0657877	0.0419282	0.0209429	0.00115972	-0.017478	-0.0349717	-0.0513786	-0.0653808	-0.0765103	-0.0845829	-0.091	-0.097077	-0.105054	-0.113608	-0.122404	-0.131255	-0.140346	-0.149528	-0.156921	-0.162582	-0.166031	-0.165802	-0.160863	-0.150787	-0.135116	-0.113719	-0.0869787	-0.0568883	-0.0229105	0.0115482
-0.270523	-0.242436	-0.343538	-0.31263	-0.0456284	0.172577	0.307852	0.437238	0.563329	0.6273	0.655485	0.646876	0.617861	0.566607	0.504029	0.428696	0.345873	0.262818	0.185206	0.114251	0.0527448	0.00299599	-0.0358353	-0.0661379	-0.0884322	-0.103578	-0.112666	-0.11579	-0.115712	-0.113385	-0.109949	-0.106184	-0.103769	-0.102457	-0.102862	-0.10437	-0.105245	-0.104327	-0.100166	-0.0931523	-0.0856083	-0.0769485	-0.0647657	-0.0471392	-0.0248482	0.00211795	0.0297025	0.0556587	0.0780278	0.0972203
-0.323067	-0.381786	-0.277238	-0.0718118	0.0193807	0.09614	0.151906	0.224587	0.289283	0.297495	0.264127	0.231645	0.218945	0.206991	0.186115	0.162215	0.127428	0.0814673	0.0360037	-0.00911164	-0.0509103	-0.0873579	-0.118388	-0.142446	-0.160071	-0.172546	-0.18065	-0.186017	-0.19054	-0.19588	-0.205122	-0.220743	-0.241985	-0.266283	-0.286799	-0.303373	-0.319179	-0.332158	-0.341129	-0.344786	-0.343703	-0.335076	-0.31791	-0.29073	-0.255011	-0.212425	-0.16612	-0.119558	-0.0775557	-0.0422635
-0.212617	-0.187663	-0.013086	0.165239	0.239099	0.29724	0.356553	0.415345	0.45384	0.45298	0.437652	0.421087	0.407532	0.395118	0.364894	0.325219	0.282834	0.2382	0.196103	0.157345	0.12247	0.0921771	0.0655166	0.0408265	0.0198706	0.00187048	-0.0147175	-0.0313097	-0.0460177	-0.0592015	-0.0714207	-0.0819408	-0.092291	-0.103959	-0.116571	-0.128687	-0.136	-0.135558	-0.138204	-0.142626	-0.134741	-0.123352	-0.105166	-0.079035	-0.0466024	-0.00875709	0.0331745	0.0773725	0.119905	0.151055
-0.391658	-0.356759	-0.0705053	0.106085	0.149799	0.288533	0.429487	0.546142	0.634285	0.701949	0.74239	0.761125	0.766765	0.748458	0.710221	0.659666	0.599943	0.534459	0.467676	0.400279	0.333216	0.266957	0.203727	0.146244	0.0960441	0.0535581	0.0189384	-0.008207	-0.0289427	-0.0432056	-0.0524159	-0.059136	-0.0666797	-0.0761743	-0.0872389	-0.100953	-0.114222	-0.124264	-0.132704	-0.13904	-0.141537	-0.139342	-0.129352	-0.110099	-0.0815838	-0.0432432	0.00273102	0.0522151	0.0977022	0.132333
-0.34213	-0.392221	-0.247472	-0.0203779	0.113307	0.147431	0.217844	0.274662	0.315734	0.33788	0.335908	0.32091	0.303178	0.285367	0.266476	0.242076	0.21215	0.180035	0.150486	0.125102	0.102789	0.0829509	0.0643239	0.0462819	0.0288673	0.011488	-0.00622648	-0.0251721	-0.0447008	-0.0641047	-0.0825368	-0.102572	-0.123744	-0.144464	-0.164815	-0.187121	-0.210503	-0.231012	-0.246038	-0.254478	-0.255981	-0.249566	-0.235581	-0.211967	-0.178063	-0.135758	-0.0880452	-0.0385212	0.009576	0.0520708
-0.321213	-0.245313	0.0316992	0.12612	0.182789	0.286601	0.348179	0.37551	0.414632	0.421143	0.40049	0.372103	0.336395	0.294709	0.249096	0.197033	0.143998	0.092937	0.0453037	0.00201219	-0.0366774	-0.0703191	-0.0997096	-0.125037	-0.146404	-0.164625	-0.180264	-0.193141	-0.204529	-0.213168	-0.22077	-0.226459	-0.230806	-0.235022	-0.238564	-0.241827	-0.24558	-0.249507	-0.253464	-0.255332	-0.253812	-0.246332	-0.231887	-0.210403	-0.177879	-0.133931	-0.0810237	-0.0219457	0.039805	0.0996293
-0.411122	-0.527711	-0.440569	-0.213881	-0.0961621	-0.114251	-0.0432778	0.0294843	0.0731652	0.086367	0.101588	0.116266	0.118705	0.0981824	0.0593577	0.0224799	-0.0109787	-0.0423636	-0.0688653	-0.0899687	-0.103864	-0.110967	-0.113181	-0.115894	-0.125909	-0.14133	-0.154043	-0.151997	-0.137821	-0.137438	-0.161145	-0.182499	-0.187688	-0.189067	-0.197938	-0.215347	-0.229452	-0.237368	-0.243005	-0.245991	-0.244635	-0.241009	-0.230561	-0.206233	-0.169471	-0.12389	-0.0731703	-0.0214586	0.0282823	0.0745497
-0.215779	-0.183345	0.102698	0.400567	0.528597	0.65308	0.74516	0.775815	0.756105	0.692904	0.619122	0.537527	0.446204	0.347999	0.246269	0.157026	0.0839165	0.0228853	-0.0257107	-0.0609042	-0.0813402	-0.0925871	-0.0978666	-0.0981	-0.0945917	-0.0853682	-0.0767597	-0.0660999	-0.0549546	-0.0448052	-0.0331591	-0.0252753	-0.0213738	-0.0185707	-0.0170839	-0.0190987	-0.0214275	-0.024797	-0.0315801	-0.0407407	-0.051291	-0.0607302	-0.0666674	-0.0649246	-0.0508609	-0.0247193	0.00974349	0.0490386	0.0899697	0.129089
-0.212418	-0.457621	-0.389179	0.0401381	0.277648	0.216337	0.215717	0.303743	0.365083	0.390164	0.388164	0.387628	0.377921	0.356321	0.327879	0.296676	0.259739	0.217497	0.16826	0.119473	0.0768722	0.0393775	0.00554583	-0.0238598	-0.0453761	-0.0637213	-0.0807021	-0.0930564	-0.101879	-0.108245	-0.112574	-0.115487	-0.117034	-0.116412	-0.117251	-0.116574	-0.11683	-0.11735	-0.117814	-0.118416	-0.119146	-0.117268	-0.110518	-0.0956116	-0.0703624	-0.0344269	0.00906109	0.0568385	0.105287	0.14704
-0.251007	-0.311546	-0.288701	-0.0910502	-0.00593957	0.0376981	0.116279	0.165572	0.191492	0.190821	0.204546	0.207423	0.182036	0.147679	0.114842	0.0776844	0.0344804	-0.00909808	-0.0477372	-0.080988	-0.107925	-0.12776	-0.144144	-0.158709	-0.171646	-0.183421	-0.194451	-0.204148	-0.212477	-0.219811	-0.225748	-0.230324	-0.232727	-0.235551	-0.23943	-0.241879	-0.243211	-0.245751	-0.249518	-0.252582	-0.254434	-0.254158	-0.249648	-0.239365	-0.222712	-0.200036	-0.172001	-0.142163	-0.115062	-0.0934017
-0.347584	-0.403707	-0.160873	0.116712	0.208905	0.221101	0.28907	0.359803	0.383378	0.398476	0.39391	0.379099	0.368992	0.361264	0.352345	0.341069	0.324036	0.299293	0.269288	0.238317	0.209277	0.184905	0.166399	0.149822	0.13177	0.113347	0.0961013	0.0787338	0.0610054	0.042252	0.0226246	0.0035016	-0.014819	-0.031902	-0.0469655	-0.0590916	-0.0690085	-0.0763261	-0.0804099	-0.0816654	-0.0782614	-0.0711448	-0.0587348	-0.0426837	-0.0202635	0.00790068	0.0412337	0.0779909	0.117282	0.159327
-0.180748	-0.225288	-0.251213	-0.126385	0.0346154	0.103784	0.175913	0.260628	0.32367	0.362024	0.363761	0.346362	0.307387	0.269263	0.240055	0.193778	0.142443	0.106199	0.0738002	0.0456838	0.018331	-0.0117299	-0.0467748	-0.0791711	-0.0978933	-0.111542	-0.124724	-0.143972	-0.169271	-0.19115	-0.202852	-0.221568	-0.244369	-0.259766	-0.279326	-0.297778	-0.314588	-0.333639	-0.349558	-0.368539	-0.386951	-0.384002	-0.380339	-0.360425	-0.327722	-0.311966	-0.278967	-0.23066	-0.181436	-0.128747
-0.368266	-0.431005	-0.220118	0.0122117	0.138777	0.261826	0.377046	0.441158	0.495616	0.516023	0.516473	0.502202	0.471809	0.436883	0.404519	0.375706	0.351692	0.330412	0.310457	0.290737	0.270585	0.248823	0.226266	0.205135	0.186812	0.169939	0.154745	0.143017	0.13169	0.119303	0.104813	0.0890156	0.0727665	0.0585522	0.0471374	0.0390009	0.0334329	0.0305825	0.0303137	0.0316281	0.0332277	0.0327457	0.0312333	0.030962	0.0339953	0.0402295	0.0511548	0.0664616	0.0855742	0.107687
-0.424626	-0.453769	-0.346091	-0.134219	0.0228156	0.0681543	0.118761	0.201352	0.245454	0.265421	0.276324	0.280957	0.276449	0.263843	0.251416	0.239496	0.226369	0.208465	0.186671	0.162621	0.137232	0.110977	0.0843141	0.0589666	0.0346764	0.0114042	-0.0136711	-0.0415329	-0.0698164	-0.0991753	-0.130024	-0.161436	-0.192878	-0.223494	-0.252044	-0.278265	-0.301402	-0.319101	-0.331024	-0.337164	-0.335616	-0.326778	-0.309275	-0.283901	-0.252853	-0.217109	-0.179711	-0.142648	-0.10071	-0.0647957
-0.464405	-0.524932	-0.203049	0.115037	0.216858	0.245832	0.328991	0.435676	0.542366	0.596773	0.623243	0.643113	0.655342	0.659592	0.650454	0.618566	0.568159	0.511563	0.457597	0.4072	0.35935	0.31391	0.271019	0.230593	0.194442	0.163183	0.137668	0.117976	0.100169	0.0826208	0.0652756	0.0482995	0.0330342	0.0199522	0.008369	-0.00294314	-0.0144269	-0.0257991	-0.0352838	-0.0424292	-0.0475198	-0.0479758	-0.0416609	-0.0303049	-0.0155125	0.00687999	0.0412224	0.0876861	0.140162	0.189501
-0.401808	-0.373653	-0.173139	0.0786985	0.259008	0.39961	0.499858	0.599043	0.656398	0.671361	0.649692	0.607043	0.562904	0.515605	0.469151	0.426359	0.382302	0.334843	0.284531	0.233015	0.182238	0.135402	0.0927133	0.0558631	0.0235923	-0.00727858	-0.0357218	-0.0579159	-0.0748194	-0.0892758	-0.101459	-0.11317	-0.127779	-0.144449	-0.162311	-0.179812	-0.196955	-0.215859	-0.234115	-0.248208	-0.256078	-0.256918	-0.24715	-0.226892	-0.199302	-0.165469	-0.125833	-0.0834856	-0.03855	0.00630878
-0.10361	-0.0889056	-0.0291649	0.169969	0.324632	0.272404	0.298396	0.355478	0.364512	0.382393	0.397862	0.413354	0.423061	0.424252	0.423248	0.413744	0.396281	0.374467	0.348137	0.319301	0.285896	0.250688	0.215578	0.182292	0.152337	0.124632	0.0985457	0.0733017	0.0498441	0.0298326	0.0140993	0.000727275	-0.0153656	-0.0333666	-0.0531121	-0.0760779	-0.101183	-0.124752	-0.143737	-0.157171	-0.162956	-0.161631	-0.152953	-0.132989	-0.100729	-0.0572719	-0.0032981	0.0562779	0.116671	0.174894
-0.269642	-0.307316	-0.153354	0.146339	0.241763	0.244622	0.330345	0.437984	0.483845	0.494501	0.514908	0.518192	0.511551	0.494992	0.4575	0.404265	0.338434	0.267529	0.198942	0.135571	0.0795152	0.0327735	-0.00512225	-0.0381895	-0.0680417	-0.0932684	-0.114086	-0.129931	-0.141232	-0.147795	-0.149414	-0.147352	-0.142454	-0.136924	-0.131629	-0.126561	-0.119955	-0.110809	-0.0980368	-0.0814481	-0.0609683	-0.0359893	-0.00438195	0.0345648	0.0786253	0.127074	0.179743	0.23557	0.291728	0.344641
-0.197287	-0.114895	-0.138364	-0.106835	0.0380747	0.150326	0.210689	0.331861	0.476131	0.533416	0.55282	0.556974	0.556593	0.546601	0.498889	0.458072	0.419626	0.384535	0.34813	0.296187	0.242064	0.178494	0.12705	0.0908164	0.0588531	0.0343532	0.0191322	-0.0183786	-0.0424299	-0.0593548	-0.0676451	-0.0887405	-0.106864	-0.12038	-0.137316	-0.163001	-0.174557	-0.186869	-0.208319	-0.220089	-0.215742	-0.207104	-0.185128	-0.160486	-0.130001	-0.0819657	-0.0317115	0.0210506	0.0725784	0.11745
-0.244877	-0.197245	-0.0419723	0.0954784	-0.0228727	-0.00560554	0.0984367	0.198599	0.282492	0.326059	0.363446	0.397078	0.403703	0.409558	0.407768	0.390704	0.358817	0.305626	0.244181	0.19165	0.150707	0.115815	0.0883268	0.0607284	0.0282528	-0.00345246	-0.0372773	-0.0701593	-0.0940079	-0.108231	-0.125786	-0.150943	-0.170507	-0.191315	-0.222904	-0.248818	-0.268545	-0.282112	-0.291465	-0.303212	-0.319122	-0.334713	-0.338128	-0.321068	-0.28534	-0.242822	-0.197179	-0.148194	-0.089492	-0.0316721
-0.361056	-0.402827	-0.401364	-0.205605	0.0567896	0.231631	0.393401	0.592416	0.710464	0.797309	0.856081	0.882122	0.877257	0.849428	0.804908	0.750543	0.692069	0.63359	0.56856	0.499073	0.427985	0.358456	0.293006	0.2351	0.184737	0.138861	0.0965337	0.0587524	0.0275735	0.00122516	-0.0224272	-0.0446642	-0.0676429	-0.0939925	-0.122875	-0.151618	-0.180406	-0.209302	-0.238043	-0.265658	-0.292075	-0.311375	-0.3175	-0.309672	-0.287073	-0.249791	-0.201851	-0.14822	-0.0930819	-0.0367305
-0.298466	-0.281565	-0.00706825	0.247672	0.268557	0.276789	0.386579	0.46772	0.516547	0.56071	0.565014	0.550234	0.531053	0.501392	0.459884	0.408124	0.356314	0.308399	0.262207	0.222097	0.190664	0.161918	0.13429	0.108085	0.08243	0.0573458	0.032765	0.0083798	-0.0147628	-0.0366483	-0.0602783	-0.0896915	-0.12524	-0.16416	-0.202813	-0.240844	-0.275583	-0.302395	-0.319095	-0.323058	-0.31391	-0.291336	-0.252632	-0.199508	-0.137035	-0.0703965	-0.00532913	0.0559936	0.108843	0.148791
-0.263793	-0.36614	-0.320401	-0.057691	0.10154	0.163473	0.233287	0.363787	0.479201	0.563008	0.621087	0.653365	0.665165	0.664767	0.658095	0.637943	0.607135	0.567608	0.522036	0.475563	0.431418	0.388275	0.345997	0.305001	0.266574	0.231871	0.197409	0.164085	0.133472	0.105893	0.0812762	0.0580928	0.0332091	0.00737379	-0.0197863	-0.0437414	-0.064381	-0.0795006	-0.0883289	-0.0902005	-0.0850409	-0.072112	-0.0522024	-0.0250537	0.0104093	0.0512848	0.0940477	0.135024	0.171991	0.204183
-0.452872	-0.56398	-0.214486	0.117133	0.133301	0.168143	0.252858	0.301666	0.329825	0.325259	0.314897	0.321425	0.333625	0.337108	0.326561	0.301908	0.267344	0.22935	0.193804	0.15959	0.124029	0.0883421	0.0563367	0.0295218	0.00619773	-0.0159969	-0.0386031	-0.0610352	-0.0819814	-0.102705	-0.121742	-0.13729	-0.152268	-0.168429	-0.185918	-0.202203	-0.217882	-0.234895	-0.250451	-0.262536	-0.268454	-0.266644	-0.253335	-0.225087	-0.18277	-0.129235	-0.0693129	-0.00697203	0.053743	0.108276
-0.314549	-0.465293	-0.314699	-0.117701	-0.111285	-0.0423897	0.0555305	0.133535	0.177236	0.194283	0.200226	0.202286	0.201576	0.2013	0.200989	0.197212	0.18214	0.158416	0.131892	0.105491	0.0806272	0.0578302	0.0363289	0.0172324	-0.00286327	-0.027512	-0.0560884	-0.0870847	-0.118972	-0.149939	-0.178465	-0.205695	-0.230535	-0.252491	-0.271855	-0.289561	-0.306781	-0.326023	-0.34602	-0.364028	-0.377601	-0.384731	-0.382917	-0.373983	-0.35507	-0.327182	-0.291449	-0.248251	-0.198531	-0.142832
[truncated: 11 more columns]

## Sheet: 2
0.0454	0.116671	0.202854	0.288724	0.370576	0.451132	0.530842	0.602277	0.661398	0.701109	0.716997	0.711144	0.685158	0.638676	0.574549	0.498839	0.417525	0.334646	0.255155	0.179883	0.111913	0.0538455	0.00936667	-0.0231869	-0.0419	-0.0496071	-0.0565202	-0.0679818	-0.0862758	-0.109364	-0.130815	-0.147035	-0.159008	-0.1686	-0.17689	-0.182924	-0.184891	-0.182858	-0.17878	-0.176764	-0.17721	-0.179408	-0.180455	-0.175283	-0.158911	-0.132245	-0.096596	-0.0557232	-0.00985455	0.0402727
0.01892	0.074263	0.132792	0.195972	0.263575	0.331128	0.385732	0.424401	0.448454	0.459265	0.45663	0.43956	0.407567	0.360966	0.302797	0.235428	0.162425	0.0887859	0.0202945	-0.0374517	-0.0798089	-0.107398	-0.124867	-0.13715	-0.148933	-0.16553	-0.186643	-0.209469	-0.231131	-0.250546	-0.267828	-0.282359	-0.29291	-0.299653	-0.301755	-0.302262	-0.303647	-0.305767	-0.307168	-0.305941	-0.298393	-0.280196	-0.249926	-0.207916	-0.154093	-0.0929091	-0.0322525	0.0293798	0.0916958	0.153276
0.0939592	0.144046	0.196534	0.252824	0.313664	0.377096	0.435236	0.48034	0.508086	0.516451	0.502932	0.469327	0.420699	0.364105	0.304316	0.244301	0.183991	0.123872	0.066243	0.0142121	-0.0304174	-0.066953	-0.0980998	-0.127511	-0.15664	-0.18394	-0.206259	-0.221722	-0.231443	-0.238763	-0.248652	-0.263228	-0.281565	-0.302707	-0.326401	-0.352064	-0.378839	-0.404205	-0.427298	-0.443171	-0.448581	-0.443198	-0.427317	-0.401766	-0.369363	-0.33215	-0.290923	-0.244998	-0.193779	-0.138418
0.0920328	0.107721	0.134588	0.174301	0.227953	0.290875	0.348728	0.394242	0.425126	0.43721	0.429853	0.405268	0.364588	0.314741	0.265433	0.219656	0.184495	0.161135	0.145903	0.133627	0.118728	0.0972876	0.0682423	0.0330045	-0.00611773	-0.0463916	-0.0843164	-0.116484	-0.141964	-0.161546	-0.175842	-0.188665	-0.204973	-0.225951	-0.252697	-0.283866	-0.316133	-0.346662	-0.372024	-0.388769	-0.393317	-0.383366	-0.356566	-0.314761	-0.261208	-0.201343	-0.140729	-0.0825739	-0.0276602	0.0230682
0.125955	0.160539	0.199384	0.251421	0.315458	0.382868	0.445774	0.500575	0.541661	0.557475	0.538921	0.483495	0.40235	0.310508	0.219372	0.135857	0.0634412	0.00352342	-0.0441901	-0.0836584	-0.121663	-0.164733	-0.214157	-0.262826	-0.301944	-0.330505	-0.351342	-0.366388	-0.374629	-0.374734	-0.371515	-0.374328	-0.38704	-0.404712	-0.421606	-0.435216	-0.44493	-0.449895	-0.451593	-0.452205	-0.45115	-0.447939	-0.442077	-0.430334	-0.405323	-0.362843	-0.305755	-0.240474	-0.174964	-0.114797
0.0502791	0.100831	0.151404	0.202863	0.255968	0.309047	0.357466	0.39628	0.423977	0.441717	0.449585	0.446478	0.432502	0.409049	0.379167	0.345023	0.306944	0.266699	0.2266	0.189133	0.156193	0.129834	0.110132	0.0939596	0.0766582	0.0542001	0.025347	-0.00694503	-0.0396404	-0.0708569	-0.0998457	-0.126289	-0.149569	-0.169705	-0.18749	-0.203715	-0.218683	-0.232846	-0.245261	-0.254054	-0.257175	-0.252926	-0.238992	-0.214759	-0.180385	-0.136609	-0.0849291	-0.0287113	0.0290585	0.0843728
-0.0595	-0.0267424	0.020298	0.0755758	0.132646	0.187086	0.233742	0.273308	0.311096	0.342955	0.361576	0.368333	0.365742	0.351152	0.327662	0.296409	0.256116	0.212641	0.173909	0.137177	0.103308	0.0765455	0.0541111	0.031601	0.00831818	-0.0173283	-0.0527525	-0.0907727	-0.12654	-0.157848	-0.179455	-0.189742	-0.192086	-0.189333	-0.183763	-0.180283	-0.183591	-0.189561	-0.199742	-0.210409	-0.214268	-0.219005	-0.22603	-0.22898	-0.229722	-0.2295	-0.227803	-0.218197	-0.204227	-0.183081
0.0610577	0.0760379	0.0925095	0.117449	0.152853	0.19909	0.249291	0.29636	0.331923	0.350215	0.350327	0.33435	0.306884	0.276448	0.252262	0.239348	0.236717	0.238906	0.238383	0.229884	0.21163	0.185053	0.156406	0.132877	0.11822	0.112391	0.111791	0.11133	0.107302	0.0976037	0.0812383	0.0588442	0.0335375	0.00937179	-0.00979545	-0.0225662	-0.0300874	-0.0346179	-0.0391494	-0.045433	-0.0534425	-0.0615204	-0.0656649	-0.0624837	-0.0498056	-0.0273811	0.00182576	0.0347904	0.0682826	0.0977704
0.111224	0.16201	0.21185	0.260956	0.308498	0.350789	0.385032	0.407579	0.414356	0.411151	0.399911	0.37657	0.342626	0.300722	0.253428	0.207424	0.163929	0.122281	0.0810054	0.0381744	-0.00536183	-0.04618	-0.0812123	-0.10839	-0.127156	-0.140276	-0.1512	-0.163862	-0.180799	-0.199992	-0.219085	-0.23631	-0.251358	-0.26595	-0.280019	-0.292141	-0.299318	-0.298972	-0.290877	-0.275242	-0.253476	-0.22618	-0.193811	-0.157479	-0.118149	-0.0747313	-0.0265536	0.0281791	0.0861275	0.141147
0.0225714	0.0356811	0.0628081	0.0985974	0.132091	0.159975	0.187121	0.216517	0.242371	0.251844	0.238853	0.210683	0.171775	0.131971	0.0966335	0.067342	0.0393867	0.0126811	-0.0117273	-0.0319134	-0.0512439	-0.0744199	-0.104127	-0.137374	-0.170316	-0.202857	-0.234188	-0.265779	-0.292932	-0.310924	-0.323268	-0.337026	-0.352595	-0.36919	-0.382582	-0.388964	-0.388883	-0.385636	-0.382061	-0.375879	-0.361472	-0.337618	-0.30503	-0.26354	-0.213238	-0.153545	-0.0855758	-0.0138571	0.0508745	0.0992453
0.0385208	0.0568136	0.0714994	0.0874268	0.110987	0.148541	0.197867	0.243859	0.271352	0.272727	0.24936	0.206919	0.153532	0.0936145	0.0314493	-0.033596	-0.0900204	-0.126187	-0.142239	-0.144723	-0.141245	-0.140162	-0.146734	-0.163391	-0.189234	-0.221195	-0.253207	-0.278657	-0.292088	-0.29323	-0.287274	-0.282485	-0.284424	-0.293757	-0.309646	-0.329343	-0.35061	-0.371618	-0.388984	-0.397884	-0.395885	-0.382653	-0.36036	-0.332544	-0.302755	-0.272051	-0.23953	-0.202852	-0.159789	-0.109136
-0.0657188	-0.0582566	-0.0571064	-0.0540871	-0.0359482	0.00965909	0.0630568	0.114353	0.147025	0.156645	0.152109	0.137146	0.116076	0.0888722	0.0556023	0.0179706	-0.0196547	-0.0541297	-0.0851591	-0.114181	-0.143843	-0.174553	-0.204521	-0.230613	-0.248575	-0.258632	-0.26334	-0.269182	-0.281635	-0.301641	-0.326625	-0.352556	-0.377632	-0.401802	-0.42558	-0.448554	-0.468435	-0.484274	-0.494013	-0.496519	-0.491377	-0.480304	-0.461204	-0.432698	-0.396455	-0.35431	-0.308423	-0.256182	-0.190306	-0.110073
-0.17775	-0.130543	-0.0760404	0.0129697	0.121629	0.226348	0.334288	0.467982	0.625008	0.769932	0.871058	0.927083	0.953598	0.955427	0.924705	0.864598	0.786616	0.696298	0.615409	0.480013	0.363798	0.259553	0.178083	0.114952	0.0587045	0.00762374	-0.0290985	-0.0506364	-0.0684167	-0.0885278	-0.108098	-0.124253	-0.137859	-0.151083	-0.162131	-0.17	-0.179568	-0.193851	-0.211439	-0.232826	-0.258063	-0.283528	-0.313083	-0.347869	-0.373417	-0.385977	-0.382157	-0.363295	-0.333265	-0.295003
0.0448235	0.101312	0.177098	0.279615	0.405036	0.538917	0.660659	0.753572	0.813891	0.842388	0.83731	0.796768	0.728289	0.649552	0.57811	0.519461	0.471545	0.424547	0.373305	0.318135	0.263869	0.214981	0.174065	0.142216	0.121229	0.111257	0.109429	0.110203	0.108225	0.101239	0.0900241	0.0735253	0.0531619	0.0332843	0.0188553	0.0118434	0.0115642	0.0148476	0.0177323	0.0182602	0.0173467	0.0176673	0.0223467	0.0344031	0.0567712	0.0906604	0.133881	0.180976	0.224623	0.258024
-0.046878	0.0088778	0.0788955	0.165065	0.264474	0.3682	0.462637	0.536205	0.586027	0.616973	0.633232	0.635393	0.624043	0.602513	0.575503	0.545076	0.509833	0.468387	0.419805	0.364304	0.305862	0.249647	0.198992	0.154612	0.115516	0.0820515	0.0544294	0.0303991	0.00609707	-0.0217194	-0.0538418	-0.087658	-0.119706	-0.149553	-0.176756	-0.200261	-0.219386	-0.234719	-0.246681	-0.255863	-0.263061	-0.268957	-0.272144	-0.267404	-0.249477	-0.217951	-0.17456	-0.123436	-0.0653459	0.000883222
0.0845591	0.14299	0.198764	0.260966	0.33641	0.423597	0.508399	0.574201	0.616663	0.640336	0.648123	0.639071	0.610694	0.563748	0.50508	0.443371	0.383927	0.327998	0.274007	0.220805	0.16993	0.125152	0.0885302	0.0585585	0.0308945	0.00231027	-0.0259311	-0.0505841	-0.0706516	-0.0880641	-0.106033	-0.125233	-0.143643	-0.158706	-0.169503	-0.176631	-0.18066	-0.181203	-0.176502	-0.165075	-0.146538	-0.121804	-0.0919141	-0.057856	-0.0197804	0.0222591	0.0671693	0.114231	0.162119	0.207473
0.122095	0.20851	0.299464	0.392517	0.484022	0.567229	0.633714	0.679684	0.708388	0.720762	0.712876	0.680624	0.626287	0.559578	0.492074	0.427444	0.362798	0.295607	0.227043	0.163186	0.107883	0.0632886	0.0269048	-0.00585233	-0.0372367	-0.0678062	-0.0948105	-0.118355	-0.140522	-0.162479	-0.182781	-0.199787	-0.214606	-0.230333	-0.248833	-0.266283	-0.28103	-0.292524	-0.300516	-0.304491	-0.303547	-0.296277	-0.278775	-0.247931	-0.202693	-0.14768	-0.0891611	-0.0317629	0.0234791	0.0753949
0.0104516	0.0360101	0.0540469	0.0736012	0.103651	0.151337	0.209534	0.264522	0.308087	0.33707	0.350681	0.346638	0.322031	0.273314	0.202762	0.120915	0.0389602	-0.0349179	-0.0966862	-0.146771	-0.186019	-0.214598	-0.231978	-0.239452	-0.240718	-0.244793	-0.260253	-0.288135	-0.323986	-0.360016	-0.387842	-0.404546	-0.413339	-0.418	-0.419905	-0.420826	-0.421915	-0.424425	-0.42961	-0.436068	-0.440429	-0.438977	-0.427111	-0.402719	-0.365057	-0.316035	-0.25709	-0.190429	-0.11584	-0.0378882
0.0689067	0.125971	0.192248	0.268053	0.348239	0.427146	0.495195	0.544042	0.575799	0.590002	0.586496	0.563332	0.522069	0.468757	0.409187	0.346739	0.283019	0.217582	0.154623	0.0966272	0.0471837	0.00812525	-0.0234993	-0.0518597	-0.0802853	-0.109318	-0.136709	-0.160645	-0.182408	-0.205019	-0.230395	-0.256687	-0.281363	-0.304529	-0.327711	-0.351704	-0.375777	-0.397982	-0.415624	-0.426282	-0.428745	-0.421644	-0.404956	-0.378972	-0.343993	-0.30099	-0.25124	-0.19384	-0.12814	-0.0570338
-0.00555882	0.0276441	0.0637929	0.115888	0.184114	0.254751	0.308411	0.332389	0.330441	0.317711	0.299129	0.26835	0.218222	0.150316	0.0732353	-0.00261408	-0.0704355	-0.133811	-0.193286	-0.242719	-0.280614	-0.309371	-0.331895	-0.354792	-0.378652	-0.400177	-0.416843	-0.429848	-0.443318	-0.460825	-0.480989	-0.500552	-0.517953	-0.535069	-0.554689	-0.575248	-0.594235	-0.608439	-0.615084	-0.614113	-0.605936	-0.588618	-0.559351	-0.517034	-0.460729	-0.391487	-0.312693	-0.226465	-0.133542	-0.0364522
-0.0391875	-0.0143608	0.0151982	0.0580653	0.119957	0.205024	0.295532	0.373946	0.434424	0.473991	0.494419	0.496333	0.477538	0.433747	0.368241	0.290755	0.212913	0.14359	0.0857869	0.0364861	-0.00710606	-0.0463722	-0.082066	-0.114389	-0.143946	-0.172642	-0.202766	-0.234162	-0.264958	-0.292186	-0.314851	-0.333753	-0.350063	-0.364427	-0.376765	-0.387471	-0.395741	-0.401743	-0.405537	-0.407006	-0.40374	-0.392059	-0.369893	-0.33583	-0.288319	-0.229287	-0.162065	-0.091756	-0.0234157	0.0390843
-0.0368889	-0.0102907	0.0113962	0.0483277	0.118561	0.218493	0.325103	0.413628	0.472767	0.503869	0.510722	0.493403	0.45329	0.400729	0.349287	0.30793	0.275442	0.244871	0.209687	0.167829	0.119618	0.066147	0.00919342	-0.0465758	-0.0942413	-0.128608	-0.149901	-0.164088	-0.178263	-0.19693	-0.221208	-0.24995	-0.28227	-0.317198	-0.351405	-0.37961	-0.39568	-0.398538	-0.39052	-0.377893	-0.36507	-0.351852	-0.335238	-0.311426	-0.279095	-0.2377	-0.188168	-0.132522	-0.0688406	-0.00874448
-0.08325	-0.0411747	0.0131247	0.0938682	0.199239	0.307629	0.397586	0.461729	0.500763	0.5139	0.502699	0.47355	0.434814	0.39386	0.353641	0.311847	0.264939	0.212745	0.158018	0.103939	0.052497	0.00627273	-0.0319667	-0.0651909	-0.097653	-0.130229	-0.162112	-0.193277	-0.225574	-0.257645	-0.286979	-0.312936	-0.336806	-0.360433	-0.386168	-0.413121	-0.438077	-0.458321	-0.472061	-0.478068	-0.475316	-0.463484	-0.444144	-0.416583	-0.379233	-0.331823	-0.276993	-0.217038	-0.14998	-0.0784747
-0.06476	-0.0393414	-0.00446734	0.054444	0.141337	0.240691	0.328918	0.391362	0.427162	0.441074	0.435418	0.411422	0.37449	0.3333	0.294391	0.257905	0.218785	0.171845	0.117143	0.0594614	0.00423232	-0.0451907	-0.0884074	-0.123947	-0.152339	-0.176185	-0.202126	-0.234429	-0.272265	-0.312904	-0.353771	-0.394004	-0.432284	-0.465498	-0.49326	-0.51668	-0.538201	-0.559698	-0.580341	-0.596433	-0.603189	-0.597237	-0.576632	-0.540002	-0.487576	-0.421228	-0.345131	-0.26422	-0.182239	-0.102508
-0.0350256	0.0146488	0.0728304	0.148077	0.246595	0.35884	0.465422	0.550613	0.611082	0.651077	0.671492	0.669707	0.647071	0.61007	0.565793	0.5185	0.467982	0.412512	0.351678	0.287269	0.223408	0.165496	0.115661	0.0751018	0.0413838	0.0101269	-0.0208845	-0.0510303	-0.0784815	-0.10395	-0.130312	-0.158542	-0.186907	-0.213735	-0.238955	-0.264185	-0.291779	-0.322414	-0.353531	-0.381782	-0.404045	-0.417887	-0.42212	-0.415643	-0.39694	-0.366389	-0.324235	-0.270029	-0.206087	-0.135625
0.00692593	0.0647013	0.125782	0.188432	0.24971	0.307329	0.356168	0.389348	0.403647	0.400238	0.381568	0.351436	0.311864	0.266155	0.218655	0.169942	0.123568	0.0787028	0.0333311	-0.0159249	-0.0633606	-0.107471	-0.147126	-0.181516	-0.210187	-0.23312	-0.251398	-0.266538	-0.281024	-0.297486	-0.317377	-0.340143	-0.364271	-0.38835	-0.410607	-0.430157	-0.44536	-0.454935	-0.458243	-0.453886	-0.441902	-0.422786	-0.396254	-0.362563	-0.321536	-0.272978	-0.217638	-0.156695	-0.0914082	-0.0232543
-0.124746	-0.0722625	-0.0288883	0.00955314	0.061829	0.140754	0.240802	0.341474	0.423208	0.48075	0.516661	0.532284	0.525522	0.496449	0.449892	0.392351	0.329848	0.265532	0.200501	0.13545	0.0729397	0.0226431	-0.0180779	-0.0514123	-0.0832035	-0.114106	-0.141425	-0.165513	-0.19078	-0.222093	-0.260548	-0.303166	-0.348247	-0.395234	-0.443216	-0.491499	-0.538535	-0.580977	-0.614982	-0.637403	-0.64755	-0.644513	-0.626556	-0.591898	-0.540144	-0.471765	-0.389343	-0.297373	-0.199873	-0.0955349
0.00722581	0.0253552	0.0438254	0.0786833	0.132616	0.194722	0.248525	0.285072	0.307906	0.320604	0.319555	0.299179	0.259079	0.206089	0.149958	0.0995464	0.0583734	0.0237504	-0.00796481	-0.037739	-0.0651812	-0.0920919	-0.123591	-0.162062	-0.204177	-0.244089	-0.277025	-0.302977	-0.325087	-0.344955	-0.362536	-0.378869	-0.396646	-0.417742	-0.442869	-0.469273	-0.49237	-0.506298	-0.507954	-0.49817	-0.479164	-0.45233	-0.414345	-0.365506	-0.309409	-0.249029	-0.184623	-0.1105	-0.0288495	0.0482786
-0.171355	-0.111059	-0.0510026	0.0148152	0.0917667	0.172033	0.240587	0.29014	0.327587	0.364463	0.401418	0.428631	0.438267	0.431039	0.407368	0.366376	0.310883	0.248967	0.189566	0.139711	0.104231	0.0835044	0.0666416	0.0464014	0.0238192	-0.000977843	-0.0294457	-0.0636745	-0.103099	-0.141438	-0.170934	-0.190254	-0.206149	-0.225172	-0.248698	-0.275935	-0.307232	-0.339259	-0.366458	-0.384917	-0.392905	-0.388012	-0.369799	-0.340099	-0.301133	-0.254152	-0.199566	-0.140432	-0.0767185	-0.00250635
0.0874583	0.155669	0.223127	0.299926	0.390528	0.485185	0.565816	0.62143	0.65414	0.669754	0.67037	0.655745	0.62722	0.58987	0.55058	0.512241	0.473334	0.430575	0.385652	0.343174	0.303905	0.265413	0.22587	0.190039	0.161814	0.136769	0.108499	0.0756705	0.0438279	0.0184899	-0.00249621	-0.0251094	-0.0511898	-0.0783333	-0.103745	-0.125707	-0.145595	-0.166456	-0.187933	-0.204654	-0.211657	-0.207625	-0.19271	-0.167119	-0.133009	-0.0950795	-0.0569874	-0.0171557	0.0279558	0.072077
0.0180667	0.0497569	0.0760061	0.114549	0.176313	0.254389	0.330034	0.387316	0.422573	0.439588	0.43934	0.41917	0.381246	0.336636	0.295402	0.262782	0.237414	0.211944	0.181648	0.139475	0.0956801	0.0511879	0.00868148	-0.0258027	-0.0470646	-0.058629	-0.0683717	-0.0847273	-0.110788	-0.143253	-0.177828	-0.213069	-0.247726	-0.2766	-0.295095	-0.304089	-0.307994	-0.312207	-0.322077	-0.337655	-0.354049	-0.366051	-0.368519	-0.357776	-0.332015	-0.291412	-0.239061	-0.180962	-0.122513	-0.0629306
0.0377	0.0808944	0.136606	0.213897	0.312305	0.422571	0.526439	0.602389	0.645495	0.662255	0.657123	0.623872	0.5544	0.455833	0.347063	0.253039	0.172672	0.108615	0.0475455	-0.0110662	-0.0627389	-0.108809	-0.146983	-0.178646	-0.209111	-0.235446	-0.252398	-0.258236	-0.254501	-0.245969	-0.237223	-0.230089	-0.225666	-0.224483	-0.228387	-0.237366	-0.245991	-0.249649	-0.249403	-0.245588	-0.24003	-0.234863	-0.229036	-0.220408	-0.205572	-0.180386	-0.142081	-0.0903596	-0.0303288	0.0338727
-0.0298182	0.0210073	0.0758384	0.148656	0.24795	0.370157	0.497972	0.598176	0.653152	0.671364	0.667494	0.646646	0.607713	0.547648	0.472862	0.407135	0.331311	0.255465	0.194843	0.132357	0.0731368	0.0243444	-0.0122626	-0.0379063	-0.0555565	-0.0703609	-0.0832792	-0.0942975	-0.105626	-0.119776	-0.138774	-0.162857	-0.190362	-0.216879	-0.240467	-0.261613	-0.28143	-0.300348	-0.316794	-0.330534	-0.340286	-0.345603	-0.346328	-0.339791	-0.32201	-0.288636	-0.240463	-0.181504	-0.117928	-0.0504518
-0.0082093	0.0260451	0.0653686	0.12245	0.203267	0.295901	0.378601	0.437529	0.470988	0.478412	0.4564	0.409671	0.352528	0.302404	0.267199	0.241922	0.216951	0.185212	0.144902	0.098872	0.0516288	0.00918288	-0.0260155	-0.0512511	-0.067981	-0.081222	-0.0967262	-0.118091	-0.145815	-0.179549	-0.217715	-0.25609	-0.288402	-0.311089	-0.326338	-0.341563	-0.362456	-0.388759	-0.416812	-0.442544	-0.461545	-0.469987	-0.464694	-0.445031	-0.41345	-0.373074	-0.32433	-0.267256	-0.202721	-0.132677
-0.0535	0.00791515	0.0793443	0.176032	0.303334	0.442273	0.562575	0.650753	0.715891	0.769269	0.810436	0.830711	0.827319	0.804733	0.767243	0.714301	0.644525	0.560441	0.466414	0.376558	0.299148	0.228937	0.168217	0.115537	0.0713619	0.0291141	-0.0146711	-0.0619052	-0.106908	-0.144368	-0.174644	-0.200878	-0.225659	-0.250943	-0.276773	-0.302905	-0.332217	-0.366117	-0.401935	-0.432899	-0.453091	-0.462522	-0.462696	-0.453077	-0.431335	-0.397395	-0.353459	-0.300714	-0.237133	-0.161626
-0.0829714	-0.052798	-0.023358	0.0196472	0.0919502	0.192681	0.30005	0.388263	0.445139	0.472681	0.477638	0.464344	0.435146	0.395372	0.352984	0.313896	0.279302	0.245434	0.209118	0.169993	0.127052	0.0793723	0.0300444	-0.0142214	-0.0476814	-0.071075	-0.0926556	-0.120406	-0.15535	-0.195715	-0.239408	-0.285162	-0.331059	-0.374352	-0.412434	-0.444734	-0.473461	-0.500794	-0.527046	-0.550643	-0.56909	-0.578857	-0.575151	-0.553173	-0.510403	-0.4481	-0.372048	-0.286651	-0.196287	-0.104842
-0.0064	0.0439416	0.0937165	0.162655	0.256888	0.367334	0.458093	0.514215	0.541157	0.549172	0.537423	0.498642	0.435352	0.357409	0.277379	0.200995	0.124084	0.0464606	-0.0252525	-0.0839526	-0.131135	-0.174322	-0.215931	-0.252231	-0.279265	-0.298888	-0.316837	-0.335325	-0.351293	-0.362185	-0.369709	-0.378142	-0.389175	-0.400511	-0.409929	-0.418449	-0.428723	-0.442617	-0.458991	-0.474298	-0.485898	-0.493322	-0.496156	-0.489755	-0.471202	-0.439392	-0.396361	-0.344227	-0.280504	-0.204373
0.000253012	0.0376597	0.0682323	0.108494	0.16931	0.240851	0.307694	0.361048	0.401687	0.432172	0.44749	0.439817	0.409237	0.368468	0.330507	0.299986	0.276681	0.256885	0.235836	0.211007	0.183305	0.153083	0.117631	0.0805457	0.048908	0.0278229	0.0152321	0.00406134	-0.0100932	-0.027028	-0.0447127	-0.0639645	-0.0888209	-0.11951	-0.150763	-0.177491	-0.19724	-0.209204	-0.215936	-0.21917	-0.218016	-0.209833	-0.192169	-0.16435	-0.126597	-0.0792048	-0.022946	0.0387447	0.100746	0.161274
0.0243784	0.101742	0.169229	0.241895	0.328938	0.413848	0.470215	0.49027	0.482829	0.454123	0.402882	0.33218	0.25239	0.17236	0.0941634	0.0175778	-0.0521628	-0.105404	-0.141034	-0.168786	-0.195396	-0.21722	-0.230258	-0.238823	-0.248136	-0.256323	-0.259677	-0.26121	-0.264961	-0.270483	-0.275609	-0.279364	-0.28274	-0.287941	-0.294648	-0.301386	-0.308842	-0.319043	-0.33075	-0.338684	-0.340533	-0.336842	-0.326548	-0.305635	-0.27405	-0.234242	-0.189444	-0.139017	-0.0786933	-0.0109671
-0.165175	-0.122878	-0.0748852	-0.0148918	0.0639501	0.147455	0.218494	0.267665	0.301613	0.323281	0.329528	0.319564	0.297525	0.267137	0.229104	0.182677	0.13094	0.0800625	0.0327648	-0.0109416	-0.0526816	-0.0950125	-0.134556	-0.16967	-0.203579	-0.238084	-0.271292	-0.300274	-0.323305	-0.3437	-0.362471	-0.380624	-0.398807	-0.41691	-0.434497	-0.450814	-0.465192	-0.476588	-0.48371	-0.486308	-0.482619	-0.470215	-0.447072	-0.413077	-0.368062	-0.311418	-0.242315	-0.165812	-0.0854651	-0.00132532
-0.0285823	0.0100345	0.0459081	0.0936966	0.158418	0.229047	0.289226	0.330627	0.352694	0.356411	0.341954	0.3078	0.258815	0.2064	0.15617	0.112246	0.0740449	0.0377488	0.00306674	-0.0284186	-0.05705	-0.0857054	-0.11553	-0.14288	-0.163633	-0.177691	-0.188471	-0.199407	-0.211382	-0.223147	-0.234394	-0.245939	-0.257879	-0.268852	-0.276524	-0.279381	-0.278182	-0.27525	-0.271547	-0.266469	-0.258816	-0.246948	-0.229858	-0.205354	-0.171944	-0.130847	-0.0853038	-0.0382039	0.00840391	0.0531355
-0.0503514	-0.00137183	0.0419866	0.0821073	0.133927	0.202703	0.271055	0.323324	0.358208	0.381396	0.394148	0.395024	0.38424	0.364696	0.340725	0.313304	0.280372	0.242458	0.203713	0.167477	0.132975	0.097846	0.0644114	0.03403	0.00823505	-0.0181777	-0.0483216	-0.0795307	-0.108373	-0.134441	-0.159885	-0.186923	-0.215837	-0.244243	-0.270602	-0.29652	-0.323953	-0.350471	-0.374832	-0.396142	-0.412837	-0.421526	-0.420133	-0.408769	-0.38758	-0.354939	-0.312315	-0.260449	-0.197387	-0.124986
0.0004	0.0679264	0.142319	0.225494	0.315084	0.398407	0.461146	0.49697	0.50984	0.507323	0.493395	0.46974	0.440373	0.406798	0.364683	0.311316	0.246795	0.18096	0.119517	0.0675419	0.026108	-0.00652294	-0.0335619	-0.0574656	-0.0792384	-0.100602	-0.125089	-0.155195	-0.188933	-0.221458	-0.248702	-0.271805	-0.293404	-0.315943	-0.342292	-0.374522	-0.411672	-0.449985	-0.48365	-0.509256	-0.525172	-0.530414	-0.524642	-0.50784	-0.480731	-0.44328	-0.395734	-0.338654	-0.269958	-0.188424
-0.0671724	-0.0066853	0.0675639	0.156572	0.261235	0.379668	0.502933	0.620424	0.721374	0.791677	0.827507	0.830128	0.806472	0.763978	0.713328	0.662355	0.613995	0.565439	0.515237	0.463662	0.410339	0.356368	0.305149	0.260089	0.222057	0.189725	0.159527	0.131321	0.10473	0.0771872	0.0493715	0.0206707	-0.00530286	-0.0272414	-0.0459794	-0.0633676	-0.08129	-0.0988433	-0.115388	-0.130315	-0.143026	-0.152513	-0.158249	-0.160701	-0.159435	-0.153092	-0.139889	-0.118313	-0.0887461	-0.0528546
-0.103617	-0.0580426	-0.00859381	0.046422	0.118268	0.212863	0.315021	0.40072	0.457629	0.487184	0.494634	0.485641	0.465505	0.439065	0.41112	0.384774	0.359285	0.330506	0.295641	0.257244	0.219578	0.184165	0.152132	0.125695	0.106048	0.089873	0.0706482	0.0451634	0.0155389	-0.0153164	-0.0461512	-0.0756499	-0.10274	-0.127043	-0.148614	-0.168884	-0.189887	-0.213096	-0.237185	-0.257861	-0.271189	-0.275441	-0.270112	-0.25544	-0.232832	-0.204062	-0.169842	-0.129665	-0.0843746	-0.0362637
-0.0725761	-0.0119802	0.0338338	0.0817016	0.157324	0.268275	0.394824	0.506143	0.584967	0.63473	0.665272	0.678486	0.670432	0.643188	0.606375	0.568423	0.531065	0.490582	0.442294	0.385162	0.324848	0.269502	0.222771	0.182454	0.147337	0.119987	0.10138	0.0867569	0.0683072	0.0428017	0.0151281	-0.0104306	-0.0341939	-0.0578225	-0.0817516	-0.105254	-0.126197	-0.14296	-0.157068	-0.172489	-0.190173	-0.206199	-0.214704	-0.211475	-0.195836	-0.167548	-0.127078	-0.0776064	-0.0220863	0.0405217
-0.119561	-0.0535986	0.00300627	0.0542893	0.121677	0.2136	0.315534	0.403834	0.470042	0.512602	0.533634	0.53249	0.510052	0.468218	0.411591	0.346355	0.278034	0.20911	0.140961	0.0797692	0.0272433	-0.0149582	-0.0525539	-0.0904122	-0.126316	-0.158136	-0.189023	-0.221583	-0.255187	-0.286997	-0.316907	-0.347399	-0.378644	-0.411136	-0.444228	-0.478343	-0.510774	-0.542553	-0.572628	-0.59815	-0.616407	-0.625775	-0.625459	-0.614004	-0.588488	-0.547832	-0.495265	-0.435263	-0.365951	-0.28089
-0.109697	-0.0914821	-0.0837383	-0.0657687	-0.0192921	0.0516318	0.125004	0.186125	0.232252	0.260318	0.267415	0.257757	0.241227	0.225956	0.214038	0.202735	0.18789	0.166583	0.137416	0.0992771	0.0547476	0.0122839	-0.0205585	-0.0445362	-0.0662536	-0.0934022	-0.126498	-0.161544	-0.198971	-0.238641	-0.276242	-0.308087	-0.333203	-0.35514	-0.380939	-0.414804	-0.454054	-0.493948	-0.529847	-0.555668	-0.56608	-0.559881	-0.542366	-0.519757	-0.49227	-0.456628	-0.410436	-0.352369	-0.282695	-0.202427
-0.119573	-0.067878	-0.033736	-0.0162769	0.0132595	0.0668642	0.127728	0.176081	0.209582	0.233169	0.251107	0.261443	0.259337	0.244628	0.222447	0.197548	0.169594	0.1363	0.0987203	0.0603423	0.0215714	-0.0180495	-0.0551681	-0.0858268	-0.109414	-0.130282	-0.152808	-0.177881	-0.202188	-0.225026	-0.245119	-0.261207	-0.273133	-0.281447	-0.287405	-0.292706	-0.298442	-0.303286	-0.305135	-0.302058	-0.292508	-0.275222	-0.250373	-0.217863	-0.178579	-0.134047	-0.0838683	-0.0306825	0.0222207	0.0771607
-0.0520922	-0.00391095	0.0567727	0.127326	0.211835	0.308205	0.405097	0.487259	0.544992	0.577048	0.589767	0.590376	0.582082	0.566384	0.545121	0.518437	0.483836	0.438968	0.385015	0.327043	0.271343	0.222103	0.181485	0.148788	0.119913	0.090863	0.059736	0.0259942	-0.00960456	-0.0447802	-0.0764206	-0.104124	-0.12873	-0.152508	-0.177602	-0.204712	-0.231819	-0.255067	-0.269269	-0.27209	-0.262497	-0.240809	-0.21069	-0.172897	-0.127562	-0.0752379	-0.0168918	0.046479	0.109791	0.171164
-0.03788	-8.44444e-05	0.0498412	0.136664	0.266107	0.405921	0.517825	0.588224	0.62182	0.62716	0.613256	0.594922	0.586143	0.586004	0.576442	0.537741	0.46767	0.382532	0.300622	0.235086	0.191118	0.164553	0.144047	0.116277	0.0735927	0.0198451	-0.0383558	-0.0920873	-0.132871	-0.157175	-0.169474	-0.183262	-0.212015	-0.256947	-0.309355	-0.357058	-0.392587	-0.414044	-0.42517	-0.432873	-0.441381	-0.448903	-0.450608	-0.440314	-0.412236	-0.363891	-0.295321	-0.213758	-0.131912	-0.0578618
-0.0733125	-0.0327424	0.0265423	0.128619	0.266104	0.409217	0.530752	0.622727	0.68554	0.713926	0.704474	0.665972	0.614968	0.564183	0.51722	0.471705	0.422545	0.367395	0.308932	0.246868	0.183615	0.126991	0.0819167	0.0463845	0.0137311	-0.0179217	-0.0462096	-0.0716023	-0.100121	-0.132745	-0.163591	-0.190223	-0.214681	-0.242063	-0.276727	-0.316948	-0.358875	-0.400798	-0.441592	-0.479386	-0.510991	-0.533829	-0.54753	-0.552458	-0.546299	-0.526818	-0.496831	-0.465483	-0.438517	-0.408605
-0.0575575	0.00890033	0.0587159	0.107678	0.192625	0.319838	0.446408	0.535506	0.583713	0.610499	0.620515	0.603957	0.554357	0.482264	0.40833	0.341077	0.275589	0.205819	0.134257	0.0681836	0.00887146	-0.0490606	-0.104937	-0.149425	-0.180106	-0.205046	-0.233865	-0.268134	-0.302038	-0.334643	-0.371122	-0.414675	-0.461809	-0.505094	-0.539955	-0.570213	-0.603914	-0.642484	-0.679393	-0.707411	-0.722045	-0.720246	-0.698873	-0.657391	-0.600307	-0.53038	-0.449119	-0.362605	-0.273046	-0.180045
-0.0525143	-0.00935296	0.0311289	0.0912857	0.184157	0.295264	0.396213	0.471894	0.527006	0.56823	0.592718	0.593408	0.575024	0.549091	0.523219	0.49659	0.464018	0.422471	0.374342	0.325986	0.27994	0.233326	0.186792	0.146871	0.116709	0.0911544	0.0632218	0.0301779	-0.00326739	-0.0320569	-0.0594723	-0.0893388	-0.117562	-0.139524	-0.155751	-0.170012	-0.186691	-0.207302	-0.226998	-0.239955	-0.243355	-0.235691	-0.216169	-0.18452	-0.14254	-0.0941519	-0.044039	0.00545281	0.0561394	0.109821
-0.112516	-0.0614151	-0.0371548	0.000745846	0.0848918	0.196536	0.290739	0.349529	0.38445	0.407378	0.419612	0.420229	0.410244	0.392934	0.372133	0.345582	0.308953	0.268689	0.233155	0.200857	0.163916	0.128949	0.104444	0.0849508	0.0625024	0.0323949	0.00276083	-0.021651	-0.0456302	-0.070999	-0.0975337	-0.124951	-0.150139	-0.17386	-0.20113	-0.231775	-0.262246	-0.290516	-0.314542	-0.330865	-0.335745	-0.330474	-0.319388	-0.300749	-0.269616	-0.226443	-0.177476	-0.12681	-0.0711017	-0.0092913
-0.153193	-0.154114	-0.150916	-0.119253	-0.0474621	0.0448017	0.126843	0.186647	0.2272	0.243854	0.238496	0.227786	0.228598	0.244509	0.263133	0.267656	0.249689	0.213194	0.165053	0.11886	0.0881907	0.0747125	0.0666402	0.0506308	0.0218616	-0.0141218	-0.0559592	-0.0980609	-0.131391	-0.151728	-0.16401	-0.179656	-0.20739	-0.245419	-0.287448	-0.326394	-0.355321	-0.371509	-0.37781	-0.384801	-0.398167	-0.415557	-0.431603	-0.439374	-0.431977	-0.405385	-0.359719	-0.303363	-0.24483	-0.186362
[truncated: 11 more columns]
