# Supplementary material for: Comparison of sagittal plane gait characteristics between the overground and treadmill approach for gait analysis in typically developing children
Source: PeerJ. 2022 Jul 22;10:e13752. doi: 10.7717/peerj.13752 (PMC9310770; doi:10.7717/peerj.13752)
Supplement: Supplemental Information 9 — Each colum represents a percentage of the gait cycle (0–100%). Every raw represents data of one child.Sheet 1 data of the overground approachSheet 2 data of the treadmill approach [file peerj-10-13752-s009.xlsx]

## Sheet: 1
26.9139	26.9263	26.9333	26.9102	26.8307	26.668	26.3982	26.0032	25.4459	24.6739	23.9016	23.031	22.0853	21.0885	20.0623	19.0245	17.9877	16.96	15.9459	14.9472	13.9644	13.0235	12.0949	11.1528	10.2156	9.27912	8.33932	7.39233	6.38475	5.38778	4.39487	3.38609	2.36147	1.32205	0.269683	-0.792292	-1.86008	-2.92796	-3.98935	-5.03612	-6.20187	-7.19555	-8.15029	-9.05995	-9.9194	-10.7232	-11.4653	-12.1377	-12.7299	-13.2284
36.686	37.1258	37.5485	37.9134	38.1675	38.2726	38.2121	37.9855	37.605	37.0869	36.4413	35.682	34.8095	33.8209	32.7146	31.4766	30.1287	28.6901	27.1632	25.6034	24.0317	22.4724	20.9427	19.4558	18.0278	16.6092	15.253	13.9402	12.6777	11.3975	10.1601	8.93184	7.70306	6.4716	5.24395	3.924	2.61103	1.27834	-0.0552791	-1.4845	-2.84357	-4.29567	-5.66881	-7.00249	-8.2798	-9.48463	-10.6012	-11.6139	-12.5071	-13.2655
27.8423	27.3003	26.7632	26.2243	25.6739	25.1037	24.5121	23.8919	23.2501	22.5838	21.8925	21.1729	20.4114	19.5981	18.7221	17.7702	16.7472	15.6662	14.5436	13.3993	12.254	11.1233	10.014	8.93185	7.87887	6.84781	5.8339	4.83412	3.84383	2.85312	1.85605	0.847188	-0.178547	-1.22504	-2.29129	-3.37465	-4.47229	-5.57807	-6.68453	-7.77941	-8.85236	-9.89304	-10.8855	-11.8203	-12.698	-13.4983	-14.1959	-14.7752	-15.2572	-15.6331
25.2573	25.1773	25.0152	24.7936	24.5429	24.2886	24.0443	23.8069	23.5575	23.2675	22.9067	22.4496	21.8813	21.1972	20.4022	19.5063	18.5193	17.4498	16.3035	15.0853	13.8026	12.4673	11.0958	9.71028	8.33398	6.9892	5.69474	4.46354	3.30194	2.21029	1.18358	0.212355	-0.715624	-1.61344	-2.49204	-3.36085	-4.22517	-5.08781	-5.9463	-6.79538	-7.628	-8.43365	-9.2021	-9.92045	-10.577	-11.158	-11.65	-12.0395	-12.3131	-12.4594
40.3144	40.18	39.9895	39.7173	39.3413	38.8387	38.1974	37.4424	36.5913	35.6585	34.6561	33.5945	32.4823	31.3187	30.0982	28.8142	27.4639	26.0546	24.591	23.0866	21.5552	20.0154	18.4773	16.9579	15.4695	14.0225	12.6267	11.2891	10.0103	8.78922	7.62951	6.52464	5.47018	4.45946	3.48606	2.54861	1.63437	0.735229	-0.151838	-1.0285	-1.96651	-2.88096	-3.72848	-4.55676	-5.36283	-6.14502	-6.89829	-7.60748	-8.26118	-8.83902
43.8811	43.7416	43.8714	43.8976	43.9953	44.0655	44.1274	44.1201	43.8883	43.3582	42.6988	41.8818	40.9216	39.8481	38.6532	37.3902	36.0765	34.7503	33.3851	31.9679	30.5398	29.1523	27.7368	26.3092	24.9387	23.6065	22.331	21.1681	19.9847	18.8694	17.7726	16.8166	15.8528	14.9522	14.1137	13.3014	12.4943	11.6751	10.8256	9.93167	8.98226	8.01376	6.95642	5.79652	4.68277	3.51733	2.35025	1.22544	0.166806	-0.861023
27.6708	27.6534	27.6605	27.6576	27.6197	27.526	27.3544	27.123	26.755	26.2473	25.6233	24.8659	23.9724	22.9529	21.8172	20.5822	19.2711	17.9076	16.4904	15.0503	13.6042	12.166	10.7468	9.34882	7.97376	6.65023	5.36311	4.11145	2.89544	1.71462	0.566631	-0.550627	-1.64005	-2.70151	-3.73779	-4.7515	-5.74614	-6.72199	-7.68035	-8.62315	-9.55157	-10.4657	-11.3622	-12.2362	-13.085	-13.8924	-14.6369	-15.3051	-15.8764	-16.3127
29.986	29.859	29.7255	29.576	29.3993	29.1835	28.9156	28.5807	28.1631	27.6528	27.0422	26.3284	25.5155	24.5303	23.5479	22.516	21.4354	20.322	19.1891	18.0477	16.9067	15.7726	14.6474	13.5298	12.4167	11.3038	10.1871	9.06373	7.93228	6.79285	5.64074	4.48261	3.35417	2.18832	1.04798	-0.0860668	-1.21727	-2.30148	-3.37445	-4.45541	-5.40617	-6.36083	-7.29283	-8.18736	-9.0392	-9.79798	-10.5255	-11.1333	-11.6336	-12.0197
29.6724	29.8072	29.8838	29.96	29.9505	29.8331	29.6661	29.1894	28.5279	27.6862	26.7327	25.7903	24.6986	23.5165	22.2813	21.0155	19.7747	18.5265	17.2705	15.9905	14.7142	13.422	12.1261	10.9075	9.54689	8.19619	6.89363	5.59929	4.31836	3.03817	1.78125	0.534812	-0.699079	-1.86088	-2.89072	-4.11441	-5.29176	-6.38057	-7.40359	-8.51374	-9.41932	-10.1092	-10.9922	-11.6803	-12.2983	-12.8681	-13.3597	-13.7047	-14.257	-14.6051
37.4239	37.4315	37.6866	38.2622	38.6301	38.5995	37.9111	36.7738	35.9572	35.0879	34.5244	33.9162	33.1128	32.3739	31.5585	30.5218	29.4243	28.1771	26.952	25.8237	24.6707	23.539	22.358	21.1455	19.8819	18.5196	17.2081	15.7919	14.4874	13.2499	11.9916	10.7188	9.33202	8.04283	6.76856	5.46445	4.13912	2.79509	1.34982	-0.20836	-1.74784	-3.06679	-4.42444	-5.65212	-6.67898	-7.50788	-8.2449	-8.96332	-9.58964	-10.0809
26.9057	26.603	26.286	26.0322	25.8325	25.6299	25.4441	25.2789	25.1323	24.8372	24.4116	23.8557	23.1641	22.4095	21.6054	20.7157	19.823	19.2041	18.4864	17.7268	16.9942	16.2225	15.4351	14.6093	13.7984	13.0589	12.2981	11.5708	10.8323	10.1006	9.44972	8.78406	8.00602	7.13926	6.34628	5.53329	4.60645	3.75886	2.90514	2.102	1.29078	0.41401	-0.489745	-1.34009	-2.12489	-2.81061	-3.45206	-4.08634	-4.6418	-5.08586
39.2668	38.8749	38.4654	38.0293	37.5391	36.9516	36.2953	35.587	34.8211	33.9501	32.9871	31.9259	30.7644	29.52	28.1934	26.7985	25.3471	23.8526	22.3273	20.7835	19.2303	17.6636	16.1149	14.5936	13.1232	11.6846	10.2604	8.87369	7.5246	6.21611	4.94509	3.71389	2.51861	1.35704	0.23053	-0.865112	-1.92836	-2.95905	-3.95796	-4.91809	-5.8366	-6.70267	-7.50981	-8.25518	-8.92909	-9.51532	-9.99561	-10.3681	-10.6117	-10.7224
34.2482	33.8669	33.5236	33.1836	32.7985	32.367	31.8562	31.2455	30.5138	29.6551	28.6793	27.5767	26.3921	25.167	23.91	22.6185	21.3435	20.089	18.853	17.6323	16.4256	15.212	14.0494	12.9242	11.8254	10.7502	9.69479	8.65787	7.64546	6.64129	5.64533	4.65508	3.65649	2.64536	1.61846	0.597309	-0.463764	-1.58866	-2.71991	-3.87591	-5.04877	-6.2298	-7.41153	-8.58099	-9.72708	-10.8281	-11.8767	-12.8611	-13.7317	-14.4638
27.8484	27.5005	27.173	26.8629	26.5526	26.2124	25.8216	25.3539	24.7925	24.1324	23.3447	22.4124	21.3408	20.1487	18.8639	17.5162	16.1348	14.7344	13.3406	11.9656	10.6369	9.36295	8.17164	7.05899	6.01503	5.02477	4.07262	3.15372	2.25233	1.3539	0.426306	-0.519479	-1.4813	-2.46267	-3.4692	-4.50211	-5.5569	-6.62909	-7.70933	-8.80341	-9.87005	-10.9105	-11.9256	-12.9053	-13.8321	-14.6991	-15.5041	-16.2347	-16.8313	-17.3357
36.1956	36.2083	36.2392	36.2669	36.2576	36.1936	36.0589	35.8357	35.4983	35.0326	34.4353	33.6995	32.8347	31.8499	30.7378	29.5129	28.1889	26.7837	25.3113	23.795	22.2521	20.6985	19.1656	17.6576	16.1856	14.7698	13.4105	12.0926	10.8126	9.58815	8.37928	7.17967	5.99631	4.81103	3.61867	2.41948	1.20671	-0.0217988	-1.25411	-2.48312	-3.70178	-4.89773	-6.05634	-7.16669	-8.21258	-9.16677	-10.0281	-10.7952	-11.4276	-11.9135
28.3671	28.3665	28.3394	28.2767	28.168	28.0037	27.7747	27.4729	27.0915	26.6254	26.0713	25.4275	24.6944	23.8739	22.9697	21.9884	20.9364	19.8228	18.6568	17.4475	16.2052	14.9393	13.6582	12.3701	11.0819	9.79916	8.52618	7.26628	6.02144	4.79277	3.58047	2.38398	1.20292	0.0360513	-1.11739	-2.25796	-3.3854	-4.49869	-5.59651	-6.67575	-7.73262	-8.76122	-9.75549	-10.7081	-11.6099	-12.451	-13.2209	-13.9079	-14.5005	-14.9875
29.586	29.5695	29.3542	29.19	29.0019	28.7514	28.3406	27.95	27.4689	26.8628	26.1779	25.4727	24.5665	23.659	22.6963	21.7302	20.6169	19.5334	18.4679	17.3094	16.2242	15.0741	13.9724	12.8971	11.8004	10.7366	9.66629	8.60672	7.55393	6.48963	5.43767	4.42535	3.40641	2.39178	1.34536	0.348977	-0.619549	-1.56388	-2.481	-3.2904	-4.13999	-4.9584	-5.74357	-6.5032	-7.30183	-7.89505	-8.54078	-9.12471	-9.676	-10.2082
25.054	24.8464	24.7598	24.5395	24.177	23.6714	23.027	22.2513	21.3539	20.3466	19.2424	18.0543	16.7984	15.4968	14.1757	12.8639	11.5916	10.3851	9.25104	8.18529	7.23918	6.37746	5.57971	4.82076	4.07439	3.31812	2.53747	1.73076	0.902447	0.0535938	-0.822243	-1.73298	-2.68007	-3.65472	-4.63752	-5.60117	-6.51614	-7.36818	-8.16075	-8.90659	-9.61906	-10.2886	-10.754	-11.5384	-12.2609	-12.9353	-13.6088	-14.2731	-14.9165	-15.5231
40.6304	40.5515	40.4063	40.3287	40.1657	39.9425	39.6493	39.2621	38.7616	38.1381	37.393	36.5362	35.5819	34.5448	33.4377	32.2715	31.0569	29.8079	28.5405	27.2726	26.0191	24.7909	23.5927	22.4238	21.2753	20.135	18.9907	17.833	16.6574	15.4652	14.2619	13.0567	11.8605	10.6831	9.53358	8.41915	7.34539	6.31664	5.33572	4.40421	3.52339	2.69384	1.91456	1.18354	0.499434	-0.137682	-0.727	-1.26403	-1.74062	-2.14487
25.2184	25.1777	25.1334	25.1612	25.1081	25.0385	24.8933	24.6547	24.3519	23.9779	23.5037	22.9317	22.2553	21.4609	20.5527	19.5482	18.4696	17.3399	16.1765	14.9896	13.7888	12.5796	11.3731	10.1849	8.97616	7.77784	6.59238	5.47958	4.31352	3.19397	2.03888	0.878265	-0.290836	-1.46995	-2.64996	-3.82284	-4.99204	-6.15547	-7.3012	-8.42149	-9.51242	-10.5686	-11.5823	-12.5468	-13.4517	-14.2921	-15.1063	-15.7962	-16.4042	-16.9086
37.669	37.7194	37.7964	37.8719	37.9072	37.8572	37.6755	37.3158	36.7409	35.942	34.9341	33.7477	32.4249	31.0116	29.5492	28.0644	26.5693	25.0691	23.5677	22.0722	20.5965	19.1592	17.7736	16.4356	15.1407	13.8846	12.6607	11.4614	10.2706	9.07829	7.89144	6.7175	5.56281	4.43059	3.31838	2.22194	1.13342	0.045285	-1.04902	-2.15347	-3.26832	-4.38972	-5.51073	-6.62088	-7.70821	-8.75894	-9.75482	-10.6809	-11.5203	-12.2505
31.9076	31.9523	31.9323	31.9872	31.983	31.8745	31.7429	31.488	31.1135	30.6179	30.0055	29.2873	28.4776	27.5188	26.4734	25.4773	24.4475	23.3982	22.343	21.2959	20.2692	19.273	18.3142	17.3957	16.5166	15.6723	14.8565	14.0626	13.2826	12.5101	11.7394	11.0795	10.3338	9.52646	8.70285	7.85919	6.99116	6.09494	5.16783	4.20813	3.21625	2.19519	1.15198	0.0964456	-0.957785	-1.99449	-2.99599	-3.94291	-4.81468	-5.59127
7.72283	7.7925	8.1708	8.55661	8.99916	9.29364	9.25558	8.79928	7.97274	6.86968	5.63612	4.3882	3.15245	1.93986	0.727098	-0.495222	-1.71649	-2.96695	-4.18775	-5.39868	-6.60319	-7.74403	-8.91122	-10.0739	-11.2258	-12.3644	-13.4852	-14.5866	-15.6579	-16.6821	-17.6572	-18.6222	-19.527	-20.4569	-21.384	-22.2996	-23.221	-24.153	-25.073	-25.9965	-26.897	-27.7957	-28.6069	-29.3825	-30.0769	-30.7131	-31.2666	-31.7375	-32.139	-32.4782
25.6612	25.6134	25.5476	25.4591	25.3416	25.1847	24.9786	24.717	24.3907	23.9935	23.5211	22.9734	22.3829	22.1632	21.5144	20.671	19.7713	18.8177	17.8137	16.764	15.6766	14.5595	13.4208	12.2697	11.1139	9.96132	8.81728	7.68698	6.57448	5.48231	4.41208	3.38014	2.40026	1.44825	0.488833	-0.442324	-1.34422	-2.21387	-3.0696	-3.92914	-4.70643	-5.38035	-6.00344	-6.63008	-7.20313	-7.7169	-8.16621	-8.6631	-8.95939	-9.0721
43.8963	44.0991	44.3181	44.5357	44.7322	44.8864	44.9668	44.946	44.805	44.5288	44.1037	43.5178	42.7687	41.8603	40.803	39.615	38.3145	36.9238	35.4645	33.9608	32.4357	30.9111	29.4026	27.9228	26.4807	25.0825	23.7282	22.4165	21.1423	19.8998	18.682	17.4811	16.289	15.0999	13.9083	12.7098	11.5038	10.2911	9.07577	7.86351	6.66281	5.48561	4.34466	3.2523	2.22434	1.27605	0.425663	-0.310639	-0.925489	-1.39741
36.1371	36.0465	35.953	35.8446	35.7084	35.5305	35.2972	34.996	34.6169	34.1519	33.5967	32.9507	32.2166	31.4008	30.5119	29.5605	28.5584	27.517	26.4475	25.3594	24.2609	23.1588	22.0581	20.9625	19.8743	18.7952	17.7258	16.6666	15.6175	14.5784	13.5488	12.5285	11.5172	10.5142	9.51926	8.5322	7.55304	6.58196	5.62001	4.6689	3.73131	2.8111	1.91344	1.04489	0.213677	-0.569993	-1.29476	-1.94769	-2.51506	-2.9825
32.3013	32.4538	32.6041	32.7298	32.7963	32.7671	32.6108	32.2887	31.8411	31.279	30.606	29.8308	28.9576	27.9915	26.9427	25.8189	24.6308	23.3912	22.1137	20.8112	19.4927	18.1629	16.8264	15.4885	14.1567	12.8394	11.5419	10.2667	9.01335	7.77954	6.55069	5.3404	4.14688	2.96152	1.78178	0.607183	-0.564067	-1.73332	-2.89762	-4.05243	-5.19084	-6.30382	-7.38185	-8.41492	-9.39317	-10.3079	-11.1494	-11.9083	-12.5774	-13.1386
26.2939	26.3814	26.7154	27.265	27.6965	27.8794	27.8927	27.6261	27.0526	26.2197	25.3176	24.4327	23.548	22.7034	21.8548	20.9071	19.8186	18.5937	17.2744	15.9019	14.5262	13.1792	11.9315	10.7194	9.52405	8.32266	7.0791	5.80786	4.54229	3.28078	2.04595	0.875562	-0.268563	-1.34938	-2.36482	-3.33917	-4.27946	-5.22845	-6.18029	-7.18182	-8.25932	-9.40659	-10.6423	-11.9349	-13.2221	-14.445	-15.6055	-16.7119	-17.6864	-18.5396
30.8734	30.8467	30.7948	30.7037	30.5592	30.3483	30.0599	29.6859	29.2216	28.6205	27.9507	27.2315	26.4325	25.5605	24.6236	23.6315	22.5941	21.5221	20.4252	19.3121	18.1899	17.0633	15.9347	14.8046	13.6718	12.534	11.3883	10.1724	8.98354	7.79714	6.59803	5.38889	4.17427	2.96067	1.75585	0.568035	-0.593898	-1.72165	-2.808	-3.84739	-4.83507	-5.76749	-6.64288	-7.45941	-8.21455	-8.9042	-9.52293	-10.0624	-10.5121	-10.8607
24.7914	24.6665	24.6026	24.5994	24.5966	24.5313	24.3644	24.0359	23.5503	22.9585	22.2676	21.4867	20.6235	19.6636	18.6413	17.51	16.3029	15.0399	13.7013	12.3115	10.8982	9.48644	8.10352	6.74217	5.41303	4.11267	2.86706	1.65621	0.480564	-0.677895	-1.82495	-2.93912	-4.03406	-5.09744	-6.13955	-7.14298	-8.12656	-9.09321	-10.053	-11.0157	-11.9682	-12.8909	-13.7813	-14.6013	-15.3531	-16.0441	-16.6681	-17.2144	-17.6865	-18.0791
30.421	30.1658	29.9177	29.6837	29.4322	29.0976	28.626	28.0186	27.3215	26.5924	25.8608	25.1195	24.332	23.4676	22.5255	21.5263	20.4907	19.4283	18.3384	17.21	16.0373	14.8183	13.568	12.3125	11.0677	9.83738	8.62202	7.42891	6.25592	5.09996	3.96245	2.84844	1.76144	0.702832	-0.342814	-1.38671	-2.43156	-3.48042	-4.52847	-5.56231	-6.57065	-7.54747	-8.49056	-9.39755	-10.2659	-11.0908	-11.8679	-12.5921	-13.2511	-13.8347
31.4077	31.3473	31.2764	31.1797	31.0411	30.8442	30.5739	30.2168	29.7621	29.2026	28.5343	27.7574	26.876	25.8975	24.8328	23.6947	22.4972	21.2554	19.9839	18.6958	17.4032	16.1159	14.8413	13.5851	12.3501	11.1377	9.94736	8.77777	7.62658	6.49105	5.36817	4.25504	3.14907	2.04807	0.950556	-0.144165	-1.23592	-2.3235	-3.40464	-4.47583	-5.53236	-6.56804	-7.57541	-8.54557	-9.46824	-10.3312	-11.1217	-11.8255	-12.4278	-12.9142
35.8526	35.8375	35.8336	35.8217	35.7795	35.6834	35.5103	35.2394	34.8538	34.3417	33.6972	32.9206	32.0178	30.9993	29.8787	28.6727	27.3975	26.07	24.7052	23.3155	21.9114	20.5011	19.0909	17.686	16.2906	14.9086	13.5435	12.1989	10.8787	9.58619	8.32453	7.09631	5.90347	4.74665	3.62565	2.5392	1.48506	0.460478	-0.538445	-1.51558	-2.47443	-3.41771	-4.34687	-5.26137	-6.15819	-7.03108	-7.87069	-8.66349	-9.39383	-10.0428
33.958	33.9462	33.9262	33.8828	33.7951	33.6387	33.3897	33.029	32.545	31.9347	31.2027	30.3598	29.4199	28.3976	27.3069	26.16	24.9672	23.7377	22.48	21.2029	19.9151	18.6247	17.3383	16.0596	14.7894	13.5255	12.2631	10.9956	9.71516	8.4123	7.07664	5.70021	4.28018	2.82184	1.33918	-0.147102	-1.61467	-3.04559	-4.4307	-5.77005	-7.06777	-8.32098	-9.5154	-10.6406	-11.6975	-12.6886	-13.6097	-14.4482	-15.1866	-15.8057
36.8959	37.2602	37.7007	38.1778	38.6431	39.0438	39.3296	39.4611	39.4139	39.1789	38.759	38.1652	37.4115	36.5138	35.4901	34.3602	33.144	31.8626	30.5356	29.1801	27.81	26.4353	25.062	23.6925	22.3265	20.9614	19.5932	18.2179	16.8317	15.4324	14.0193	12.5929	11.1549	9.70815	8.2563	6.80451	5.36002	3.93172	2.52965	1.16396	-0.156088	-1.42276	-2.63098	-3.77712	-4.8586	-5.87297	-6.81751	-7.68704	-8.47476	-9.17108
33.5417	33.424	33.2543	33.0248	32.7287	32.361	31.9188	31.4009	30.8072	30.1392	29.4006	28.5929	27.7161	26.7687	25.7493	24.6589	23.5	22.2766	20.9957	19.6644	18.2895	16.8814	15.4492	14.0025	12.5503	11.101	9.66164	8.23829	6.83423	5.45163	4.09112	2.75192	1.43236	0.131575	-1.15305	-2.42292	-3.67911	-4.92231	-6.15177	-7.36488	-8.55844	-9.72752	-10.8654	-11.9643	-13.0143	-14.0038	-14.9199	-15.7517	-16.4842	-17.1008
43.6772	43.6556	43.6087	43.5429	43.4602	43.357	43.224	43.0476	42.812	42.5019	42.1045	41.6102	41.0149	40.3186	39.5252	38.6405	37.6708	36.6231	35.5046	34.3231	33.0878	31.8086	30.497	29.1639	27.8202	26.475	25.1348	23.8037	22.4829	21.1716	19.8674	18.5668	17.2665	15.9635	14.6557	13.3422	12.0237	10.702	9.38029	8.06328	6.75655	5.46674	4.20132	2.96945	1.78004	0.643898	-0.428144	-1.42439	-2.33251	-3.14133
33.9472	33.8823	33.8157	33.7366	33.6327	33.4883	33.2872	33.0165	32.6665	32.2276	31.694	31.0603	30.3264	29.4895	28.5556	27.5298	26.4189	25.2333	23.9846	22.6823	21.3387	19.9666	18.577	17.1795	15.7841	14.4003	13.0337	11.6882	10.3673	9.073	7.80534	6.56423	5.34781	4.15297	2.97664	1.81605	0.668929	-0.467238	-1.59361	-2.71075	-3.81715	-4.90875	-5.97883	-7.01843	-8.01511	-8.95457	-9.82024	-10.5942	-11.2593	-11.7908
47.1531	47.1737	47.1763	47.1473	47.072	46.9247	46.6773	46.3221	45.8493	45.2478	44.5094	43.6399	42.6566	41.5697	40.3844	39.1114	37.7622	36.3445	34.8684	33.3445	31.7845	30.2	28.6021	27.0028	25.4132	23.8424	22.2975	20.7836	19.3037	17.8596	16.4549	15.0896	13.7677	12.4891	11.2532	10.0608	8.91136	7.80419	6.73784	5.71153	4.7273	3.78641	2.89021	2.04255	1.25248	0.53201	-0.110562	-0.659941	-1.10604	-1.43047
17.2555	17.3023	17.3261	17.3137	17.2443	17.0961	16.8497	16.4871	16.0015	15.4076	14.7259	13.9635	13.118	12.1902	11.1881	10.121	8.99867	7.83267	6.63573	5.41879	4.19097	2.96096	1.73739	0.529062	-0.650739	-1.81546	-2.95799	-4.08027	-5.18568	-6.27896	-7.36494	-8.44732	-9.52802	-10.6085	-11.6906	-12.7416	-13.8132	-14.9207	-16.0182	-17.0617	-18.1231	-19.1694	-20.192	-21.1805	-22.1233	-23.0097	-23.8303	-24.5747	-25.2322	-25.7912
45.0957	45.3779	45.629	45.8214	45.9292	45.9301	45.8071	45.549	45.1495	44.607	43.9233	43.1032	42.1535	41.0834	39.9041	38.6283	37.2693	35.8416	34.3592	32.8346	31.2799	29.7047	28.1167	26.5219	24.9247	23.3279	21.7334	20.1425	18.5555	16.9725	15.3935	13.8184	12.248	10.683	9.12497	7.57584	6.03815	4.515	3.01001	1.52761	0.0733845	-1.34537	-2.71995	-4.03927	-5.28985	-6.45503	-7.51657	-8.45274	-9.24214	-9.86334
34.1201	34.314	34.5059	34.6754	34.8011	34.862	34.8388	34.7152	34.4784	34.12	33.636	33.0279	32.3013	31.4648	30.5305	29.512	28.424	27.2815	26.0995	24.8923	23.6735	22.4553	21.248	20.0604	18.8987	17.767	16.6674	15.6004	14.5646	13.5576	12.5761	11.6158	10.6723	9.7412	8.81818	7.89954	6.98234	6.06478	5.14664	4.22951	3.31685	2.41462	1.5309	0.676448	-0.135365	-0.888708	-1.56685	-2.15127	-2.62259	-2.96358
21.0333	21.1251	21.2218	21.298	21.3288	21.2904	21.1624	20.9281	20.5756	20.098	19.4935	18.7657	17.9228	16.9766	15.9411	14.8326	13.6674	12.4615	11.2291	9.98228	8.73057	7.48065	6.23649	4.99968	3.76989	2.54531	1.32331	0.100962	-1.12445	-2.35502	-3.59186	-4.83488	-6.08277	-7.33301	-8.58199	-9.82513	-11.0571	-12.2717	-13.4625	-14.6222	-15.7431	-16.8168	-17.8343	-18.7856	-19.6597	-20.4441	-21.1262	-21.6919	-22.1275	-22.419
32.0292	32.0241	32.0491	32.0771	32.0777	32.02	31.8737	31.6103	31.2048	30.6421	29.9152	29.0244	27.9774	26.7896	25.4818	24.0806	22.6145	21.11	19.5923	18.0833	16.6012	15.16	13.7697	12.4365	11.1614	9.94363	8.77977	7.66576	6.59558	5.56249	4.55994	3.58141	2.6212	1.67457	0.736815	-0.194783	-1.12118	-2.04197	-2.95485	-3.85552	-4.73828	-5.59638	-6.42083	-7.20135	-7.92644	-8.58169	-9.15308	-9.62677	-9.98682	-10.2193
29.8829	29.833	29.7793	29.7061	29.5971	29.4368	29.2116	28.9109	28.5269	28.0545	27.4908	26.8359	26.092	25.2645	24.361	23.3921	22.37	21.3086	20.222	19.1237	18.0266	16.9418	15.8788	14.8452	13.8464	12.8859	11.9654	11.0847	10.2422	9.4351	8.65903	7.90905	7.17972	6.46529	5.76023	5.05945	4.35865	3.65457	2.94551	2.23148	1.51452	0.79881	0.0907349	-0.601365	-1.26732	-1.89503	-2.47176	-2.98357	-3.417	-3.75835
39.2141	39.4789	39.7684	40.0533	40.3002	40.4686	40.5097	40.3993	40.1312	39.7028	39.1207	38.3961	37.5489	36.5996	35.565	34.4593	33.2944	32.0797	30.8271	29.5471	28.2492	26.9432	25.6384	24.3434	23.065	21.8105	20.5851	19.395	18.2479	17.1512	16.1119	15.1351	14.2256	13.3876	12.6162	11.9087	11.2536	10.6405	10.0552	9.48191	8.90804	8.32199	7.71632	7.08835	6.44081	5.78314	5.12828	4.49626	3.90619	3.38676
37.2231	37.0697	36.8786	36.6422	36.3532	36.0055	35.5945	35.1174	34.573	33.9605	33.2791	32.5276	31.7046	30.8088	29.8399	28.7992	27.6899	26.5174	25.289	24.0134	22.7	21.3586	19.9979	18.6258	17.2487	15.8712	14.4969	13.1278	11.7655	10.4112	9.06617	7.73208	6.4112	5.10652	3.82174	2.56119	1.32975	0.132735	-1.02427	-2.1355	-3.19506	-4.19684	-5.13515	-6.00396	-6.79706	-7.5076	-8.12863	-8.65245	-9.07063	-9.37411
33.6167	33.5352	33.4332	33.2982	33.1193	32.8886	32.601	32.2541	31.8462	31.3772	30.8463	30.251	29.5881	28.8545	28.049	27.1712	26.2241	25.2127	24.146	23.0333	21.8841	20.7095	19.519	18.3223	17.1277	15.9427	14.7725	13.6215	12.4926	11.3877	10.307	9.24981	8.21485	7.20013	6.20339	5.2231	4.25816	3.30772	2.37222	1.45315	0.55247	-0.326609	-1.18021	-2.00311	-2.78897	-3.52934	-4.21452	-4.83281	-5.36969	-5.81186
39.0185	38.8353	38.6539	38.4678	38.2693	38.0505	37.8028	37.5176	37.1887	36.8118	36.384	35.9042	35.3726	34.7904	34.16	33.4849	32.768	32.0109	31.2154	30.3833	29.5157	28.6133	27.6757	26.7032	25.6962	24.6555	23.5828	22.4795	21.3489	20.1946	19.0213	17.8341	16.639	15.4424	14.2508	13.0711	11.9101	10.7737	9.66747	8.59686	7.56581	6.57804	5.63571	4.74083	3.89545	3.10092	2.36067	1.6777	1.05725	0.509198
32.4445	32.3687	32.2809	32.1652	32.0039	31.777	31.4638	31.0532	30.5445	29.9394	29.2418	28.4577	27.5904	26.6458	25.6304	24.5511	23.4153	22.2295	21.0034	19.7469	18.47	17.1838	15.8989	14.6257	13.3708	12.1401	10.9361	9.76031	8.61263	7.49062	6.39166	5.31295	4.25054	3.20253	2.16572	1.13859	0.119477	-0.891749	-1.89254	-2.8798	-3.84931	-4.79424	-5.70582	-6.57306	-7.38291	-8.12433	-8.78299	-9.34414	-9.79715	-10.1237
30.0132	29.9233	29.8549	29.7839	29.6882	29.5403	29.3105	28.9855	28.5536	28.008	27.3615	26.5986	25.7335	24.785	23.7586	22.6655	21.5077	20.3099	19.0805	17.8204	16.5377	15.2381	13.9278	12.6062	11.2785	9.94527	8.605	7.25869	5.90217	4.53516	3.1718	1.81971	0.495523	-0.798298	-2.05996	-3.28534	-4.46096	-5.59507	-6.68269	-7.71549	-8.69534	-9.61121	-10.4654	-11.2566	-11.9845	-12.6389	-13.2265	-13.7315	-14.1473	-14.4611
25.358	24.7874	24.181	23.5658	22.959	22.3526	21.7227	21.0498	20.3272	19.5564	18.7437	17.8947	17.0091	16.0871	15.1341	14.1581	13.1658	12.1612	11.1466	10.1187	9.07309	8.00849	6.9268	5.83216	4.72858	3.6214	2.51635	1.41885	0.333014	-0.740169	-1.80168	-2.8537	-3.89913	-4.94003	-5.97755	-7.01264	-8.04432	-9.06941	-10.0832	-11.0804	-12.0571	-13.0108	-13.9367	-14.827	-15.673	-16.4635	-17.1844	-17.821	-18.3564	-18.7752
17.8642	17.9953	18.1235	18.2268	18.2756	18.2375	18.0828	17.7865	17.3301	16.7029	15.9039	14.9532	13.8884	12.7465	11.5553	10.3303	9.07576	7.78885	6.46342	5.09227	3.66844	2.19084	0.66051	-0.915786	-2.52916	-4.16836	-5.82179	-7.47846	-9.12923	-10.7673	-12.3879	-13.9879	-15.5644	-17.1149	-18.6373	-20.129	-21.587	-23.0077	-24.3868	-25.7175	-26.9943	-28.2081	-29.3512	-30.4111	-31.379	-32.2438	-32.9942	-33.6173	-34.1002	-34.4351
35.3849	35.3846	35.3836	35.3596	35.2915	35.1571	34.9331	34.6048	34.1714	33.6276	32.9708	32.2004	31.3204	30.3374	29.2614	28.1013	26.868	25.5736	24.2334	22.8638	21.4784	20.0919	18.7179	17.3665	16.0446	14.7578	13.5043	12.2807	11.0812	9.899	8.72584	7.5528	6.37215	5.17804	3.96628	2.73277	1.47833	0.204691	-1.08274	-2.37838	-3.6731	-4.95569	-6.21372	-7.43453	-8.60452	-9.70806	-10.7299	-11.6509	-12.4607	-13.1368
39.4617	39.568	39.6395	39.659	39.6096	39.4762	39.2457	38.9077	38.4548	37.8828	37.1904	36.3791	35.4533	34.42	33.2876	32.0672	30.7704	29.4105	28.0006	26.5537	25.0832	23.6014	22.1196	20.6478	19.1945	17.7664	16.368	15.0023	13.6704	12.3715	11.1036	9.86387	8.649	7.45537	6.27989	5.12036	3.97576	2.84656	1.7347	0.64393	-0.420169	-1.4501	-2.43699	-3.37018	-4.23798	-5.02674	-5.72313	-6.31234	-6.78134	-7.11726
28.8954	28.6423	28.3681	28.0658	27.7285	27.3499	26.9236	26.4429	25.9039	25.3056	24.6474	23.93	23.1547	22.3234	21.4396	20.5086	19.5364	18.5288	17.4925	16.4343	15.3616	14.2812	13.1992	12.1206	11.0492	9.98815	8.93865	7.90137	6.87538	5.85925	4.85056	3.84687	2.84562	1.84483	0.843417	-0.158403	-1.15908	-2.15554	-3.14242	-4.11303	-5.05854	-5.96814	-6.82873	-7.62759	-8.35063	-8.98244	-9.5086	-9.91794	-10.1976	-10.3282
30.7528	30.5651	30.4331	30.349	30.2999	30.2616	30.2097	30.1156	29.9444	29.6784	29.2964	28.7767	28.114	27.3134	26.3838	25.3371	24.1972	22.9875	21.7306	20.4478	19.1559	17.8706	16.6046	15.3646	14.1567	12.9833	11.8453	10.7411	9.66507	8.61519	7.58331	6.56376	5.55157	4.53998	3.52493	2.5029	1.47298	0.43432	-0.610983	-1.65643	-2.69694	-3.72173	-4.71757	-5.67093	-6.56693	-7.38539	-8.10741	-8.71956	-9.20055	-9.54511
[truncated: 50 more columns]

## Sheet: 2
25.1218	25.1237	25.0766	24.9244	24.6247	24.1493	23.4909	22.6613	21.6967	20.6405	19.5087	18.3433	17.1538	15.9535	14.7528	13.5591	12.3788	11.2311	10.0919	8.98043	7.91171	6.8715	5.85978	4.8365	3.81867	2.7879	1.73939	0.678157	-0.404182	-1.50953	-2.63038	-3.75122	-4.86862	-5.97114	-7.04691	-8.0792	-9.07884	-10.0315	-10.9466	-11.838	-12.7155	-13.5746	-14.4251	-15.2309	-15.9642	-16.5808	-17.0493	-17.3228	-17.3933	-17.2645
30.6964	31.2099	31.8989	32.6794	33.4891	34.2239	34.7748	35.0939	35.1458	34.9474	34.5262	33.911	33.1258	32.1892	31.1148	29.912	28.5928	27.1758	25.6987	24.1493	22.5838	21.0137	19.4034	17.7863	16.1552	14.5143	12.8757	11.2541	9.6644	8.1189	6.62411	5.18117	3.79059	2.45692	1.12144	-0.16063	-1.4119	-2.63338	-3.82043	-4.9939	-6.15907	-7.31459	-8.48806	-9.68609	-10.9174	-12.1494	-13.355	-14.4905	-15.5047	-16.3385
32.8557	32.8323	32.7602	32.6146	32.3798	32.0455	31.6033	31.0465	30.3766	29.5945	28.6726	27.6362	26.5049	25.2922	24.0249	22.7281	21.4234	20.124	18.8364	17.561	16.2919	15.0274	13.7455	12.4432	11.1299	9.79991	8.46138	7.11909	5.73747	4.37484	2.99253	1.62459	0.256141	-1.11943	-2.48746	-3.87279	-5.21579	-6.5163	-7.75563	-8.90162	-9.96616	-10.9207	-11.7311	-12.3996	-12.9148	-13.2456	-13.4011	-13.3808	-13.1923	-12.8464
27.5508	27.2085	26.9022	26.6915	26.5835	26.531	26.4547	26.2764	25.9193	25.3618	24.6147	23.7001	22.6875	21.643	20.6008	19.5651	18.5458	17.5281	16.4734	15.3728	14.2305	13.0374	11.8077	10.5437	9.27399	8.01188	6.78523	5.58285	4.43924	3.3425	2.29016	1.27871	0.29312	-0.675553	-1.62622	-2.56587	-3.47465	-4.32782	-5.10004	-5.77229	-6.32781	-6.76893	-7.08911	-7.30631	-7.44707	-7.52432	-7.55661	-7.54443	-7.47252	-7.31103
36.562	36.2913	35.9583	35.5486	35.0372	34.3797	33.5896	32.6821	31.6559	30.514	29.2711	27.9423	26.5358	25.0569	23.5174	21.933	20.3278	18.675	17.0074	15.3466	13.6952	12.0604	10.4509	8.87139	7.33164	5.84266	4.41366	3.04952	1.75221	0.515386	-0.658316	-1.76962	-2.81973	-3.80801	-4.73312	-5.60218	-6.41981	-7.1916	-7.92136	-8.60668	-9.2501	-9.84514	-10.3924	-10.8742	-11.2728	-11.5744	-11.7573	-11.8181	-11.7529	-11.5568
50.4692	50.4346	50.4224	50.4142	50.3323	50.1025	49.6394	49.0409	48.2791	47.3651	46.3588	45.3322	44.2822	43.1574	42.0646	40.9843	39.8993	38.7654	37.6418	36.4623	35.2254	33.9476	32.6462	31.2051	29.7725	28.3094	26.779	25.2772	23.8376	22.442	21.1264	19.8677	18.6166	17.4655	16.3572	15.2783	14.263	13.2868	12.268	11.2735	10.3412	9.32328	8.22583	7.15609	6.00666	4.8451	3.72746	2.5662	1.44668	0.359323
33.5846	33.5098	33.321	33.0017	32.5404	31.9184	31.1199	30.1659	29.0664	27.8211	26.4337	24.9439	23.3274	21.6096	19.8648	18.086	16.2871	14.4955	12.6952	10.8912	9.13303	7.42129	5.77339	4.21009	2.74171	1.35715	0.0968371	-1.05073	-2.09402	-3.04068	-3.90184	-4.69438	-5.43585	-6.14346	-6.83035	-7.50945	-8.18812	-8.86862	-9.53783	-10.198	-10.8248	-11.3891	-11.8693	-12.2349	-12.4772	-12.5761	-12.5063	-12.2735	-11.8587	-11.2742
38.3825	38.2828	38.1634	37.9674	37.6473	37.1791	36.5628	35.8143	34.9512	33.9649	32.8887	31.7277	30.5018	29.2388	27.9611	26.6836	25.412	24.1438	22.8698	21.5765	20.251	18.8826	17.4687	16.0098	14.5141	12.9911	11.4544	9.92089	8.40756	6.92831	5.49619	4.12463	2.8239	1.6031	0.469753	-0.580594	-1.55205	-2.43421	-3.25056	-3.99943	-4.65984	-5.24181	-5.7541	-6.20405	-6.5958	-6.922	-7.15441	-7.25454	-7.17798	-6.89361
32.0987	32.2254	32.2697	32.1723	31.8718	31.351	30.6178	29.6971	28.6245	27.4399	26.1824	24.8879	23.5861	22.2988	21.0388	19.8291	18.6156	17.4406	16.2578	15.0748	13.8789	12.6536	11.3917	10.0886	8.7447	7.36404	5.95424	4.53063	3.10619	1.67328	0.278251	-1.07352	-2.36589	-3.5826	-4.70474	-5.71337	-6.60259	-7.39153	-8.05048	-8.62165	-9.14171	-9.6489	-10.1684	-10.7258	-11.2942	-11.8461	-12.3322	-12.693	-12.8802	-12.8524
36.3518	36.4573	36.461	36.2964	35.9244	35.3405	34.5698	33.6521	32.6292	31.5184	30.3232	29.0577	27.7202	26.3267	24.8588	23.3736	21.8789	20.3969	18.9285	17.4671	16.0233	14.5832	13.1509	11.7052	10.2649	8.8412	7.43872	6.06479	4.72735	3.43685	2.175	0.972998	-0.173916	-1.26308	-2.29238	-3.26209	-4.17253	-5.02404	-5.81715	-6.55548	-7.24617	-7.89585	-8.50527	-9.06604	-9.56302	-9.97602	-10.2808	-10.4537	-10.4771	-10.3443
42.7618	42.7459	42.6601	42.4565	42.0972	41.5519	40.835	39.961	38.9565	37.8538	36.6842	35.4747	34.2452	33.0095	31.7788	30.5642	29.376	28.2225	27.1082	26.0361	24.9895	23.9535	22.9331	21.9127	20.8886	19.862	18.8387	17.8288	16.8429	15.8894	14.9734	14.0967	13.2569	12.4491	11.6681	10.9077	10.1644	9.43579	8.71914	7.99035	7.26291	6.53411	5.81322	5.12011	4.48251	3.93284	3.50468	3.22375	3.10803	3.17034
33.2524	33.0277	32.7225	32.3287	31.7876	31.0975	30.2934	29.3591	28.28	27.1088	25.857	24.5267	23.1422	21.7186	20.2589	18.7684	17.2546	15.719	14.1631	12.5887	10.9969	9.38932	7.76896	6.14373	4.52421	2.92371	1.3599	-0.152525	-1.59735	-2.95636	-4.21937	-5.37962	-6.42653	-7.35876	-8.18711	-8.91259	-9.54523	-10.1005	-10.5894	-11.0202	-11.398	-11.7223	-11.9801	-12.1609	-12.2468	-12.2243	-12.0877	-11.8126	-11.4095	-10.8473
40.1493	40.2546	40.2146	39.9709	39.4909	38.7682	37.8213	36.6995	35.4536	34.1423	32.7477	31.3153	29.8593	28.3404	26.8081	25.261	23.7124	22.1783	20.6743	19.2134	17.8031	16.4464	15.14	13.8805	12.6644	11.4942	10.3753	9.27949	8.23963	7.24551	6.29114	5.36745	4.46175	3.56189	2.65957	1.75283	0.810218	-0.122319	-1.11369	-2.11329	-3.12182	-4.13752	-5.15111	-6.14109	-7.08066	-7.92713	-8.63788	-9.19221	-9.57589	-9.79859
38.7206	38.625	38.4267	38.1057	37.6395	36.9865	36.1676	35.213	34.1342	32.9454	31.6749	30.3286	28.9126	27.4554	25.9684	24.4443	22.9087	21.3853	19.8593	18.3635	16.9031	15.4745	14.072	12.6874	11.3111	9.93523	8.55831	7.18232	5.8172	4.47134	3.1582	1.88851	0.669975	-0.494301	-1.60139	-2.66445	-3.69055	-4.69574	-5.69787	-6.68976	-7.67355	-8.62666	-9.5423	-10.3747	-11.0728	-11.6034	-11.9283	-12.0347	-11.9021	-11.5389
45.1182	45.4996	45.6977	45.6708	45.4028	44.9031	44.2005	43.331	42.3249	41.2006	39.9625	38.6103	37.1472	35.5969	33.9687	32.2709	30.5686	28.8638	27.1648	25.473	23.7863	22.1035	20.4269	18.7634	17.1234	15.5191	13.9632	12.4648	11.03	9.65951	8.35118	7.10579	5.92541	4.76655	3.67352	2.6232	1.60712	0.613279	-0.370033	-1.35065	-2.33005	-3.29987	-4.22812	-5.10275	-5.86025	-6.44728	-6.83021	-6.99683	-6.96091	-6.7473
36.0534	35.9105	35.6698	35.311	34.83	34.2364	33.5481	32.7841	31.9582	31.0836	30.1564	29.1658	28.1249	27.0405	25.9021	24.7232	23.5182	22.2898	21.0407	19.769	18.4712	17.1442	15.7868	14.4027	13.0108	11.5972	10.1922	8.8062	7.44606	6.12215	4.85253	3.63502	2.46362	1.37701	0.367429	-0.567448	-1.43481	-2.24664	-3.01781	-3.76459	-4.50025	-5.23235	-5.9605	-6.67379	-7.35063	-7.96113	-8.47354	-8.85961	-9.1004	-9.18613
27.9637	27.9421	27.8417	27.6199	27.2475	26.7296	26.0918	25.3684	24.59	23.7767	22.9349	22.0598	21.1428	20.1791	19.172	18.1326	17.0752	16.0093	14.9401	13.8411	12.7287	11.5885	10.4196	9.22762	8.02288	6.81677	5.62443	4.4552	3.30157	2.18614	1.12057	0.105942	-0.852508	-1.75208	-2.59141	-3.37613	-4.11504	-4.81763	-5.49939	-6.17759	-6.84966	-7.52336	-8.19615	-8.85796	-9.48914	-10.058	-10.5227	-10.8379	-10.9651	-10.8831
26.9013	26.8802	26.868	26.8223	26.6919	26.4267	25.9878	25.3465	24.4903	23.4344	22.1968	20.8126	19.3409	17.8221	16.3321	14.9332	13.661	12.5041	11.4542	10.4784	9.5305	8.56965	7.5631	6.4896	5.34075	4.1335	2.86983	1.5695	0.281237	-0.959193	-2.11213	-3.16691	-4.09425	-4.90143	-5.60168	-6.21628	-6.79103	-7.33986	-7.90589	-8.49809	-9.14058	-9.84395	-10.6068	-11.4159	-12.2476	-13.0711	-13.853	-14.556	-15.1598	-15.6194
30.9664	31.2775	31.5517	31.7163	31.717	31.522	31.1195	30.5135	29.7192	28.7568	27.6469	26.4082	25.0606	23.6285	22.1411	20.6313	19.1267	17.6204	16.1495	14.6961	13.2457	11.7823	10.2939	8.78779	7.22819	5.66667	4.1071	2.57325	1.07871	-0.373949	-1.74333	-3.04361	-4.26962	-5.39319	-6.41049	-7.31264	-8.09044	-8.7389	-9.26049	-9.66883	-9.98377	-10.23	-10.4307	-10.5976	-10.7253	-10.7914	-10.7635	-10.6101	-10.3078	-9.84309
32.2716	32.2713	32.1602	31.9262	31.5609	31.0762	30.4862	29.7941	29.001	28.121	27.158	26.1325	25.0464	23.9193	22.7707	21.575	20.3389	19.0654	17.7545	16.4105	15.0451	13.6716	12.2665	10.8699	9.4848	8.08557	6.71849	5.38696	4.06597	2.78286	1.53344	0.300165	-0.901903	-2.08844	-3.26605	-4.43742	-5.59726	-6.72497	-7.81757	-8.85082	-9.80351	-10.6746	-11.4639	-12.172	-12.7912	-13.2961	-13.66	-13.8612	-13.8753	-13.6962
44.3548	44.504	44.531	44.387	44.0464	43.5057	42.7763	41.8718	40.8095	39.6092	38.2862	36.859	35.3538	33.7926	32.1728	30.5515	28.9294	27.3138	25.7066	24.1083	22.519	20.9349	19.3555	17.7843	16.2263	14.6882	13.1795	11.7099	10.2902	8.93115	7.64114	6.42451	5.28244	4.20743	3.19435	2.22501	1.28345	0.352312	-0.583713	-1.53162	-2.5116	-3.51286	-4.5119	-5.4851	-6.39773	-7.21705	-7.90926	-8.43095	-8.75033	-8.84317
32.874	33.0978	33.218	33.1622	32.9035	32.4558	31.8551	31.134	30.3063	29.3672	28.3047	27.118	25.8283	24.4759	23.1044	21.7514	20.4439	19.1924	17.9948	16.8467	15.7447	14.6871	13.67	12.6871	11.7295	10.7883	9.85502	8.92258	7.98852	7.05543	6.13008	5.22302	4.34616	3.50888	2.71588	1.96106	1.23041	0.500981	-0.259498	-1.08358	-1.9915	-2.97922	-4.01032	-5.06098	-6.04637	-6.90897	-7.58645	-8.03845	-8.25609	-8.25969
30.9753	31.1191	31.0281	30.6785	30.0798	29.2606	28.2573	27.1063	25.8389	24.4833	23.0606	21.5898	20.0906	18.5804	17.069	15.5561	14.0315	12.4799	10.889	9.25306	7.57593	5.87186	4.16377	2.48161	0.857033	-0.68506	-2.12668	-3.45966	-4.67885	-5.7765	-6.76591	-7.6451	-8.42712	-9.14355	-9.82601	-10.5073	-11.2091	-11.9445	-12.7177	-13.5225	-14.3384	-15.1271	-15.8346	-16.4024	-16.7788	-16.9162	-16.7982	-16.4299	-15.8033	-14.9367
30.9705	31.0675	31.0551	30.9073	30.6097	30.1594	29.5609	28.8305	27.9955	27.0785	26.0945	25.054	23.9684	22.8326	21.6489	20.4329	19.1841	17.9103	16.619	15.3167	14.0073	12.6949	11.3821	10.0775	8.77596	7.47916	6.21021	4.97202	3.77513	2.63192	1.55475	0.555995	-0.350735	-1.16225	-1.86821	-2.48007	-3.00729	-3.47428	-3.90512	-4.3251	-4.75313	-5.19774	-5.65448	-6.10537	-6.51873	-6.85251	-7.07237	-7.1454	-7.05663	-6.8187
52.5753	53.1068	53.4846	53.6231	53.4809	53.044	52.3163	51.3252	50.123	48.7768	47.3078	45.7559	44.1619	42.5366	40.8982	39.2688	37.6166	35.9969	34.4033	32.8364	31.2965	29.7992	28.3009	26.8299	25.3888	23.9704	22.5771	21.2173	19.8872	18.5947	17.319	16.0885	14.908	13.7661	12.6549	11.5412	10.4537	9.37862	8.33371	7.29956	6.30847	5.37154	4.49628	3.70143	3.01238	2.442	2.04131	1.84834	1.87448	2.1145
41.4511	41.6123	41.7709	41.8649	41.8158	41.5691	41.0919	40.3777	39.4452	38.3325	37.0874	35.7577	34.3859	33.0076	31.6509	30.3369	29.0803	27.8877	26.7553	25.6683	24.6041	23.535	22.432	21.2702	20.0378	18.7399	17.3943	16.0272	14.6749	13.3571	12.0923	10.9135	9.81522	8.79084	7.829	6.91724	6.04774	5.21804	4.42789	3.67563	2.95519	2.25624	1.56697	0.879954	0.20143	-0.465809	-1.08836	-1.62496	-2.03277	-2.26732
34.3034	34.1433	33.8207	33.3559	32.7726	32.0922	31.3305	30.4945	29.5865	28.6115	27.5747	26.4809	25.333	24.1369	22.8838	21.5594	20.1811	18.7412	17.2449	15.703	14.1319	12.5507	10.979	9.4328	7.92696	6.47351	5.08581	3.77244	2.53954	1.38807	0.308928	-0.711506	-1.69217	-2.65411	-3.60776	-4.58374	-5.56939	-6.559	-7.54113	-8.49891	-9.41492	-10.271	-11.0471	-11.7199	-12.2656	-12.6732	-12.9414	-13.0749	-13.0911	-12.9965
32.5618	33.2275	33.7247	34.0061	34.0453	33.835	33.3776	32.6669	31.7414	30.6125	29.3031	27.8431	26.2635	24.5958	22.8682	21.1198	19.3204	17.5127	15.704	13.8904	12.0753	10.283	8.49092	6.73883	5.04498	3.40286	1.86335	0.418531	-0.926162	-2.17245	-3.32572	-4.39551	-5.39797	-6.35357	-7.28797	-8.23401	-9.22519	-10.2945	-11.4654	-12.7461	-14.1231	-15.5625	-17.0028	-18.3933	-19.6707	-20.7367	-21.5461	-22.0718	-22.3076	-22.2542
36.8017	36.9284	36.9055	36.6966	36.2996	35.7399	35.0566	34.2902	33.4713	32.5958	31.682	30.7003	29.6378	28.5064	27.323	26.1101	24.8907	23.6752	22.4578	21.2224	19.9517	18.6331	17.2612	15.8412	14.3878	12.9185	11.4486	9.98532	8.52796	7.07402	5.62541	4.19052	2.78169	1.41178	0.095046	-1.15519	-2.3265	-3.40887	-4.39722	-5.29426	-6.10914	-6.85474	-7.55984	-8.21324	-8.81822	-9.3575	-9.79668	-10.0896	-10.1937	-10.0826
42.2514	42.1751	41.9784	41.6353	41.1348	40.5007	39.7548	38.9227	38.024	37.0709	36.0647	34.9925	33.8573	32.6594	31.4011	30.0896	28.7344	27.3475	25.9443	24.5411	23.1545	21.7987	20.4812	19.2096	17.9587	16.7377	15.5291	14.3281	13.1434	11.9686	10.8311	9.7425	8.71753	7.76566	6.89313	6.0843	5.34179	4.65875	4.02862	3.42661	2.83553	2.23963	1.65831	1.08673	0.568082	0.154176	-0.118878	-0.209424	-0.107204	0.169004
34.6811	34.6065	34.4038	34.0463	33.5387	32.8993	32.1468	31.295	30.3519	29.3261	28.2221	27.0433	25.7984	24.4862	23.1278	21.7474	20.3438	18.9348	17.5284	16.1308	14.748	13.3839	12.0387	10.7083	9.38625	8.06653	6.74638	5.4295	4.12804	2.85838	1.64302	0.477422	-0.613699	-1.62965	-2.57448	-3.46131	-4.30358	-5.1181	-5.92184	-6.73066	-7.55785	-8.41123	-9.28716	-10.1695	-11.0311	-11.8383	-12.5511	-13.1286	-13.5436	-13.781
30.7934	30.9829	31.1681	31.2444	31.1247	30.7754	30.2065	29.4493	28.5144	27.4256	26.1824	24.8181	23.3714	21.8897	20.418	18.9878	17.6105	16.2845	14.9986	13.726	12.4539	11.1861	9.92342	8.67503	7.44917	6.24013	5.0419	3.85265	2.65689	1.44824	0.230415	-0.982253	-2.19884	-3.37688	-4.50826	-5.57999	-6.58058	-7.50316	-8.35892	-9.14987	-9.88343	-10.5716	-11.2342	-11.8616	-12.468	-13.0232	-13.5029	-13.8725	-14.1073	-14.1945
36.796	37.2349	37.6762	37.9994	38.1169	37.9829	37.5932	36.9746	36.1692	35.2184	34.1554	33.0046	31.7867	30.5231	29.2329	27.928	26.6121	25.2829	23.9355	22.5664	21.1754	19.767	18.3493	16.9311	15.5195	14.118	12.7335	11.3639	9.98565	8.61741	7.26669	5.93089	4.61928	3.34484	2.12395	0.969073	-0.111189	-1.11605	-2.05287	-2.94014	-3.79826	-4.64529	-5.49265	-6.34356	-7.19232	-8.01985	-8.78797	-9.43827	-9.90665	-10.1403
35.8079	35.7872	35.8896	36.0507	36.192	36.2159	36.055	35.6697	35.0364	34.1778	33.1212	31.9031	30.5713	29.1433	27.6572	26.1397	24.5972	23.0356	21.458	19.8792	18.2683	16.657	15.0486	13.4479	11.8619	10.2958	8.7519	7.229	5.72346	4.23154	2.75185	1.28656	-0.159262	-1.57852	-2.95172	-4.31119	-5.61807	-6.87963	-8.09358	-9.25712	-10.3682	-11.4195	-12.4255	-13.3788	-14.2661	-15.0793	-15.7949	-16.3817	-16.8092	-17.0531
40.6257	41.5977	42.5036	43.1928	43.5319	43.4974	43.129	42.5002	41.6838	40.7348	39.6857	38.5507	37.33	36.0177	34.6096	33.1097	31.5371	29.9205	28.2897	26.6731	25.0873	23.5369	21.9929	20.4369	18.8629	17.2682	15.6204	13.9608	12.2861	10.6045	8.92504	7.25666	5.60934	3.99412	2.42484	0.913737	-0.528827	-1.89625	-3.18502	-4.39438	-5.5235	-6.57672	-7.57735	-8.51132	-9.38751	-10.2022	-10.9402	-11.5689	-12.0424	-12.3191
39.0602	39.0771	39.0079	38.8165	38.4805	37.9907	37.3481	36.5575	35.6272	34.5786	33.4253	32.177	30.869	29.4578	27.944	26.4256	24.8359	23.2124	21.6126	20.0391	18.5033	17.0094	15.5532	14.1206	12.6951	11.2599	9.8113	8.34074	6.79807	5.27224	3.71644	2.1783	0.671969	-0.791645	-2.19274	-3.51149	-4.75563	-5.91288	-6.96172	-7.90936	-8.75714	-9.52468	-10.226	-10.8523	-11.4021	-11.8595	-12.1989	-12.4073	-12.4735	-12.4002
45.0255	45.462	45.8063	45.9836	45.9401	45.6561	45.1439	44.4357	43.5687	42.5733	41.4706	40.2749	38.9964	37.641	36.2121	34.7128	33.15	31.5362	29.889	28.2281	26.5714	24.9421	23.3313	21.7541	20.2282	18.7496	17.317	15.9262	14.5719	13.2481	11.9499	10.6729	9.41392	8.17059	6.9396	5.71473	4.48993	3.26392	2.04176	0.834422	-0.342481	-1.46863	-2.5205	-3.47564	-4.31585	-5.0254	-5.58508	-5.9697	-6.15245	-6.11519
40.4285	40.1663	39.8687	39.5065	39.0516	38.4563	37.7223	36.8691	35.9034	34.8295	33.6657	32.4354	31.155	29.8374	28.4958	27.1438	25.7929	24.4514	23.1249	21.8157	20.5204	19.2334	17.948	16.6589	15.3644	14.068	12.7776	11.5052	10.2631	9.06365	7.91986	6.83771	5.81597	4.85171	3.94525	3.0815	2.25253	1.45116	0.673842	-0.0799157	-0.804098	-1.48744	-2.10948	-2.64751	-3.07008	-3.35013	-3.45153	-3.3682	-3.08714	-2.63039
51.5599	51.759	51.7875	51.6127	51.2249	50.6172	49.7895	48.7865	47.6452	46.397	45.0639	43.6589	42.1915	40.6706	39.1051	37.5078	35.8864	34.2166	32.5363	30.8317	29.0943	27.3175	25.5011	23.6511	21.7814	19.9141	18.0764	16.3	14.6072	13.0144	11.5323	10.1633	8.91181	7.76693	6.7305	5.79217	4.95477	4.20747	3.542	2.94568	2.39247	1.88576	1.41269	0.974968	0.58551	0.269623	0.051462	-0.0409704	0.0133736	0.218382
42.8023	42.7676	42.6477	42.3599	41.8481	41.0943	40.1188	38.969	37.7034	36.3776	35.0422	33.6925	32.378	31.0784	29.7931	28.5323	27.2936	26.0805	24.8956	23.7381	22.6026	21.4875	20.3554	19.2132	18.0436	16.8499	15.6042	14.3495	13.0955	11.8652	10.6809	9.56003	8.51395	7.54631	6.65279	5.82028	5.03167	4.27257	3.52648	2.7794	2.03283	1.28061	0.531777	-0.230872	-0.971588	-1.67648	-2.31313	-2.84009	-3.2111	-3.38271
39.1141	39.8907	40.4999	40.8761	40.992	40.852	40.4765	39.8877	39.1008	38.1342	36.9786	35.6662	34.2238	32.6779	31.0608	29.4019	27.7229	26.049	24.339	22.6223	20.9057	19.1262	17.3406	15.5352	13.7371	11.8987	10.0841	8.2801	6.49159	4.72432	2.98518	1.28203	-0.360396	-1.97118	-3.54116	-5.0381	-6.47719	-7.85436	-9.19155	-10.4983	-11.7628	-12.9879	-14.1636	-15.2901	-16.3247	-17.2418	-17.9718	-18.4754	-18.7233	-18.7128
34.5345	34.7829	34.9302	34.9279	34.7502	34.3965	33.8708	33.2023	32.4082	31.5054	30.5066	29.4277	28.2726	27.0553	25.8058	24.5333	23.2498	21.9632	20.6552	19.3239	18.0092	16.702	15.4088	14.1315	12.8667	11.6145	10.3786	9.15306	7.97209	6.84308	5.78662	4.79963	3.893	3.06906	2.31468	1.61468	0.946239	0.286842	-0.363755	-1.01011	-1.64712	-2.2674	-2.86104	-3.41302	-3.89697	-4.28748	-4.53308	-4.58561	-4.40524	-3.98417
26.627	26.9786	27.2581	27.3848	27.3047	26.9996	26.4812	25.7778	24.9187	23.9243	22.8045	21.5642	20.2099	18.7675	17.2331	15.6661	14.094	12.5436	11.0327	9.56505	8.13363	6.72344	5.31723	3.90121	2.46793	1.02344	-0.43725	-1.90848	-3.36504	-4.80398	-6.21553	-7.58994	-8.91779	-10.1895	-11.3938	-12.5211	-13.5639	-14.5198	-15.3918	-16.1882	-16.9185	-17.5895	-18.204	-18.758	-19.2389	-19.6399	-19.923	-20.0588	-20.0111	-19.7486
36.167	36.3609	36.4843	36.4633	36.2387	35.7708	35.0399	34.0448	32.8125	31.3912	29.8318	28.1797	26.4708	24.7332	22.9899	21.2584	19.5618	17.89	16.2502	14.6743	13.1512	11.6454	10.2118	8.82973	7.48605	6.20497	4.98201	3.8189	2.71866	1.67959	0.697092	-0.235993	-1.13003	-1.99497	-2.83399	-3.64328	-4.42299	-5.17575	-5.87093	-6.50954	-7.09226	-7.62131	-8.09591	-8.50866	-8.83622	-9.03959	-9.06312	-8.84281	-8.34738	-7.56715
35.1084	35.1529	35.1271	34.984	34.6914	34.2356	33.6267	32.8873	32.0626	31.1744	30.2746	29.3544	28.4141	27.4624	26.4667	25.4217	24.3458	23.2281	22.0696	20.8716	19.6377	18.3758	17.1005	15.8313	14.5894	13.3951	12.2656	11.2099	10.2327	9.33418	8.5105	7.75654	7.06671	6.43625	5.85742	5.31336	4.80367	4.31644	3.84773	3.37661	2.90691	2.42282	1.93731	1.46057	1.01883	0.647842	0.386804	0.273004	0.337276	0.599846
41.6431	41.9467	42.1382	42.1903	42.0814	41.776	41.3003	40.6966	39.9855	39.1839	38.3213	37.4045	36.4377	35.4389	34.401	33.3273	32.2222	31.091	29.9383	28.7671	27.579	26.3717	25.1418	23.887	22.6096	21.3156	20.0163	18.7387	17.4714	16.2551	15.1159	14.068	13.1244	12.2916	11.5737	10.9575	10.4315	9.97448	9.55993	9.16384	8.76796	8.36166	7.94804	7.54293	7.17479	6.87789	6.70164	6.66777	6.80483	7.10767
39.5749	40.0853	40.4992	40.703	40.6264	40.2517	39.6131	38.7467	37.73	36.5768	35.3351	34.0143	32.6308	31.1674	29.6592	28.1091	26.5307	24.9321	23.3132	21.6714	20.0036	18.3072	16.5836	14.8409	13.0916	11.3477	9.62027	7.9185	6.25157	4.63033	3.06731	1.57544	0.167657	-1.14454	-2.35239	-3.45343	-4.45111	-5.35471	-6.17953	-6.94654	-7.67999	-8.39946	-9.11274	-9.81318	-10.4744	-11.0581	-11.5098	-11.7725	-11.8285	-11.6855
31.9625	31.9283	31.9019	31.829	31.645	31.2989	30.7593	30.0386	29.1805	28.2414	27.266	26.2774	25.2807	24.2719	23.2496	22.207	21.1479	20.0973	19.0572	18.0226	17.0013	15.9726	14.9187	13.8252	12.6839	11.4947	10.2641	9.0057	7.73591	6.47152	5.22844	4.02123	2.86205	1.76019	0.722597	-0.248065	-1.14976	-1.97948	-2.73231	-3.40315	-3.99251	-4.51183	-4.98279	-5.42925	-5.87012	-6.31197	-6.74045	-7.11588	-7.3813	-7.47843
39.3827	39.2649	39.1791	39.0718	38.8825	38.5625	38.0872	37.4674	36.7339	35.9463	35.1625	34.3843	33.6128	32.8049	31.9286	30.9731	29.9433	28.8696	27.7547	26.643	25.5358	24.4296	23.3132	22.1807	20.9834	19.7699	18.4958	17.2117	15.924	14.6528	13.4143	12.219	11.0786	9.96937	8.91318	7.90298	6.94011	6.01556	5.16059	4.37294	3.65471	2.9887	2.36006	1.77245	1.21301	0.682851	0.177139	-0.265369	-0.610324	-0.82514
30.4795	30.2561	29.9655	29.5894	29.1077	28.5084	27.7964	26.9862	26.0947	25.1403	24.1345	23.0862	22.0012	20.8885	19.7496	18.5667	17.3779	16.1938	15.0124	13.7753	12.566	11.382	10.217	9.07619	7.96232	6.87811	5.8256	4.80804	3.82774	2.88669	1.98996	1.14251	0.345239	-0.390326	-1.07258	-1.70374	-2.29056	-2.82913	-3.33319	-3.81033	-4.2671	-4.70651	-5.11679	-5.48602	-5.79209	-6.0031	-6.09577	-6.05373	-5.85914	-5.51163
34.114	34.3633	34.544	34.5861	34.4186	34.0121	33.3696	32.5202	31.5143	30.3952	29.186	27.9416	26.6686	25.3725	24.0519	22.7029	21.3216	19.9041	18.4473	16.9475	15.4013	13.8035	12.1517	10.4474	8.70058	6.92523	5.14203	3.37647	1.65622	0.00709091	-1.54843	-2.99171	-4.31285	-5.50608	-6.5649	-7.49562	-8.30481	-8.99541	-9.59976	-10.1326	-10.6086	-11.0563	-11.4947	-11.9302	-12.3531	-12.736	-13.0383	-13.2211	-13.2512	-13.1061
23.1402	22.5549	22.0324	21.5194	20.9492	20.2729	19.4796	18.5923	17.6503	16.6878	15.7224	14.7544	13.776	12.78	11.7625	10.7199	9.64681	8.53728	7.3887	6.20335	4.98789	3.75208	2.50712	1.26236	0.0229418	-1.21142	-2.44493	-3.68151	-4.92192	-6.16185	-7.38985	-8.58583	-9.72271	-10.7717	-11.7067	-12.5147	-13.1945	-13.7613	-14.2471	-14.695	-15.1478	-15.6353	-16.166	-16.7244	-17.2724	-17.7531	-18.0967	-18.2303	-18.0916	-17.6433
31.1236	31.355	31.6053	31.7779	31.7969	31.6051	31.1718	30.4959	29.6027	28.5393	27.3544	26.0744	24.7032	23.2671	21.7903	20.2776	18.7439	17.2013	15.6665	14.1398	12.6042	11.108	9.59184	8.07226	6.53826	4.97041	3.35892	1.70234	0.00588047	-1.71389	-3.43191	-5.10589	-6.72594	-8.25941	-9.66022	-10.9536	-12.0952	-13.0986	-13.9785	-14.7499	-15.4331	-16.0487	-16.6132	-17.1318	-17.6005	-18.003	-18.2826	-18.3891	-18.2802	-17.9292
50.4035	50.9063	51.3374	51.6027	51.6276	51.353	50.7398	49.8069	48.6077	47.1865	45.5804	43.8157	41.9204	39.9398	37.9016	35.7573	33.578	31.4471	29.3353	27.2404	25.213	23.2418	21.3333	19.494	17.7317	16.0504	14.455	12.9444	11.5129	10.1526	8.8539	7.61494	6.40262	5.21652	4.06716	2.94574	1.86473	0.827163	-0.184773	-1.13124	-2.02317	-2.86398	-3.65934	-4.41576	-5.1342	-5.80623	-6.41695	-6.94458	-7.3483	-7.59536
44.9394	45.3777	45.6286	45.6566	45.4573	45.0387	44.4308	43.6624	42.7591	41.7388	40.6122	39.3875	38.0805	36.6883	35.2223	33.7069	32.1428	30.5442	28.8968	27.2153	25.5009	23.7916	22.0934	20.4224	18.7947	17.2246	15.7232	14.2971	12.951	11.6852	10.4935	9.36596	8.28733	7.23799	6.19658	5.14446	4.06952	2.96603	1.83397	0.679052	-0.485073	-1.63808	-2.77637	-3.84407	-4.80941	-5.62221	-6.22945	-6.59067	-6.69061	-6.54044
28.9719	28.9605	28.8883	28.7213	28.4405	28.0414	27.5272	26.901	26.1577	25.2875	24.2852	23.1575	21.9223	20.606	19.236	17.8348	16.4139	14.9744	13.5117	12.0226	10.5114	8.98554	7.45578	5.93428	4.43578	2.97421	1.56353	0.214184	-1.06369	-2.26645	-3.38993	-4.4319	-5.39907	-6.30246	-7.15165	-7.96035	-8.73618	-9.48585	-10.2141	-10.9187	-11.5907	-12.2089	-12.7613	-13.2207	-13.5514	-13.7226	-13.6944	-13.4395	-12.9532	-12.2432
40.362	40.6114	40.8093	40.9235	40.8926	40.6353	40.1976	39.5815	38.7741	37.8095	36.7094	35.4751	34.1258	32.6967	31.1973	29.6467	28.0615	26.459	24.8544	23.2595	21.6935	20.1289	18.5756	17.0446	15.5256	14.0219	12.5409	11.0934	9.69403	8.35472	7.08383	5.88423	4.75403	3.68563	2.67098	1.70129	0.768571	-0.125547	-0.99348	-1.83902	-2.6258	-3.37817	-4.05945	-4.64121	-5.09971	-5.40252	-5.52598	-5.44129	-5.16073	-4.68817
[truncated: 50 more columns]
