# Supplementary material for: Comparison of sagittal plane gait characteristics between the overground and treadmill approach for gait analysis in typically developing children
Source: PeerJ. 2022 Jul 22;10:e13752. doi: 10.7717/peerj.13752 (PMC9310770; doi:10.7717/peerj.13752)
Supplement: Supplemental Information 10 — Each colum represents a percentage of the gait cycle (0–100%). Every raw represents data of one child.Sheet 1 data of the overground approachSheet 2 data of the treadmill approach [file peerj-10-13752-s010.xlsx]

## Sheet: 1
1.26293	0.48716	-0.259475	-0.882753	-1.31584	-1.52434	-1.49868	-1.24833	-0.798036	-0.183789	0.544302	1.3452	2.17856	3.01035	3.81475	4.57586	5.28715	5.95076	6.57481	7.17024	7.74788	8.31513	8.87792	9.43851	9.99451	10.5428	11.0798	11.6032	12.1136	12.6089	13.0905	13.5606	14.0204	14.4707	14.9125	15.347	15.7753	16.1981	16.6148	17.0225	17.4248	17.7985	18.1425	18.4454	18.6934	18.8687	18.9496	18.9072	18.7051	18.2975
5.46342	4.59197	3.7206	3.03025	2.67864	2.76226	3.30384	4.2595	5.53386	6.99923	8.51661	9.95698	11.2198	12.2433	13.0035	13.5047	13.769	13.8247	13.7013	13.4244	13.0168	12.4981	11.8878	11.2069	10.4798	9.73366	8.9928	8.28088	7.61749	7.02042	6.49926	6.06252	5.71428	5.4546	5.27954	5.1863	5.1612	5.19467	5.27562	5.40003	5.55306	5.73643	5.93516	6.14426	6.35486	6.55633	6.73454	6.87043	6.93697	6.89664
7.82834	6.81915	5.82198	4.92413	4.19743	3.74631	3.61775	3.79042	4.24831	4.94131	5.77128	6.67972	7.61671	8.54058	9.43009	10.2624	11.0245	11.7184	12.3469	12.9214	13.4605	13.98	14.4916	14.9978	15.4951	15.978	16.4428	16.8852	17.3025	17.6909	18.045	18.3608	18.6379	18.8736	19.068	19.221	19.336	19.4138	19.4543	19.462	19.4402	19.3917	19.3178	19.2147	19.0749	18.8831	18.6169	18.2455	17.739	17.0608
9.71161	9.00692	8.11791	7.15467	6.22465	5.4138	4.77996	4.3524	4.13363	4.1042	4.23049	4.47286	4.79192	5.15221	5.52355	5.88112	6.20491	6.47974	6.69464	6.84194	6.92038	6.93266	6.88599	6.79126	6.66331	6.51769	6.37007	6.23529	6.12677	6.05603	6.03166	6.05879	6.13895	6.26973	6.44535	6.65753	6.89668	7.15317	7.41791	7.68334	7.94349	8.19371	8.43068	8.65136	8.85208	9.0258	9.16017	9.23344	9.2116	9.04619
3.80016	2.76885	1.98039	1.51678	1.42185	1.74451	2.46956	3.47567	4.67796	6.00306	7.35681	8.64965	9.82178	10.8349	11.6711	12.3259	12.8107	13.1622	13.4033	13.5604	13.6489	13.6903	13.6977	13.6801	13.6443	13.5966	13.5449	13.4968	13.4577	13.4314	13.4208	13.4292	13.4545	13.4917	13.5369	13.5878	13.6352	13.6697	13.687	13.6815	13.649	13.5746	13.4483	13.2682	13.0251	12.7068	12.2976	11.767	11.0931	10.2347
13.4352	11.253	8.67656	6.16572	4.17441	3.03537	2.81996	3.24225	4.14248	5.31685	6.57991	7.79457	8.88272	9.79324	10.4937	10.9911	11.3402	11.6231	11.8869	12.1715	12.5109	12.9125	13.3361	13.7687	14.1966	14.6028	14.9815	15.3598	15.7416	16.1177	16.4617	16.7857	17.1305	17.5419	17.9994	18.4888	18.9897	19.5025	20.014	20.4803	20.9012	21.2496	21.5733	21.8723	22.1219	22.3277	22.4945	22.6193	22.6899	22.6866
4.87166	3.8981	3.01251	2.29513	1.76013	1.42861	1.33867	1.50993	1.92972	2.57907	3.40088	4.32836	5.29282	6.23322	7.11361	7.89354	8.55445	9.08574	9.5022	9.81277	10.0296	10.1635	10.2221	10.2192	10.1749	10.1083	10.0417	9.99013	9.96206	9.96516	10.0009	10.0654	10.1572	10.2798	10.4338	10.6175	10.8286	11.0632	11.3175	11.5865	11.8635	12.1389	12.3999	12.6334	12.8193	12.9312	12.9386	12.8115	12.5131	11.9773
3.43498	2.62938	1.74939	0.905103	0.17898	-0.3483	-0.576029	-0.469748	-0.118878	0.460559	1.17701	2.02807	2.89288	3.73394	4.50855	5.20435	5.8253	6.38568	6.8995	7.38287	7.84239	8.28796	8.72295	9.14934	9.5669	9.97533	10.3752	10.7673	11.153	11.5265	11.8987	12.2609	12.6166	12.9737	13.3304	13.6911	14.0616	14.436	14.8139	15.1887	15.5512	15.9062	16.2387	16.5469	16.8225	17.0414	17.1882	17.2354	17.1435	16.8661
2.19813	1.58077	0.671563	-0.0281537	-0.484845	-0.818721	-0.978795	-0.964818	-0.746582	-0.330206	0.208074	0.827778	1.48298	2.11662	2.71374	3.2568	3.74652	4.19998	4.5984	4.93838	5.20393	5.40572	5.56166	5.67596	5.76429	5.87089	5.95206	6.04653	6.15098	6.24602	6.37551	6.51996	6.69601	6.88938	7.11728	7.40549	7.73619	8.13408	8.60296	9.14012	9.72909	10.3494	11.0043	11.639	12.2501	12.7882	13.2353	13.5724	13.7755	13.8163
4.92565	3.16432	1.30439	1.13206	1.30006	1.24741	0.99108	1.40102	2.29917	3.42956	4.59189	5.70274	6.60884	7.39958	8.10135	8.59802	9.049	9.4572	9.87962	10.3646	10.8312	11.2544	11.6125	11.9232	12.2042	12.4489	12.6748	12.9002	13.1312	13.4127	13.6723	13.9365	14.2184	14.492	14.7755	15.0295	15.2859	15.4605	15.6531	15.896	16.1274	16.4083	16.7575	17.202	17.6793	18.1015	18.4704	18.7316	18.8279	18.798
-1.07705	-1.50171	-2.13127	-2.88902	-3.75535	-4.64464	-5.39381	-5.83916	-5.89792	-5.68733	-5.39741	-5.05916	-4.6157	-4.1156	-3.60318	-3.05291	-2.49439	-1.86146	-1.28355	-0.712229	-0.190275	0.353268	0.808087	1.21775	1.62559	2.01339	2.41296	2.84751	3.24359	3.65299	4.14173	4.58317	5.00206	5.41697	5.84009	6.25158	6.68746	7.09505	7.51282	7.9775	8.40394	8.78889	9.16762	9.51463	9.8313	10.0839	10.2577	10.3169	10.2881	10.1767
8.55251	7.55419	6.59024	5.71908	5.06682	4.63872	4.48922	4.58908	4.92526	5.48303	6.19071	7.01055	7.89636	8.79763	9.6756	10.5014	11.254	11.9129	12.4755	12.9425	13.3122	13.5988	13.8121	13.956	14.045	14.0974	14.1254	14.1414	14.1545	14.1737	14.2076	14.2634	14.3444	14.4569	14.5979	14.77	14.9663	15.182	15.4074	15.6257	15.8218	15.9746	16.0556	16.0335	15.8917	15.5865	15.0825	14.3657	13.4051	12.203
5.57606	3.34232	1.39217	-0.0332357	-0.722991	-0.591644	0.235688	1.56515	3.1926	4.92406	6.60529	8.11864	9.40846	10.4561	11.2566	11.8308	12.2083	12.4361	12.553	12.5948	12.5834	12.5544	12.4894	12.4104	12.3213	12.2203	12.1135	12.0089	11.9148	11.8244	11.7358	11.6397	11.5197	11.373	11.2047	11.0056	10.7863	10.5641	10.3263	10.0809	9.8285	9.56938	9.30589	9.04022	8.76783	8.48119	8.17025	7.81785	7.40067	6.89073
9.08928	8.09061	7.10425	6.16647	5.34999	4.72459	4.38127	4.4047	4.76035	5.37613	6.18621	7.16331	8.19176	9.19375	10.1137	10.9163	11.5654	12.0758	12.4759	12.801	13.0799	13.3456	13.6372	13.9657	14.3325	14.733	15.1623	15.6066	16.0469	16.4649	16.8595	17.2092	17.5315	17.8358	18.1285	18.4166	18.7018	18.9714	19.2232	19.4536	19.6716	19.8199	19.9136	19.9727	19.9948	19.9678	19.8917	19.7996	19.6215	19.3366
7.85227	6.64429	5.23014	3.77205	2.45729	1.44336	0.827455	0.632793	0.82062	1.3045	1.99514	2.81733	3.70035	4.57621	5.38459	6.08188	6.65537	7.11606	7.49527	7.82805	8.14353	8.4627	8.79284	9.13556	9.4872	9.84003	10.1887	10.532	10.8723	11.2172	11.5828	11.9773	12.4033	12.8665	13.3662	13.8957	14.4436	14.9965	15.5421	16.0762	16.6019	17.1201	17.6312	18.1376	18.633	19.1045	19.5283	19.8628	20.0687	20.1504
8.40147	8.06179	7.6646	7.23661	6.80727	6.40579	6.05862	5.78738	5.60737	5.52656	5.54531	5.65683	5.84861	6.104	6.40397	6.72948	7.06437	7.39484	7.7109	8.00576	8.27644	8.52174	8.74206	8.93869	9.11337	9.26828	9.40574	9.52785	9.63711	9.73657	9.8297	9.92078	10.0153	10.12	10.2428	10.3922	10.5774	10.8075	11.0894	11.4279	11.8244	12.2758	12.7723	13.2986	13.8332	14.3481	14.8095	15.1783	15.4113	15.4644
8.03928	7.50085	6.88257	6.22489	5.58242	5.00934	4.55888	4.26912	4.16609	4.2539	4.51715	4.92762	5.45125	6.047	6.67949	7.31707	7.93724	8.52106	9.05902	9.54918	9.99169	10.3941	10.7625	11.106	11.4334	11.7507	12.0636	12.3746	12.6848	12.9945	13.304	13.6138	13.923	14.2298	14.5306	14.8242	15.1087	15.3839	15.6511	15.9143	16.1725	16.4291	16.684	16.9136	17.0934	17.2443	17.3266	17.3444	17.2705	17.0588
6.01771	5.27716	4.51507	3.80149	3.18016	2.68597	2.34976	2.19574	2.23248	2.44649	2.80675	3.26706	3.77719	4.29033	4.77201	5.20377	5.58314	5.91977	6.22977	6.53021	6.83162	7.14221	7.46358	7.79332	8.12662	8.45847	8.78585	9.10961	9.4328	9.75705	10.083	10.4122	10.7473	11.0912	11.4469	11.8175	12.2062	12.614	13.0384	13.4736	13.9144	14.3588	14.8173	15.2673	15.7145	16.1553	16.5825	16.9808	17.328	17.5935
14.1995	13.3514	12.4663	11.6333	10.9339	10.4184	10.1068	9.99119	10.0436	10.2223	10.4844	10.7909	11.108	11.4089	11.6755	11.9011	12.09	12.2569	12.4184	12.5885	12.7752	12.9801	13.1992	13.4255	13.6485	13.8583	14.0467	14.208	14.3404	14.4446	14.5241	14.5859	14.6396	14.696	14.7671	14.8661	15.0054	15.1965	15.4467	15.7592	16.1324	16.5588	17.0235	17.505	17.9735	18.3924	18.7197	18.9095	18.9142	18.6849
6.41877	5.74121	4.89253	3.92986	2.94899	2.06229	1.3727	0.94392	0.797768	0.925369	1.29142	1.85319	2.55167	3.32522	4.12541	4.91568	5.6703	6.37408	7.02085	7.61092	8.14966	8.64525	9.10353	9.53437	9.95043	10.3607	10.7709	11.1832	11.5979	12.0051	12.4126	12.819	13.2177	13.6074	13.9929	14.3788	14.7628	15.1411	15.5127	15.8749	16.2082	16.5311	16.8396	17.1024	17.3186	17.4945	17.6035	17.6189	17.5332	17.3319
2.45914	1.5378	0.663377	-0.0223281	-0.565672	-0.966851	-1.16472	-1.07803	-0.690451	-0.0784808	0.678362	1.52889	2.41169	3.29096	4.13471	4.9184	5.63531	6.28939	6.88608	7.42914	7.9269	8.39369	8.81993	9.20603	9.55145	9.85204	10.1244	10.4047	10.6822	10.9493	11.2147	11.4608	11.6906	11.9003	12.0845	12.2417	12.3751	12.4867	12.5762	12.6544	12.7143	12.7524	12.7836	12.812	12.8366	12.8577	12.86	12.7927	12.6108	12.2487
1.86071	1.46013	1.16717	1.00091	0.993174	1.17011	1.54007	2.08735	2.76778	3.52543	4.30254	5.04975	5.72898	6.32038	6.80872	7.1843	7.45899	7.64341	7.74911	7.78826	7.77216	7.71578	7.63516	7.53821	7.42499	7.30395	7.18547	7.07601	6.98364	6.91928	6.88645	6.87763	6.91154	6.98384	7.08744	7.21835	7.37168	7.5411	7.71966	7.89943	8.0686	8.21693	8.35054	8.47146	8.5379	8.54641	8.53997	8.45109	8.20077	7.7947
2.45872	1.75165	0.919317	0.338388	-0.0031582	-0.272906	-0.348151	-0.152267	0.283401	0.89232	1.59749	2.3461	3.12747	3.90695	4.66627	5.39085	6.07948	6.72374	7.32869	7.88452	8.37657	8.82986	9.22203	9.58546	9.91991	10.213	10.4906	10.7628	11.0114	11.2509	11.4791	11.6961	11.8932	12.0716	12.23	12.3963	12.554	12.6873	12.8051	12.9508	13.0883	13.1888	13.2577	13.3145	13.3288	13.2772	13.1312	12.859	12.4501	11.8807
-0.538889	-1.24187	-1.98873	-2.75429	-3.49634	-4.12259	-4.51971	-4.57505	-4.22959	-3.56618	-2.72651	-1.8097	-0.852051	0.277671	1.28031	2.19377	3.0347	3.78417	4.43441	4.97905	5.42601	5.7924	6.09627	6.35154	6.56623	6.7501	6.91106	7.0549	7.18977	7.323	7.46317	7.53486	7.66123	7.98491	8.22272	8.49657	8.80883	9.16284	9.6035	10.1597	10.6299	11.0024	11.3478	11.7369	12.0331	12.1975	12.194	12.0661	11.5975	10.7409
7.75787	6.56993	5.26211	3.9428	2.72649	1.72806	1.07807	0.844612	1.01113	1.53187	2.34827	3.37246	4.51453	5.6885	6.81632	7.83603	8.70187	9.39461	9.90538	10.2423	10.4251	10.4842	10.4521	10.356	10.2245	10.0813	9.94589	9.82884	9.73635	9.67357	9.64258	9.64098	9.66626	9.72182	9.80563	9.91727	10.054	10.2152	10.4004	10.6058	10.8238	11.0421	11.2537	11.4359	11.5524	11.5526	11.3916	10.9978	10.3749	9.48
2.43544	2.09058	1.70331	1.30699	0.935614	0.620111	0.385459	0.248921	0.219299	0.29732	0.476964	0.746622	1.09115	1.49409	1.93888	2.41095	2.89799	3.39002	3.87969	4.36192	4.83351	5.29258	5.73814	6.16979	6.58748	6.99151	7.38253	7.76185	8.13133	8.49381	8.85312	9.21419	9.58284	9.9656	10.3693	10.8006	11.265	11.766	12.3033	12.8721	13.4615	14.0531	14.6216	15.1346	15.5542	15.8375	15.9417	15.824	15.4468	14.7793
4.04892	3.3183	2.55054	1.8786	1.38366	1.09974	1.06097	1.28959	1.75859	2.43574	3.27522	4.22417	5.22124	6.20533	7.13322	7.97284	8.70227	9.31558	9.81426	10.2112	10.526	10.7774	10.9762	11.1294	11.2453	11.3273	11.3768	11.3922	11.375	11.3289	11.2607	11.1818	11.1068	11.0483	11.0122	11.0053	11.034	11.1067	11.2272	11.3994	11.6268	11.9076	12.1935	12.5142	12.8498	13.1641	13.3791	13.5022	13.4917	13.2836
6.74801	5.28391	3.41108	1.64698	0.221048	-0.370626	-0.299402	0.331718	1.31326	2.37999	3.52949	4.71805	5.94131	7.14286	8.25576	9.24391	10.0652	10.7415	11.3273	11.8294	12.237	12.5017	12.5957	12.5391	12.3758	12.173	11.9232	11.6072	11.2278	10.7901	10.3309	9.87277	9.42643	9.01758	8.64624	8.35235	8.11588	7.91036	7.7249	7.54902	7.38953	7.22231	7.02859	6.83547	6.66098	6.51057	6.44486	6.41211	6.35568	6.21566
6.99719	6.30887	5.57283	4.86245	4.24623	3.78049	3.50488	3.4383	3.57784	3.90391	4.37814	4.95857	5.60548	6.28125	6.95584	7.60648	8.21912	8.78722	9.3102	9.79135	10.2369	10.654	11.0494	11.4284	11.7951	12.1514	12.4973	12.8374	13.1608	13.4684	13.7612	14.0402	14.3075	14.5657	14.8171	15.0635	15.3062	15.5453	15.7802	16.0092	16.2293	16.4347	16.6171	16.7644	16.8598	16.8812	16.8012	16.5863	16.1974	15.5961
5.8322	4.81656	3.35214	1.9841	0.987606	0.153206	-0.418806	-0.606684	-0.399424	0.0998956	0.798402	1.57653	2.36468	3.13228	3.87774	4.61493	5.323	5.99476	6.61043	7.1483	7.61462	8.02702	8.40253	8.73506	9.02264	9.28224	9.50802	9.71662	9.92375	10.127	10.3306	10.5242	10.7204	10.9105	11.0998	11.3001	11.5221	11.7473	11.9676	12.1992	12.4497	12.7274	13.0398	13.3691	13.7298	14.0978	14.4471	14.736	14.948	15.0285
2.4013	1.60417	0.805309	0.0846317	-0.551254	-1.06774	-1.42026	-1.57995	-1.52242	-1.22638	-0.728118	-0.0956642	0.608595	1.33747	2.06018	2.75837	3.42175	4.04346	4.62039	5.14887	5.629	6.06524	6.46111	6.8268	7.17381	7.50597	7.83148	8.15257	8.46694	8.78071	9.09641	9.4144	9.73468	10.0655	10.4019	10.7336	11.0617	11.3894	11.7226	12.0675	12.4266	12.7962	13.1689	13.5398	13.9006	14.2362	14.5357	14.7893	14.9756	15.0683
5.38083	4.52516	3.58037	2.62377	1.73852	1.002	0.473064	0.183096	0.135601	0.312185	0.679655	1.19442	1.80781	2.47167	3.14292	3.78858	4.38717	4.92927	5.41582	5.85443	6.25701	6.63528	6.99857	7.3532	7.70306	8.05053	8.39784	8.74795	9.1047	9.47185	9.85189	10.2452	10.6498	11.062	11.4769	11.8899	12.2965	12.6929	13.0757	13.4412	13.7856	14.1042	14.392	14.6432	14.8503	15.0022	15.0837	15.0717	14.9341	14.628
6.84696	5.97996	4.9572	3.89074	2.89496	2.06877	1.48275	1.17227	1.13979	1.36298	1.80325	2.41157	3.13312	3.91281	4.70242	5.46457	6.17533	6.82266	7.40242	7.9138	8.36078	8.74837	9.08385	9.37806	9.64625	9.90489	10.1686	10.4478	10.7479	11.0707	11.4149	11.7778	12.1572	12.5523	12.9643	13.3944	13.8421	14.3055	14.7808	15.2639	15.7501	16.2346	16.7122	17.1772	17.6225	18.038	18.4082	18.7093	18.9082	18.9603
6.47541	5.47118	4.53417	3.76382	3.18248	2.80629	2.66688	2.78245	3.13786	3.68399	4.35286	5.0838	5.84201	6.60986	7.36714	8.08917	8.75727	9.35923	9.88439	10.3244	10.6778	10.9506	11.1529	11.2938	11.3814	11.4242	11.4327	11.4166	11.3814	11.3296	11.2627	11.1827	11.0927	10.9988	10.9093	10.8326	10.775	10.7406	10.7315	10.7486	10.7925	10.8649	10.9676	11.0983	11.2498	11.4093	11.5585	11.671	11.7105	11.629
2.59587	1.67952	0.689201	-0.250416	-1.01768	-1.51661	-1.69108	-1.52836	-1.05352	-0.319005	0.606071	1.64592	2.72731	3.78577	4.77243	5.65455	6.41548	7.05399	7.57891	8.00521	8.35185	8.63721	8.8778	9.08709	9.27565	9.45079	9.61708	9.77708	9.93221	10.0834	10.2318	10.3789	10.5271	10.6799	10.8413	11.0166	11.2122	11.4353	11.6928	11.9912	12.3354	12.7278	13.1662	13.644	14.1483	14.6589	15.1474	15.5764	15.9008	16.0692
6.72876	6.10225	5.50128	4.99202	4.6254	4.44831	4.49944	4.80262	5.35551	6.11927	7.02748	8.01385	9.01067	9.95526	10.7948	11.4959	12.0412	12.4337	12.7017	12.885	13.0236	13.153	13.2898	13.4352	13.5831	13.7254	13.8549	13.9655	14.0545	14.1222	14.1748	14.2239	14.2822	14.3656	14.4848	14.6503	14.8692	15.1449	15.4795	15.8681	16.2976	16.7493	17.1967	17.612	17.9617	18.2076	18.3065	18.2194	17.8954	17.2802
4.76794	4.28565	3.74921	3.18606	2.64975	2.22135	1.97547	1.94698	2.13001	2.49932	3.02655	3.68201	4.42982	5.22781	6.03324	6.80992	7.53207	8.18482	8.76249	9.2658	9.70075	10.0757	10.3997	10.6816	10.9279	11.1427	11.3282	11.486	11.6182	11.7281	11.8192	11.8953	11.9598	12.0151	12.0632	12.1051	12.1423	12.1771	12.2131	12.2548	12.3076	12.3773	12.4691	12.5868	12.73	12.8954	13.0744	13.2525	13.4069	13.507
4.92699	4.07974	3.25383	2.47913	1.7897	1.24611	0.926154	0.88228	1.11849	1.60559	2.28963	3.10753	3.98617	4.85996	5.69267	6.45657	7.12842	7.69152	8.14004	8.47025	8.69183	8.82712	8.90112	8.93591	8.9493	8.95692	8.96951	8.99233	9.029	9.08308	9.15418	9.24034	9.33786	9.44626	9.56744	9.69772	9.83216	9.96406	10.0878	10.198	10.2901	10.357	10.3897	10.3749	10.2975	10.1376	9.87081	9.46821	8.89833	8.11562
4.25038	3.7227	3.17698	2.66043	2.22182	1.92619	1.83367	1.93968	2.22465	2.67145	3.25024	3.9145	4.62313	5.34501	6.05162	6.72272	7.34555	7.9151	8.4289	8.88797	9.29527	9.65461	9.97042	10.2445	10.4806	10.6803	10.8469	10.9829	11.0918	11.181	11.257	11.3273	11.4017	11.4885	11.5953	11.7312	11.9008	12.1064	12.3463	12.6178	12.9135	13.2185	13.5144	13.7818	13.9917	14.1002	14.0761	13.8752	13.4645	12.7958
-9.12677	-9.686	-10.2667	-10.8332	-11.35	-11.7853	-12.1146	-12.3237	-12.4085	-12.3719	-12.2231	-11.9796	-11.6651	-11.3043	-10.9194	-10.5292	-10.1489	-9.78947	-9.45735	-9.1557	-8.88427	-8.64	-8.41777	-8.21125	-8.01491	-7.81791	-7.61599	-7.40338	-7.17511	-6.92719	-6.6567	-6.3618	-6.04124	-5.69461	-5.32235	-4.92846	-4.50941	-4.06578	-3.60709	-3.13772	-2.66482	-2.1934	-1.73354	-1.29905	-0.907715	-0.58296	-0.353374	-0.254489	-0.327824	-0.618105
4.39649	3.96185	3.61621	3.39849	3.365	3.57534	4.05226	4.77234	5.68541	6.73329	7.85327	8.97911	10.0521	11.0342	11.9104	12.6783	13.3393	13.8972	14.3572	14.7245	15.0087	15.2209	15.3745	15.4838	15.5624	15.6208	15.666	15.7022	15.7319	15.7566	15.777	15.7941	15.8096	15.8248	15.8408	15.8599	15.8852	15.92	15.967	16.028	16.1043	16.1963	16.3021	16.4168	16.5305	16.6263	16.6793	16.6528	16.4986	16.1552
2.55203	1.97489	1.31102	0.624234	-0.0153645	-0.540213	-0.89365	-1.03685	-0.952834	-0.646195	-0.140094	0.527867	1.31241	2.16512	3.0386	3.89204	4.69326	5.42025	6.06124	6.61295	7.07908	7.46733	7.78639	8.04556	8.25374	8.41926	8.5497	8.65172	8.73161	8.7952	8.8478	8.89417	8.93841	8.98411	9.03447	9.09227	9.15992	9.239	9.33035	9.43379	9.54808	9.67094	9.79854	9.92496	10.0406	10.1298	10.1693	10.1256	9.95227	9.59344
3.53491	2.68652	1.85098	1.106	0.515365	0.124268	-0.0419708	0.0223377	0.304807	0.778197	1.40501	2.14143	2.94332	3.77063	4.58986	5.37613	6.11324	6.79291	7.41302	7.97608	8.48792	8.95655	9.39052	9.79826	10.1879	10.5662	10.9388	11.3094	11.6805	12.0527	12.4257	12.7984	13.1695	13.5381	13.9039	14.2674	14.6296	14.9919	15.3552	15.7185	16.0783	16.4271	16.7523	17.0353	17.2511	17.3676	17.3477	17.1489	16.7265	16.0358
5.04779	4.36596	3.69515	3.11017	2.67736	2.44821	2.45492	2.7087	3.19743	3.8853	4.72108	5.64701	6.60383	7.53744	8.40492	9.17495	9.8268	10.3543	10.7606	11.0553	11.2523	11.3692	11.4228	11.43	11.4043	11.3569	11.2966	11.2292	11.1591	11.089	11.0201	10.953	10.8878	10.8256	10.7665	10.7124	10.6661	10.6314	10.6117	10.6114	10.6319	10.6718	10.7258	10.7822	10.8234	10.8206	10.7368	10.5306	10.1519	9.5525
3.91107	3.18491	2.31416	1.37175	0.474925	-0.225135	-0.612104	-0.655961	-0.389423	0.139101	0.880987	1.77995	2.76977	3.78266	4.76036	5.66083	6.45999	7.15064	7.73809	8.23515	8.65771	9.0209	9.33753	9.61848	9.87392	10.1132	10.345	10.5766	10.8138	11.059	11.3101	11.5633	11.8164	12.0664	12.3089	12.5435	12.7756	13.0098	13.2461	13.4826	13.7176	13.9488	14.1698	14.3699	14.5324	14.6327	14.6391	14.5103	14.1983	13.6464
0.865613	-0.22073	-1.10757	-1.69943	-1.93405	-1.78633	-1.28096	-0.513966	0.423662	1.44677	2.47543	3.44309	4.29876	5.0239	5.62106	6.10758	6.5178	6.88886	7.25124	7.62003	7.99968	8.38429	8.76072	9.11507	9.43742	9.72262	9.97288	10.1982	10.4144	10.6428	10.9042	11.2141	11.5838	12.0208	12.5199	13.0734	13.6674	14.288	14.9178	15.5388	16.1358	16.6944	17.201	17.6441	18.0019	18.2522	18.3612	18.2801	17.9755	17.3788
6.47117	5.66847	4.82546	4.00027	3.24466	2.60019	2.0968	1.75282	1.57535	1.56081	1.6961	1.96043	2.3278	2.76981	3.25831	3.76764	4.27618	4.76718	5.22886	5.65417	6.04014	6.38711	6.69793	6.97712	7.23027	7.46329	7.68212	7.89248	8.09974	8.30897	8.52491	8.75206	8.99465	9.25673	9.54223	9.85497	10.1985	10.5761	10.9901	11.4416	11.9292	12.4479	12.9874	13.5305	14.0513	14.514	14.8734	15.0757	15.0616	14.7704
3.82618	2.98263	2.11632	1.28117	0.52398	-0.1178	-0.616435	-0.953854	-1.12013	-1.1166	-0.957489	-0.664152	-0.262425	0.220843	0.758875	1.32747	1.90511	2.47437	3.02091	3.53504	4.01046	4.44508	4.8389	5.19457	5.51668	5.81068	6.08325	6.34047	6.5884	6.83276	7.07911	7.33282	7.59918	7.88331	8.18992	8.52353	8.88808	9.28572	9.71806	10.1855	10.6858	11.2154	11.7667	12.3278	12.882	13.4069	13.873	14.2436	14.4711	14.5039
1.39606	0.37806	-0.66145	-1.63861	-2.47427	-3.10455	-3.4852	-3.59248	-3.44439	-3.07384	-2.5272	-1.856	-1.10879	-0.332231	0.437773	1.17671	1.87047	2.51224	3.10221	3.6469	4.15443	4.63293	5.08892	5.52769	5.95254	6.36518	6.76631	7.15591	7.53422	7.90212	8.2615	8.61525	8.96727	9.32254	9.68675	10.0664	10.4677	10.8963	11.3573	11.8545	12.3891	12.9602	13.5626	14.187	14.8192	15.4392	16.0207	16.532	16.9346	17.1775
4.03386	3.31474	2.5111	1.68224	0.898537	0.245315	-0.195292	-0.375449	-0.319072	-0.0693772	0.339038	0.879885	1.52492	2.2373	2.98291	3.73105	4.45663	5.13585	5.75587	6.31054	6.79735	7.21749	7.57376	7.87431	8.12915	8.35135	8.5543	8.75124	8.95364	9.16756	9.39576	9.63975	9.89956	10.1761	10.4707	10.7862	11.122	11.4768	11.8488	12.2298	12.6099	12.9754	13.3108	13.5954	13.8019	13.9018	13.8596	13.6345	13.1902	12.4773
2.26104	1.94127	1.42387	0.978129	0.720924	0.583281	0.479334	0.453206	0.613878	1.00065	1.54773	2.20513	2.94311	3.73887	4.52501	5.25708	5.92894	6.52585	7.05097	7.50102	7.89081	8.22865	8.5202	8.7766	8.99395	9.1792	9.33399	9.47398	9.58869	9.67681	9.76161	9.83084	9.90064	9.96944	10.0404	10.116	10.2065	10.3075	10.4177	10.5484	10.6965	10.8651	11.0493	11.2336	11.4021	11.533	11.5927	11.555	11.382	11.0151
1.90432	0.90467	-0.313443	-1.64929	-2.98378	-4.18387	-5.1331	-5.76642	-6.08084	-6.11933	-5.9455	-5.62544	-5.21248	-4.74881	-4.26348	-3.77356	-3.28625	-2.80252	-2.31832	-1.82718	-1.32231	-0.796769	-0.245839	0.329332	0.92556	1.53627	2.15423	2.77248	3.38558	3.99021	4.58466	5.16912	5.74479	6.31227	6.87175	7.42368	7.96793	8.50233	9.02377	9.52622	10.0004	10.4357	10.8217	11.147	11.3983	11.5569	11.5962	11.4859	11.1826	10.6381
3.79278	2.98052	2.10037	1.22512	0.430017	-0.205153	-0.6049	-0.717772	-0.534315	-0.0890017	0.557136	1.33497	2.18599	3.06675	3.941	4.77584	5.54265	6.22116	6.80185	7.286	7.68166	8.00613	8.27434	8.50125	8.69746	8.8715	9.02965	9.17671	9.31806	9.45924	9.60768	9.77279	9.9655	10.1961	10.472	10.7975	11.1732	11.5951	12.057	12.5503	13.0619	13.5775	14.0806	14.5499	14.9604	15.2795	15.4654	15.4639	15.2068	14.631
1.80274	0.536275	-0.700395	-1.82556	-2.76338	-3.44118	-3.77959	-3.75583	-3.39769	-2.73504	-1.81777	-0.704335	0.525096	1.78823	3.02512	4.18468	5.22608	6.12425	6.86942	7.47248	7.95048	8.32759	8.63259	8.89339	9.13728	9.38931	9.6662	9.98037	10.3398	10.7487	11.2087	11.7176	12.2719	12.8693	13.5052	14.177	14.8789	15.6053	16.348	17.0957	17.8335	18.5417	19.1963	19.7664	20.2197	20.5197	20.6302	20.5082	20.1313	19.4582
7.14579	6.3501	5.56082	4.83898	4.23937	3.80539	3.56525	3.52986	3.69295	4.0335	4.51961	5.11277	5.77184	6.45709	7.13311	7.7711	8.35017	8.85813	9.29028	9.64702	9.93468	10.1616	10.3373	10.4711	10.5723	10.6488	10.7069	10.7519	10.7878	10.8181	10.8459	10.8739	10.9051	10.9425	10.989	11.0479	11.1223	11.2153	11.329	11.4642	11.6197	11.7914	11.9709	12.1445	12.2922	12.3862	12.391	12.2619	11.9507	11.4059
6.79429	6.09982	5.38999	4.71023	4.10194	3.60164	3.24119	3.04913	3.03283	3.18	3.47291	3.88796	4.39934	4.97902	5.59576	6.22131	6.83507	7.4214	7.96967	8.47211	8.92627	9.33379	9.69791	10.0238	10.317	10.5821	10.8248	11.0487	11.2576	11.4543	11.6414	11.8218	11.9985	12.1748	12.355	12.5442	12.7468	12.9663	13.2053	13.4646	13.7417	14.0293	14.3123	14.5716	14.7806	14.9019	14.8934	14.711	14.3049	13.6091
5.0765	4.10539	3.05174	1.95945	0.93781	0.0839433	-0.545959	-0.886305	-0.906063	-0.650133	-0.155916	0.532255	1.34367	2.22382	3.12036	3.9857	4.79472	5.51984	6.15172	6.6966	7.15655	7.54583	7.88088	8.17399	8.44025	8.69136	8.93347	9.17387	9.4155	9.66049	9.91085	10.1644	10.4215	10.6832	10.9455	11.2067	11.4672	11.7223	11.9686	12.2035	12.4238	12.6271	12.8041	12.9517	13.06	13.1113	13.0907	12.9718	12.7171	12.3097
[truncated: 50 more columns]

## Sheet: 2
-3.50847	-3.85906	-4.04251	-4.0562	-3.88315	-3.55143	-3.08343	-2.509	-1.84147	-1.09088	-0.258644	0.603494	1.46303	2.28439	3.04104	3.71565	4.30043	4.79317	5.22073	5.60097	5.9513	6.29253	6.62961	6.96961	7.30412	7.63506	7.9626	8.28378	8.59992	8.91149	9.21759	9.51767	9.81691	10.1193	10.428	10.7406	11.0636	11.3871	11.7055	12.0096	12.2853	12.5143	12.6785	12.7534	12.7156	12.5399	12.2037	11.6766	10.9238	9.89799
-3.18789	-3.07679	-2.95234	-2.81727	-2.63187	-2.3682	-2.01648	-1.53301	-0.920062	-0.160795	0.735675	1.74444	2.82682	3.93287	5.00522	5.98343	6.81253	7.45285	7.88502	8.1131	8.15317	8.03781	7.78045	7.4249	6.99356	6.50817	5.98831	5.45083	4.91227	4.38958	3.89707	3.44528	3.04144	2.69082	2.37497	2.11005	1.88214	1.68335	1.50726	1.34531	1.19658	1.06565	0.956192	0.873187	0.816989	0.78865	0.783386	0.792553	0.803089	0.7951
-4.96477	-5.23822	-5.23902	-4.96797	-4.44356	-3.69745	-2.77378	-1.73149	-0.642508	0.446932	1.52342	2.51977	3.40495	4.17708	4.83794	5.40175	5.88905	6.32501	6.73047	7.12024	7.50595	7.88846	8.27761	8.66748	9.04305	9.40117	9.73224	10.0299	10.2948	10.5067	10.6857	10.8109	10.8872	10.92	10.9122	10.8692	10.8045	10.7243	10.6306	10.523	10.3938	10.2325	10.0261	9.75457	9.39318	8.914	8.28586	7.4676	6.4179	5.12058
1.97285	0.519419	-0.769099	-1.67632	-2.07857	-2.01772	-1.63259	-1.08169	-0.502762	0.00538539	0.428063	0.816706	1.21704	1.66257	2.15802	2.68227	3.18403	3.62304	3.97786	4.24907	4.44919	4.60563	4.74223	4.87723	5.02135	5.18561	5.37747	5.59999	5.84973	6.12706	6.42691	6.74301	7.07218	7.41155	7.75618	8.10705	8.45841	8.80321	9.13107	9.42987	9.68441	9.88421	10.0064	10.0358	9.95988	9.77354	9.47767	9.07567	8.56033	7.90776
2.52235	2.64125	2.90952	3.34023	3.93504	4.70552	5.60761	6.60632	7.67421	8.76782	9.83126	10.823	11.7049	12.4543	13.0509	13.495	13.7932	13.973	14.0458	14.0322	13.9489	13.8112	13.6308	13.4138	13.1674	12.9022	12.6221	12.3352	12.0443	11.7539	11.4654	11.1756	10.8827	10.5859	10.2798	9.96484	9.64249	9.31297	8.97621	8.63404	8.28231	7.92188	7.52273	7.07676	6.56465	5.94607	5.17928	4.23579	3.05177	1.60067
3.17177	2.23575	1.34972	0.611233	0.160333	-0.072559	-0.201844	-0.0355888	0.381976	1.02233	1.81772	2.76988	3.8326	4.99911	6.12555	7.1898	8.14924	9.0147	9.69501	10.2888	10.7982	11.2344	11.6287	12.0694	12.5005	12.9395	13.4295	13.9153	14.3823	14.8492	15.2801	15.7039	16.1267	16.5068	16.8791	17.2404	17.5656	17.8717	18.1845	18.4751	18.7308	18.9725	19.1915	19.3407	19.4181	19.4061	19.2981	19.0859	18.7384	18.2422
-0.991633	-1.35732	-1.51453	-1.45972	-1.20022	-0.746256	-0.134861	0.563241	1.30587	2.06061	2.79407	3.46655	4.08317	4.63267	5.08925	5.46195	5.75377	5.97401	6.13935	6.2628	6.35183	6.42539	6.49781	6.5774	6.67239	6.79398	6.93788	7.10614	7.2964	7.50515	7.72581	7.94901	8.16623	8.36754	8.54005	8.67561	8.76387	8.79853	8.77062	8.67214	8.49351	8.22286	7.84317	7.34275	6.67572	5.81029	4.73752	3.44564	1.91716	0.192041
-2.40395	-3.11895	-3.53184	-3.63748	-3.47132	-3.07731	-2.49072	-1.73991	-0.856871	0.127029	1.14152	2.12885	3.03283	3.81774	4.46741	4.98496	5.39044	5.71277	5.98313	6.22761	6.46469	6.70159	6.93907	7.17672	7.41574	7.65785	7.90459	8.15929	8.42398	8.6972	8.97476	9.24899	9.51285	9.75975	9.98068	10.1704	10.3268	10.4484	10.5476	10.6237	10.6735	10.6912	10.6658	10.5832	10.4268	10.1732	9.79749	9.25148	8.49694	7.47439
-2.64697	-3.14481	-3.33424	-3.22139	-2.83418	-2.22711	-1.45903	-0.586421	0.339114	1.27127	2.16839	2.9935	3.71765	4.32322	4.80708	5.17492	5.44776	5.64259	5.77467	5.86334	5.92115	5.95683	5.97837	5.99303	6.00855	6.03168	6.06797	6.11969	6.18696	6.2707	6.36773	6.47924	6.60601	6.75018	6.91565	7.10501	7.31576	7.54265	7.77637	8.00697	8.22587	8.42559	8.60004	8.74238	8.8433	8.88903	8.86354	8.7489	8.52508	8.16405
-1.01101	-1.17151	-1.15533	-0.913692	-0.445615	0.218398	1.03741	1.96943	2.97169	4.01305	5.05992	6.06261	6.9845	7.78548	8.45054	8.95803	9.32198	9.56363	9.71102	9.78848	9.80957	9.78455	9.71784	9.6155	9.48436	9.33222	9.1674	8.99922	8.83846	8.69479	8.57636	8.48157	8.40948	8.35962	8.33412	8.33798	8.37736	8.45824	8.58552	8.76225	8.98804	9.25607	9.55117	9.85165	10.1281	10.3425	10.4478	10.3907	10.1178	9.58295
-0.187822	-1.51688	-2.76354	-3.90552	-4.82781	-5.52401	-5.92419	-6.02364	-5.83541	-5.39532	-4.7532	-3.9673	-3.09367	-2.18181	-1.27088	-0.389227	0.445372	1.2237	1.94382	2.60566	3.22397	3.81565	4.38719	4.9589	5.54274	6.14508	6.76388	7.38836	8.00384	8.59569	9.15231	9.66634	10.1357	10.5638	10.9553	11.3143	11.64	11.9265	12.1641	12.3397	12.4417	12.4532	12.3588	12.1458	11.8048	11.3273	10.7021	9.9191	8.97246	7.82801
3.97525	3.83668	3.8481	4.00744	4.35884	4.86656	5.47785	6.1919	6.99678	7.84176	8.70358	9.54444	10.3286	11.0367	11.6378	12.1159	12.4849	12.7457	12.9094	12.9963	13.0196	12.9925	12.9261	12.8335	12.726	12.6157	12.5142	12.4276	12.3613	12.3187	12.2972	12.2948	12.3067	12.3257	12.3457	12.3627	12.3716	12.3699	12.3528	12.314	12.2456	12.1386	11.9726	11.7317	11.3939	10.9365	10.3509	9.61209	8.73072	7.69056
-3.20933	-2.96433	-2.25199	-1.16613	0.191526	1.71961	3.31373	4.87944	6.34402	7.64152	8.77103	9.68237	10.3664	10.8539	11.1515	11.2915	11.31	11.2411	11.1152	10.9548	10.7771	10.5932	10.4103	10.2345	10.0688	9.91994	9.79501	9.68837	9.61045	9.55954	9.534	9.52759	9.53074	9.53521	9.53532	9.53103	9.52365	9.51589	9.516	9.53155	9.57045	9.63819	9.73642	9.86227	10.005	10.1465	10.2603	10.3175	10.2835	10.1325
-2.7274	-2.65195	-2.42913	-2.07111	-1.5887	-0.987712	-0.298198	0.459921	1.27717	2.14296	3.03151	3.92823	4.80824	5.63063	6.3739	7.0345	7.59955	8.06928	8.46545	8.79609	9.07981	9.33542	9.57326	9.79974	10.0187	10.2285	10.4261	10.6074	10.7701	10.9103	11.0228	11.1034	11.1496	11.1601	11.1308	11.0651	10.9648	10.834	10.6752	10.4881	10.2693	10.0159	9.71522	9.35801	8.93071	8.40379	7.74054	6.90022	5.82807	4.48577
-3.35521	-4.56072	-5.44179	-5.92595	-5.99395	-5.67314	-5.02267	-4.11862	-3.04136	-1.86973	-0.673263	0.490382	1.57676	2.55254	3.4118	4.1675	4.82134	5.40397	5.94104	6.45642	6.96958	7.49369	8.03538	8.5943	9.16456	9.74045	10.3167	10.8898	11.4583	12.0211	12.5765	13.1206	13.6464	14.1627	14.6446	15.0935	15.5074	15.8869	16.2318	16.5355	16.7835	16.9533	17.0165	16.94	16.69	16.2285	15.5125	14.4941	13.1221	11.3388
6.60098	5.60462	4.65366	3.80956	3.12296	2.63081	2.3542	2.29813	2.45163	2.78693	3.27155	3.86972	4.52741	5.19814	5.85763	6.47829	7.04393	7.55696	8.02553	8.4615	8.8767	9.27918	9.66982	10.0471	10.4088	10.7649	11.105	11.4253	11.7246	12.0043	12.2668	12.5172	12.7611	12.9965	13.2258	13.4485	13.664	13.871	14.0643	14.2348	14.3705	14.457	14.4788	14.4176	14.2546	13.968	13.5304	12.9055	12.0496	10.9157
0.293177	-0.28861	-0.784244	-1.158	-1.37084	-1.41558	-1.29334	-1.01038	-0.578986	-0.0192126	0.639692	1.36076	2.10248	2.82457	3.49624	4.10106	4.63904	5.11885	5.55097	5.95587	6.33244	6.68999	7.03227	7.36093	7.6779	7.98375	8.27659	8.55567	8.82476	9.08039	9.32049	9.54537	9.75648	9.95669	10.1489	10.3359	10.5194	10.6987	10.8731	11.0409	11.192	11.3207	11.4193	11.4782	11.4877	11.4375	11.3134	11.0915	10.734	10.1872
1.00954	0.340203	-0.133655	-0.333182	-0.230348	0.155543	0.76931	1.54826	2.42747	3.32873	4.20459	5.01888	5.74984	6.40822	6.99679	7.51973	7.97772	8.36628	8.67079	8.88501	9.01721	9.08874	9.13024	9.1707	9.233	9.3302	9.46328	9.63587	9.83621	10.0612	10.3042	10.5646	10.8334	11.1045	11.3693	11.6197	11.8655	12.0993	12.3309	12.5547	12.7687	12.9648	13.1337	13.2656	13.3511	13.3819	13.3492	13.2425	13.0415	12.7268
0.784514	0.599053	0.549182	0.655974	0.927962	1.35546	1.91349	2.57047	3.29422	4.05314	4.81408	5.54289	6.2072	6.78356	7.26102	7.63788	7.9236	8.14901	8.30848	8.42198	8.49663	8.5362	8.54293	8.51573	8.4555	8.36246	8.24075	8.09824	7.9437	7.78539	7.63553	7.49284	7.35973	7.24834	7.16418	7.11829	7.12394	7.19389	7.33822	7.56097	7.86157	8.23209	8.65522	9.10413	9.54212	9.92083	10.1803	10.2509	10.0563	9.51974
2.1725	1.37576	0.800976	0.481763	0.429954	0.623568	1.02435	1.59704	2.3033	3.09095	3.92246	4.75347	5.56871	6.3462	7.06917	7.75434	8.3959	8.99146	9.5439	10.0546	10.5258	10.9588	11.3672	11.742	12.0919	12.4299	12.7496	13.0566	13.3601	13.6609	13.963	14.27	14.5765	14.8825	15.1854	15.483	15.7721	16.0464	16.3015	16.5235	16.6926	16.7891	16.7884	16.6684	16.4096	15.9911	15.3917	14.5797	13.5246	12.2066
4.05656	3.41423	2.99228	2.83253	2.95088	3.34122	3.98137	4.83809	5.85526	6.96321	8.10295	9.22381	10.2799	11.2389	12.1016	12.8392	13.47	14.0092	14.4724	14.8749	15.2307	15.5469	15.8256	16.0678	16.2727	16.4423	16.5771	16.6795	16.7511	16.7938	16.8103	16.8034	16.7742	16.7259	16.6602	16.5758	16.4717	16.349	16.2075	16.0473	15.8588	15.6383	15.3805	15.0714	14.6904	14.2104	13.5946	12.7861	11.7338	10.3917
-3.7104	-3.40617	-2.85798	-2.1273	-1.27386	-0.348629	0.583567	1.4748	2.27923	2.96086	3.49499	3.87534	4.11561	4.24838	4.3088	4.32393	4.30951	4.26668	4.19059	4.08145	3.94562	3.79237	3.63105	3.46965	3.31693	3.18324	3.07557	2.99458	2.93819	2.90169	2.87919	2.86683	2.86243	2.86317	2.86618	2.86874	2.87045	2.87338	2.88132	2.89668	2.91621	2.92767	2.9106	2.84119	2.69616	2.45247	2.08498	1.5629	0.847884	-0.0997093
-6.21153	-5.83953	-5.2785	-4.56559	-3.73332	-2.81048	-1.82496	-0.805228	0.217244	1.20745	2.13002	2.95694	3.67244	4.27858	4.78619	5.21813	5.59671	5.93268	6.22075	6.44994	6.61579	6.7221	6.77765	6.79302	6.78325	6.7558	6.71299	6.66016	6.60746	6.56138	6.53312	6.5277	6.5498	6.60323	6.68725	6.79097	6.90342	7.01441	7.11466	7.19756	7.25815	7.29252	7.29247	7.23665	7.08928	6.7918	6.27681	5.48416	4.33608	2.81151
-2.08476	-2.75026	-3.18779	-3.37466	-3.30277	-2.9819	-2.43878	-1.71874	-0.883412	0.0154364	0.933806	1.83036	2.6607	3.40064	4.03359	4.55044	4.96364	5.29113	5.55496	5.77744	5.97634	6.16519	6.3526	6.54278	6.73978	6.94561	7.1606	7.38714	7.6267	7.87962	8.1444	8.41722	8.69417	8.97244	9.25023	9.52543	9.79409	10.0505	10.2841	10.4791	10.6162	10.6748	10.633	10.4678	10.15	9.64116	8.91359	7.92228	6.62877	5.03363
-0.63802	-0.324277	0.290312	1.12985	2.1339	3.25653	4.45308	5.66047	6.83753	7.93979	8.95924	9.86497	10.6172	11.2021	11.6068	11.8337	11.9091	11.839	11.6483	11.3611	11.0004	10.5927	10.1441	9.67456	9.19609	8.71825	8.25255	7.81581	7.41565	7.06002	6.74478	6.46524	6.21727	5.99124	5.7831	5.58141	5.39199	5.20661	5.02138	4.81686	4.58878	4.32227	3.99705	3.59338	3.08342	2.42371	1.59422	0.541052	-0.778137	-2.39231
2.38774	1.34826	0.335295	-0.599756	-1.35361	-1.8776	-2.14222	-2.14817	-1.91477	-1.47023	-0.848702	-0.0917291	0.752231	1.63093	2.49536	3.3062	4.03924	4.68523	5.24719	5.73792	6.17614	6.58254	6.97449	7.36277	7.75238	8.14488	8.53709	8.92363	9.29939	9.66689	10.0295	10.3854	10.7381	11.0877	11.431	11.7622	12.0748	12.3637	12.6234	12.8487	13.0367	13.1846	13.2882	13.3386	13.3189	13.2041	12.9644	12.5658	11.9717	11.146
1.92177	1.61573	1.47897	1.54641	1.83065	2.32303	2.99532	3.80217	4.67774	5.55579	6.38924	7.14932	7.82187	8.40226	8.90173	9.33639	9.70367	10.0163	10.276	10.4822	10.6386	10.7529	10.8336	10.8914	10.9349	10.9724	11.0085	11.0432	11.0736	11.0958	11.1101	11.1194	11.1287	11.1443	11.172	11.2162	11.2807	11.3687	11.4797	11.6059	11.7306	11.8331	11.8881	11.8647	11.7252	11.429	10.9313	10.1707	9.10805	7.7095
-3.00311	-3.07223	-2.76156	-2.10609	-1.16189	-0.00321541	1.2914	2.65993	3.99293	5.22766	6.30899	7.20828	7.91826	8.44924	8.81994	9.04373	9.15523	9.15771	9.0611	8.87589	8.61054	8.27156	7.87375	7.43419	6.96742	6.48857	6.02333	5.58016	5.16811	4.79251	4.45417	4.14926	3.86983	3.60764	3.35395	3.09821	2.83068	2.54267	2.22705	1.87774	1.49037	1.06033	0.583035	0.0450925	-0.566911	-1.26181	-2.06628	-3.00749	-4.11448	-5.41232
2.82887	1.74473	0.839715	0.162411	-0.246222	-0.363947	-0.194846	0.233134	0.87323	1.67849	2.5662	3.48281	4.37467	5.19107	5.91315	6.54769	7.11414	7.63827	8.14095	8.63223	9.11273	9.57752	10.02	10.4356	10.826	11.2002	11.5701	11.9434	12.3193	12.6916	13.0514	13.3893	13.697	13.9689	14.2016	14.3966	14.5564	14.6821	14.7709	14.8158	14.8041	14.7184	14.5394	14.2448	13.8147	13.2289	12.4617	11.4791	10.2392	8.70006
-1.26032	-2.20128	-2.9652	-3.48291	-3.71892	-3.65172	-3.31182	-2.75082	-2.02818	-1.20114	-0.318111	0.586521	1.46705	2.29255	3.04561	3.71705	4.30754	4.8239	5.27724	5.67906	6.03927	6.36638	6.66742	6.94865	7.22161	7.48751	7.74869	8.005	8.25409	8.49311	8.71525	8.91517	9.08757	9.22902	9.3398	9.42734	9.49547	9.54787	9.5872	9.61616	9.63352	9.62908	9.59145	9.50633	9.34893	9.09522	8.71478	8.16371	7.41165	6.4272
1.53988	0.621902	-0.152922	-0.67582	-0.875179	-0.744568	-0.326744	0.314479	1.1086	1.98433	2.88587	3.77071	4.60692	5.3865	6.09375	6.7271	7.30239	7.8229	8.2962	8.73036	9.13145	9.50305	9.84681	10.1642	10.4562	10.7241	10.9714	11.2047	11.4339	11.6678	11.9069	12.1561	12.4076	12.6555	12.8938	13.1187	13.3289	13.5224	13.6963	13.8479	13.9757	14.0769	14.1438	14.1634	14.1184	13.9909	13.7604	13.4047	12.9018	12.2216
2.1738	0.975668	-0.0981596	-0.945598	-1.50749	-1.78645	-1.7771	-1.48802	-0.945254	-0.207112	0.670792	1.60647	2.52882	3.37858	4.11746	4.73365	5.2432	5.67813	6.07415	6.46431	6.86664	7.29223	7.73779	8.195	8.65521	9.11806	9.58406	10.0505	10.5199	10.9905	11.4576	11.9124	12.3547	12.7707	13.1584	13.5152	13.8394	14.13	14.385	14.6049	14.78	14.8991	14.9488	14.8986	14.7205	14.3813	13.8401	13.0475	11.9523	10.5091
4.3959	3.39919	2.51959	1.86384	1.48954	1.41851	1.63892	2.11375	2.79158	3.61478	4.52439	5.46302	6.3771	7.22023	7.961	8.58421	9.0975	9.51895	9.8738	10.1877	10.4825	10.7745	11.0731	11.381	11.6969	12.0195	12.347	12.6786	13.0195	13.3675	13.7216	14.0839	14.4525	14.8213	15.1809	15.5222	15.8382	16.1249	16.3825	16.6179	16.8393	17.0514	17.2506	17.4228	17.547	17.5938	17.5279	17.3068	16.8817	16.1955
-0.347446	-1.44325	-2.20676	-2.56659	-2.53603	-2.15072	-1.48309	-0.623953	0.382989	1.45899	2.56347	3.65958	4.70625	5.68499	6.56312	7.31709	7.94059	8.43185	8.79604	9.04184	9.1858	9.24137	9.22845	9.16522	9.06865	8.95487	8.8367	8.72214	8.6147	8.51515	8.42302	8.33769	8.25983	8.19154	8.13572	8.09565	8.07447	8.07367	8.0919	8.12504	8.16684	8.20874	8.23972	8.24676	8.21415	8.12096	7.93857	7.63001	7.14835	6.43722
-1.8386	-2.59381	-3.12678	-3.37679	-3.29697	-2.89355	-2.20025	-1.27889	-0.210534	0.918532	2.03161	3.07109	4.00189	4.80947	5.49257	6.05329	6.49637	6.82555	7.04878	7.19085	7.28763	7.36887	7.45099	7.5382	7.62805	7.71627	7.80261	7.89025	7.98509	8.09007	8.20638	8.33307	8.46779	8.60794	8.75318	8.90668	9.0741	9.26086	9.46848	9.6915	9.91898	10.1374	10.3341	10.4905	10.5899	10.613	10.5378	10.3373	9.97687	9.41707
-1.45471	-1.74398	-1.86882	-1.80785	-1.56139	-1.14782	-0.597932	0.0524348	0.766151	1.50974	2.25853	2.99076	3.6723	4.30688	4.87238	5.30958	5.6318	5.83636	5.93396	5.95211	5.92081	5.86723	5.81691	5.78849	5.79235	5.82977	5.89835	5.99373	6.1104	6.24487	6.40396	6.58083	6.7724	6.97382	7.17988	7.38471	7.58636	7.77724	7.94537	8.07897	8.16324	8.18169	8.11623	7.94536	7.64609	7.19838	6.57851	5.71898	4.62171	3.22645
0.859777	0.695754	0.686762	0.893937	1.33564	1.99098	2.81887	3.77559	4.81825	5.90172	6.97935	8.00582	8.93972	9.74416	10.3902	10.8601	11.1512	11.2774	11.2681	11.1616	10.9954	10.7991	10.5907	10.3834	10.1851	9.99864	9.82307	9.65454	9.48935	9.3252	9.16031	8.99281	8.8231	8.65597	8.49916	8.36016	8.24624	8.16484	8.12288	8.1256	8.17742	8.28175	8.44056	8.65152	8.90176	9.16327	9.39053	9.52223	9.48775	9.21421
-3.66353	-3.83571	-3.77967	-3.50637	-3.02965	-2.3547	-1.54494	-0.64835	0.310373	1.30197	2.28736	3.2301	4.09495	4.84349	5.45075	5.90935	6.22739	6.42112	6.51666	6.54245	6.52459	6.48281	6.43156	6.37923	6.33104	6.29046	6.25952	6.23958	6.23166	6.23452	6.24478	6.25635	6.26135	6.25151	6.21689	6.15178	6.04941	5.90437	5.71115	5.46404	5.1554	4.77657	4.316	3.76453	3.10424	2.31903	1.37448	0.253842	-1.07391	-2.60831
-2.2193	-2.5462	-2.74329	-2.77727	-2.62412	-2.26385	-1.68064	-0.902847	0.0222615	1.04633	2.11863	3.18407	4.18677	5.08411	5.85022	6.47748	6.97335	7.37676	7.69388	7.95685	8.18556	8.39062	8.57633	8.74392	8.89398	9.02998	9.15818	9.2871	9.42397	9.57465	9.73971	9.9162	10.0994	10.2825	10.4598	10.6271	10.7806	10.9161	11.0257	11.0996	11.1257	11.0865	10.9596	10.7189	10.3365	9.77371	8.99891	7.96625	6.63948	5.02988
0.612345	-0.0234285	-0.462523	-0.68134	-0.68831	-0.503638	-0.152909	0.335674	0.932672	1.60651	2.32046	3.06386	3.78147	4.46244	5.08881	5.64557	6.13615	6.56934	6.96018	7.32746	7.69109	8.06529	8.47383	8.91151	9.37797	9.85865	10.3601	10.8506	11.326	11.7792	12.2054	12.6006	12.9619	13.2865	13.571	13.8162	14.0263	14.2053	14.3576	14.4862	14.5852	14.6493	14.6687	14.6272	14.5116	14.3011	13.9693	13.4809	12.7918	11.851
0.772516	0.631476	0.676726	0.959491	1.4875	2.23475	3.15619	4.1985	5.30756	6.42467	7.52883	8.56695	9.50578	10.3281	11.0251	11.5994	12.0636	12.4315	12.7303	12.965	13.143	13.2713	13.3503	13.3854	13.3816	13.3429	13.2752	13.1824	13.068	12.9368	12.7958	12.6523	12.5111	12.376	12.2433	12.1143	11.989	11.8699	11.7588	11.6555	11.5556	11.4506	11.3272	11.1626	10.9438	10.6483	10.2486	9.70676	8.98177	8.0392
-2.46432	-3.14374	-3.58821	-3.74151	-3.59517	-3.185	-2.55666	-1.77134	-0.874729	0.0826967	1.045	1.95393	2.77616	3.49668	4.11076	4.63709	5.08977	5.47874	5.81596	6.10073	6.33699	6.53534	6.70616	6.85785	6.99612	7.12324	7.23904	7.34407	7.43474	7.5138	7.5839	7.64789	7.70647	7.75871	7.8026	7.83627	7.8601	7.87582	7.88373	7.88392	7.87422	7.84908	7.79721	7.70113	7.53807	7.27621	6.8731	6.27893	5.42783	4.25491
-0.101358	-0.524678	-0.83928	-1.01033	-1.00637	-0.809599	-0.423122	0.133079	0.830001	1.63288	2.50143	3.3919	4.26255	5.07148	5.81647	6.46794	7.03059	7.51487	7.93559	8.30795	8.64386	8.95117	9.23474	9.4962	9.73635	9.95714	10.1678	10.3751	10.5794	10.7876	11.0024	11.2241	11.4495	11.6727	11.8883	12.0915	12.278	12.4438	12.5845	12.6937	12.763	12.7819	12.7381	12.6157	12.3946	12.0449	11.5381	10.8321	9.87892	8.62923
-0.804177	-1.09129	-1.10099	-0.824199	-0.28977	0.448578	1.32517	2.27495	3.23951	4.17485	5.04998	5.84035	6.52358	7.07928	7.49393	7.76797	7.91219	7.95323	7.91819	7.82924	7.70697	7.5596	7.40672	7.24928	7.08628	6.92744	6.77431	6.63147	6.50375	6.39233	6.29407	6.20159	6.10421	5.99425	5.86713	5.72696	5.57499	5.40947	5.23345	5.03781	4.81212	4.5409	4.20275	3.77142	3.21558	2.50316	1.59955	0.472809	-0.887035	-2.48213
-3.38501	-3.775	-3.96394	-3.94139	-3.71753	-3.31675	-2.77203	-2.10567	-1.34983	-0.521607	0.327786	1.16889	1.95773	2.65112	3.25047	3.75446	4.16784	4.51822	4.82788	5.11339	5.38362	5.64005	5.87942	6.09619	6.28581	6.44579	6.57651	6.68065	6.76007	6.81662	6.85163	6.86502	6.85599	6.82462	6.77083	6.69463	6.60071	6.48772	6.35477	6.18633	5.97786	5.70717	5.35735	4.8993	4.30138	3.52693	2.53715	1.29471	-0.231077	-2.056
-4.21304	-4.39934	-4.37922	-4.15362	-3.72462	-3.0739	-2.24028	-1.27551	-0.209234	0.927961	2.08438	3.22584	4.31809	5.30734	6.1693	6.88778	7.45835	7.88756	8.19174	8.3943	8.52468	8.60588	8.65802	8.69642	8.7297	8.76343	8.80053	8.843	8.89339	8.95506	9.02999	9.11878	9.21954	9.32722	9.43718	9.54656	9.65362	9.7562	9.85197	9.93452	9.9919	10.0084	9.96587	9.84279	9.60592	9.22294	8.64054	7.83561	6.76976	5.45795
2.3728	1.33213	0.419388	-0.281431	-0.685876	-0.753202	-0.497636	0.0461156	0.805835	1.73146	2.73576	3.75614	4.72787	5.62045	6.38027	7.0049	7.50581	7.90547	8.22733	8.49222	8.71543	8.90394	9.05701	9.17448	9.262	9.32937	9.387	9.44433	9.50999	9.59188	9.69625	9.82464	9.97425	10.141	10.3212	10.5126	10.7141	10.9227	11.1329	11.3373	11.5266	11.6906	11.8159	11.8844	11.8699	11.7353	11.4313	10.8971	10.0682	8.88371
-2.3006	-3.52242	-4.49295	-5.12077	-5.38262	-5.31779	-4.98872	-4.46669	-3.79477	-2.99178	-2.07324	-1.06752	-0.0177731	1.02531	2.01025	2.90744	3.70179	4.37974	4.96087	5.47097	5.92526	6.34483	6.73986	7.11332	7.46413	7.78893	8.08372	8.34885	8.58971	8.81501	9.03581	9.26232	9.49997	9.74808	10.0013	10.2521	10.4933	10.7186	10.9235	11.1059	11.2659	11.4053	11.526	11.6252	11.6899	11.6953	11.6053	11.3755	10.954	10.2833
0.513268	-0.736771	-1.79706	-2.54994	-2.94489	-2.99499	-2.76037	-2.31886	-1.72922	-1.02504	-0.229941	0.657017	1.59297	2.54668	3.46952	4.31279	5.0499	5.66573	6.18097	6.60855	6.98543	7.34249	7.70179	8.06753	8.43724	8.77687	9.09272	9.36624	9.6097	9.83618	10.0595	10.2896	10.5312	10.7862	11.0448	11.3008	11.5502	11.8033	12.0592	12.3218	12.5858	12.8452	13.0912	13.3064	13.4763	13.5853	13.6099	13.5205	13.2876	12.8786
-0.0999783	-0.117528	0.0365104	0.358607	0.844648	1.46933	2.18945	2.96244	3.75329	4.52937	5.26348	5.93222	6.52113	7.02303	7.43325	7.76606	8.0226	8.21649	8.3566	8.46492	8.54312	8.60131	8.65039	8.6946	8.73764	8.78249	8.8309	8.88285	8.93824	8.9969	9.05732	9.1178	9.17604	9.23595	9.29406	9.35016	9.41339	9.47797	9.54655	9.61807	9.68937	9.75398	9.79786	9.80501	9.75078	9.59718	9.30737	8.84013	8.14675	7.18808
1.68015	0.512468	-0.498865	-1.31031	-1.86261	-2.1241	-2.08972	-1.77817	-1.22821	-0.485017	0.405592	1.36957	2.35144	3.29786	4.16714	4.9301	5.57664	6.11322	6.56005	6.94358	7.29304	7.62809	7.95734	8.28114	8.59447	8.8898	9.16253	9.41545	9.65437	9.88716	10.1224	10.3668	10.6204	10.8808	11.143	11.4012	11.649	11.8805	12.0879	12.2648	12.4024	12.4861	12.4982	12.4172	12.2181	11.8684	11.3367	10.5879	9.56708	8.26904
-0.0321327	-1.71227	-3.20624	-4.43299	-5.37625	-6.04987	-6.46741	-6.63099	-6.54125	-6.21261	-5.67889	-4.9865	-4.18054	-3.29561	-2.35879	-1.3978	-0.446314	0.462195	1.3048	2.07414	2.77647	3.42747	4.04688	4.65337	5.26142	5.87901	6.50639	7.1371	7.76259	8.3767	8.97739	9.56443	10.1375	10.692	11.2157	11.6909	12.0965	12.4129	12.6248	12.7261	12.7174	12.603	12.3861	12.0674	11.6472	11.1237	10.4874	9.71668	8.77471	7.60664
-1.81242	-3.16294	-4.27421	-5.05622	-5.47582	-5.52507	-5.22357	-4.61789	-3.77232	-2.76881	-1.69268	-0.608804	0.44644	1.42888	2.30995	3.09194	3.77522	4.36547	4.86918	5.29634	5.66535	5.9803	6.26437	6.52991	6.79173	7.06092	7.34494	7.64864	7.97576	8.32835	8.70611	9.10213	9.51804	9.94351	10.3594	10.7621	11.1316	11.4574	11.7301	11.9406	12.0836	12.1524	12.1394	12.0338	11.8212	11.4822	10.9972	10.3312	9.44585	8.26686
-7.06366	-7.7753	-7.99794	-7.78085	-7.18191	-6.25913	-5.07106	-3.69886	-2.23313	-0.758751	0.640653	1.88395	2.91205	3.69479	4.24122	4.60055	4.82708	4.97456	5.10502	5.26372	5.47658	5.75273	6.08983	6.48105	6.91917	7.39123	7.88614	8.39664	8.91594	9.43791	9.95749	10.4669	10.9775	11.4809	11.9623	12.4207	12.8453	13.2305	13.5731	13.8556	14.0752	14.2271	14.3072	14.3111	14.2301	14.0502	13.754	13.3186	12.7125	11.9218
2.4112	2.22063	2.16634	2.2908	2.60526	3.10945	3.76706	4.54363	5.39578	6.27192	7.117	7.88052	8.52314	9.03408	9.41866	9.68844	9.86605	9.96305	9.98767	9.94071	9.822	9.63821	9.39646	9.1099	8.79304	8.45887	8.11772	7.77713	7.44321	7.12121	6.81433	6.52237	6.2421	5.97005	5.70439	5.4448	5.19363	4.95356	4.72499	4.50493	4.28779	4.06588	3.82509	3.55934	3.25375	2.89018	2.43957	1.86191	1.10965	0.140685
-0.793093	-0.955311	-0.948545	-0.769558	-0.429573	0.0525245	0.655359	1.35478	2.12241	2.9226	3.71759	4.47415	5.16912	5.79031	6.33515	6.80796	7.21534	7.5668	7.87101	8.13466	8.36616	8.57294	8.76192	8.93626	9.09653	9.24246	9.37281	9.48714	9.5848	9.66558	9.72981	9.77753	9.80941	9.82583	9.82613	9.81116	9.78018	9.73071	9.6602	9.56344	9.43426	9.26415	9.03867	8.74096	8.34835	7.82515	7.11745	6.16042	4.89912	3.29019
-4.39221	-4.64376	-4.66892	-4.47925	-4.06258	-3.45181	-2.74152	-1.95854	-1.12948	-0.290913	0.545657	1.36937	2.15206	2.85623	3.47407	3.99279	4.40054	4.70056	4.91072	5.05404	5.15163	5.23412	5.31387	5.39615	5.48453	5.57809	5.67686	5.78122	5.89243	6.01011	6.13004	6.24445	6.34354	6.41827	6.45956	6.4652	6.4353	6.3712	6.26863	6.1241	5.937	5.69386	5.3892	5.00953	4.53845	3.95225	3.22105	2.30364	1.15144	-0.264078
[truncated: 50 more columns]
