# Supplementary material for: Comparison of sagittal plane gait characteristics between the overground and treadmill approach for gait analysis in typically developing children
Source: PeerJ. 2022 Jul 22;10:e13752. doi: 10.7717/peerj.13752 (PMC9310770; doi:10.7717/peerj.13752)
Supplement: Supplemental Information 11 — Each colum represents a percentage of the gait cycle (0–100%). Every raw represents data of one child.Sheet 1 data of the overground approachSheet 2 data of the treadmill approach [file peerj-10-13752-s011.xlsx]

## Sheet: 1
3.48549	3.45698	3.41389	3.35596	3.28415	3.20055	3.10866	3.01271	2.89493	2.71704	2.64503	2.58882	2.55113	2.53399	2.53878	2.56628	2.61664	2.6892	2.78279	2.89561	3.02545	3.19224	3.36967	3.53484	3.70114	3.86336	4.01591	4.15329	4.22424	4.29285	4.3516	4.38117	4.38119	4.35283	4.29827	4.22101	4.12507	4.01569	3.89858	3.78004	3.52291	3.41778	3.32844	3.25808	3.20818	3.17881	3.16794	3.17209	3.18631	3.20492
8.43523	8.43838	8.42348	8.401	8.37142	8.33798	8.30618	8.28082	8.26906	8.27678	8.30381	8.35652	8.4347	8.53872	8.67082	8.81746	8.98898	9.18346	9.37486	9.58142	9.78965	9.99376	10.1877	10.3681	10.5401	10.6534	10.7549	10.8278	10.8825	10.8631	10.8328	10.7709	10.6797	10.5684	10.4538	10.2581	10.0792	9.8977	9.73163	9.49305	9.32542	9.07345	8.88131	8.70262	8.5413	8.40032	8.2815	8.18569	8.11235	8.05975
4.90772	4.76928	4.6281	4.48533	4.34226	4.20127	4.0642	3.93262	3.80856	3.69365	3.59021	3.50137	3.42826	3.37333	3.3378	3.32346	3.33038	3.35753	3.40308	3.46418	3.53749	3.61858	3.70323	3.78791	3.86983	3.94641	4.0166	4.0803	4.1371	4.18695	4.231	4.27032	4.30589	4.33882	4.36971	4.39983	4.42816	4.45313	4.47297	4.48677	4.49215	4.48726	4.47161	4.4446	4.3953	4.33384	4.27203	4.215	4.13447	4.03399
4.51632	4.57397	4.62304	4.65974	4.68292	4.69317	4.69349	4.68826	4.68205	4.6798	4.68617	4.70471	4.7386	4.78918	4.85713	4.94177	5.0407	5.15024	5.26514	5.38026	5.48945	5.58806	5.67212	5.74065	5.79383	5.83401	5.8652	5.89163	5.91731	5.94519	5.97723	6.01337	6.0517	6.08877	6.12137	6.14555	6.15859	6.15779	6.14365	6.11762	6.08181	6.04059	5.99759	5.95784	5.92438	5.90013	5.88726	5.88641	5.89774	5.91944
11.2261	11.0185	10.7763	10.5045	10.2085	9.89483	9.57381	9.25486	8.94775	8.66287	8.41209	8.2055	8.05055	7.95077	7.90663	7.91573	7.97347	8.07087	8.20138	8.35431	8.52362	8.70136	8.87964	9.05336	9.22	9.37708	9.52392	9.66281	9.79539	9.92313	10.0476	10.1727	10.3009	10.4339	10.5718	10.714	10.859	11.0044	11.1477	11.2862	11.3417	11.3981	11.4923	11.5649	11.6089	11.6169	11.586	11.5141	11.4039	11.257
17.3761	17.2589	17.258	17.1069	16.9603	16.7917	16.6366	16.4929	16.3333	16.1106	15.9471	15.8198	15.7266	15.6652	15.6108	15.5897	15.6015	15.6597	15.7404	15.8256	15.9305	16.0755	16.2056	16.3185	16.4504	16.5813	16.7189	16.895	17.0123	17.1248	17.2236	17.3704	17.474	17.5843	17.7103	17.8392	17.969	18.0978	18.2225	18.3401	18.4462	18.5747	18.6529	18.6582	18.7155	18.7137	18.6781	18.6289	18.5683	18.4321
6.30349	6.10517	5.90515	5.69589	5.47724	5.25274	5.02761	4.84707	4.65149	4.45201	4.28227	4.13768	4.02248	3.94318	3.89331	3.87715	3.90135	3.97344	4.06461	4.18588	4.33373	4.50478	4.69543	4.89535	5.09486	5.3213	5.55237	5.78522	6.0167	6.24486	6.46749	6.68312	6.89006	7.08701	7.27373	7.44899	7.61196	7.76135	7.89633	8.01542	8.11769	8.2014	8.26478	8.30603	8.31658	8.30115	8.26451	8.20259	8.12143	8.02976
6.91121	6.8757	6.82291	6.75404	6.67094	6.5763	6.47314	6.36485	6.25595	6.15094	6.0541	5.96945	5.90052	5.79229	5.76633	5.77668	5.81413	5.87805	5.96726	6.07951	6.21174	6.35862	6.51444	6.67354	6.82987	6.97808	7.11422	7.23483	7.33799	7.42292	7.48401	7.52609	7.58125	7.58794	7.60299	7.60833	7.60015	7.61587	7.62038	7.59297	7.65313	7.67455	7.67385	7.6566	7.61897	7.59524	7.51946	7.45903	7.38847	7.29764
22.1058	22.0709	22.0146	21.9669	21.8881	21.7993	21.7781	21.6568	21.545	21.4183	21.2883	21.257	21.1931	21.1462	21.1322	21.1503	21.2132	21.2799	21.3615	21.4362	21.5207	21.606	21.6835	21.812	21.8477	21.8847	21.9437	22.004	22.0665	22.1265	22.1927	22.2553	22.3076	22.3992	22.5662	22.56	22.552	22.5763	22.6063	22.5199	22.5401	22.6778	22.6072	22.64	22.6735	22.6984	22.7361	22.8504	22.7278	22.718
8.26716	8.38446	8.56063	8.76623	8.76534	8.79612	8.7627	8.70211	8.79158	8.57613	8.50922	8.489	8.47855	8.5374	8.5818	8.68278	8.799	8.8731	8.98488	9.08935	9.17902	9.2708	9.34484	9.39982	9.42874	9.38849	9.39874	9.30697	9.28119	9.29537	9.2599	9.20727	9.06465	9.02457	8.99098	8.93923	8.87725	8.81443	8.66711	8.36963	8.05138	7.86221	7.5435	7.27176	7.07352	6.93231	6.77473	6.57841	6.41608	6.3282
10.4058	10.3071	10.1893	10.0938	9.98369	9.83263	9.64748	9.45121	9.23773	9.0373	8.95635	8.88003	8.7857	8.71281	8.67563	8.64707	8.6258	8.65369	8.6998	8.75936	8.82769	8.92824	9.04405	9.1921	9.34851	9.54323	9.69734	9.83985	9.99579	10.1312	10.2902	10.4541	10.5975	10.6665	10.7903	10.9447	10.9928	11.1553	11.3263	11.4761	11.6369	11.7589	11.7957	11.8595	11.939	12.0124	12.0759	12.0807	12.0438	11.9848
11.5884	11.4318	11.2707	11.1079	10.946	10.7469	10.564	10.4219	10.3231	10.2506	10.2038	10.1859	10.1996	10.2431	10.317	10.4195	10.5473	10.6983	10.8677	11.0509	11.2412	11.4203	11.6046	11.7914	11.9888	12.1779	12.3327	12.4714	12.5946	12.6993	12.7887	12.8628	12.9225	12.9695	13.0057	13.0319	13.0484	13.0569	13.0565	13.0471	13.0285	13.0044	12.9714	12.9169	12.8485	12.7641	12.6628	12.5455	12.4113	12.2628
10.5212	10.0502	9.55855	9.05621	8.56064	8.08921	7.66088	7.28877	6.98674	6.76716	6.63673	6.5989	6.65186	6.79246	7.01257	7.30144	7.64855	8.03622	8.44999	8.87604	9.29605	9.66811	10.0575	10.4237	10.7576	11.0567	11.3231	11.5583	11.7643	11.9497	12.1194	12.2779	12.4311	12.5834	12.7367	12.9151	13.0837	13.2197	13.3705	13.5102	13.6325	13.7333	13.8056	13.843	13.8432	13.8001	13.7124	13.5805	13.4321	13.2843
8.51015	8.29901	8.06027	7.8	7.51968	7.21991	6.90614	6.58237	6.25321	5.93727	5.64274	5.37791	5.15012	4.96585	4.82048	4.71787	4.65989	4.64353	4.67405	4.74445	4.85497	4.99743	5.17987	5.38642	5.60871	5.83455	6.05172	6.26199	6.45929	6.6375	6.80034	6.95514	7.10997	7.26371	7.42032	7.58379	7.75114	7.92159	8.09293	8.25574	8.4234	8.58234	8.72704	8.84689	8.93811	9.00091	9.02428	9.00753	8.97069	8.88533
8.03544	7.98787	7.92494	7.84826	7.7541	7.65789	7.57451	7.51222	7.46869	7.43997	7.42406	7.41253	7.41055	7.42244	7.43581	7.45771	7.49205	7.5449	7.61359	7.70016	7.7967	7.89301	7.99732	8.09197	8.17203	8.2478	8.31744	8.3661	8.39422	8.42828	8.44003	8.4345	8.42881	8.41456	8.39634	8.38014	8.36179	8.33906	8.31822	8.2975	8.27293	8.24335	8.20757	8.16134	8.1058	8.05141	7.98764	7.90446	7.8234	7.74206
8.05088	7.97759	7.89123	7.79352	7.68585	7.57014	7.4484	7.32286	7.19561	7.06899	6.94529	6.82653	6.7148	6.61202	6.51986	6.43977	6.37274	6.31971	6.28128	6.25761	6.24874	6.25423	6.27351	6.30607	6.35096	6.40711	6.47325	6.54833	6.63093	6.71976	6.81349	6.91061	7.00992	7.10988	7.20897	7.30568	7.3986	7.48612	7.56651	7.63842	7.70018	7.75026	7.78759	7.81078	7.81902	7.81152	7.78772	7.74735	7.6908	7.61866
7.72078	7.6282	7.38717	7.20241	7.03146	6.86016	6.62868	6.4797	6.33912	6.18631	6.05716	6.00188	5.8584	5.79579	5.75936	5.78268	5.73758	5.75836	5.82244	5.83424	5.91244	5.94603	6.01369	6.09509	6.15164	6.22619	6.28877	6.3503	6.41038	6.45526	6.50586	6.58408	6.65293	6.72095	6.75841	6.82889	6.91302	7.00582	7.10752	7.28292	7.40687	7.53569	7.66855	7.79564	7.85671	8.06151	8.17836	8.30114	8.39498	8.43688
-0.398847	-0.691855	-0.767932	-0.889768	-1.06141	-1.28354	-1.55333	-1.86395	-2.20483	-2.56271	-2.9232	-3.27036	-3.58792	-3.8598	-4.07174	-4.21312	-4.27723	-4.2636	-4.18293	-4.05338	-3.86059	-3.62757	-3.36842	-3.09687	-2.8255	-2.56483	-2.3231	-2.10629	-1.91951	-1.76502	-1.64306	-1.5518	-1.48673	-1.44041	-1.40317	-1.3648	-1.31595	-1.25043	-1.16569	-1.06181	-0.941691	-0.794365	-0.498401	-0.480812	-0.408243	-0.299394	-0.211646	-0.15072	-0.121496	-0.128535
14.7629	14.6557	14.4922	14.3698	14.1942	14.0007	13.8037	13.6087	13.4229	13.2549	13.1131	13.0052	12.936	12.9077	12.9197	12.9678	13.0463	13.1491	13.2708	13.407	13.5536	13.7067	13.8621	14.0155	14.1619	14.2976	14.4193	14.5254	14.6153	14.6899	14.7506	14.7993	14.8384	14.8699	14.8963	14.9195	14.9412	14.9623	14.9832	15.0032	15.0208	15.0337	15.0388	15.0324	15.011	14.9716	14.9118	14.8302	14.7268	14.6022
3.91154	3.91951	3.92386	3.97707	3.97584	3.98676	3.9753	3.9367	3.89784	3.86118	3.82913	3.8033	3.78431	3.77157	3.76395	3.76025	3.75974	3.76195	3.76665	3.77379	3.78338	3.79495	3.81635	3.85262	3.86526	3.87749	3.89134	3.95493	3.9769	4.04915	4.0892	4.11976	4.15054	4.18097	4.2106	4.23875	4.26465	4.28781	4.30761	4.32343	4.33486	4.34137	4.34297	4.33935	4.33069	4.30713	4.23404	4.21356	4.1907	4.16589
12.211	11.9651	11.6791	11.3569	11.0042	10.6281	10.2379	9.84473	9.46343	9.1069	8.78634	8.51195	8.29157	8.13029	8.03083	7.99091	8.00583	8.07004	8.1774	8.32012	8.49123	8.68265	8.88755	9.10095	9.31855	9.53714	9.75468	9.97027	10.1841	10.3971	10.6104	10.8254	11.0429	11.2629	11.4849	11.7074	11.9277	12.1425	12.348	12.5399	12.7138	12.8658	12.9931	13.0932	13.1648	13.2057	13.2142	13.1897	13.1308	13.0346
9.83952	9.61378	9.3293	9.13445	8.95375	8.76578	8.66577	8.60327	8.57552	8.58105	8.61695	8.67892	8.7624	8.81235	8.85242	8.97368	9.10169	9.2351	9.37299	9.51447	9.65839	9.80328	9.94721	10.0879	10.2233	10.3515	10.4713	10.5816	10.6821	10.7734	10.8559	11.021	11.1182	11.1698	11.2154	11.2554	11.2892	11.3149	11.3299	11.3302	11.3112	11.2687	11.1993	11.1011	10.9738	10.8187	10.6388	10.4376	10.2194	9.98897
0.428488	0.395329	0.491094	0.509374	0.472515	0.375623	0.221256	0.0162089	-0.23932	-0.524243	-0.809251	-1.07196	-1.30068	-1.47459	-1.59895	-1.67674	-1.71213	-1.74059	-1.72965	-1.69473	-1.63512	-1.54876	-1.4657	-1.37487	-1.29273	-1.23067	-1.17743	-1.13645	-1.1062	-1.08097	-1.05497	-1.03607	-0.998429	-0.96327	-0.933073	-0.895232	-0.859635	-0.855239	-0.867144	-0.910302	-0.968391	-1.04432	-1.1153	-1.19966	-1.27025	-1.35056	-1.41589	-1.46944	-1.51478	-1.56427
5.71735	5.65836	5.5968	5.53269	5.46562	5.39496	5.32014	5.24065	5.15819	5.0759	4.99828	4.93114	4.88881	5.00584	5.02982	5.03162	5.04954	5.08103	5.12363	5.17698	5.24091	5.31508	5.39925	5.49377	5.59909	5.71404	5.83666	5.96584	6.09978	6.23609	6.37225	6.42198	6.55955	6.87884	6.9981	7.10648	7.20374	7.28844	7.45035	7.7646	7.80412	7.65702	7.48739	7.47547	7.44516	7.39653	7.32987	7.33581	7.15893	6.95646
18.1563	18.0779	18.0214	17.9861	17.9708	17.9745	17.9962	18.0341	18.0854	18.1485	18.2222	18.3062	18.3996	18.5028	18.6161	18.7396	18.8741	19.0192	19.1751	19.3407	19.5149	19.6955	19.8795	20.0641	20.2459	20.4209	20.5852	20.735	20.8678	20.9811	21.0734	21.1436	21.1919	21.2186	21.2264	21.2161	21.1911	21.1537	21.1067	21.0526	20.9938	20.9324	20.8696	20.8058	20.7412	20.6755	20.6082	20.5383	20.4647	20.3861
14.6662	14.5464	14.4199	14.2894	14.158	14.029	13.9054	13.7906	13.6875	13.5986	13.5263	13.4723	13.4377	13.4233	13.429	13.4543	13.4982	13.5595	13.6366	13.728	13.832	13.947	14.0716	14.2044	14.3441	14.4892	14.6385	14.7905	14.9434	15.0957	15.2453	15.3904	15.529	15.659	15.7787	15.8862	15.9799	16.0582	16.1198	16.1635	16.1885	16.1938	16.1793	16.1448	16.0904	16.0166	15.9243	15.8147	15.6893	15.5503
8.22354	8.07887	7.932	7.78039	7.62345	7.46564	7.31631	7.17071	7.06141	6.98583	6.93257	6.90041	6.89054	6.90489	6.94469	7.01067	7.10121	7.21297	7.34214	7.48489	7.63798	7.79825	7.96227	8.12696	8.29063	8.45272	8.61293	8.77012	8.92273	9.06892	9.19363	9.31282	9.4268	9.52743	9.61465	9.68737	9.74607	9.79029	9.81962	9.83322	9.83005	9.80846	9.76781	9.70709	9.62612	9.5258	9.407	9.27089	9.1196	8.95385
7.47164	7.40001	7.37914	7.41253	7.36552	7.1341	6.8057	6.39188	5.96664	5.60461	5.36655	5.24313	5.17111	5.1352	5.11399	5.07819	5.04157	5.05682	5.14104	5.30345	5.5541	5.856	6.18721	6.49205	6.7593	6.99043	7.17561	7.32547	7.45636	7.57473	7.69652	7.83891	7.98642	8.1658	8.38453	8.61451	8.84705	9.05382	9.24323	9.38248	9.4588	9.4714	9.40452	9.27078	9.10359	8.91829	8.6963	8.43004	8.18868	7.98657
6.80151	6.71195	6.60872	6.49235	6.36413	6.22655	6.08304	5.93781	5.7956	5.62083	5.4781	5.38504	5.31203	5.26074	5.23193	5.22526	5.23997	5.27472	5.3275	5.39607	5.47776	5.56951	5.66809	5.77028	5.87287	5.97306	6.06847	6.10252	6.16461	6.23258	6.29179	6.34283	6.38661	6.42454	6.45823	6.48914	6.51879	6.54844	6.57908	6.61106	6.64445	6.67873	6.71306	6.74634	6.77743	6.80505	6.82816	6.84569	6.85676	6.86069
11.1619	11.0562	10.9547	10.8513	10.7244	10.5706	10.3924	10.2029	10.0115	9.83299	9.67817	9.54443	9.43006	9.3265	9.22989	9.12564	9.01945	8.92065	8.82115	8.73249	8.66544	8.6222	8.6088	8.61362	8.64781	8.70903	8.79002	8.88281	8.99059	9.10822	9.22459	9.34406	9.46587	9.60301	9.75056	9.91725	10.0856	10.251	10.4032	10.5275	10.6202	10.6812	10.7084	10.7123	10.6799	10.6201	10.533	10.4231	10.3011	10.1746
7.29583	7.23714	7.17029	7.08928	6.98973	6.86756	6.72674	6.58273	6.44831	6.33125	6.24106	6.18381	6.15187	6.13576	6.13454	6.14751	6.16826	6.18872	6.20526	6.21648	6.22479	6.22713	6.22332	6.21614	6.20586	6.19258	6.17613	6.16045	6.14737	6.13635	6.12941	6.13073	6.14415	6.17367	6.21199	6.25599	6.30581	6.35604	6.40185	6.44031	6.46881	6.48495	6.48746	6.47529	6.4468	6.40263	6.34581	6.28132	6.21597	6.15358
9.45411	9.4511	9.44611	9.43939	9.43126	9.422	9.4119	9.40118	9.39004	9.3787	9.36743	9.35661	9.34676	9.3385	9.33258	9.32975	9.33071	9.33608	9.34622	9.36117	9.38065	9.40392	9.42987	9.45704	9.48355	9.50739	9.52651	9.53899	9.54312	9.53752	9.52135	9.49436	9.45682	9.40959	9.35403	9.2919	9.2253	9.15646	9.08775	9.02144	8.95957	8.90397	8.8561	8.8171	8.78781	8.76884	8.7604	8.76254	8.77508	8.79764
9.75548	9.68161	9.58891	9.47959	9.35652	9.2232	9.08358	8.94197	8.80281	8.67053	8.54938	8.44319	8.35515	8.2877	8.24243	8.21963	8.21877	8.23789	8.27426	8.32474	8.38542	8.45256	8.5227	8.59287	8.66077	8.72496	8.78481	8.84044	8.89263	8.94266	8.99214	9.04277	9.09631	9.15424	9.21768	9.28731	9.36327	9.44517	9.53195	9.622	9.71319	9.80293	9.88825	9.96592	10.0326	10.0849	10.1197	10.1342	10.1266	10.0956
8.322	8.26459	8.20399	8.13816	8.06547	7.98515	7.89768	7.80499	7.71026	7.61765	7.5319	7.45793	7.40049	7.36384	7.35137	7.36528	7.4065	7.47464	7.56815	7.68467	7.82138	7.9754	8.14385	8.32371	8.51175	8.70446	8.89758	9.08572	9.262	9.41759	9.54261	9.62879	9.6714	9.6718	9.63797	9.58303	9.52126	9.46314	9.4121	9.36494	9.31757	9.27231	9.2358	9.20622	9.17192	9.11977	9.04146	8.93391	8.79717	8.63259
11.4099	11.2241	11.0324	10.8381	10.6443	10.4539	10.2701	10.097	9.93998	9.80505	9.69861	9.62638	9.59265	9.59941	9.64586	9.72895	9.84425	9.98622	10.1495	10.3292	10.521	10.7209	10.9252	11.1297	11.3295	11.5195	11.6944	11.849	11.9789	12.0807	12.1523	12.1922	12.2	12.1764	12.1227	12.0406	11.9326	11.8021	11.6531	11.49	11.3174	11.14	10.9625	10.7887	10.6222	10.4656	10.3208	10.1892	10.0715	9.96812
7.06546	6.95462	6.84545	6.74013	6.64094	6.55017	6.47007	6.40309	6.35151	6.31674	6.2998	6.30132	6.32157	6.36079	6.41894	6.49527	6.58897	6.6988	6.82277	6.95884	7.10489	7.25798	7.41555	7.57467	7.73246	7.88604	8.03296	8.17095	8.29843	8.41412	8.51723	8.60764	8.68565	8.75158	8.80694	8.85252	8.88917	8.91748	8.93739	8.94855	8.95017	8.94086	8.91909	8.88322	8.83125	8.7614	8.67266	8.56515	8.43884	8.29503
19.2031	19.1203	19.0225	18.9116	18.7897	18.66	18.5264	18.3932	18.2656	18.1485	18.0468	17.965	17.9062	17.8723	17.8634	17.8782	17.9141	17.9672	18.033	18.1068	18.1839	18.2601	18.3323	18.3979	18.4553	18.504	18.544	18.5762	18.6014	18.6204	18.6342	18.6429	18.6467	18.6453	18.638	18.6241	18.6031	18.5745	18.5381	18.4945	18.4445	18.389	18.3294	18.2667	18.2017	18.1347	18.0656	17.9933	17.9165	17.8338
12.6769	12.6026	12.5226	12.4383	12.3514	12.2645	12.1808	12.1038	12.0365	11.9823	11.9437	11.9234	11.9228	11.9434	11.9847	12.0465	12.1276	12.226	12.3394	12.466	12.603	12.7469	12.8946	13.0428	13.1885	13.3281	13.4587	13.5778	13.683	13.7716	13.8426	13.8946	13.9273	13.9404	13.9353	13.9129	13.8742	13.8203	13.7532	13.6748	13.5866	13.4909	13.3887	13.2816	13.1709	13.0578	12.9439	12.8299	12.7168	12.6056
25.0093	24.8877	24.7601	24.629	24.4968	24.3671	24.2422	24.1205	24.0039	23.8964	23.8033	23.7301	23.6838	23.6642	23.6686	23.6915	23.7288	23.7747	23.8234	23.8719	23.9195	23.9656	24.0115	24.0592	24.1103	24.1651	24.2244	24.2875	24.353	24.4196	24.4872	24.5561	24.6262	24.6981	24.7721	24.848	24.9252	25.0028	25.0793	25.153	25.2211	25.2813	25.3306	25.3665	25.3864	25.3883	25.3725	25.3373	25.2851	25.2155
12.0711	12.0918	12.1055	12.1089	12.0984	12.0728	12.0358	11.9936	11.9516	11.913	11.8785	11.8485	11.8241	11.808	11.8033	11.8115	11.8322	11.8641	11.9052	11.9539	12.009	12.0698	12.136	12.2073	12.2884	12.3638	12.4376	12.507	12.569	12.6209	12.6606	12.6872	12.7001	12.6991	12.683	12.6807	12.6488	12.5732	12.4879	12.4355	12.3417	12.2377	12.1287	12.0188	11.9111	11.8072	11.7076	11.6115	11.5179	11.4253
14.0359	13.9582	13.8769	13.7951	13.7157	13.642	13.577	13.5233	13.4831	13.4577	13.4479	13.4538	13.4749	13.5102	13.5587	13.6185	13.6882	13.7656	13.849	13.9361	14.0246	14.112	14.1959	14.2737	14.343	14.4015	14.4474	14.4792	14.4958	14.497	14.4831	14.455	14.414	14.3623	14.3021	14.2357	14.1657	14.0943	14.0239	13.9559	13.8917	13.8317	13.7758	13.7235	13.6737	13.6248	13.5753	13.5239	13.4691	13.4102
14.4562	14.3996	14.3326	14.2562	14.1719	14.0813	13.9858	13.8872	13.7872	13.6877	13.5907	13.4984	13.4126	13.3353	13.2681	13.2122	13.1686	13.1382	13.1214	13.1188	13.1307	13.1573	13.1987	13.2547	13.3249	13.4085	13.5046	13.6121	13.7298	13.8563	13.9903	14.1306	14.2758	14.4248	14.5763	14.7291	14.8819	15.0333	15.1818	15.3257	15.4632	15.5925	15.712	15.82	15.915	15.9957	16.061	16.1099	16.1411	16.1539
-0.084283	-0.179632	-0.269115	-0.350911	-0.423311	-0.484797	-0.534099	-0.570247	-0.592612	-0.600905	-0.595176	-0.575814	-0.543489	-0.499121	-0.443827	-0.378987	-0.30611	-0.2268	-0.142725	-0.0556163	0.0327851	0.120753	0.206638	0.288833	0.365996	0.436915	0.500595	0.556279	0.603493	0.642032	0.671992	0.69375	0.707865	0.715089	0.716271	0.712313	0.704089	0.692424	0.678052	0.661509	0.643223	0.623405	0.602115	0.579272	0.554711	0.528235	0.499621	0.468725	0.435513	0.400116
10.96	10.7452	10.5175	10.2806	10.0388	9.79651	9.55837	9.32924	9.11415	8.91732	8.7423	8.59245	8.47069	8.37937	8.32027	8.2941	8.30144	8.3413	8.41238	8.5129	8.64079	8.79319	8.96721	9.15961	9.36679	9.58537	9.81204	10.0438	10.2777	10.5109	10.7409	10.9655	11.1828	11.3907	11.588	11.773	11.9441	12.1002	12.2396	12.3613	12.4643	12.5475	12.6102	12.6516	12.6715	12.6692	12.6451	12.5998	12.5344	12.45
12.8804	12.7319	12.5615	12.372	12.1666	11.949	11.723	11.4924	11.2614	11.0338	10.8136	10.6043	10.4093	10.2316	10.0739	9.93854	9.82736	9.74166	9.68223	9.64957	9.64348	9.66334	9.70817	9.77672	9.86718	9.9776	10.1058	10.2495	10.4063	10.5737	10.7492	10.9305	11.1151	11.3008	11.4852	11.6662	11.8416	12.009	12.1664	12.3114	12.4419	12.5556	12.6508	12.7257	12.7788	12.809	12.8156	12.7983	12.7574	12.6938
14.7205	14.5374	14.3542	14.1739	13.9997	13.8359	13.6888	13.5633	13.4629	13.3915	13.3526	13.3492	13.3826	13.4514	13.5537	13.6871	13.8483	14.0337	14.2373	14.4544	14.6802	14.9102	15.1404	15.3674	15.5882	15.8016	16.0061	16.2017	16.3891	16.5698	16.7455	16.9179	17.0882	17.2582	17.428	17.5974	17.7644	17.9265	18.0801	18.2206	18.344	18.4445	18.5176	18.5598	18.5673	18.539	18.4731	18.3693	18.2306	18.0575
12.7764	12.6675	12.5512	12.4314	12.3123	12.1981	12.0926	11.9989	11.9193	11.8551	11.807	11.7745	11.7569	11.753	11.7616	11.7813	11.811	11.8497	11.8965	11.9507	12.0115	12.0781	12.1496	12.2252	12.3037	12.3842	12.4654	12.5462	12.6254	12.7021	12.775	12.843	12.9052	12.9604	13.0076	13.0458	13.0741	13.0916	13.0974	13.0909	13.0714	13.0386	12.9922	12.9322	12.8589	12.7729	12.6752	12.567	12.4502	12.3269
11.9044	11.8566	11.8091	11.7618	11.715	11.6698	11.6282	11.5928	11.5664	11.5515	11.5496	11.5608	11.584	11.6173	11.6588	11.7065	11.7588	11.8142	11.8721	11.9322	11.9943	12.0587	12.126	12.1969	12.2721	12.3522	12.4371	12.5261	12.618	12.7111	12.8029	12.8909	12.9728	13.0463	13.1098	13.1623	13.2036	13.2342	13.2549	13.2669	13.271	13.2677	13.257	13.2384	13.2119	13.1774	13.1351	13.0855	13.0288	12.9646
17.7276	17.7175	17.7049	17.691	17.6779	17.6686	17.6665	17.676	17.7014	17.7459	17.8116	17.8994	18.0092	18.1388	18.2847	18.4425	18.607	18.7732	18.9353	19.0886	19.2287	19.3527	19.4582	19.5437	19.6087	19.6534	19.6789	19.6859	19.6758	19.6497	19.6091	19.555	19.4887	19.4112	19.3242	19.229	19.1279	19.0231	18.9171	18.8126	18.712	18.618	18.5322	18.456	18.3899	18.3334	18.2855	18.2447	18.2088	18.1761
8.98257	8.86649	8.74759	8.62755	8.50809	8.39149	8.27987	8.17499	8.07865	7.99254	7.9184	7.8571	7.81011	7.77842	7.76254	7.76286	7.77934	7.81231	7.86104	7.92488	8.00266	8.09314	8.1948	8.30594	8.42475	8.54957	8.67806	8.80838	8.93841	9.06642	9.19087	9.31023	9.42293	9.52758	9.62336	9.70894	9.78325	9.8456	9.89494	9.93047	9.95119	9.95629	9.94526	9.91753	9.87219	9.80981	9.73034	9.63432	9.52262	9.39591
7.48961	7.37122	7.23562	7.0698	6.87932	6.67541	6.47154	6.2807	6.10169	5.93293	5.77047	5.61393	5.47093	5.35301	5.26602	5.21231	5.19053	5.20039	5.23468	5.29281	5.36456	5.45316	5.5527	5.65484	5.75899	5.86524	5.96623	6.05895	6.14331	6.21344	6.27278	6.32541	6.37869	6.42891	6.47936	6.53379	6.59055	6.64845	6.70723	6.76366	6.81835	6.87327	6.92425	6.96773	7.00252	7.02586	7.0356	7.03091	7.00704	6.96028
2.50346	2.43822	2.3784	2.32331	2.27236	2.22533	2.18218	2.14325	2.10926	2.08082	2.05857	2.04297	2.0342	2.03209	2.03623	2.04619	2.06156	2.08203	2.10719	2.13659	2.16984	2.2064	2.24541	2.286	2.32668	2.36622	2.40342	2.43725	2.46705	2.49233	2.51293	2.52921	2.54147	2.54992	2.55466	2.55556	2.55195	2.5435	2.5293	2.50832	2.47958	2.4421	2.39524	2.33868	2.27235	2.19679	2.11291	2.02212	1.92625	1.8276
-7.50776	-7.63261	-7.75898	-7.88645	-8.01422	-8.14103	-8.26515	-8.3844	-8.49612	-8.59732	-8.68457	-8.75408	-8.80277	-8.82831	-8.8287	-8.80342	-8.75265	-8.67786	-8.58148	-8.46709	-8.339	-8.2031	-8.06523	-7.93123	-7.80646	-7.69538	-7.60138	-7.527	-7.47336	-7.44038	-7.42683	-7.43058	-7.44946	-7.4805	-7.5208	-7.56794	-7.61993	-7.67497	-7.73176	-7.78939	-7.84746	-7.90581	-7.96479	-8.02477	-8.0864	-8.15033	-8.21744	-8.28893	-8.36632	-8.45107
13.2857	13.1568	13.0242	12.8915	12.7628	12.6425	12.536	12.4476	12.38	12.3364	12.3186	12.3278	12.3635	12.424	12.5069	12.609	12.7268	12.856	12.9926	13.1322	13.2714	13.4067	13.5354	13.6555	13.7654	13.8638	13.9505	14.0254	14.0885	14.1403	14.1812	14.2123	14.2344	14.2483	14.255	14.2549	14.2492	14.2384	14.2233	14.2039	14.1802	14.1519	14.119	14.081	14.0372	13.987	13.93	13.8662	13.7961	13.7202
16.18	16.1367	16.089	16.0387	15.9879	15.9383	15.8919	15.8501	15.8141	15.7851	15.7634	15.7494	15.7431	15.7442	15.7522	15.7667	15.787	15.8127	15.8432	15.8781	15.9172	15.9603	16.0073	16.058	16.1124	16.1704	16.2318	16.2964	16.364	16.4341	16.5064	16.5803	16.6551	16.7301	16.8044	16.8771	16.9472	17.0135	17.0748	17.1299	17.1775	17.2163	17.2453	17.2633	17.2696	17.2634	17.2444	17.2125	17.168	17.1117
6.05392	5.91562	5.77394	5.63121	5.48983	5.35224	5.221	5.09895	4.98893	4.89281	4.81222	4.7486	4.70319	4.67701	4.67067	4.68404	4.71663	4.76794	4.8375	4.92443	5.02762	5.1453	5.27605	5.41836	5.57058	5.73121	5.89843	6.07076	6.24629	6.42329	6.60004	6.77489	6.94618	7.11207	7.27114	7.42136	7.56134	7.68949	7.80435	7.90435	7.98826	8.05493	8.10359	8.13339	8.14409	8.13552	8.1077	8.06183	7.99876	7.91893
12.3931	12.2955	12.198	12.1012	12.0084	11.92	11.8369	11.7615	11.6958	11.6399	11.595	11.5625	11.5426	11.5346	11.5388	11.5547	11.581	11.6175	11.6628	11.7162	11.7769	11.8442	11.9172	11.9949	12.0765	12.1611	12.2478	12.3357	12.4239	12.5118	12.5982	12.6831	12.766	12.8458	12.9224	12.9952	13.063	13.1254	13.1812	13.2291	13.2681	13.2969	13.3138	13.3174	13.3074	13.2827	13.242	13.185	13.113	13.0265
[truncated: 50 more columns]

## Sheet: 2
3.70743	3.66553	3.59341	3.48842	3.36316	3.228	3.09154	2.95995	2.83803	2.72793	2.62898	2.54487	2.48003	2.43989	2.42846	2.44759	2.49806	2.58038	2.69398	2.84075	3.0135	3.20469	3.40252	3.5998	3.78135	3.93897	4.06647	4.16184	4.22507	4.25879	4.26789	4.25878	4.23971	4.21967	4.20699	4.20792	4.22613	4.25705	4.29041	4.31261	4.31242	4.28681	4.24178	4.19268	4.16142	4.17272	4.24786	4.39174	4.5828	4.77555
5.45054	5.41278	5.46169	5.58182	5.72884	5.84764	5.8972	5.87529	5.79078	5.67959	5.57563	5.50343	5.47486	5.49002	5.54045	5.61254	5.69386	5.77886	5.86771	5.97083	6.08634	6.21078	6.34185	6.46319	6.56577	6.64308	6.69374	6.72089	6.73031	6.72838	6.72077	6.71195	6.70476	6.70029	6.70171	6.70914	6.72657	6.75699	6.80165	6.85576	6.91131	6.95537	6.97129	6.94302	6.86112	6.7249	6.54589	6.34618	6.15454	6.0038
7.15443	7.04224	6.93191	6.83339	6.75791	6.71767	6.72191	6.77124	6.85557	6.96287	7.08457	7.20688	7.32149	7.42747	7.52746	7.62639	7.72945	7.83881	7.95362	8.06984	8.18047	8.27607	8.35045	8.39772	8.41499	8.40398	8.36882	8.31517	8.24747	8.17577	8.10239	8.03458	7.97316	7.91731	7.86325	7.80649	7.74825	7.68646	7.62087	7.55288	7.48161	7.41112	7.34797	7.29833	7.26942	7.26495	7.27971	7.30356	7.3197	7.31544
7.1889	7.20036	7.22642	7.2874	7.38835	7.52126	7.6687	7.80664	7.90851	7.95741	7.94921	7.89442	7.81595	7.73914	7.68652	7.66989	7.68827	7.73015	7.78008	7.82262	7.84288	7.83511	7.79828	7.73656	7.65796	7.57223	7.49041	7.41841	7.36318	7.32623	7.3051	7.29389	7.28436	7.26854	7.24111	7.20087	7.15391	7.11236	7.09139	7.1049	7.16252	7.26635	7.41143	7.58478	7.77271	7.95222	8.10403	8.21093	8.26932	8.28441
9.99525	9.67491	9.32418	8.95292	8.57217	8.20283	7.85914	7.54964	7.28629	7.07456	6.9122	6.79248	6.71032	6.65807	6.62883	6.61678	6.61517	6.62723	6.64675	6.66731	6.68908	6.71009	6.7283	6.74101	6.75042	6.76117	6.77757	6.80474	6.84738	6.90704	6.98954	7.09953	7.24019	7.41269	7.61901	7.85263	8.10705	8.37434	8.6454	8.91018	9.15681	9.37389	9.55617	9.69725	9.79242	9.84073	9.84141	9.79337	9.68615	9.51655
20.7391	20.6219	20.4482	20.2191	19.9444	19.6278	19.2184	18.8301	18.4768	18.1613	17.933	17.8137	17.8123	17.8769	18.0304	18.2706	18.542	18.8521	19.1426	19.3965	19.602	19.7375	19.8038	19.8139	19.7633	19.6785	19.5615	19.4346	19.3114	19.2051	19.1227	19.0744	19.0572	19.0767	19.1417	19.2466	19.3744	19.5204	19.6919	19.8659	20.0326	20.1938	20.3342	20.4274	20.4657	20.4522	20.3923	20.286	20.1612	20.0166
9.69289	9.40449	9.09246	8.76826	8.44362	8.13371	7.85107	7.59723	7.37288	7.17984	7.0188	6.89452	6.80244	6.74408	6.72464	6.73885	6.78151	6.84578	6.92402	7.01057	7.10353	7.19959	7.29834	7.40017	7.50614	7.62084	7.74159	7.87116	8.00999	8.15956	8.32069	8.49333	8.67607	8.86611	9.05982	9.2508	9.4316	9.59529	9.73591	9.85221	9.94279	10.0089	10.0548	10.0813	10.0898	10.0764	10.0302	9.94352	9.80192	9.60655
12.9302	12.8532	12.7306	12.5565	12.337	12.0903	11.8402	11.609	11.4117	11.2515	11.1351	11.0578	11.0163	11.0097	11.0379	11.099	11.188	11.2969	11.4152	11.5301	11.6297	11.7029	11.7433	11.746	11.7112	11.6414	11.5435	11.4285	11.309	11.1973	11.105	11.0428	11.0185	11.0369	11.1002	11.2024	11.3361	11.4919	11.6579	11.8309	11.9941	12.1375	12.2515	12.328	12.3635	12.3589	12.3263	12.285	12.2458	12.2102
7.96193	7.8356	7.68955	7.5105	7.29249	7.04337	6.77747	6.51364	6.27198	6.07023	5.92192	5.83523	5.81327	5.8549	5.95441	6.09913	6.28815	6.50157	6.72393	6.9438	7.14806	7.32526	7.46829	7.57232	7.63746	7.66673	7.66665	7.64656	7.61701	7.59176	7.57843	7.58778	7.62725	7.70245	7.81748	7.96989	8.15973	8.38448	8.62285	8.85404	9.04882	9.17839	9.22314	9.17432	9.03971	8.83866	8.60103	8.36035	8.13925	7.95542
11.8308	11.8699	11.8455	11.7362	11.544	11.293	11.0216	10.7706	10.5715	10.435	10.3538	10.3138	10.2924	10.2721	10.242	10.2008	10.1533	10.1092	10.0748	10.0529	10.0432	10.0412	10.0421	10.0422	10.0401	10.0368	10.0352	10.0389	10.0522	10.0792	10.1262	10.1961	10.2929	10.4172	10.5673	10.7376	10.9195	11.1029	11.2747	11.4188	11.5174	11.5579	11.5382	11.4687	11.3689	11.2642	11.1809	11.1388	11.1444	11.1867
16.4947	16.3469	16.1583	15.9296	15.6757	15.3991	15.1249	14.8649	14.632	14.4362	14.2835	14.1752	14.1087	14.0778	14.0746	14.092	14.1242	14.1678	14.2201	14.2781	14.3388	14.3993	14.4545	14.5016	14.5402	14.5729	14.6059	14.6481	14.7098	14.7995	14.9243	15.0873	15.2879	15.5211	15.7794	16.0522	16.3279	16.5927	16.8282	17.0218	17.1552	17.2217	17.2221	17.1643	17.0625	16.9333	16.7916	16.6463	16.4988	16.3462
7.19086	7.02541	6.8481	6.66214	6.47708	6.30407	6.14658	6.01333	5.91876	5.85898	5.83905	5.87208	5.95282	6.0738	6.23284	6.41924	6.61978	6.8242	7.01933	7.19555	7.34397	7.45863	7.53486	7.57227	7.57466	7.54473	7.4908	7.42433	7.35518	7.29537	7.25811	7.25135	7.28417	7.36128	7.47773	7.63107	7.81096	8.00258	8.19227	8.36465	8.50481	8.60741	8.66497	8.67606	8.6421	8.56043	8.43126	8.24976	8.02329	7.75662
11.7944	11.143	10.4384	9.70818	8.98488	8.30839	7.72625	7.27532	6.97921	6.84447	6.8575	7.00236	7.2509	7.57938	7.95702	8.36727	8.7969	9.23666	9.68101	10.1254	10.564	10.9903	11.3974	11.7792	12.1336	12.4593	12.7579	13.0469	13.3225	13.5975	13.8804	14.1766	14.4892	14.8188	15.1645	15.5194	15.8866	16.2395	16.5854	16.8951	17.1519	17.3416	17.4579	17.5048	17.4851	17.4128	17.3022	17.1629	16.9923	16.7811
12.3387	12.0419	11.7417	11.4455	11.1614	10.9048	10.6835	10.4998	10.3578	10.2615	10.2066	10.1864	10.1958	10.2296	10.2812	10.3471	10.4234	10.5072	10.6003	10.6992	10.803	10.9098	11.0166	11.1194	11.2148	11.3009	11.3787	11.4514	11.5255	11.6069	11.705	11.8277	11.9802	12.164	12.3785	12.6126	12.8526	13.0832	13.2869	13.4437	13.5426	13.5756	13.5478	13.4647	13.3338	13.1661	12.9709	12.7528	12.5107	12.2423
10.6774	10.6336	10.5088	10.3124	10.068	9.80973	9.5763	9.40267	9.31187	9.30819	9.37856	9.49858	9.64252	9.78996	9.92927	10.0566	10.1712	10.2756	10.3696	10.4509	10.5163	10.5625	10.5886	10.596	10.5881	10.5701	10.5476	10.5262	10.5112	10.5062	10.5146	10.5407	10.5884	10.6542	10.7475	10.8633	10.9938	11.1258	11.2428	11.33	11.3767	11.3794	11.3452	11.2918	11.2431	11.2217	11.2397	11.2897	11.3448	11.3687
8.66681	8.50853	8.32362	8.11734	7.90665	7.71373	7.55906	7.45646	7.41052	7.41729	7.46485	7.53844	7.62165	7.70072	7.76866	7.82142	7.8577	7.87885	7.88508	7.87529	7.84815	7.80279	7.73947	7.66045	7.5713	7.47824	7.38927	7.31247	7.25606	7.22827	7.23655	7.28562	7.37758	7.51279	7.68715	7.89058	8.10825	8.32151	8.50941	8.65203	8.73317	8.74333	8.68233	8.55853	8.38729	8.18706	7.97423	7.75864	7.54062	7.3124
4.81178	4.64879	4.45902	4.23153	3.97624	3.71735	3.48602	3.31079	3.21053	3.19077	3.2433	3.34965	3.48763	3.63764	3.7874	3.93166	4.06986	4.20164	4.3257	4.43881	4.5383	4.62128	4.68764	4.73983	4.78225	4.81953	4.85672	4.89891	4.95271	5.02353	5.1155	5.23289	5.37814	5.55209	5.75419	5.97909	6.2174	6.45618	6.6812	6.87829	7.03097	7.12884	7.16575	7.14106	7.06193	6.94256	6.80312	6.66403	6.53915	6.42966
0.203176	0.132369	0.0647816	-0.0105438	-0.102852	-0.216701	-0.350238	-0.499028	-0.657199	-0.815848	-0.972951	-1.12534	-1.26656	-1.38693	-1.46924	-1.4959	-1.45571	-1.34565	-1.17438	-0.960374	-0.728217	-0.504648	-0.314404	-0.175672	-0.0976145	-0.0796842	-0.109894	-0.169459	-0.241025	-0.299027	-0.323147	-0.297638	-0.213522	-0.0698981	0.127228	0.359001	0.619226	0.877055	1.11641	1.31651	1.46269	1.54411	1.55773	1.50861	1.40892	1.27416	1.11973	0.957491	0.792607	0.630775
11.2192	11.1336	11.048	10.9532	10.8454	10.7252	10.5973	10.4676	10.3417	10.2229	10.1114	10.0052	9.90181	9.80071	9.70434	9.61799	9.54682	9.49001	9.4512	9.42285	9.39543	9.35892	9.30471	9.22829	9.12742	9.00909	8.88052	8.75311	8.63797	8.54446	8.48594	8.47033	8.50478	8.59172	8.73349	8.92562	9.16092	9.42832	9.71213	9.99165	10.2433	10.4436	10.5748	10.6289	10.6126	10.544	10.4461	10.3375	10.2284	10.1217
4.55882	4.53711	4.48978	4.42721	4.36358	4.31419	4.28934	4.2912	4.31426	4.34931	4.38774	4.42577	4.46989	4.52374	4.58621	4.6543	4.7196	4.77621	4.82105	4.85182	4.87037	4.87955	4.88123	4.87716	4.87273	4.86829	4.87422	4.89199	4.92359	4.96926	5.02852	5.09937	5.17591	5.25136	5.31673	5.3658	5.395	5.40398	5.39666	5.37679	5.34637	5.30537	5.25246	5.18817	5.11791	5.05338	5.00792	4.98902	4.99666	5.01847
14.2182	14.0583	13.8678	13.6409	13.3825	13.1057	12.8281	12.5662	12.3285	12.1134	11.9173	11.7388	11.5794	11.4418	11.3274	11.2395	11.1782	11.1419	11.128	11.1341	11.1572	11.1922	11.235	11.2822	11.3318	11.3841	11.4424	11.5118	11.6005	11.7184	11.8735	12.0718	12.3158	12.6002	12.9186	13.255	13.5919	13.9094	14.1868	14.4002	14.5439	14.6064	14.5867	14.4984	14.358	14.1836	13.9912	13.7975	13.619	13.4657
10.497	10.3817	10.2289	10.0418	9.84817	9.687	9.59461	9.58765	9.65816	9.77745	9.90639	10.0123	10.0813	10.1188	10.1402	10.163	10.2023	10.2628	10.3404	10.4286	10.5215	10.615	10.7062	10.7926	10.8717	10.9411	10.9995	11.0468	11.0852	11.1203	11.1608	11.2169	11.2987	11.4131	11.5623	11.7386	11.9263	12.1009	12.2287	12.2751	12.2144	12.0412	11.7743	11.4401	11.0867	10.7559	10.4877	10.3027	10.195	10.1347
6.86475	6.70151	6.50566	6.29106	6.0782	5.88679	5.73046	5.61543	5.54161	5.50278	5.48854	5.48791	5.49275	5.49719	5.49773	5.49206	5.47798	5.45262	5.41405	5.36088	5.2934	5.21425	5.12929	5.04784	4.98144	4.94204	4.94155	4.98876	5.09035	5.24675	5.46101	5.72343	6.01617	6.31906	6.60534	6.85167	7.03846	7.15136	7.1829	7.13275	7.01116	6.83687	6.63727	6.44155	6.27509	6.15471	6.077	6.02409	5.97243	5.90311
6.26793	6.14802	5.98452	5.78341	5.5547	5.31545	5.08916	4.89321	4.73824	4.63027	4.57145	4.56165	4.59831	4.67442	4.78151	4.91001	5.05308	5.20472	5.36	5.51428	5.66364	5.80525	5.93691	6.05624	6.16518	6.26561	6.35802	6.44784	6.54084	6.644	6.76456	6.9094	7.0851	7.29227	7.53034	7.78898	8.05441	8.30763	8.52791	8.69579	8.79781	8.8295	8.79412	8.70247	8.57142	8.42046	8.26643	8.11653	7.96377	7.79331
26.4702	26.4964	26.4472	26.3112	26.0951	25.8158	25.4978	25.1777	24.8857	24.6446	24.4631	24.3501	24.3131	24.3472	24.4445	24.5933	24.7834	25.0002	25.2312	25.4628	25.6824	25.8783	26.0496	26.188	26.2911	26.3597	26.3956	26.4029	26.3874	26.3562	26.3149	26.2729	26.2337	26.2002	26.1732	26.1493	26.1304	26.114	26.1004	26.0878	26.075	26.0587	26.0365	26.009	25.9803	25.9574	25.9531	25.9738	26.0129	26.0547
16.2838	16.3043	16.3045	16.2604	16.162	16.0074	15.8051	15.5696	15.318	15.0678	14.8332	14.6258	14.4556	14.3314	14.2606	14.2477	14.2934	14.394	14.5403	14.7174	14.9071	15.089	15.2432	15.3527	15.4093	15.4145	15.378	15.3144	15.2408	15.1741	15.1291	15.116	15.1385	15.1958	15.2835	15.3962	15.5283	15.6748	15.8292	15.9813	16.1169	16.2187	16.2708	16.264	16.1998	16.0906	15.9573	15.8244	15.7139	15.6405
5.14361	4.88078	4.59016	4.29762	4.0268	3.79711	3.62279	3.51391	3.47235	3.48969	3.55608	3.66334	3.80334	3.96586	4.14075	4.316	4.47583	4.61116	4.71557	4.78759	4.83131	4.8545	4.86726	4.88079	4.90633	4.95313	5.02997	5.14155	5.28988	5.47286	5.6827	5.90805	6.13327	6.34277	6.51746	6.65316	6.73581	6.76291	6.73563	6.65743	6.5368	6.38379	6.21127	6.03433	5.86637	5.71093	5.56028	5.39393	5.18859	4.9289
5.95481	5.94529	5.89617	5.81326	5.70706	5.58874	5.46719	5.34712	5.23642	5.13725	5.05227	4.98561	4.94298	4.92925	4.94825	5.00207	5.081	5.18163	5.29443	5.40836	5.51608	5.61456	5.70817	5.80001	5.89574	6.00356	6.13305	6.28757	6.46973	6.67899	6.91303	7.16791	7.4373	7.7125	7.98108	8.22694	8.43131	8.57319	8.63545	8.60816	8.49246	8.30174	8.06224	7.80533	7.56515	7.37551	7.25012	7.18304	7.15379	7.13603
7.85462	7.87428	7.8503	7.77283	7.65234	7.51442	7.3894	7.30229	7.26597	7.27808	7.32673	7.39355	7.46306	7.52624	7.5848	7.64759	7.72267	7.81151	7.9068	7.99636	8.06855	8.11426	8.12861	8.11298	8.07415	8.02061	7.95966	7.89506	7.82684	7.75421	7.67891	7.60639	7.54392	7.49827	7.47561	7.47938	7.51052	7.5669	7.64314	7.7299	7.81449	7.88499	7.93398	7.95975	7.9661	7.96167	7.96034	7.97684	8.01703	8.07234
17.6817	17.5278	17.3315	17.0945	16.8227	16.5403	16.2656	16.0173	15.8073	15.6387	15.5059	15.3963	15.2981	15.2011	15.0986	14.9882	14.8707	14.7504	14.6348	14.5328	14.4524	14.3998	14.3769	14.3817	14.408	14.448	14.4943	14.5448	14.6023	14.6767	14.7769	14.9146	15.0987	15.3315	15.6067	15.9142	16.2359	16.5532	16.8423	17.0818	17.2454	17.3151	17.2909	17.1839	17.0239	16.846	16.6809	16.5458	16.444	16.3511
8.26214	8.18831	8.07899	7.92888	7.75001	7.56184	7.38279	7.22726	7.1047	7.0159	6.95219	6.89902	6.84214	6.77382	6.69371	6.60736	6.52044	6.43846	6.36673	6.30912	6.26672	6.23981	6.22689	6.22469	6.22885	6.23539	6.24205	6.24961	6.26291	6.29022	6.34112	6.42658	6.55296	6.72285	6.93396	7.1749	7.43052	7.68103	7.90527	8.07976	8.18351	8.2011	8.13043	7.98279	7.78223	7.55981	7.34845	7.17722	7.05962	6.99172
8.49838	8.62809	8.73239	8.78674	8.78316	8.73584	8.66484	8.58477	8.49742	8.39855	8.27915	8.13908	7.98605	7.83432	7.69956	7.5945	7.52444	7.48845	7.48035	7.48984	7.50656	7.52267	7.53113	7.52783	7.51144	7.48127	7.43563	7.37278	7.2927	7.19885	7.09881	7.0031	6.92009	6.86481	6.84652	6.87078	6.93892	7.04654	7.18387	7.33629	7.48538	7.61615	7.721	7.79757	7.85682	7.91459	7.99631	8.12447	8.30433	8.51994
8.6777	8.77137	8.87693	8.95252	8.97365	8.93555	8.84916	8.73383	8.60913	8.4899	8.3855	8.30148	8.2428	8.21381	8.21708	8.25145	8.3096	8.38251	8.46079	8.53678	8.60508	8.6624	8.70738	8.73848	8.75378	8.75015	8.72486	8.67776	8.61005	8.52598	8.43223	8.33702	8.25061	8.1846	8.15112	8.15801	8.20846	8.29822	8.41399	8.53359	8.6326	8.68899	8.6883	8.62442	8.5019	8.33498	8.15168	7.98952	7.88491	7.85895
8.2392	8.28816	8.37448	8.47073	8.55333	8.6029	8.61267	8.58702	8.53278	8.46218	8.38264	8.29926	8.21709	8.14038	8.07262	8.0159	7.97066	7.937	7.91525	7.90538	7.91025	7.92831	7.95978	8.00442	8.06022	8.12373	8.19017	8.25393	8.30938	8.35195	8.37956	8.39322	8.39612	8.39265	8.3873	8.38178	8.37774	8.37404	8.36763	8.35271	8.32052	8.26093	8.16501	8.02899	7.85472	7.65007	7.43041	7.21529	7.02298	6.86537
12.5923	12.7367	12.8759	12.9598	12.9602	12.8871	12.7737	12.6605	12.5788	12.5454	12.5632	12.6232	12.7082	12.8003	12.8863	12.9606	13.0271	13.0935	13.1674	13.2541	13.354	13.4597	13.56	13.6421	13.6948	13.7112	13.6928	13.6404	13.5595	13.4563	13.338	13.2122	13.0863	12.9683	12.8662	12.7856	12.7282	12.6912	12.6684	12.6513	12.6297	12.5916	12.5266	12.429	12.3013	12.1525	11.9993	11.8676	11.7887	11.7847
11.2756	11.0989	10.849	10.542	10.2022	9.85795	9.53815	9.27118	9.07809	8.96292	8.92255	8.9487	9.03209	9.16134	9.32346	9.50424	9.70122	9.9068	10.1152	10.3284	10.5427	10.753	10.9522	11.1307	11.2787	11.3888	11.4541	11.473	11.4508	11.3933	11.308	11.2087	11.1062	11.0111	10.9342	10.884	10.8614	10.8677	10.9028	10.957	11.0178	11.0718	11.1072	11.116	11.1008	11.0695	11.0303	10.9793	10.9106	10.8059
16.9591	16.9799	16.9989	16.9877	16.9324	16.8366	16.7169	16.5926	16.4774	16.3763	16.289	16.2131	16.1467	16.0874	16.0313	15.9735	15.9105	15.8422	15.7719	15.7059	15.6498	15.6084	15.5841	15.5786	15.5928	15.6252	15.6737	15.7349	15.8057	15.8825	15.9624	16.043	16.1223	16.1979	16.2657	16.3186	16.3479	16.3459	16.3072	16.2305	16.1179	15.9762	15.8161	15.6488	15.4841	15.331	15.2014	15.1103	15.073	15.0953
18.8241	18.6653	18.4591	18.2063	17.9107	17.5838	17.2521	16.9356	16.651	16.4179	16.2471	16.1379	16.0907	16.1049	16.172	16.2822	16.4247	16.5894	16.7646	16.9399	17.1046	17.2497	17.3668	17.4506	17.499	17.5133	17.4981	17.4627	17.416	17.3684	17.3311	17.312	17.3146	17.3402	17.3891	17.4524	17.5227	17.5909	17.6473	17.6852	17.7011	17.6945	17.6681	17.6296	17.5888	17.556	17.5387	17.5361	17.5387	17.5266
22.8245	22.6557	22.4358	22.1735	21.8858	21.5856	21.2913	21.0326	20.8169	20.651	20.5368	20.4743	20.4609	20.4906	20.5578	20.6555	20.7764	20.9143	21.054	21.1829	21.2871	21.3534	21.3736	21.3443	21.268	21.1542	21.0165	20.873	20.742	20.6386	20.5764	20.5641	20.6087	20.7079	20.8615	21.0596	21.2947	21.5512	21.8116	22.0579	22.2809	22.4597	22.5881	22.668	22.7068	22.7157	22.7052	22.6779	22.6243	22.5361
16.6912	16.6058	16.486	16.3126	16.079	15.7933	15.4759	15.1541	14.8551	14.602	14.4125	14.2871	14.2296	14.2296	14.275	14.3535	14.4546	14.5698	14.6915	14.8121	14.9233	15.0157	15.0797	15.1058	15.0873	15.0222	14.9121	14.7699	14.6111	14.4554	14.3225	14.2301	14.1911	14.2119	14.2926	14.4241	14.5918	14.777	14.9624	15.1325	15.2682	15.3589	15.3979	15.3789	15.3069	15.1887	15.037	14.8683	14.6991	14.5414
6.95763	7.13674	7.2969	7.41954	7.50259	7.55522	7.58997	7.61516	7.63178	7.63483	7.62442	7.60018	7.56812	7.53871	7.52356	7.5329	7.57251	7.64141	7.73598	7.84517	7.95667	8.06681	8.16149	8.23729	8.29052	8.32235	8.33235	8.32353	8.29986	8.26701	8.23167	8.20138	8.18346	8.1826	8.20512	8.24962	8.31333	8.38789	8.46056	8.51713	8.54614	8.54054	8.50312	8.44274	8.37039	8.31029	8.29028	8.32881	8.42153	8.53788
13.816	13.8029	13.7302	13.5975	13.4191	13.2189	13.0135	12.823	12.6513	12.4963	12.3522	12.2135	12.0745	11.9352	11.8016	11.6779	11.5677	11.4729	11.3907	11.3218	11.2686	11.2288	11.2012	11.1835	11.1715	11.1631	11.1622	11.1769	11.2159	11.2896	11.4063	11.5738	11.7925	12.0581	12.3615	12.6857	13.0124	13.3242	13.6002	13.8309	14.0077	14.1243	14.1779	14.1707	14.1109	14.0137	13.8993	13.7897	13.6991	13.6251
2.1327	2.07019	1.97162	1.82586	1.6355	1.41586	1.18851	0.973391	0.784122	0.625703	0.496049	0.388458	0.295032	0.212253	0.138139	0.0813572	0.0489408	0.0479227	0.0814495	0.14677	0.236632	0.340148	0.445647	0.543235	0.626631	0.69224	0.741767	0.778528	0.804673	0.8261	0.848519	0.878464	0.922714	0.988046	1.08069	1.2037	1.35612	1.53181	1.71845	1.89951	2.05667	2.17379	2.24021	2.25184	2.21145	2.12684	2.01042	1.87621	1.73632	1.5975
13.9867	13.8772	13.7438	13.5731	13.3607	13.1099	12.8299	12.5362	12.2481	11.9854	11.7642	11.5961	11.4873	11.4385	11.4455	11.499	11.5859	11.6968	11.8204	11.9439	12.0608	12.1655	12.2548	12.3305	12.4008	12.4645	12.531	12.6076	12.7011	12.8161	12.9554	13.1199	13.3071	13.5113	13.727	13.9467	14.1647	14.3757	14.5719	14.7431	14.877	14.961	14.9868	14.9518	14.8632	14.7408	14.6119	14.5064	14.4408	14.4142
14.743	14.501	14.2356	13.9491	13.6487	13.3462	13.06	12.8057	12.6042	12.4661	12.3993	12.395	12.4362	12.5015	12.5776	12.6482	12.7014	12.73	12.7289	12.695	12.628	12.5318	12.4152	12.2906	12.1724	12.0749	12.0106	11.9885	12.0146	12.0923	12.2216	12.4013	12.6276	12.8936	13.1918	13.5137	13.8385	14.1543	14.4441	14.6968	14.8934	15.0247	15.0836	15.0731	15.0027	14.8852	14.7334	14.5576	14.3641	14.1549
18.1399	17.87	17.5614	17.2202	16.8556	16.4868	16.1423	15.8398	15.5935	15.4221	15.3348	15.3236	15.381	15.4997	15.668	15.8726	16.1037	16.3531	16.6121	16.8727	17.1264	17.3653	17.5817	17.7702	17.9287	18.0581	18.1625	18.2481	18.3292	18.4151	18.5178	18.6497	18.8189	19.0287	19.2792	19.5602	19.8592	20.1562	20.4296	20.6584	20.8242	20.9146	20.9249	20.8598	20.7272	20.5437	20.3241	20.082	19.8213	19.5399
13.5883	13.6459	13.6767	13.6394	13.5121	13.3006	13.0385	12.7656	12.5273	12.3451	12.2299	12.1773	12.1747	12.2056	12.255	12.3132	12.3758	12.4387	12.4968	12.5441	12.5758	12.5875	12.5788	12.5536	12.5181	12.4782	12.4401	12.409	12.3905	12.3906	12.4155	12.471	12.5625	12.6938	12.8654	13.0728	13.3058	13.5495	13.7852	13.9898	14.1393	14.2143	14.2074	14.1245	13.9866	13.8267	13.6851	13.5945	13.5566	13.545
10.3829	10.3781	10.3514	10.2879	10.178	10.0217	9.8242	9.60334	9.38308	9.18691	9.02983	8.91576	8.84034	8.79514	8.77156	8.76305	8.76866	8.79266	8.83995	8.91245	9.00381	9.10412	9.20066	9.28144	9.33871	9.36955	9.37633	9.36631	9.34913	9.33522	9.33426	9.35463	9.40237	9.48084	9.59062	9.72849	9.89002	10.0704	10.2659	10.4718	10.6792	10.8706	11.023	11.114	11.1287	11.0647	10.9364	10.7742	10.6163	10.4941
16.6749	16.6971	16.7033	16.6737	16.5988	16.4832	16.3452	16.2157	16.1291	16.1106	16.1634	16.2698	16.4024	16.5296	16.6258	16.6777	16.6876	16.6681	16.6322	16.5937	16.5579	16.5247	16.4903	16.4512	16.4035	16.3503	16.2902	16.2287	16.1711	16.124	16.0932	16.0827	16.0936	16.1262	16.1794	16.2509	16.3408	16.4474	16.5661	16.6931	16.8209	16.9392	17.0406	17.1152	17.1596	17.1718	17.1531	17.1166	17.082	17.0622
8.47945	8.2617	8.0265	7.7783	7.52473	7.27595	7.04569	6.84585	6.68642	6.57312	6.50804	6.48975	6.51102	6.56358	6.64122	6.73881	6.84597	6.9566	7.06836	7.18351	7.29243	7.39329	7.48737	7.57502	7.65674	7.73409	7.8092	7.88617	7.9688	8.06094	8.16837	8.29565	8.44494	8.61543	8.81056	9.0231	9.24729	9.46368	9.66269	9.82936	9.9515	10.02	10.0334	9.99765	9.92002	9.81343	9.69002	9.55576	9.41254	9.25815
7.95037	7.95702	7.92361	7.83089	7.67272	7.45161	7.18226	6.88901	6.60181	6.34531	6.13404	5.98874	5.90771	5.88294	5.90115	5.94723	6.00557	6.06207	6.10421	6.12181	6.10695	6.05308	5.95757	5.82028	5.64706	5.44581	5.22791	5.00755	4.79959	4.61929	4.47965	4.39149	4.36165	4.39327	4.4884	4.6409	4.84196	5.07865	5.33326	5.58515	5.8129	5.99561	6.11813	6.17415	6.16789	6.11253	6.02708	5.92569	5.81559	5.6905
1.8718	1.86758	1.88251	1.89785	1.89561	1.86817	1.82234	1.7762	1.75121	1.76369	1.81947	1.91365	2.03434	2.16654	2.29486	2.40459	2.48294	2.5202	2.51123	2.45582	2.35771	2.22367	2.06315	1.88549	1.69883	1.50906	1.32085	1.13966	0.972372	0.826917	0.712257	0.639516	0.621037	0.668566	0.790798	0.987852	1.25269	1.56768	1.9045	2.22709	2.4993	2.6943	2.80119	2.82423	2.78124	2.69874	2.60742	2.53539	2.50112	2.50932
4.10405	4.12274	4.13193	4.10415	4.01678	3.85801	3.63067	3.35303	3.05562	2.77418	2.53915	2.36334	2.25092	2.20591	2.22265	2.29414	2.41194	2.56555	2.74377	2.93818	3.14256	3.34118	3.53191	3.70247	3.8432	3.94751	4.00987	4.02948	4.00813	3.9537	3.87774	3.79614	3.72114	3.66646	3.64781	3.66878	3.73241	3.83535	3.96607	4.10942	4.2463	4.35637	4.4236	4.43922	4.40368	4.32647	4.22787	4.12934	4.04482	3.97628
19.26	19.0361	18.7726	18.4848	18.1906	17.9105	17.669	17.4803	17.3488	17.273	17.2465	17.2596	17.3007	17.3569	17.4212	17.5003	17.5774	17.6485	17.7089	17.7512	17.7689	17.7574	17.7138	17.6386	17.5328	17.4014	17.2516	17.0924	16.9329	16.7817	16.6482	16.5399	16.4626	16.4199	16.4191	16.4601	16.5448	16.6701	16.8362	17.0286	17.2364	17.4436	17.6315	17.783	17.885	17.9272	17.9041	17.8134	17.6567	17.4444
19.0259	18.9255	18.7918	18.6328	18.4675	18.3092	18.1796	18.0892	18.041	18.0309	18.0508	18.0915	18.1454	18.2079	18.2752	18.3431	18.4063	18.4577	18.4902	18.4992	18.4844	18.4468	18.3923	18.3264	18.2571	18.1938	18.1464	18.1239	18.1346	18.1845	18.2756	18.407	18.5738	18.766	18.9701	19.1714	19.3569	19.5158	19.6385	19.7181	19.7496	19.7318	19.6691	19.5714	19.4556	19.3451	19.2655	19.2318	19.2378	19.2551
6.8824	6.75524	6.63712	6.5315	6.44428	6.38189	6.34893	6.34488	6.36259	6.39026	6.41617	6.43312	6.43975	6.43976	6.43868	6.44004	6.44372	6.44607	6.4421	6.42921	6.40856	6.38258	6.35457	6.32871	6.31098	6.30836	6.32871	6.37883	6.46485	6.58998	6.75685	6.96581	7.21101	7.48272	7.76873	8.05432	8.3257	8.56718	8.76516	8.90797	8.99257	9.02259	9.00304	8.94449	8.85952	8.759	8.65319	8.5484	8.4435	8.33149
18.4619	18.3968	18.3141	18.2121	18.0882	17.9405	17.7843	17.6274	17.4806	17.3565	17.2555	17.1788	17.129	17.1066	17.1083	17.1323	17.1767	17.2376	17.3103	17.3885	17.4632	17.5289	17.5764	17.5985	17.5925	17.56	17.5055	17.4376	17.3677	17.3074	17.2685	17.2598	17.2864	17.3493	17.4479	17.574	17.7193	17.8737	18.0268	18.1684	18.2886	18.3833	18.4463	18.4786	18.4857	18.4757	18.4552	18.423	18.3707	18.285
[truncated: 50 more columns]
